# Supplementary material for: Study of TRAF3IP3 for prognosis and immune infiltration in hepatocellular carcinoma
Source: PeerJ. 2024 Dec 12;12:e18538. doi: 10.7717/peerj.18538 (PMC11646420; doi:10.7717/peerj.18538)
Supplement: Supplemental Information 8 [file peerj-12-18538-s008.xlsx]

## Sheet: Sheet1
geneNames	TRAF3IP3	Type
GSM362951	2.21744	Normal
GSM362953	2.23828	Normal
GSM362955	2.31102	Normal
GSM362957	2.30461	Normal
GSM363421	2.23317	Normal
GSM363423	2.29895	Normal
GSM363425	2.24702	Normal
GSM363427	2.24631	Normal
GSM363429	2.25227	Normal
GSM363431	2.25751	Normal
GSM363433	2.30597	Normal
GSM363435	2.2852	Normal
GSM363437	2.24803	Normal
GSM363439	2.2228	Normal
GSM363441	2.33714	Normal
GSM363443	2.24245	Normal
GSM363445	2.25711	Normal
GSM363447	2.40681	Normal
GSM363449	2.31885	Normal
GSM363450	2.28619	Normal
GSM363451	2.18713	Normal
GSM362947	2.15629	Tumor
GSM362948	2.22363	Tumor
GSM362949	2.25399	Tumor
GSM362950	2.19808	Tumor
GSM362952	2.17909	Tumor
GSM362954	2.2397	Tumor
GSM362956	2.15402	Tumor
GSM363420	2.30432	Tumor
GSM363422	2.24265	Tumor
GSM363424	2.16886	Tumor
GSM363426	2.15208	Tumor
GSM363428	2.12961	Tumor
GSM363430	2.17153	Tumor
GSM363432	2.18047	Tumor
GSM363434	2.1964	Tumor
GSM363436	2.24479	Tumor
GSM363438	2.45917	Tumor
GSM363440	2.20216	Tumor
GSM363442	2.17675	Tumor
GSM363444	2.36205	Tumor
GSM363446	2.23869	Tumor
GSM363448	2.40145	Tumor
geneNames
GSM362951
GSM362953
GSM362955
GSM362957
GSM363421
GSM363423
GSM363425
GSM363427
GSM363429
GSM363431
GSM363433
GSM363435
GSM363437
GSM363439
GSM363441
GSM363443
GSM363445
GSM363447
GSM363449
GSM363450
GSM363451
GSM362947
GSM362948
GSM362949
GSM362950
GSM362952
GSM362954
GSM362956
GSM363420
GSM363422
GSM363424
GSM363426
GSM363428
GSM363430
GSM363432
GSM363434
GSM363436
GSM363438
GSM363440
GSM363442
GSM363444
GSM363446
GSM363448
geneNames
GSM362951
GSM362953
GSM362955
GSM362957
GSM363421
GSM363423
GSM363425
GSM363427
GSM363429
GSM363431
GSM363433
GSM363435
GSM363437
GSM363439
GSM363441
GSM363443
GSM363445
GSM363447
GSM363449
GSM363450
GSM363451
GSM362947
GSM362948
GSM362949
GSM362950
GSM362952
GSM362954
GSM362956
GSM363420
GSM363422
GSM363424
GSM363426
GSM363428
GSM363430
GSM363432
GSM363434
GSM363436
GSM363438
GSM363440
GSM363442
GSM363444
GSM363446
GSM363448
geneNames
GSM362951
GSM362953
GSM362955
GSM362957
GSM363421
GSM363423
GSM363425
GSM363427
GSM363429
GSM363431
GSM363433
GSM363435
GSM363437
GSM363439
GSM363441
GSM363443
GSM363445
GSM363447
GSM363449
GSM363450
GSM363451
GSM362947
GSM362948
GSM362949
GSM362950
GSM362952
GSM362954
GSM362956
GSM363420
GSM363422
GSM363424
GSM363426
GSM363428
GSM363430
GSM363432
GSM363434
GSM363436
GSM363438
GSM363440
GSM363442
GSM363444
GSM363446
GSM363448
geneNames
GSM362951
GSM362953
GSM362955
GSM362957
GSM363421
GSM363423
GSM363425
GSM363427
GSM363429
GSM363431
GSM363433
GSM363435
GSM363437
GSM363439
GSM363441
GSM363443
GSM363445
GSM363447
GSM363449
GSM363450
GSM363451
GSM362947
GSM362948
GSM362949
GSM362950
GSM362952
GSM362954
GSM362956
GSM363420
GSM363422
GSM363424
GSM363426
GSM363428
GSM363430
GSM363432
GSM363434
GSM363436
GSM363438
GSM363440
GSM363442
GSM363444
GSM363446
GSM363448
geneNames
GSM362951
GSM362953
GSM362955
GSM362957
GSM363421
GSM363423
GSM363425
GSM363427
GSM363429
GSM363431
GSM363433
GSM363435
GSM363437
GSM363439
GSM363441
GSM363443
GSM363445
GSM363447
GSM363449
GSM363450
GSM363451
GSM362947
GSM362948
GSM362949
GSM362950
GSM362952
GSM362954
GSM362956
GSM363420
GSM363422
GSM363424
GSM363426
GSM363428
GSM363430
GSM363432
GSM363434
GSM363436
GSM363438
GSM363440
GSM363442
GSM363444
GSM363446
GSM363448
geneNames
GSM362951
GSM362953
GSM362955
GSM362957
GSM363421
GSM363423
GSM363425
GSM363427
GSM363429
GSM363431
GSM363433
GSM363435
GSM363437
GSM363439
GSM363441
GSM363443
GSM363445
GSM363447
GSM363449
GSM363450
GSM363451
GSM362947
GSM362948
GSM362949
GSM362950
GSM362952
GSM362954
GSM362956
GSM363420
GSM363422
GSM363424
GSM363426
GSM363428
GSM363430
GSM363432
GSM363434
GSM363436
GSM363438
GSM363440
GSM363442
GSM363444
GSM363446
GSM363448
geneNames
GSM362951
GSM362953
GSM362955
GSM362957
GSM363421
GSM363423
GSM363425
GSM363427
GSM363429
GSM363431
GSM363433
GSM363435
GSM363437
GSM363439
GSM363441
GSM363443
GSM363445
GSM363447
GSM363449
GSM363450
GSM363451
GSM362947
GSM362948
GSM362949
GSM362950
GSM362952
GSM362954
GSM362956
GSM363420
GSM363422
GSM363424
GSM363426
GSM363428
GSM363430
GSM363432
GSM363434
GSM363436
GSM363438
GSM363440
GSM363442
GSM363444
GSM363446
GSM363448
geneNames
GSM362951
GSM362953
GSM362955
GSM362957
GSM363421
GSM363423
GSM363425
GSM363427
GSM363429
GSM363431
GSM363433
GSM363435
GSM363437
GSM363439
GSM363441
GSM363443
GSM363445
GSM363447
GSM363449
GSM363450
GSM363451
GSM362947
GSM362948
GSM362949
GSM362950
GSM362952
GSM362954
GSM362956
GSM363420
GSM363422
GSM363424
GSM363426
GSM363428
GSM363430
GSM363432
GSM363434
GSM363436
GSM363438
GSM363440
GSM363442
GSM363444
GSM363446
GSM363448
geneNames
GSM362951
GSM362953
GSM362955
GSM362957
GSM363421
GSM363423
GSM363425
GSM363427
GSM363429
GSM363431
GSM363433
GSM363435
GSM363437
GSM363439
GSM363441
GSM363443
GSM363445
GSM363447
GSM363449
GSM363450
GSM363451
GSM362947
GSM362948
GSM362949
GSM362950
GSM362952
GSM362954
GSM362956
GSM363420
GSM363422
GSM363424
GSM363426
GSM363428
GSM363430
GSM363432
GSM363434
GSM363436
GSM363438
GSM363440
GSM363442
GSM363444
GSM363446
GSM363448
geneNames
GSM362951
GSM362953
GSM362955
GSM362957
GSM363421
GSM363423
GSM363425
GSM363427
GSM363429
GSM363431
GSM363433
GSM363435
GSM363437
GSM363439
GSM363441
GSM363443
GSM363445
GSM363447
GSM363449
GSM363450
GSM363451
GSM362947
GSM362948
GSM362949
GSM362950
GSM362952
GSM362954
GSM362956
GSM363420
GSM363422
GSM363424
GSM363426
GSM363428
GSM363430
GSM363432
GSM363434
GSM363436
GSM363438
GSM363440
GSM363442
GSM363444
GSM363446
GSM363448
geneNames
GSM362951
GSM362953
GSM362955
GSM362957
GSM363421
GSM363423
GSM363425
GSM363427
GSM363429
GSM363431
GSM363433
GSM363435
GSM363437
GSM363439
GSM363441
GSM363443
GSM363445
GSM363447
GSM363449
GSM363450
GSM363451
GSM362947
GSM362948
GSM362949
GSM362950
GSM362952
GSM362954
GSM362956
GSM363420
GSM363422
GSM363424
GSM363426
GSM363428
GSM363430
GSM363432
GSM363434
GSM363436
GSM363438
GSM363440
GSM363442
GSM363444
GSM363446
GSM363448
geneNames
GSM362951
GSM362953
GSM362955
GSM362957
GSM363421
GSM363423
GSM363425
GSM363427
GSM363429
GSM363431
GSM363433
GSM363435
GSM363437
GSM363439
GSM363441
GSM363443
GSM363445
GSM363447
GSM363449
GSM363450
GSM363451
GSM362947
GSM362948
GSM362949
GSM362950
GSM362952
GSM362954
GSM362956
GSM363420
GSM363422
GSM363424
GSM363426
GSM363428
GSM363430
GSM363432
GSM363434
GSM363436
GSM363438
GSM363440
GSM363442
GSM363444
GSM363446
GSM363448
geneNames
GSM362951
GSM362953
GSM362955
GSM362957
GSM363421
GSM363423
GSM363425
GSM363427
GSM363429
GSM363431
GSM363433
GSM363435
GSM363437
GSM363439
GSM363441
GSM363443
GSM363445
GSM363447
GSM363449
GSM363450
GSM363451
GSM362947
GSM362948
GSM362949
GSM362950
GSM362952
GSM362954
GSM362956
GSM363420
GSM363422
GSM363424
GSM363426
GSM363428
GSM363430
GSM363432
GSM363434
GSM363436
GSM363438
GSM363440
GSM363442
GSM363444
GSM363446
GSM363448
geneNames
GSM362951
GSM362953
GSM362955
GSM362957
GSM363421
GSM363423
GSM363425
GSM363427
GSM363429
GSM363431
GSM363433
GSM363435
GSM363437
GSM363439
GSM363441
GSM363443
GSM363445
GSM363447
GSM363449
GSM363450
GSM363451
GSM362947
GSM362948
GSM362949
GSM362950
GSM362952
GSM362954
GSM362956
GSM363420
GSM363422
GSM363424
GSM363426
GSM363428
GSM363430
GSM363432
GSM363434
GSM363436
GSM363438
GSM363440
GSM363442
GSM363444
GSM363446
GSM363448
geneNames
GSM362951
GSM362953
GSM362955
GSM362957
GSM363421
GSM363423
GSM363425
GSM363427
GSM363429
GSM363431
GSM363433
GSM363435
GSM363437
GSM363439
GSM363441
GSM363443
GSM363445
GSM363447
GSM363449
GSM363450
GSM363451
GSM362947
GSM362948
GSM362949
GSM362950
GSM362952
GSM362954
GSM362956
GSM363420
GSM363422
GSM363424
GSM363426
GSM363428
GSM363430
GSM363432
GSM363434
GSM363436
GSM363438
GSM363440
GSM363442
GSM363444
GSM363446
GSM363448
geneNames
GSM362951
GSM362953
GSM362955
GSM362957
GSM363421
GSM363423
GSM363425
GSM363427
GSM363429
GSM363431
GSM363433
GSM363435
GSM363437
GSM363439
GSM363441
GSM363443
GSM363445
GSM363447
GSM363449
GSM363450
GSM363451
GSM362947
GSM362948
GSM362949
GSM362950
GSM362952
GSM362954
GSM362956
GSM363420
GSM363422
GSM363424
GSM363426
GSM363428
GSM363430
GSM363432
GSM363434
GSM363436
GSM363438
GSM363440
GSM363442
GSM363444
GSM363446
GSM363448
geneNames
GSM362951
GSM362953
GSM362955
GSM362957
GSM363421
GSM363423
GSM363425
GSM363427
GSM363429
GSM363431
GSM363433
GSM363435
GSM363437
GSM363439
GSM363441
GSM363443
GSM363445
GSM363447
GSM363449
GSM363450
GSM363451
GSM362947
GSM362948
GSM362949
GSM362950
GSM362952
GSM362954
GSM362956
GSM363420
GSM363422
GSM363424
GSM363426
GSM363428
GSM363430
GSM363432
GSM363434
GSM363436
GSM363438
GSM363440
GSM363442
GSM363444
GSM363446
GSM363448
geneNames
GSM362951
GSM362953
GSM362955
GSM362957
GSM363421
GSM363423
GSM363425
GSM363427
GSM363429
GSM363431
GSM363433
GSM363435
GSM363437
GSM363439
GSM363441
GSM363443
GSM363445
GSM363447
GSM363449
GSM363450
GSM363451
GSM362947
GSM362948
GSM362949
GSM362950
GSM362952
GSM362954
GSM362956
GSM363420
GSM363422
GSM363424
GSM363426
GSM363428
GSM363430
GSM363432
GSM363434
GSM363436
GSM363438
GSM363440
GSM363442
GSM363444
GSM363446
GSM363448
geneNames
GSM362951
GSM362953
GSM362955
GSM362957
GSM363421
GSM363423
GSM363425
GSM363427
GSM363429
GSM363431
GSM363433
GSM363435
GSM363437
GSM363439
GSM363441
GSM363443
GSM363445
GSM363447
GSM363449
GSM363450
GSM363451
GSM362947
GSM362948
GSM362949
GSM362950
GSM362952
GSM362954
GSM362956
GSM363420
GSM363422
GSM363424
GSM363426
GSM363428
GSM363430
GSM363432
GSM363434
GSM363436
GSM363438
GSM363440
GSM363442
GSM363444
GSM363446
GSM363448
geneNames
GSM362951
GSM362953
GSM362955
GSM362957
GSM363421
GSM363423
GSM363425
GSM363427
GSM363429
GSM363431
GSM363433
GSM363435
GSM363437
GSM363439
GSM363441
GSM363443
GSM363445
GSM363447
GSM363449
GSM363450
GSM363451
GSM362947
GSM362948
GSM362949
GSM362950
GSM362952
GSM362954
GSM362956
GSM363420
GSM363422
GSM363424
GSM363426
GSM363428
GSM363430
GSM363432
GSM363434
GSM363436
GSM363438
GSM363440
GSM363442
GSM363444
GSM363446
GSM363448
geneNames
GSM362951
GSM362953
GSM362955
GSM362957
GSM363421
GSM363423
GSM363425
GSM363427
GSM363429
GSM363431
GSM363433
GSM363435
GSM363437
GSM363439
GSM363441
GSM363443
GSM363445
GSM363447
GSM363449
GSM363450
GSM363451
GSM362947
GSM362948
GSM362949
GSM362950
GSM362952
GSM362954
GSM362956
GSM363420
GSM363422
GSM363424
GSM363426
GSM363428
GSM363430
GSM363432
GSM363434
GSM363436
GSM363438
GSM363440
GSM363442
GSM363444
GSM363446
GSM363448
geneNames
GSM362951
GSM362953
GSM362955
GSM362957
GSM363421
GSM363423
GSM363425
GSM363427
GSM363429
GSM363431
GSM363433
GSM363435
GSM363437
GSM363439
GSM363441
GSM363443
GSM363445
GSM363447
GSM363449
GSM363450
GSM363451
GSM362947
GSM362948
GSM362949
GSM362950
GSM362952
GSM362954
GSM362956
GSM363420
GSM363422
GSM363424
GSM363426
GSM363428
GSM363430
GSM363432
GSM363434
GSM363436
GSM363438
GSM363440
GSM363442
GSM363444
GSM363446
GSM363448
geneNames
GSM362951
GSM362953
GSM362955
GSM362957
GSM363421
GSM363423
GSM363425
GSM363427
GSM363429
GSM363431
GSM363433
GSM363435
GSM363437
GSM363439
GSM363441
GSM363443
GSM363445
GSM363447
GSM363449
GSM363450
GSM363451
GSM362947
GSM362948
GSM362949
GSM362950
GSM362952
GSM362954
GSM362956
GSM363420
GSM363422
GSM363424
GSM363426
GSM363428
GSM363430
GSM363432
GSM363434
GSM363436
GSM363438
GSM363440
GSM363442
GSM363444
GSM363446
GSM363448
geneNames
GSM362951
GSM362953
GSM362955
GSM362957
GSM363421
GSM363423
GSM363425
GSM363427
GSM363429
GSM363431
GSM363433
GSM363435
GSM363437
GSM363439
GSM363441
GSM363443
GSM363445
GSM363447
GSM363449
GSM363450
GSM363451
GSM362947
GSM362948
GSM362949
GSM362950
GSM362952
GSM362954
GSM362956
GSM363420
GSM363422
GSM363424
GSM363426
GSM363428
GSM363430
GSM363432
GSM363434
GSM363436
GSM363438
GSM363440
GSM363442
GSM363444
GSM363446
GSM363448
geneNames
GSM362951
GSM362953
GSM362955
GSM362957
GSM363421
GSM363423
GSM363425
GSM363427
GSM363429
GSM363431
GSM363433
GSM363435
GSM363437
GSM363439
GSM363441
GSM363443
GSM363445
GSM363447
GSM363449
GSM363450
GSM363451
GSM362947
GSM362948
GSM362949
GSM362950
GSM362952
GSM362954
GSM362956
GSM363420
GSM363422
GSM363424
GSM363426
GSM363428
GSM363430
GSM363432
GSM363434
GSM363436
GSM363438
GSM363440
GSM363442
GSM363444
GSM363446
GSM363448
geneNames
GSM362951
GSM362953
GSM362955
GSM362957
GSM363421
GSM363423
GSM363425
GSM363427
GSM363429
GSM363431
GSM363433
GSM363435
GSM363437
GSM363439
GSM363441
GSM363443
GSM363445
GSM363447
GSM363449
GSM363450
GSM363451
GSM362947
GSM362948
GSM362949
GSM362950
GSM362952
GSM362954
GSM362956
GSM363420
GSM363422
GSM363424
GSM363426
GSM363428
GSM363430
GSM363432
GSM363434
GSM363436
GSM363438
GSM363440
GSM363442
GSM363444
GSM363446
GSM363448
geneNames
GSM362951
GSM362953
GSM362955
GSM362957
GSM363421
GSM363423
GSM363425
GSM363427
GSM363429
GSM363431
GSM363433
GSM363435
GSM363437
GSM363439
GSM363441
GSM363443
GSM363445
GSM363447
GSM363449
GSM363450
GSM363451
GSM362947
GSM362948
GSM362949
GSM362950
GSM362952
GSM362954
GSM362956
GSM363420
GSM363422
GSM363424
GSM363426
GSM363428
GSM363430
GSM363432
GSM363434
GSM363436
GSM363438
GSM363440
GSM363442
GSM363444
GSM363446
GSM363448
geneNames
GSM362951
GSM362953
GSM362955
GSM362957
GSM363421
GSM363423
GSM363425
GSM363427
GSM363429
GSM363431
GSM363433
GSM363435
GSM363437
GSM363439
GSM363441
GSM363443
GSM363445
GSM363447
GSM363449
GSM363450
GSM363451
GSM362947
GSM362948
GSM362949
GSM362950
GSM362952
GSM362954
GSM362956
GSM363420
GSM363422
GSM363424
GSM363426
GSM363428
GSM363430
GSM363432
GSM363434
GSM363436
GSM363438
GSM363440
GSM363442
GSM363444
GSM363446
GSM363448
geneNames
GSM362951
GSM362953
GSM362955
GSM362957
GSM363421
GSM363423
GSM363425
GSM363427
GSM363429
GSM363431
GSM363433
GSM363435
GSM363437
GSM363439
GSM363441
GSM363443
GSM363445
GSM363447
GSM363449
GSM363450
GSM363451
GSM362947
GSM362948
GSM362949
GSM362950
GSM362952
GSM362954
GSM362956
GSM363420
GSM363422
GSM363424
GSM363426
GSM363428
GSM363430
GSM363432
GSM363434
GSM363436
GSM363438
GSM363440
GSM363442
GSM363444
GSM363446
GSM363448
geneNames
GSM362951
GSM362953
GSM362955
GSM362957
GSM363421
GSM363423
GSM363425
GSM363427
GSM363429
GSM363431
GSM363433
GSM363435
GSM363437
GSM363439
GSM363441
GSM363443
GSM363445
GSM363447
GSM363449
GSM363450
GSM363451
GSM362947
GSM362948
GSM362949
GSM362950
GSM362952
GSM362954
GSM362956
GSM363420
GSM363422
GSM363424
GSM363426
GSM363428
GSM363430
GSM363432
GSM363434
GSM363436
GSM363438
GSM363440
GSM363442
GSM363444
GSM363446
GSM363448
geneNames
GSM362951
GSM362953
GSM362955
GSM362957
GSM363421
GSM363423
GSM363425
GSM363427
GSM363429
GSM363431
GSM363433
GSM363435
GSM363437
GSM363439
GSM363441
GSM363443
GSM363445
GSM363447
GSM363449
GSM363450
GSM363451
GSM362947
GSM362948
GSM362949
GSM362950
GSM362952
GSM362954
GSM362956
GSM363420
GSM363422
GSM363424
GSM363426
GSM363428
GSM363430
GSM363432
GSM363434
GSM363436
GSM363438
GSM363440
GSM363442
GSM363444
GSM363446
GSM363448
geneNames
GSM362951
GSM362953
GSM362955
GSM362957
GSM363421
GSM363423
GSM363425
GSM363427
GSM363429
GSM363431
GSM363433
GSM363435
GSM363437
GSM363439
GSM363441
GSM363443
GSM363445
GSM363447
GSM363449
GSM363450
GSM363451
GSM362947
GSM362948
GSM362949
GSM362950
GSM362952
GSM362954
GSM362956
GSM363420
GSM363422
GSM363424
GSM363426
GSM363428
GSM363430
GSM363432
GSM363434
GSM363436
GSM363438
GSM363440
GSM363442
GSM363444
GSM363446
GSM363448
geneNames
GSM362951
GSM362953
GSM362955
GSM362957
GSM363421
GSM363423
GSM363425
GSM363427
GSM363429
GSM363431
GSM363433
GSM363435
GSM363437
GSM363439
GSM363441
GSM363443
GSM363445
GSM363447
GSM363449
GSM363450
GSM363451
GSM362947
GSM362948
GSM362949
GSM362950
GSM362952
GSM362954
GSM362956
GSM363420
GSM363422
GSM363424
GSM363426
GSM363428
GSM363430
GSM363432
GSM363434
GSM363436
GSM363438
GSM363440
GSM363442
GSM363444
GSM363446
GSM363448
geneNames
GSM362951
GSM362953
GSM362955
GSM362957
GSM363421
GSM363423
GSM363425
GSM363427
GSM363429
GSM363431
GSM363433
GSM363435
GSM363437
GSM363439
GSM363441
GSM363443
GSM363445
GSM363447
GSM363449
GSM363450
GSM363451
GSM362947
GSM362948
GSM362949
GSM362950
GSM362952
GSM362954
GSM362956
GSM363420
GSM363422
GSM363424
GSM363426
GSM363428
GSM363430
GSM363432
GSM363434
GSM363436
GSM363438
GSM363440
GSM363442
GSM363444
GSM363446
GSM363448
geneNames
GSM362951
GSM362953
GSM362955
GSM362957
GSM363421
GSM363423
GSM363425
GSM363427
GSM363429
GSM363431
GSM363433
GSM363435
GSM363437
GSM363439
GSM363441
GSM363443
GSM363445
GSM363447
GSM363449
GSM363450
GSM363451
GSM362947
GSM362948
GSM362949
GSM362950
GSM362952
GSM362954
GSM362956
GSM363420
GSM363422
GSM363424
GSM363426
GSM363428
GSM363430
GSM363432
GSM363434
GSM363436
GSM363438
GSM363440
GSM363442
GSM363444
GSM363446
GSM363448
geneNames
GSM362951
GSM362953
GSM362955
GSM362957
GSM363421
GSM363423
GSM363425
GSM363427
GSM363429
GSM363431
GSM363433
GSM363435
GSM363437
GSM363439
GSM363441
GSM363443
GSM363445
GSM363447
GSM363449
GSM363450
GSM363451
GSM362947
GSM362948
GSM362949
GSM362950
GSM362952
GSM362954
GSM362956
GSM363420
GSM363422
GSM363424
GSM363426
GSM363428
GSM363430
GSM363432
GSM363434
GSM363436
GSM363438
GSM363440
GSM363442
GSM363444
GSM363446
GSM363448
geneNames
GSM362951
GSM362953
GSM362955
GSM362957
GSM363421
GSM363423
GSM363425
GSM363427
GSM363429
GSM363431
GSM363433
GSM363435
GSM363437
GSM363439
GSM363441
GSM363443
GSM363445
GSM363447
GSM363449
GSM363450
GSM363451
GSM362947
GSM362948
GSM362949
GSM362950
GSM362952
GSM362954
GSM362956
GSM363420
GSM363422
GSM363424
GSM363426
GSM363428
GSM363430
GSM363432
GSM363434
GSM363436
GSM363438
GSM363440
GSM363442
GSM363444
GSM363446
GSM363448
geneNames
GSM362951
GSM362953
GSM362955
GSM362957
GSM363421
GSM363423
GSM363425
GSM363427
GSM363429
GSM363431
GSM363433
GSM363435
GSM363437
GSM363439
GSM363441
GSM363443
GSM363445
GSM363447
GSM363449
GSM363450
GSM363451
GSM362947
GSM362948
GSM362949
GSM362950
GSM362952
GSM362954
GSM362956
GSM363420
GSM363422
GSM363424
GSM363426
GSM363428
GSM363430
GSM363432
GSM363434
GSM363436
GSM363438
GSM363440
GSM363442
GSM363444
GSM363446
GSM363448
geneNames
GSM362951
GSM362953
GSM362955
GSM362957
GSM363421
GSM363423
GSM363425
GSM363427
GSM363429
GSM363431
GSM363433
GSM363435
GSM363437
GSM363439
GSM363441
GSM363443
GSM363445
GSM363447
GSM363449
GSM363450
GSM363451
GSM362947
GSM362948
GSM362949
GSM362950
GSM362952
GSM362954
GSM362956
GSM363420
GSM363422
GSM363424
GSM363426
GSM363428
GSM363430
GSM363432
GSM363434
GSM363436
GSM363438
GSM363440
GSM363442
GSM363444
GSM363446
GSM363448
geneNames
GSM362951
GSM362953
GSM362955
GSM362957
GSM363421
GSM363423
GSM363425
GSM363427
GSM363429
GSM363431
GSM363433
GSM363435
GSM363437
GSM363439
GSM363441
GSM363443
GSM363445
GSM363447
GSM363449
GSM363450
GSM363451
GSM362947
GSM362948
GSM362949
GSM362950
GSM362952
GSM362954
GSM362956
GSM363420
GSM363422
GSM363424
GSM363426
GSM363428
GSM363430
GSM363432
GSM363434
GSM363436
GSM363438
GSM363440
GSM363442
GSM363444
GSM363446
GSM363448
geneNames
GSM362951
GSM362953
GSM362955
GSM362957
GSM363421
GSM363423
GSM363425
GSM363427
GSM363429
GSM363431
GSM363433
GSM363435
GSM363437
GSM363439
GSM363441
GSM363443
GSM363445
GSM363447
GSM363449
GSM363450
GSM363451
GSM362947
GSM362948
GSM362949
GSM362950
GSM362952
GSM362954
GSM362956
GSM363420
GSM363422
GSM363424
GSM363426
GSM363428
GSM363430
GSM363432
GSM363434
GSM363436
GSM363438
GSM363440
GSM363442
GSM363444
GSM363446
GSM363448
geneNames
GSM362951
GSM362953
GSM362955
GSM362957
GSM363421
GSM363423
GSM363425
GSM363427
GSM363429
GSM363431
GSM363433
GSM363435
GSM363437
GSM363439
GSM363441
GSM363443
GSM363445
GSM363447
GSM363449
GSM363450
GSM363451
GSM362947
GSM362948
GSM362949
GSM362950
GSM362952
GSM362954
GSM362956
GSM363420
GSM363422
GSM363424
GSM363426
GSM363428
GSM363430
GSM363432
GSM363434
GSM363436
GSM363438
GSM363440
GSM363442
GSM363444
GSM363446
GSM363448
geneNames
GSM362951
GSM362953
GSM362955
GSM362957
GSM363421
GSM363423
GSM363425
GSM363427
GSM363429
GSM363431
GSM363433
GSM363435
GSM363437
GSM363439
GSM363441
GSM363443
GSM363445
GSM363447
GSM363449
GSM363450
GSM363451
GSM362947
GSM362948
GSM362949
GSM362950
GSM362952
GSM362954
GSM362956
GSM363420
GSM363422
GSM363424
GSM363426
GSM363428
GSM363430
GSM363432
GSM363434
GSM363436
GSM363438
GSM363440
GSM363442
GSM363444
GSM363446
GSM363448
geneNames
GSM362951
GSM362953
GSM362955
GSM362957
GSM363421
GSM363423
GSM363425
GSM363427
GSM363429
GSM363431
GSM363433
GSM363435
GSM363437
GSM363439
GSM363441
GSM363443
GSM363445
GSM363447
GSM363449
GSM363450
GSM363451
GSM362947
GSM362948
GSM362949
GSM362950
GSM362952
GSM362954
GSM362956
GSM363420
GSM363422
GSM363424
GSM363426
GSM363428
GSM363430
GSM363432
GSM363434
GSM363436
GSM363438
GSM363440
GSM363442
GSM363444
GSM363446
GSM363448
geneNames
GSM362951
GSM362953
GSM362955
GSM362957
GSM363421
GSM363423
GSM363425
GSM363427
GSM363429
GSM363431
GSM363433
GSM363435
GSM363437
GSM363439
GSM363441
GSM363443
GSM363445
GSM363447
GSM363449
[truncated: 816 more rows]
