# Supplementary material for: Study of TRAF3IP3 for prognosis and immune infiltration in hepatocellular carcinoma
Source: PeerJ. 2024 Dec 12;12:e18538. doi: 10.7717/peerj.18538 (PMC11646420; doi:10.7717/peerj.18538)
Supplement: Supplemental Information 9 [file peerj-12-18538-s009.xlsx]

## Sheet: Sheet1
geneNames	TRAF3IP3	Type
GSM3428716	2.69619	Tumor
GSM3428717	2.6764	Tumor
GSM3428718	2.81991	Tumor
GSM3428719	2.54812	Tumor
GSM3428720	2.61854	Tumor
GSM3428721	2.68881	Tumor
GSM3428722	2.89562	Tumor
GSM3428723	2.82636	Tumor
GSM3428724	2.67533	Tumor
GSM3428725	2.58758	Tumor
GSM3428726	2.64549	Tumor
GSM3428727	2.7691	Tumor
GSM3428728	2.5508	Tumor
GSM3428729	2.7159	Tumor
GSM3428730	2.71806	Tumor
GSM3428731	2.79441	Tumor
GSM3428732	2.54848	Tumor
GSM3428733	2.93079	Tumor
GSM3428734	2.53034	Tumor
GSM3428735	2.85324	Tumor
GSM3428736	2.73527	Tumor
GSM3428737	2.70964	Tumor
GSM3428738	2.5814	Tumor
GSM3428739	2.74833	Tumor
GSM3428740	2.57571	Tumor
GSM3428741	2.99476	Tumor
GSM3428742	2.75223	Tumor
GSM3428743	2.71931	Tumor
GSM3428744	2.69396	Tumor
GSM3428745	2.6264	Tumor
GSM3428746	2.53575	Tumor
GSM3428747	2.70501	Tumor
GSM3428748	2.82588	Tumor
GSM3428749	2.9009	Tumor
GSM3428750	2.58544	Tumor
GSM3428751	2.61909	Tumor
GSM3428752	2.7709	Tumor
GSM3428753	2.67503	Tumor
GSM3428754	2.61909	Tumor
GSM3428755	2.74728	Tumor
GSM3428756	2.68197	Tumor
GSM3428757	2.78758	Tumor
GSM3428758	2.56379	Tumor
GSM3428759	2.68996	Tumor
GSM3428760	2.68869	Tumor
GSM3428761	2.63508	Tumor
GSM3428762	2.73942	Tumor
GSM3428763	2.83845	Tumor
GSM3428764	2.93559	Tumor
GSM3428765	2.60301	Tumor
GSM3428766	2.71729	Tumor
GSM3428767	2.68126	Tumor
GSM3428768	2.61786	Tumor
GSM3428769	2.68153	Tumor
GSM3428770	2.93496	Tumor
GSM3428771	2.67081	Tumor
GSM3428772	2.75509	Tumor
GSM3428773	2.66927	Tumor
GSM3428774	2.8079	Tumor
GSM3428775	2.65735	Tumor
GSM3428776	2.61253	Tumor
GSM3428777	2.70094	Tumor
GSM3428778	2.63849	Tumor
GSM3428779	2.55654	Tumor
GSM3428780	2.82362	Tumor
GSM3428781	2.93957	Tumor
GSM3428782	2.67161	Tumor
GSM3428783	2.62004	Tumor
GSM3428784	2.65806	Tumor
GSM3428785	2.7856	Tumor
GSM3428786	2.78137	Normal
GSM3428787	2.69429	Normal
GSM3428788	2.81954	Normal
GSM3428789	2.8335	Normal
GSM3428790	2.87886	Normal
GSM3428791	2.69564	Normal
GSM3428792	2.76948	Normal
GSM3428793	2.64662	Normal
GSM3428794	2.69238	Normal
GSM3428795	2.7457	Normal
GSM3428796	2.7781	Normal
GSM3428797	2.80287	Normal
GSM3428798	2.81947	Normal
GSM3428799	2.7334	Normal
GSM3428800	2.79538	Normal
GSM3428801	2.81313	Normal
GSM3428802	2.6321	Normal
GSM3428803	2.78792	Normal
GSM3428804	2.73031	Normal
GSM3428805	2.7332	Normal
GSM3428806	2.66457	Normal
GSM3428807	2.99408	Normal
GSM3428808	2.76026	Normal
GSM3428809	2.78538	Normal
GSM3428810	2.7413	Normal
GSM3428811	2.82189	Normal
GSM3428812	2.7518	Normal
GSM3428813	2.80436	Normal
GSM3428814	2.8073	Normal
GSM3428815	2.74774	Normal
GSM3428816	2.86645	Normal
GSM3428817	2.78763	Normal
GSM3428818	2.59896	Normal
GSM3428819	2.78163	Normal
GSM3428820	2.73632	Normal
GSM3428821	2.76869	Normal
GSM3428822	2.83575	Normal
geneNames
GSM3428716
GSM3428717
GSM3428718
GSM3428719
GSM3428720
GSM3428721
GSM3428722
GSM3428723
GSM3428724
GSM3428725
GSM3428726
GSM3428727
GSM3428728
GSM3428729
GSM3428730
GSM3428731
GSM3428732
GSM3428733
GSM3428734
GSM3428735
GSM3428736
GSM3428737
GSM3428738
GSM3428739
GSM3428740
GSM3428741
GSM3428742
GSM3428743
GSM3428744
GSM3428745
GSM3428746
GSM3428747
GSM3428748
GSM3428749
GSM3428750
GSM3428751
GSM3428752
GSM3428753
GSM3428754
GSM3428755
GSM3428756
GSM3428757
GSM3428758
GSM3428759
GSM3428760
GSM3428761
GSM3428762
GSM3428763
GSM3428764
GSM3428765
GSM3428766
GSM3428767
GSM3428768
GSM3428769
GSM3428770
GSM3428771
GSM3428772
GSM3428773
GSM3428774
GSM3428775
GSM3428776
GSM3428777
GSM3428778
GSM3428779
GSM3428780
GSM3428781
GSM3428782
GSM3428783
GSM3428784
GSM3428785
GSM3428786
GSM3428787
GSM3428788
GSM3428789
GSM3428790
GSM3428791
GSM3428792
GSM3428793
GSM3428794
GSM3428795
GSM3428796
GSM3428797
GSM3428798
GSM3428799
GSM3428800
GSM3428801
GSM3428802
GSM3428803
GSM3428804
GSM3428805
GSM3428806
GSM3428807
GSM3428808
GSM3428809
GSM3428810
GSM3428811
GSM3428812
GSM3428813
GSM3428814
GSM3428815
GSM3428816
GSM3428817
GSM3428818
GSM3428819
GSM3428820
GSM3428821
GSM3428822
geneNames
GSM3428716
GSM3428717
GSM3428718
GSM3428719
GSM3428720
GSM3428721
GSM3428722
GSM3428723
GSM3428724
GSM3428725
GSM3428726
GSM3428727
GSM3428728
GSM3428729
GSM3428730
GSM3428731
GSM3428732
GSM3428733
GSM3428734
GSM3428735
GSM3428736
GSM3428737
GSM3428738
GSM3428739
GSM3428740
GSM3428741
GSM3428742
GSM3428743
GSM3428744
GSM3428745
GSM3428746
GSM3428747
GSM3428748
GSM3428749
GSM3428750
GSM3428751
GSM3428752
GSM3428753
GSM3428754
GSM3428755
GSM3428756
GSM3428757
GSM3428758
GSM3428759
GSM3428760
GSM3428761
GSM3428762
GSM3428763
GSM3428764
GSM3428765
GSM3428766
GSM3428767
GSM3428768
GSM3428769
GSM3428770
GSM3428771
GSM3428772
GSM3428773
GSM3428774
GSM3428775
GSM3428776
GSM3428777
GSM3428778
GSM3428779
GSM3428780
GSM3428781
GSM3428782
GSM3428783
GSM3428784
GSM3428785
GSM3428786
GSM3428787
GSM3428788
GSM3428789
GSM3428790
GSM3428791
GSM3428792
GSM3428793
GSM3428794
GSM3428795
GSM3428796
GSM3428797
GSM3428798
GSM3428799
GSM3428800
GSM3428801
GSM3428802
GSM3428803
GSM3428804
GSM3428805
GSM3428806
GSM3428807
GSM3428808
GSM3428809
GSM3428810
GSM3428811
GSM3428812
GSM3428813
GSM3428814
GSM3428815
GSM3428816
GSM3428817
GSM3428818
GSM3428819
GSM3428820
GSM3428821
GSM3428822
geneNames
GSM3428716
GSM3428717
GSM3428718
GSM3428719
GSM3428720
GSM3428721
GSM3428722
GSM3428723
GSM3428724
GSM3428725
GSM3428726
GSM3428727
GSM3428728
GSM3428729
GSM3428730
GSM3428731
GSM3428732
GSM3428733
GSM3428734
GSM3428735
GSM3428736
GSM3428737
GSM3428738
GSM3428739
GSM3428740
GSM3428741
GSM3428742
GSM3428743
GSM3428744
GSM3428745
GSM3428746
GSM3428747
GSM3428748
GSM3428749
GSM3428750
GSM3428751
GSM3428752
GSM3428753
GSM3428754
GSM3428755
GSM3428756
GSM3428757
GSM3428758
GSM3428759
GSM3428760
GSM3428761
GSM3428762
GSM3428763
GSM3428764
GSM3428765
GSM3428766
GSM3428767
GSM3428768
GSM3428769
GSM3428770
GSM3428771
GSM3428772
GSM3428773
GSM3428774
GSM3428775
GSM3428776
GSM3428777
GSM3428778
GSM3428779
GSM3428780
GSM3428781
GSM3428782
GSM3428783
GSM3428784
GSM3428785
GSM3428786
GSM3428787
GSM3428788
GSM3428789
GSM3428790
GSM3428791
GSM3428792
GSM3428793
GSM3428794
GSM3428795
GSM3428796
GSM3428797
GSM3428798
GSM3428799
GSM3428800
GSM3428801
GSM3428802
GSM3428803
GSM3428804
GSM3428805
GSM3428806
GSM3428807
GSM3428808
GSM3428809
GSM3428810
GSM3428811
GSM3428812
GSM3428813
GSM3428814
GSM3428815
GSM3428816
GSM3428817
GSM3428818
GSM3428819
GSM3428820
GSM3428821
GSM3428822
geneNames
GSM3428716
GSM3428717
GSM3428718
GSM3428719
GSM3428720
GSM3428721
GSM3428722
GSM3428723
GSM3428724
GSM3428725
GSM3428726
GSM3428727
GSM3428728
GSM3428729
GSM3428730
GSM3428731
GSM3428732
GSM3428733
GSM3428734
GSM3428735
GSM3428736
GSM3428737
GSM3428738
GSM3428739
GSM3428740
GSM3428741
GSM3428742
GSM3428743
GSM3428744
GSM3428745
GSM3428746
GSM3428747
GSM3428748
GSM3428749
GSM3428750
GSM3428751
GSM3428752
GSM3428753
GSM3428754
GSM3428755
GSM3428756
GSM3428757
GSM3428758
GSM3428759
GSM3428760
GSM3428761
GSM3428762
GSM3428763
GSM3428764
GSM3428765
GSM3428766
GSM3428767
GSM3428768
GSM3428769
GSM3428770
GSM3428771
GSM3428772
GSM3428773
GSM3428774
GSM3428775
GSM3428776
GSM3428777
GSM3428778
GSM3428779
GSM3428780
GSM3428781
GSM3428782
GSM3428783
GSM3428784
GSM3428785
GSM3428786
GSM3428787
GSM3428788
GSM3428789
GSM3428790
GSM3428791
GSM3428792
GSM3428793
GSM3428794
GSM3428795
GSM3428796
GSM3428797
GSM3428798
GSM3428799
GSM3428800
GSM3428801
GSM3428802
GSM3428803
GSM3428804
GSM3428805
GSM3428806
GSM3428807
GSM3428808
GSM3428809
GSM3428810
GSM3428811
GSM3428812
GSM3428813
GSM3428814
GSM3428815
GSM3428816
GSM3428817
GSM3428818
GSM3428819
GSM3428820
GSM3428821
GSM3428822
geneNames
GSM3428716
GSM3428717
GSM3428718
GSM3428719
GSM3428720
GSM3428721
GSM3428722
GSM3428723
GSM3428724
GSM3428725
GSM3428726
GSM3428727
GSM3428728
GSM3428729
GSM3428730
GSM3428731
GSM3428732
GSM3428733
GSM3428734
GSM3428735
GSM3428736
GSM3428737
GSM3428738
GSM3428739
GSM3428740
GSM3428741
GSM3428742
GSM3428743
GSM3428744
GSM3428745
GSM3428746
GSM3428747
GSM3428748
GSM3428749
GSM3428750
GSM3428751
GSM3428752
GSM3428753
GSM3428754
GSM3428755
GSM3428756
GSM3428757
GSM3428758
GSM3428759
GSM3428760
GSM3428761
GSM3428762
GSM3428763
GSM3428764
GSM3428765
GSM3428766
GSM3428767
GSM3428768
GSM3428769
GSM3428770
GSM3428771
GSM3428772
GSM3428773
GSM3428774
GSM3428775
GSM3428776
GSM3428777
GSM3428778
GSM3428779
GSM3428780
GSM3428781
GSM3428782
GSM3428783
GSM3428784
GSM3428785
GSM3428786
GSM3428787
GSM3428788
GSM3428789
GSM3428790
GSM3428791
GSM3428792
GSM3428793
GSM3428794
GSM3428795
GSM3428796
GSM3428797
GSM3428798
GSM3428799
GSM3428800
GSM3428801
GSM3428802
GSM3428803
GSM3428804
GSM3428805
GSM3428806
GSM3428807
GSM3428808
GSM3428809
GSM3428810
GSM3428811
GSM3428812
GSM3428813
GSM3428814
GSM3428815
GSM3428816
GSM3428817
GSM3428818
GSM3428819
GSM3428820
GSM3428821
GSM3428822
geneNames
GSM3428716
GSM3428717
GSM3428718
GSM3428719
GSM3428720
GSM3428721
GSM3428722
GSM3428723
GSM3428724
GSM3428725
GSM3428726
GSM3428727
GSM3428728
GSM3428729
GSM3428730
GSM3428731
GSM3428732
GSM3428733
GSM3428734
GSM3428735
GSM3428736
GSM3428737
GSM3428738
GSM3428739
GSM3428740
GSM3428741
GSM3428742
GSM3428743
GSM3428744
GSM3428745
GSM3428746
GSM3428747
GSM3428748
GSM3428749
GSM3428750
GSM3428751
GSM3428752
GSM3428753
GSM3428754
GSM3428755
GSM3428756
GSM3428757
GSM3428758
GSM3428759
GSM3428760
GSM3428761
GSM3428762
GSM3428763
GSM3428764
GSM3428765
GSM3428766
GSM3428767
GSM3428768
GSM3428769
GSM3428770
GSM3428771
GSM3428772
GSM3428773
GSM3428774
GSM3428775
GSM3428776
GSM3428777
GSM3428778
GSM3428779
GSM3428780
GSM3428781
GSM3428782
GSM3428783
GSM3428784
GSM3428785
GSM3428786
GSM3428787
GSM3428788
GSM3428789
GSM3428790
GSM3428791
GSM3428792
GSM3428793
GSM3428794
GSM3428795
GSM3428796
GSM3428797
GSM3428798
GSM3428799
GSM3428800
GSM3428801
GSM3428802
GSM3428803
GSM3428804
GSM3428805
GSM3428806
GSM3428807
GSM3428808
GSM3428809
GSM3428810
GSM3428811
GSM3428812
GSM3428813
GSM3428814
GSM3428815
GSM3428816
GSM3428817
GSM3428818
GSM3428819
GSM3428820
GSM3428821
GSM3428822
geneNames
GSM3428716
GSM3428717
GSM3428718
GSM3428719
GSM3428720
GSM3428721
GSM3428722
GSM3428723
GSM3428724
GSM3428725
GSM3428726
GSM3428727
GSM3428728
GSM3428729
GSM3428730
GSM3428731
GSM3428732
GSM3428733
GSM3428734
GSM3428735
GSM3428736
GSM3428737
GSM3428738
GSM3428739
GSM3428740
GSM3428741
GSM3428742
GSM3428743
GSM3428744
GSM3428745
GSM3428746
GSM3428747
GSM3428748
GSM3428749
GSM3428750
GSM3428751
GSM3428752
GSM3428753
GSM3428754
GSM3428755
GSM3428756
GSM3428757
GSM3428758
GSM3428759
GSM3428760
GSM3428761
GSM3428762
GSM3428763
GSM3428764
GSM3428765
GSM3428766
GSM3428767
GSM3428768
GSM3428769
GSM3428770
GSM3428771
GSM3428772
GSM3428773
GSM3428774
GSM3428775
GSM3428776
GSM3428777
GSM3428778
GSM3428779
GSM3428780
GSM3428781
GSM3428782
GSM3428783
GSM3428784
GSM3428785
GSM3428786
GSM3428787
GSM3428788
GSM3428789
GSM3428790
GSM3428791
GSM3428792
GSM3428793
GSM3428794
GSM3428795
GSM3428796
GSM3428797
GSM3428798
GSM3428799
GSM3428800
GSM3428801
GSM3428802
GSM3428803
GSM3428804
GSM3428805
GSM3428806
GSM3428807
GSM3428808
GSM3428809
GSM3428810
GSM3428811
GSM3428812
GSM3428813
GSM3428814
GSM3428815
GSM3428816
GSM3428817
GSM3428818
GSM3428819
GSM3428820
GSM3428821
GSM3428822
geneNames
GSM3428716
GSM3428717
GSM3428718
GSM3428719
GSM3428720
GSM3428721
GSM3428722
GSM3428723
GSM3428724
GSM3428725
GSM3428726
GSM3428727
GSM3428728
GSM3428729
GSM3428730
GSM3428731
GSM3428732
GSM3428733
GSM3428734
GSM3428735
GSM3428736
GSM3428737
GSM3428738
GSM3428739
GSM3428740
GSM3428741
GSM3428742
GSM3428743
GSM3428744
GSM3428745
GSM3428746
GSM3428747
GSM3428748
GSM3428749
GSM3428750
GSM3428751
GSM3428752
GSM3428753
GSM3428754
GSM3428755
GSM3428756
GSM3428757
GSM3428758
GSM3428759
GSM3428760
GSM3428761
GSM3428762
GSM3428763
GSM3428764
GSM3428765
GSM3428766
GSM3428767
GSM3428768
GSM3428769
GSM3428770
GSM3428771
GSM3428772
GSM3428773
GSM3428774
GSM3428775
GSM3428776
GSM3428777
GSM3428778
GSM3428779
GSM3428780
GSM3428781
GSM3428782
GSM3428783
GSM3428784
GSM3428785
GSM3428786
GSM3428787
GSM3428788
GSM3428789
GSM3428790
GSM3428791
GSM3428792
GSM3428793
GSM3428794
GSM3428795
GSM3428796
GSM3428797
GSM3428798
GSM3428799
GSM3428800
GSM3428801
GSM3428802
GSM3428803
GSM3428804
GSM3428805
GSM3428806
GSM3428807
GSM3428808
GSM3428809
GSM3428810
GSM3428811
GSM3428812
GSM3428813
GSM3428814
GSM3428815
GSM3428816
GSM3428817
GSM3428818
GSM3428819
GSM3428820
GSM3428821
GSM3428822
geneNames
GSM3428716
GSM3428717
GSM3428718
GSM3428719
GSM3428720
GSM3428721
GSM3428722
GSM3428723
GSM3428724
GSM3428725
GSM3428726
GSM3428727
GSM3428728
GSM3428729
GSM3428730
GSM3428731
GSM3428732
GSM3428733
GSM3428734
GSM3428735
GSM3428736
GSM3428737
GSM3428738
GSM3428739
GSM3428740
GSM3428741
GSM3428742
GSM3428743
GSM3428744
GSM3428745
GSM3428746
GSM3428747
GSM3428748
GSM3428749
GSM3428750
GSM3428751
GSM3428752
GSM3428753
GSM3428754
GSM3428755
GSM3428756
GSM3428757
GSM3428758
GSM3428759
GSM3428760
GSM3428761
GSM3428762
GSM3428763
GSM3428764
GSM3428765
GSM3428766
GSM3428767
GSM3428768
GSM3428769
GSM3428770
GSM3428771
GSM3428772
GSM3428773
GSM3428774
GSM3428775
GSM3428776
GSM3428777
GSM3428778
GSM3428779
GSM3428780
GSM3428781
GSM3428782
GSM3428783
GSM3428784
GSM3428785
GSM3428786
GSM3428787
GSM3428788
GSM3428789
GSM3428790
GSM3428791
GSM3428792
GSM3428793
GSM3428794
GSM3428795
GSM3428796
GSM3428797
GSM3428798
GSM3428799
GSM3428800
GSM3428801
GSM3428802
GSM3428803
GSM3428804
GSM3428805
GSM3428806
GSM3428807
GSM3428808
GSM3428809
GSM3428810
GSM3428811
GSM3428812
GSM3428813
GSM3428814
GSM3428815
GSM3428816
GSM3428817
GSM3428818
GSM3428819
GSM3428820
GSM3428821
GSM3428822
geneNames
GSM3428716
GSM3428717
GSM3428718
GSM3428719
GSM3428720
GSM3428721
GSM3428722
GSM3428723
GSM3428724
GSM3428725
GSM3428726
GSM3428727
GSM3428728
GSM3428729
GSM3428730
GSM3428731
GSM3428732
GSM3428733
GSM3428734
GSM3428735
GSM3428736
GSM3428737
GSM3428738
GSM3428739
GSM3428740
GSM3428741
GSM3428742
GSM3428743
GSM3428744
GSM3428745
GSM3428746
GSM3428747
GSM3428748
GSM3428749
GSM3428750
GSM3428751
GSM3428752
GSM3428753
GSM3428754
GSM3428755
GSM3428756
GSM3428757
GSM3428758
GSM3428759
GSM3428760
GSM3428761
GSM3428762
GSM3428763
GSM3428764
GSM3428765
GSM3428766
GSM3428767
GSM3428768
GSM3428769
GSM3428770
GSM3428771
GSM3428772
GSM3428773
GSM3428774
GSM3428775
GSM3428776
GSM3428777
GSM3428778
GSM3428779
GSM3428780
GSM3428781
GSM3428782
GSM3428783
GSM3428784
GSM3428785
GSM3428786
GSM3428787
GSM3428788
GSM3428789
GSM3428790
GSM3428791
GSM3428792
GSM3428793
GSM3428794
GSM3428795
GSM3428796
GSM3428797
GSM3428798
GSM3428799
GSM3428800
GSM3428801
GSM3428802
GSM3428803
GSM3428804
GSM3428805
GSM3428806
GSM3428807
GSM3428808
GSM3428809
GSM3428810
GSM3428811
GSM3428812
GSM3428813
GSM3428814
GSM3428815
GSM3428816
GSM3428817
GSM3428818
GSM3428819
GSM3428820
GSM3428821
GSM3428822
geneNames
GSM3428716
GSM3428717
GSM3428718
GSM3428719
GSM3428720
GSM3428721
GSM3428722
GSM3428723
GSM3428724
GSM3428725
GSM3428726
GSM3428727
GSM3428728
GSM3428729
GSM3428730
GSM3428731
GSM3428732
GSM3428733
GSM3428734
GSM3428735
GSM3428736
GSM3428737
GSM3428738
GSM3428739
GSM3428740
GSM3428741
GSM3428742
GSM3428743
GSM3428744
GSM3428745
GSM3428746
GSM3428747
GSM3428748
GSM3428749
GSM3428750
GSM3428751
GSM3428752
GSM3428753
GSM3428754
GSM3428755
GSM3428756
GSM3428757
GSM3428758
GSM3428759
GSM3428760
GSM3428761
GSM3428762
GSM3428763
GSM3428764
GSM3428765
GSM3428766
GSM3428767
GSM3428768
GSM3428769
GSM3428770
GSM3428771
GSM3428772
GSM3428773
GSM3428774
GSM3428775
GSM3428776
GSM3428777
GSM3428778
GSM3428779
GSM3428780
GSM3428781
GSM3428782
GSM3428783
GSM3428784
GSM3428785
GSM3428786
GSM3428787
GSM3428788
GSM3428789
GSM3428790
GSM3428791
GSM3428792
GSM3428793
GSM3428794
GSM3428795
GSM3428796
GSM3428797
GSM3428798
GSM3428799
GSM3428800
GSM3428801
GSM3428802
GSM3428803
GSM3428804
GSM3428805
GSM3428806
GSM3428807
GSM3428808
GSM3428809
GSM3428810
GSM3428811
GSM3428812
GSM3428813
GSM3428814
GSM3428815
GSM3428816
GSM3428817
GSM3428818
GSM3428819
GSM3428820
GSM3428821
GSM3428822
geneNames
GSM3428716
GSM3428717
GSM3428718
GSM3428719
GSM3428720
GSM3428721
GSM3428722
GSM3428723
GSM3428724
GSM3428725
GSM3428726
GSM3428727
GSM3428728
GSM3428729
GSM3428730
GSM3428731
GSM3428732
GSM3428733
GSM3428734
GSM3428735
GSM3428736
GSM3428737
GSM3428738
GSM3428739
GSM3428740
GSM3428741
GSM3428742
GSM3428743
GSM3428744
GSM3428745
GSM3428746
GSM3428747
GSM3428748
GSM3428749
GSM3428750
GSM3428751
GSM3428752
GSM3428753
GSM3428754
GSM3428755
GSM3428756
GSM3428757
GSM3428758
GSM3428759
GSM3428760
GSM3428761
GSM3428762
GSM3428763
GSM3428764
GSM3428765
GSM3428766
GSM3428767
GSM3428768
GSM3428769
GSM3428770
GSM3428771
GSM3428772
GSM3428773
GSM3428774
GSM3428775
GSM3428776
GSM3428777
GSM3428778
GSM3428779
GSM3428780
GSM3428781
GSM3428782
GSM3428783
GSM3428784
GSM3428785
GSM3428786
GSM3428787
GSM3428788
GSM3428789
GSM3428790
GSM3428791
GSM3428792
GSM3428793
GSM3428794
GSM3428795
GSM3428796
GSM3428797
GSM3428798
GSM3428799
GSM3428800
GSM3428801
GSM3428802
GSM3428803
GSM3428804
GSM3428805
GSM3428806
GSM3428807
GSM3428808
GSM3428809
GSM3428810
GSM3428811
GSM3428812
GSM3428813
GSM3428814
GSM3428815
GSM3428816
GSM3428817
GSM3428818
GSM3428819
GSM3428820
GSM3428821
GSM3428822
geneNames
GSM3428716
GSM3428717
GSM3428718
GSM3428719
GSM3428720
GSM3428721
GSM3428722
GSM3428723
GSM3428724
GSM3428725
GSM3428726
GSM3428727
GSM3428728
GSM3428729
GSM3428730
GSM3428731
GSM3428732
GSM3428733
GSM3428734
GSM3428735
GSM3428736
GSM3428737
GSM3428738
GSM3428739
GSM3428740
GSM3428741
GSM3428742
GSM3428743
GSM3428744
GSM3428745
GSM3428746
GSM3428747
GSM3428748
GSM3428749
GSM3428750
GSM3428751
GSM3428752
GSM3428753
GSM3428754
GSM3428755
GSM3428756
GSM3428757
GSM3428758
GSM3428759
GSM3428760
GSM3428761
GSM3428762
GSM3428763
GSM3428764
GSM3428765
GSM3428766
GSM3428767
GSM3428768
GSM3428769
GSM3428770
GSM3428771
GSM3428772
GSM3428773
GSM3428774
GSM3428775
GSM3428776
GSM3428777
GSM3428778
GSM3428779
GSM3428780
GSM3428781
GSM3428782
GSM3428783
GSM3428784
GSM3428785
GSM3428786
GSM3428787
GSM3428788
GSM3428789
GSM3428790
GSM3428791
GSM3428792
GSM3428793
GSM3428794
GSM3428795
GSM3428796
GSM3428797
GSM3428798
GSM3428799
GSM3428800
GSM3428801
GSM3428802
GSM3428803
GSM3428804
GSM3428805
GSM3428806
GSM3428807
GSM3428808
GSM3428809
GSM3428810
GSM3428811
GSM3428812
GSM3428813
GSM3428814
GSM3428815
GSM3428816
GSM3428817
GSM3428818
GSM3428819
GSM3428820
GSM3428821
GSM3428822
geneNames
GSM3428716
GSM3428717
GSM3428718
GSM3428719
GSM3428720
GSM3428721
GSM3428722
GSM3428723
GSM3428724
GSM3428725
GSM3428726
GSM3428727
GSM3428728
GSM3428729
GSM3428730
GSM3428731
GSM3428732
GSM3428733
GSM3428734
GSM3428735
GSM3428736
GSM3428737
GSM3428738
GSM3428739
GSM3428740
GSM3428741
GSM3428742
GSM3428743
GSM3428744
GSM3428745
GSM3428746
GSM3428747
GSM3428748
GSM3428749
GSM3428750
GSM3428751
GSM3428752
GSM3428753
GSM3428754
GSM3428755
GSM3428756
GSM3428757
GSM3428758
GSM3428759
GSM3428760
GSM3428761
GSM3428762
GSM3428763
GSM3428764
GSM3428765
GSM3428766
GSM3428767
GSM3428768
GSM3428769
GSM3428770
GSM3428771
GSM3428772
GSM3428773
GSM3428774
GSM3428775
GSM3428776
GSM3428777
GSM3428778
GSM3428779
GSM3428780
GSM3428781
GSM3428782
GSM3428783
GSM3428784
GSM3428785
GSM3428786
GSM3428787
GSM3428788
GSM3428789
GSM3428790
GSM3428791
GSM3428792
GSM3428793
GSM3428794
GSM3428795
GSM3428796
GSM3428797
GSM3428798
GSM3428799
GSM3428800
GSM3428801
GSM3428802
GSM3428803
GSM3428804
GSM3428805
GSM3428806
GSM3428807
GSM3428808
GSM3428809
GSM3428810
GSM3428811
GSM3428812
GSM3428813
GSM3428814
GSM3428815
GSM3428816
GSM3428817
GSM3428818
GSM3428819
GSM3428820
GSM3428821
GSM3428822
geneNames
GSM3428716
GSM3428717
GSM3428718
GSM3428719
GSM3428720
GSM3428721
GSM3428722
GSM3428723
GSM3428724
GSM3428725
GSM3428726
GSM3428727
GSM3428728
GSM3428729
GSM3428730
GSM3428731
GSM3428732
GSM3428733
GSM3428734
GSM3428735
GSM3428736
GSM3428737
GSM3428738
GSM3428739
GSM3428740
GSM3428741
GSM3428742
GSM3428743
GSM3428744
GSM3428745
GSM3428746
GSM3428747
GSM3428748
GSM3428749
GSM3428750
GSM3428751
GSM3428752
GSM3428753
GSM3428754
GSM3428755
GSM3428756
GSM3428757
GSM3428758
GSM3428759
GSM3428760
GSM3428761
GSM3428762
GSM3428763
GSM3428764
GSM3428765
GSM3428766
GSM3428767
GSM3428768
GSM3428769
GSM3428770
GSM3428771
GSM3428772
GSM3428773
GSM3428774
GSM3428775
GSM3428776
GSM3428777
GSM3428778
GSM3428779
GSM3428780
GSM3428781
GSM3428782
GSM3428783
GSM3428784
GSM3428785
GSM3428786
GSM3428787
GSM3428788
GSM3428789
GSM3428790
GSM3428791
GSM3428792
GSM3428793
GSM3428794
GSM3428795
GSM3428796
GSM3428797
GSM3428798
GSM3428799
GSM3428800
GSM3428801
GSM3428802
GSM3428803
GSM3428804
GSM3428805
GSM3428806
GSM3428807
GSM3428808
GSM3428809
GSM3428810
GSM3428811
GSM3428812
GSM3428813
GSM3428814
GSM3428815
GSM3428816
GSM3428817
GSM3428818
GSM3428819
GSM3428820
GSM3428821
GSM3428822
geneNames
GSM3428716
GSM3428717
GSM3428718
GSM3428719
GSM3428720
GSM3428721
GSM3428722
GSM3428723
GSM3428724
GSM3428725
GSM3428726
GSM3428727
GSM3428728
GSM3428729
GSM3428730
GSM3428731
GSM3428732
GSM3428733
GSM3428734
GSM3428735
GSM3428736
GSM3428737
GSM3428738
GSM3428739
GSM3428740
GSM3428741
GSM3428742
GSM3428743
GSM3428744
GSM3428745
GSM3428746
GSM3428747
GSM3428748
GSM3428749
GSM3428750
GSM3428751
GSM3428752
GSM3428753
GSM3428754
GSM3428755
GSM3428756
GSM3428757
GSM3428758
GSM3428759
GSM3428760
GSM3428761
GSM3428762
GSM3428763
GSM3428764
GSM3428765
GSM3428766
GSM3428767
GSM3428768
GSM3428769
GSM3428770
GSM3428771
GSM3428772
GSM3428773
GSM3428774
GSM3428775
GSM3428776
GSM3428777
GSM3428778
GSM3428779
GSM3428780
GSM3428781
GSM3428782
GSM3428783
GSM3428784
GSM3428785
GSM3428786
GSM3428787
GSM3428788
GSM3428789
GSM3428790
GSM3428791
GSM3428792
GSM3428793
GSM3428794
GSM3428795
GSM3428796
GSM3428797
GSM3428798
GSM3428799
GSM3428800
GSM3428801
GSM3428802
GSM3428803
GSM3428804
GSM3428805
GSM3428806
GSM3428807
GSM3428808
GSM3428809
GSM3428810
GSM3428811
GSM3428812
GSM3428813
GSM3428814
GSM3428815
GSM3428816
GSM3428817
GSM3428818
GSM3428819
GSM3428820
GSM3428821
GSM3428822
geneNames
GSM3428716
GSM3428717
GSM3428718
GSM3428719
GSM3428720
GSM3428721
GSM3428722
GSM3428723
GSM3428724
GSM3428725
GSM3428726
GSM3428727
GSM3428728
GSM3428729
GSM3428730
GSM3428731
GSM3428732
GSM3428733
GSM3428734
GSM3428735
GSM3428736
GSM3428737
GSM3428738
GSM3428739
GSM3428740
GSM3428741
GSM3428742
GSM3428743
GSM3428744
GSM3428745
GSM3428746
GSM3428747
GSM3428748
GSM3428749
GSM3428750
GSM3428751
GSM3428752
GSM3428753
GSM3428754
GSM3428755
GSM3428756
GSM3428757
GSM3428758
GSM3428759
GSM3428760
GSM3428761
GSM3428762
GSM3428763
GSM3428764
GSM3428765
GSM3428766
GSM3428767
GSM3428768
GSM3428769
GSM3428770
GSM3428771
GSM3428772
GSM3428773
GSM3428774
GSM3428775
GSM3428776
GSM3428777
GSM3428778
GSM3428779
GSM3428780
GSM3428781
GSM3428782
GSM3428783
GSM3428784
GSM3428785
GSM3428786
GSM3428787
GSM3428788
GSM3428789
GSM3428790
GSM3428791
GSM3428792
GSM3428793
GSM3428794
GSM3428795
GSM3428796
GSM3428797
GSM3428798
GSM3428799
GSM3428800
GSM3428801
GSM3428802
GSM3428803
GSM3428804
GSM3428805
GSM3428806
GSM3428807
GSM3428808
GSM3428809
GSM3428810
GSM3428811
GSM3428812
GSM3428813
GSM3428814
GSM3428815
GSM3428816
GSM3428817
GSM3428818
GSM3428819
GSM3428820
GSM3428821
GSM3428822
geneNames
GSM3428716
GSM3428717
GSM3428718
GSM3428719
GSM3428720
GSM3428721
GSM3428722
GSM3428723
GSM3428724
GSM3428725
GSM3428726
GSM3428727
GSM3428728
GSM3428729
GSM3428730
GSM3428731
GSM3428732
GSM3428733
GSM3428734
GSM3428735
GSM3428736
GSM3428737
GSM3428738
GSM3428739
GSM3428740
GSM3428741
GSM3428742
GSM3428743
GSM3428744
GSM3428745
GSM3428746
GSM3428747
GSM3428748
GSM3428749
GSM3428750
GSM3428751
GSM3428752
GSM3428753
GSM3428754
GSM3428755
GSM3428756
GSM3428757
GSM3428758
GSM3428759
GSM3428760
GSM3428761
GSM3428762
GSM3428763
GSM3428764
GSM3428765
GSM3428766
GSM3428767
GSM3428768
GSM3428769
GSM3428770
[truncated: 4,912 more rows]
