# Supplementary material for: Study of TRAF3IP3 for prognosis and immune infiltration in hepatocellular carcinoma
Source: PeerJ. 2024 Dec 12;12:e18538. doi: 10.7717/peerj.18538 (PMC11646420; doi:10.7717/peerj.18538)
Supplement: Supplemental Information 10 [file peerj-12-18538-s010.xlsx]

## Sheet: Sheet1
gene	lowMean	highMean	logFC	pValue	fdr
ARHGAP15	52.6467	145.025	1.46188	3.38742e-05	0.00542456
ARHGAP30	75.4476	168.913	1.16273	7.431e-05	0.00841044
ARHGDIB	355.709	821.867	1.20821	0.000360991	0.0209
C17orf87	101.157	238.463	1.23717	0.000337361	0.0199933
CCL5	135.085	420.514	1.63828	3.19949e-06	0.00172007
CCR7	72.6687	152.159	1.06618	3.67165e-05	0.00575722
CD3D	48.178	140.418	1.54329	3.86045e-06	0.00193705
CD3E	38.1937	77.5286	1.02139	1.00935e-07	0.00025323
CD3G	48.8785	117.089	1.26034	1.13862e-05	0.00317401
CD48	153.291	527.72	1.7835	2.65276e-05	0.00492987
CD53	297.856	701.022	1.23485	0.000537634	0.0260225
CD8A	30.9585	94.3623	1.60788	1.13862e-05	0.00317401
CD96	57.2658	155.347	1.43975	2.78623e-07	0.000466012
CECR1	245.429	553.742	1.17391	0.000537634	0.0260225
CELF2	71.549	151.748	1.08468	4.66289e-05	0.00643949
CLEC2D	44.0534	94.7873	1.10544	0.000167819	0.0137292
CORO1A	110.85	433.003	1.96577	1.47546e-06	0.00111051
CX3CR1	33.3143	81.222	1.28573	0.000503568	0.0253519
DOCK8	51.7279	113.385	1.13221	0.000741749	0.0310154
EMP3	63.6742	146.166	1.19882	0.00154894	0.0461707
EVI2B	120.859	370.754	1.61714	0.000471486	0.0239773
FCN1	95.0635	461.663	2.27988	0.000841535	0.0336011
FYB	128.249	352.231	1.45757	0.000274723	0.0177485
FYN	149.598	344.569	1.2037	1.90233e-05	0.00447435
GBP5	59.317	182.761	1.62344	0.000145254	0.0124233
GIMAP4	117.692	261.744	1.15314	5.04503e-05	0.00690389
GIMAP7	100.062	200.885	1.00547	1.13862e-05	0.00317401
GPR171	62.5495	163.76	1.38851	0.000239106	0.0160681
GPR174	30.7751	66.8853	1.11993	8.05169e-07	0.000757513
GPR65	48.6978	110.944	1.18791	0.000125518	0.0112466
GZMA	99.4451	332.877	1.74302	2.44288e-05	0.00492987
GZMB	31.6051	71.7571	1.18297	0.00101425	0.0369672
GZMH	33.1766	163.742	2.30319	1.35375e-05	0.00351344
GZMK	32.1215	82.4477	1.35994	8.019e-05	0.00894148
HLA-DMB	214.886	448.225	1.06065	0.000696012	0.0298492
IDO1	49.9071	108.233	1.11683	0.000696012	0.0298492
IGHA1	164.948	561.516	1.76732	4.30777e-05	0.00623508
IGJ	260.804	1138.89	2.12658	0.000135053	0.0118195
IGLV1-44	46.7631	149.484	1.67655	0.000696012	0.0298492
IKZF1	98.7956	207.408	1.06995	0.000207781	0.0151098
IKZF3	53.3448	196.952	1.88442	2.87932e-05	0.0050991
IL23A	119.698	360.435	1.59034	8.05169e-07	0.000757513
IL24	41.1707	104.428	1.34282	6.37296e-05	0.00799435
IL2RB	41.3028	105.247	1.34947	3.97791e-05	0.00598794
IL2RG	165.307	369.285	1.15958	0.000573794	0.0270762
IL7R	76.7491	257.082	1.744	0.000207781	0.0151098
ITGB2	322.707	793.496	1.298	0.00129455	0.0423627
ITK	58.706	160.249	1.44874	2.65276e-05	0.00492987
ITM2A	70.9806	174.914	1.30115	1.04346e-05	0.00307983
KCNA3	39.0295	109.793	1.49214	3.97791e-05	0.00598794
KLRB1	56.5674	129.404	1.19384	1.475e-05	0.00376326
KLRK1	55.1563	227.646	2.0452	7.431e-05	0.00841044
LAPTM4B	1206.11	575.239	-1.06813	0.000741749	0.0310154
LCP1	572.892	1314.2	1.19785	0.00107861	0.038024
LCP2	65.2216	131.941	1.01648	0.000337361	0.0199933
MS4A1	25.7858	74.8566	1.53755	0.000294303	0.0184589
NKG7	80.7104	209.994	1.37952	0.000612163	0.0276723
PCOLCE2	154.576	63.4504	-1.28461	0.00038613	0.021448
PLEK	157.757	343.305	1.12179	0.00145952	0.0449288
PRKCB	50.1727	140.404	1.48461	5.89801e-05	0.00758827
PRKCH	98.2759	200.202	1.02655	4.30777e-05	0.00623508
PTPN22	34.1612	98.5153	1.52799	0.000116608	0.0108352
PTPRC	84.3999	276.74	1.71322	0.000125518	0.0112466
RAC2	77.2707	316.771	2.03545	5.58332e-06	0.00215502
SKAP1	76.9182	158.331	1.04154	0.000207781	0.0151098
SLAMF7	51.3857	114.829	1.16005	5.09544e-06	0.00207302
TAGAP	61.8514	132.026	1.09394	0.00129455	0.0423627
TRAF3IP3	41.6458	90.655	1.12221	1.33035e-16	2.00258e-12
TRAT1	25.1952	76.966	1.61107	1.093e-06	0.000914048
TRBC1	162.174	748.285	2.20604	1.981e-06	0.00135545
TRD@	78.2817	167.378	1.09636	2.49629e-07	0.000466012
