# Supplementary material for: Study of TRAF3IP3 for prognosis and immune infiltration in hepatocellular carcinoma
Source: PeerJ. 2024 Dec 12;12:e18538. doi: 10.7717/peerj.18538 (PMC11646420; doi:10.7717/peerj.18538)
Supplement: Supplemental Information 11 [file peerj-12-18538-s011.xlsx]

## Sheet: Sheet1
ONTOLOGY	ID	Description	GeneRatio	BgRatio	pvalue	p.adjust	qvalue	geneID	Count
BP	GO:0042110	T cell activation	20/63	487/18723	6.55095e-17	9.53819e-14	6.40614e-14	CCL5/CCR7/CD3D/CD3E/CD3G/CD48/CD8A/CORO1A/DOCK8/FYN/HLA-DMB/IL23A/IL7R/ITK/KLRK1/LCP1/PTPN22/PTPRC/RAC2/SLAMF7	20
BP	GO:0002429	immune response-activating cell surface receptor signaling pathway	15/63	291/18723	3.25358e-14	1.37913e-11	9.26265e-12	CCR7/CD3E/FCN1/FYN/IGHA1/ITK/LCP2/MS4A1/PRKCB/PRKCH/PTPN22/PTPRC/SKAP1/TRAT1/TRBC1	15
BP	GO:0002757	immune response-activating signal transduction	15/63	291/18723	3.25358e-14	1.37913e-11	9.26265e-12	CCR7/CD3E/FCN1/FYN/IGHA1/ITK/LCP2/MS4A1/PRKCB/PRKCH/PTPN22/PTPRC/SKAP1/TRAT1/TRBC1	15
BP	GO:1903039	positive regulation of leukocyte cell-cell adhesion	14/63	239/18723	4.47077e-14	1.37913e-11	9.26265e-12	CCL5/CCR7/CD3E/CORO1A/DOCK8/FYN/HLA-DMB/IL23A/IL7R/ITGB2/KLRK1/PTPN22/PTPRC/SKAP1	14
BP	GO:0050851	antigen receptor-mediated signaling pathway	14/63	240/18723	4.73602e-14	1.37913e-11	9.26265e-12	CCR7/CD3E/FYN/IGHA1/ITK/LCP2/MS4A1/PRKCB/PRKCH/PTPN22/PTPRC/SKAP1/TRAT1/TRBC1	14
BP	GO:0007159	leukocyte cell-cell adhesion	16/63	371/18723	6.43431e-14	1.56139e-11	1.04868e-11	CCL5/CCR7/CD3E/CORO1A/CX3CR1/DOCK8/FYN/HLA-DMB/IL23A/IL7R/ITGB2/KLRK1/PTPN22/PTPRC/RAC2/SKAP1	16
BP	GO:0002768	immune response-regulating cell surface receptor signaling pathway	15/63	315/18723	1.03649e-13	2.15589e-11	1.44796e-11	CCR7/CD3E/FCN1/FYN/IGHA1/ITK/LCP2/MS4A1/PRKCB/PRKCH/PTPN22/PTPRC/SKAP1/TRAT1/TRBC1	15
BP	GO:0050867	positive regulation of cell activation	16/63	420/18723	4.32663e-13	7.70978e-11	5.17812e-11	CCL5/CCR7/CD3E/CORO1A/DOCK8/FYN/HLA-DMB/IGHA1/IL23A/IL7R/ITGB2/KLRK1/PLEK/PTPN22/PTPRC/TRBC1	16
BP	GO:0022409	positive regulation of cell-cell adhesion	14/63	284/18723	4.76566e-13	7.70978e-11	5.17812e-11	CCL5/CCR7/CD3E/CORO1A/DOCK8/FYN/HLA-DMB/IL23A/IL7R/ITGB2/KLRK1/PTPN22/PTPRC/SKAP1	14
BP	GO:0002253	activation of immune response	15/63	375/18723	1.29304e-12	1.88267e-10	1.26446e-10	CCR7/CD3E/FCN1/FYN/IGHA1/ITK/LCP2/MS4A1/PRKCB/PRKCH/PTPN22/PTPRC/SKAP1/TRAT1/TRBC1	15
BP	GO:0002696	positive regulation of leukocyte activation	15/63	409/18723	4.47973e-12	5.63216e-10	3.78273e-10	CCL5/CCR7/CD3E/CORO1A/DOCK8/FYN/HLA-DMB/IGHA1/IL23A/IL7R/ITGB2/KLRK1/PTPN22/PTPRC/TRBC1	15
BP	GO:1903037	regulation of leukocyte cell-cell adhesion	14/63	336/18723	4.64189e-12	5.63216e-10	3.78273e-10	CCL5/CCR7/CD3E/CORO1A/DOCK8/FYN/HLA-DMB/IL23A/IL7R/ITGB2/KLRK1/PTPN22/PTPRC/SKAP1	14
BP	GO:0050870	positive regulation of T cell activation	12/63	216/18723	6.51085e-12	7.29215e-10	4.89763e-10	CCL5/CCR7/CD3E/CORO1A/DOCK8/FYN/HLA-DMB/IL23A/IL7R/KLRK1/PTPN22/PTPRC	12
BP	GO:0046651	lymphocyte proliferation	13/63	288/18723	1.08472e-11	1.08387e-09	7.27964e-10	CCL5/CD3E/CORO1A/DOCK8/FYN/HLA-DMB/IKZF3/IL23A/IL7R/MS4A1/PTPN22/PTPRC/RAC2	13
BP	GO:0032943	mononuclear cell proliferation	13/63	291/18723	1.23538e-11	1.08387e-09	7.27964e-10	CCL5/CD3E/CORO1A/DOCK8/FYN/HLA-DMB/IKZF3/IL23A/IL7R/MS4A1/PTPN22/PTPRC/RAC2	13
BP	GO:0051251	positive regulation of lymphocyte activation	14/63	362/18723	1.2605e-11	1.08387e-09	7.27964e-10	CCL5/CCR7/CD3E/CORO1A/DOCK8/FYN/HLA-DMB/IGHA1/IL23A/IL7R/KLRK1/PTPN22/PTPRC/TRBC1	14
BP	GO:0002443	leukocyte mediated immunity	15/63	440/18723	1.26551e-11	1.08387e-09	7.27964e-10	CD8A/CD96/CORO1A/CX3CR1/GZMB/HLA-DMB/IGHA1/IL23A/IL7R/ITGB2/KLRK1/PTPRC/RAC2/SLAMF7/TRBC1	15
BP	GO:0030098	lymphocyte differentiation	14/63	374/18723	1.94753e-11	1.57533e-09	1.05804e-09	CCR7/CD3D/CD3E/CD3G/CD8A/IKZF1/IKZF3/IL23A/IL7R/ITK/ITM2A/MS4A1/PTPN22/PTPRC	14
BP	GO:0002764	immune response-regulating signaling pathway	15/63	468/18723	3.02476e-11	2.31792e-09	1.55679e-09	CCR7/CD3E/FCN1/FYN/IGHA1/ITK/LCP2/MS4A1/PRKCB/PRKCH/PTPN22/PTPRC/SKAP1/TRAT1/TRBC1	15
BP	GO:0070661	leukocyte proliferation	13/63	318/18723	3.74509e-11	2.72643e-09	1.83115e-09	CCL5/CD3E/CORO1A/DOCK8/FYN/HLA-DMB/IKZF3/IL23A/IL7R/MS4A1/PTPN22/PTPRC/RAC2	13
BP	GO:0050863	regulation of T cell activation	13/63	329/18723	5.71621e-11	3.96324e-09	2.66183e-09	CCL5/CCR7/CD3E/CORO1A/DOCK8/FYN/HLA-DMB/IL23A/IL7R/KLRK1/PTPN22/PTPRC/RAC2	13
BP	GO:1903131	mononuclear cell differentiation	14/63	426/18723	1.09172e-10	7.22522e-09	4.85268e-09	CCR7/CD3D/CD3E/CD3G/CD8A/IKZF1/IKZF3/IL23A/IL7R/ITK/ITM2A/MS4A1/PTPN22/PTPRC	14
BP	GO:0045785	positive regulation of cell adhesion	14/63	437/18723	1.52623e-10	9.66173e-09	6.48912e-09	CCL5/CCR7/CD3E/CORO1A/DOCK8/FYN/HLA-DMB/IL23A/IL7R/ITGB2/KLRK1/PTPN22/PTPRC/SKAP1	14
BP	GO:0022407	regulation of cell-cell adhesion	14/63	448/18723	2.11424e-10	1.28264e-08	8.61458e-09	CCL5/CCR7/CD3E/CORO1A/DOCK8/FYN/HLA-DMB/IL23A/IL7R/ITGB2/KLRK1/PTPN22/PTPRC/SKAP1	14
BP	GO:0050852	T cell receptor signaling pathway	9/63	123/18723	2.97655e-10	1.73354e-08	1.1643e-08	CCR7/CD3E/FYN/ITK/LCP2/PTPN22/PTPRC/SKAP1/TRAT1	9
BP	GO:0042098	T cell proliferation	10/63	199/18723	1.14924e-09	6.43575e-08	4.32245e-08	CCL5/CD3E/CORO1A/DOCK8/FYN/HLA-DMB/IL23A/PTPN22/PTPRC/RAC2	10
BP	GO:0002449	lymphocyte mediated immunity	12/63	350/18723	1.71146e-09	9.22922e-08	6.19863e-08	CD8A/CD96/CORO1A/GZMB/HLA-DMB/IGHA1/IL23A/IL7R/KLRK1/PTPRC/SLAMF7/TRBC1	12
BP	GO:0001909	leukocyte mediated cytotoxicity	8/63	124/18723	8.4152e-09	4.3759e-07	2.93899e-07	CORO1A/CX3CR1/GZMB/IL23A/IL7R/KLRK1/PTPRC/SLAMF7	8
BP	GO:0045061	thymic T cell selection	5/63	22/18723	9.24384e-09	4.64104e-07	3.11707e-07	CCR7/CD3D/CD3E/CD3G/PTPRC	5
BP	GO:0050853	B cell receptor signaling pathway	8/63	131/18723	1.29823e-08	6.30074e-07	4.23177e-07	IGHA1/ITK/MS4A1/PRKCB/PRKCH/PTPN22/PTPRC/TRBC1	8
BP	GO:0030217	T cell differentiation	10/63	257/18723	1.34495e-08	6.31695e-07	4.24266e-07	CCR7/CD3D/CD3E/CD3G/CD8A/IL23A/IL7R/ITK/PTPN22/PTPRC	10
BP	GO:0045058	T cell selection	6/63	50/18723	1.60989e-08	7.32498e-07	4.91968e-07	CCR7/CD3D/CD3E/CD3G/IL23A/PTPRC	6
BP	GO:0050857	positive regulation of antigen receptor-mediated signaling pathway	5/63	26/18723	2.28528e-08	1.0083e-06	6.77202e-07	CCR7/PRKCB/PRKCH/PTPRC/TRAT1	5
BP	GO:0042102	positive regulation of T cell proliferation	7/63	101/18723	4.65266e-08	1.99243e-06	1.33818e-06	CCL5/CD3E/CORO1A/HLA-DMB/IL23A/PTPN22/PTPRC	7
BP	GO:0050670	regulation of lymphocyte proliferation	9/63	225/18723	6.00318e-08	2.49732e-06	1.67728e-06	CCL5/CD3E/CORO1A/HLA-DMB/IKZF3/IL23A/PTPN22/PTPRC/RAC2	9
BP	GO:0032944	regulation of mononuclear cell proliferation	9/63	227/18723	6.47636e-08	2.61832e-06	1.75854e-06	CCL5/CD3E/CORO1A/HLA-DMB/IKZF3/IL23A/PTPN22/PTPRC/RAC2	9
BP	GO:0050854	regulation of antigen receptor-mediated signaling pathway	6/63	63/18723	6.65369e-08	2.61832e-06	1.75854e-06	CCR7/PRKCB/PRKCH/PTPN22/PTPRC/TRAT1	6
BP	GO:0006909	phagocytosis	10/63	308/18723	7.41751e-08	2.84208e-06	1.90883e-06	CORO1A/FCN1/FYN/IGHA1/IL2RB/IL2RG/ITGB2/PTPRC/RAC2/TRBC1	10
BP	GO:0042129	regulation of T cell proliferation	8/63	171/18723	1.03775e-07	3.87428e-06	2.60208e-06	CCL5/CD3E/CORO1A/HLA-DMB/IL23A/PTPN22/PTPRC/RAC2	8
BP	GO:0045059	positive thymic T cell selection	4/63	14/18723	1.13586e-07	4.13452e-06	2.77687e-06	CD3D/CD3E/CD3G/PTPRC	4
BP	GO:0070663	regulation of leukocyte proliferation	9/63	245/18723	1.24267e-07	4.41298e-06	2.96389e-06	CCL5/CD3E/CORO1A/HLA-DMB/IKZF3/IL23A/PTPN22/PTPRC/RAC2	9
BP	GO:0043368	positive T cell selection	5/63	37/18723	1.47193e-07	5.1027e-06	3.42713e-06	CD3D/CD3E/CD3G/IL23A/PTPRC	5
BP	GO:0002697	regulation of immune effector process	10/63	339/18723	1.80998e-07	6.12869e-06	4.11622e-06	CD96/CX3CR1/HLA-DMB/IL23A/IL7R/ITGB2/KLRK1/PTPN22/PTPRC/RAC2	10
BP	GO:0033077	T cell differentiation in thymus	6/63	75/18723	1.911e-07	6.32367e-06	4.24717e-06	CCR7/CD3D/CD3E/CD3G/IL7R/PTPRC	6
BP	GO:0001906	cell killing	8/63	188/18723	2.15103e-07	6.95977e-06	4.6744e-06	CORO1A/CX3CR1/GZMB/IL23A/IL7R/KLRK1/PTPRC/SLAMF7	8
BP	GO:2000106	regulation of leukocyte apoptotic process	6/63	81/18723	3.03215e-07	9.5974e-06	6.44591e-06	CCL5/CCR7/CD3G/DOCK8/IDO1/IL7R	6
BP	GO:0002366	leukocyte activation involved in immune response	9/63	275/18723	3.30306e-07	1.02325e-05	6.87244e-06	CORO1A/CX3CR1/HLA-DMB/IL23A/ITGB2/ITM2A/LCP1/PTPRC/RAC2	9
BP	GO:0002263	cell activation involved in immune response	9/63	279/18723	3.7295e-07	1.12488e-05	7.55503e-06	CORO1A/CX3CR1/HLA-DMB/IL23A/ITGB2/ITM2A/LCP1/PTPRC/RAC2	9
BP	GO:0050671	positive regulation of lymphocyte proliferation	7/63	137/18723	3.78565e-07	1.12488e-05	7.55503e-06	CCL5/CD3E/CORO1A/HLA-DMB/IL23A/PTPN22/PTPRC	7
BP	GO:0032946	positive regulation of mononuclear cell proliferation	7/63	138/18723	3.97749e-07	1.15824e-05	7.77913e-06	CCL5/CD3E/CORO1A/HLA-DMB/IL23A/PTPN22/PTPRC	7
BP	GO:0030101	natural killer cell activation	6/63	88/18723	4.97148e-07	1.41931e-05	9.53252e-06	CORO1A/IL23A/KLRK1/PTPN22/PTPRC/SLAMF7	6
BP	GO:0046641	positive regulation of alpha-beta T cell proliferation	4/63	21/18723	6.67243e-07	1.86828e-05	1.2548e-05	CD3E/IL23A/PTPN22/PTPRC	4
BP	GO:0070665	positive regulation of leukocyte proliferation	7/63	150/18723	6.99643e-07	1.92204e-05	1.2909e-05	CCL5/CD3E/CORO1A/HLA-DMB/IL23A/PTPN22/PTPRC	7
BP	GO:0002703	regulation of leukocyte mediated immunity	8/63	226/18723	8.71196e-07	2.349e-05	1.57766e-05	CD96/CX3CR1/IL23A/IL7R/ITGB2/KLRK1/PTPRC/RAC2	8
BP	GO:0070228	regulation of lymphocyte apoptotic process	5/63	54/18723	1.02204e-06	2.70563e-05	1.81718e-05	CCL5/CD3G/DOCK8/IDO1/IL7R	5
BP	GO:0071887	leukocyte apoptotic process	6/63	106/18723	1.49307e-06	3.88199e-05	2.60727e-05	CCL5/CCR7/CD3G/DOCK8/IDO1/IL7R	6
BP	GO:0006874	cellular calcium ion homeostasis	10/63	448/18723	2.28812e-06	5.84475e-05	3.92552e-05	CCL5/CCR7/CORO1A/CX3CR1/FYN/GPR174/GPR65/MS4A1/PRKCB/PTPRC	10
BP	GO:0055074	calcium ion homeostasis	10/63	460/18723	2.89631e-06	7.27074e-05	4.88326e-05	CCL5/CCR7/CORO1A/CX3CR1/FYN/GPR174/GPR65/MS4A1/PRKCB/PTPRC	10
BP	GO:0050900	leukocyte migration	9/63	369/18723	3.76776e-06	9.29807e-05	6.24487e-05	CCL5/CCR7/CORO1A/CX3CR1/DOCK8/FYN/ITGB2/KLRK1/RAC2	9
BP	GO:0002228	natural killer cell mediated immunity	5/63	71/18723	4.02707e-06	9.77235e-05	6.56341e-05	CD96/CORO1A/GZMB/KLRK1/SLAMF7	5
BP	GO:0070227	lymphocyte apoptotic process	5/63	72/18723	4.31644e-06	0.000103028	6.91971e-05	CCL5/CD3G/DOCK8/IDO1/IL7R	5
BP	GO:0072503	cellular divalent inorganic cation homeostasis	10/63	486/18723	4.71502e-06	0.000110727	7.43676e-05	CCL5/CCR7/CORO1A/CX3CR1/FYN/GPR174/GPR65/MS4A1/PRKCB/PTPRC	10
BP	GO:0070232	regulation of T cell apoptotic process	4/63	34/18723	5.00357e-06	0.000115638	7.76661e-05	CCL5/DOCK8/IDO1/IL7R	4
BP	GO:0046640	regulation of alpha-beta T cell proliferation	4/63	35/18723	5.63497e-06	0.000128196	8.61001e-05	CD3E/IL23A/PTPN22/PTPRC	4
BP	GO:0033632	regulation of cell-cell adhesion mediated by integrin	3/63	11/18723	5.87666e-06	0.000129643	8.70721e-05	CCL5/CD3E/SKAP1	3
BP	GO:0045060	negative thymic T cell selection	3/63	11/18723	5.87666e-06	0.000129643	8.70721e-05	CCR7/CD3E/PTPRC	3
BP	GO:0043383	negative T cell selection	3/63	12/18723	7.81673e-06	0.000168813	0.00011338	CCR7/CD3E/PTPRC	3
BP	GO:0046633	alpha-beta T cell proliferation	4/63	38/18723	7.88413e-06	0.000168813	0.00011338	CD3E/IL23A/PTPN22/PTPRC	4
BP	GO:0001910	regulation of leukocyte mediated cytotoxicity	5/63	82/18723	8.20323e-06	0.0001731	0.000116259	CX3CR1/IL23A/IL7R/KLRK1/PTPRC	5
BP	GO:0045088	regulation of innate immune response	7/63	218/18723	8.38316e-06	0.00017437	0.000117112	CCL5/CD96/FCN1/FYN/GBP5/KLRK1/PTPN22	7
BP	GO:0007204	positive regulation of cytosolic calcium ion concentration	8/63	319/18723	1.11573e-05	0.000228803	0.000153671	CCR7/CORO1A/CX3CR1/FYN/GPR174/GPR65/MS4A1/PTPRC	8
BP	GO:0030595	leukocyte chemotaxis	7/63	230/18723	1.18813e-05	0.000240265	0.00016137	CCL5/CCR7/CORO1A/CX3CR1/ITGB2/KLRK1/RAC2	7
BP	GO:0032103	positive regulation of response to external stimulus	9/63	427/18723	1.2205e-05	0.000243431	0.000163496	CCL5/CCR7/CX3CR1/FCN1/FYN/GBP5/IL23A/KLRK1/RAC2	9
BP	GO:0002831	regulation of response to biotic stimulus	8/63	327/18723	1.33487e-05	0.000262645	0.0001764	CCL5/CD96/FCN1/FYN/GBP5/IL23A/KLRK1/PTPN22	8
BP	GO:0002699	positive regulation of immune effector process	7/63	235/18723	1.36586e-05	0.000265159	0.000178089	HLA-DMB/IL23A/ITGB2/KLRK1/PTPN22/PTPRC/RAC2	7
BP	GO:0031295	T cell costimulation	4/63	44/18723	1.4282e-05	0.000273613	0.000183767	CCR7/CD3E/FYN/KLRK1	4
BP	GO:0042113	B cell activation	8/63	334/18723	1.55538e-05	0.000294109	0.000197532	IGHA1/IKZF3/IL7R/ITM2A/MS4A1/PRKCB/PTPRC/TRBC1	8
BP	GO:0031294	lymphocyte costimulation	4/63	46/18723	1.7082e-05	0.000314827	0.000211448	CCR7/CD3E/FYN/KLRK1	4
BP	GO:2000107	negative regulation of leukocyte apoptotic process	4/63	46/18723	1.7082e-05	0.000314827	0.000211448	CCL5/CCR7/DOCK8/IL7R	4
BP	GO:0033631	cell-cell adhesion mediated by integrin	3/63	16/18723	1.97067e-05	0.000358663	0.000240889	CCL5/CD3E/SKAP1	3
BP	GO:0031341	regulation of cell killing	5/63	99/18723	2.05808e-05	0.000369947	0.000248468	CX3CR1/IL23A/IL7R/KLRK1/PTPRC	5
BP	GO:0051480	regulation of cytosolic calcium ion concentration	8/63	353/18723	2.31409e-05	0.000410892	0.000275968	CCR7/CORO1A/CX3CR1/FYN/GPR174/GPR65/MS4A1/PTPRC	8
BP	GO:0070231	T cell apoptotic process	4/63	50/18723	2.38659e-05	0.00041866	0.000281185	CCL5/DOCK8/IDO1/IL7R	4
BP	GO:0050730	regulation of peptidyl-tyrosine phosphorylation	7/63	264/18723	2.88709e-05	0.000500428	0.000336103	CCL5/CD3E/FYN/IL23A/IL24/ITGB2/PTPRC	7
BP	GO:0097696	receptor signaling pathway via STAT	6/63	181/18723	3.23215e-05	0.000553648	0.000371847	CCL5/FYN/IL23A/IL24/IL7R/PTPRC	6
BP	GO:0070233	negative regulation of T cell apoptotic process	3/63	19/18723	3.38548e-05	0.00057317	0.000384959	CCL5/DOCK8/IL7R	3
BP	GO:0018108	peptidyl-tyrosine phosphorylation	8/63	375/18723	3.55946e-05	0.000595698	0.000400089	CCL5/CD3E/FYN/IL23A/IL24/ITGB2/ITK/PTPRC	8
BP	GO:0032609	interferon-gamma production	5/63	112/18723	3.73307e-05	0.000609292	0.000409219	CCR7/CD3E/CD96/IL23A/PTPN22	5
BP	GO:0032649	regulation of interferon-gamma production	5/63	112/18723	3.73307e-05	0.000609292	0.000409219	CCR7/CD3E/CD96/IL23A/PTPN22	5
BP	GO:0018212	peptidyl-tyrosine modification	8/63	378/18723	3.76623e-05	0.000609292	0.000409219	CCL5/CD3E/FYN/IL23A/IL24/ITGB2/ITK/PTPRC	8
BP	GO:0031349	positive regulation of defense response	7/63	278/18723	4.01204e-05	0.000641926	0.000431137	CCL5/CCR7/FCN1/FYN/GBP5/IL23A/KLRK1	7
BP	GO:1904892	regulation of receptor signaling pathway via STAT	5/63	114/18723	4.06407e-05	0.000643183	0.000431982	CCL5/IL23A/IL24/IL7R/PTPRC	5
BP	GO:0071675	regulation of mononuclear cell migration	5/63	115/18723	4.23787e-05	0.000663477	0.000445611	CCL5/CCR7/CX3CR1/DOCK8/KLRK1	5
BP	GO:0033630	positive regulation of cell adhesion mediated by integrin	3/63	21/18723	4.62447e-05	0.000709398	0.000476453	CCL5/CD3E/SKAP1	3
BP	GO:0050731	positive regulation of peptidyl-tyrosine phosphorylation	6/63	193/18723	4.62862e-05	0.000709398	0.000476453	CCL5/CD3E/FYN/IL23A/IL24/PTPRC	6
BP	GO:0002285	lymphocyte activation involved in immune response	6/63	194/18723	4.76391e-05	0.000722526	0.000485271	CORO1A/HLA-DMB/IL23A/ITM2A/LCP1/PTPRC	6
BP	GO:0002688	regulation of leukocyte chemotaxis	5/63	122/18723	5.62145e-05	0.000843796	0.00056672	CCL5/CCR7/CX3CR1/KLRK1/RAC2	5
BP	GO:0019722	calcium-mediated signaling	6/63	202/18723	5.96424e-05	0.000878628	0.000590114	CCR7/CD3E/CX3CR1/PLEK/PTPRC/TRAT1	6
BP	GO:0002704	negative regulation of leukocyte mediated immunity	4/63	63/18723	5.97419e-05	0.000878628	0.000590114	CD96/CX3CR1/IL7R/PTPRC	4
BP	GO:0071677	positive regulation of mononuclear cell migration	4/63	65/18723	6.75626e-05	0.000975544	0.000655206	CCL5/CCR7/CX3CR1/DOCK8	4
BP	GO:0051056	regulation of small GTPase mediated signal transduction	7/63	302/18723	6.76717e-05	0.000975544	0.000655206	ARHGAP15/ARHGAP30/ARHGDIB/DOCK8/GPR174/GPR65/TAGAP	7
BP	GO:0001911	negative regulation of leukocyte mediated cytotoxicity	3/63	24/18723	6.98702e-05	0.00098768	0.000663356	CX3CR1/IL7R/PTPRC	3
BP	GO:0050855	regulation of B cell receptor signaling pathway	3/63	24/18723	6.98702e-05	0.00098768	0.000663356	PRKCB/PRKCH/PTPN22	3
BP	GO:0002685	regulation of leukocyte migration	6/63	210/18723	7.39525e-05	0.00103534	0.000695363	CCL5/CCR7/CX3CR1/DOCK8/KLRK1/RAC2	6
BP	GO:0046635	positive regulation of alpha-beta T cell activation	4/63	67/18723	7.61042e-05	0.00105531	0.00070878	CD3E/IL23A/PTPN22/PTPRC	4
BP	GO:0045089	positive regulation of innate immune response	5/63	131/18723	7.88575e-05	0.00107741	0.000723621	CCL5/FCN1/FYN/GBP5/KLRK1	5
BP	GO:0060326	cell chemotaxis	7/63	310/18723	7.97201e-05	0.00107741	0.000723621	CCL5/CCR7/CORO1A/CX3CR1/ITGB2/KLRK1/RAC2	7
BP	GO:0042267	natural killer cell mediated cytotoxicity	4/63	68/18723	8.06576e-05	0.00107741	0.000723621	CORO1A/GZMB/KLRK1/SLAMF7	4
BP	GO:0042531	positive regulation of tyrosine phosphorylation of STAT protein	4/63	68/18723	8.06576e-05	0.00107741	0.000723621	CCL5/FYN/IL23A/IL24	4
BP	GO:0002687	positive regulation of leukocyte migration	5/63	135/18723	9.09258e-05	0.00120353	0.000808326	CCL5/CCR7/CX3CR1/DOCK8/RAC2	5
BP	GO:0033627	cell adhesion mediated by integrin	4/63	72/18723	0.000100873	0.00132316	0.000888677	CCL5/CD3E/ITGB2/SKAP1	4
BP	GO:0002274	myeloid leukocyte activation	6/63	223/18723	0.00010294	0.00133823	0.000898794	CCL5/CX3CR1/ITGB2/LCP2/PTPRC/RAC2	6
BP	GO:0031342	negative regulation of cell killing	3/63	28/18723	0.00011201	0.00144324	0.000969325	CX3CR1/IL7R/PTPRC	3
BP	GO:0070229	negative regulation of lymphocyte apoptotic process	3/63	30/18723	0.000138151	0.00176445	0.00118506	CCL5/DOCK8/IL7R	3
BP	GO:0031334	positive regulation of protein-containing complex assembly	6/63	237/18723	0.000143599	0.00181809	0.00122108	CCR7/CORO1A/GBP5/LCP1/PLEK/SKAP1	6
BP	GO:0001819	positive regulation of cytokine production	8/63	467/18723	0.000164111	0.00205988	0.00138348	CCR7/CD3E/FCN1/GBP5/IL23A/ITK/PTPN22/PTPRC	8
BP	GO:0019835	cytolysis	3/63	32/18723	0.000167968	0.00208312	0.00139909	GZMA/GZMB/GZMH	3
BP	GO:0008360	regulation of cell shape	5/63	154/18723	0.000168825	0.00208312	0.00139909	ARHGAP15/CORO1A/FYN/ITGB2/RAC2	5
BP	GO:0046631	alpha-beta T cell activation	5/63	156/18723	0.000179304	0.00219383	0.00147345	CD3E/IL23A/ITK/PTPN22/PTPRC	5
BP	GO:0036336	dendritic cell migration	3/63	33/18723	0.000184322	0.00221796	0.00148965	CCL5/CCR7/DOCK8	3
BP	GO:0071353	cellular response to interleukin-4	3/63	33/18723	0.000184322	0.00221796	0.00148965	CORO1A/IL24/IL2RG	3
BP	GO:0002460	adaptive immune response based on somatic recombination of immune receptors built from immunoglobulin superfamily domains	7/63	356/18723	0.000187777	0.00224101	0.00150513	CD8A/HLA-DMB/IGHA1/IL23A/IL7R/PTPRC/TRBC1	7
BP	GO:0001818	negative regulation of cytokine production	7/63	357/18723	0.000191031	0.00225621	0.00151534	CCR7/CD96/CX3CR1/IL23A/LAPTM4B/PTPN22/PTPRC	7
BP	GO:0042509	regulation of tyrosine phosphorylation of STAT protein	4/63	85/18723	0.00019215	0.00225621	0.00151534	CCL5/FYN/IL23A/IL24	4
BP	GO:0060402	calcium ion transport into cytosol	5/63	160/18723	0.000201746	0.00234994	0.00157829	CCR7/CORO1A/FYN/MS4A1/PTPRC	5
BP	GO:0031589	cell-substrate adhesion	7/63	363/18723	0.000211527	0.00244432	0.00164168	CCR7/CD3E/CD96/CORO1A/ITGB2/RAC2/SKAP1	7
BP	GO:0007260	tyrosine phosphorylation of STAT protein	4/63	88/18723	0.000219633	0.002518	0.00169116	CCL5/FYN/IL23A/IL24	4
BP	GO:0070670	response to interleukin-4	3/63	36/18723	0.000239484	0.00272413	0.00182961	CORO1A/IL24/IL2RG	3
BP	GO:0002706	regulation of lymphocyte mediated immunity	5/63	168/18723	0.000253007	0.00283368	0.00190319	CD96/IL23A/IL7R/KLRK1/PTPRC	5
BP	GO:0002833	positive regulation of response to biotic stimulus	5/63	168/18723	0.000253007	0.00283368	0.00190319	CCL5/FCN1/FYN/GBP5/KLRK1	5
BP	GO:0007259	receptor signaling pathway via JAK-STAT	5/63	170/18723	0.000267243	0.00297027	0.00199493	CCL5/FYN/IL23A/IL24/PTPRC	5
BP	GO:0002690	positive regulation of leukocyte chemotaxis	4/63	94/18723	0.000282928	0.00312078	0.00209601	CCL5/CCR7/CX3CR1/RAC2	4
BP	GO:0048872	homeostasis of number of cells	6/63	272/18723	0.000302035	0.00330649	0.00222074	CCR7/CORO1A/CX3CR1/GPR174/IKZF1/IL7R	6
BP	GO:0001914	regulation of T cell mediated cytotoxicity	3/63	39/18723	0.000304337	0.00330682	0.00222096	IL23A/IL7R/PTPRC	3
BP	GO:1990868	response to chemokine	4/63	97/18723	0.000319051	0.00341572	0.00229411	CCL5/CCR7/CX3CR1/DOCK8	4
BP	GO:1990869	cellular response to chemokine	4/63	97/18723	0.000319051	0.00341572	0.00229411	CCL5/CCR7/CX3CR1/DOCK8	4
BP	GO:0042100	B cell proliferation	4/63	99/18723	0.000344898	0.00366548	0.00246185	IKZF3/IL7R/MS4A1/PTPRC	4
BP	GO:0050856	regulation of T cell receptor signaling pathway	3/63	41/18723	0.00035329	0.00372747	0.00250348	CCR7/PTPN22/TRAT1	3
BP	GO:0060401	cytosolic calcium ion transport	5/63	182/18723	0.000365875	0.00383248	0.00257401	CCR7/CORO1A/FYN/MS4A1/PTPRC	5
BP	GO:0002819	regulation of adaptive immune response	5/63	183/18723	0.000375187	0.00390195	0.00262067	CD48/IL23A/IL7R/PTPRC/SKAP1	5
BP	GO:0030593	neutrophil chemotaxis	4/63	103/18723	0.000401039	0.00411206	0.00276179	CCL5/CCR7/ITGB2/RAC2	4
BP	GO:0046425	regulation of receptor signaling pathway via JAK-STAT	4/63	103/18723	0.000401039	0.00411206	0.00276179	CCL5/IL23A/IL24/PTPRC	4
BP	GO:0046634	regulation of alpha-beta T cell activation	4/63	104/18723	0.000416035	0.004236	0.00284503	CD3E/IL23A/PTPN22/PTPRC	4
BP	GO:1905477	positive regulation of protein localization to membrane	4/63	106/18723	0.000447224	0.00452193	0.00303707	FYN/GZMB/ITGB2/PRKCH	4
BP	GO:0001915	negative regulation of T cell mediated cytotoxicity	2/63	10/18723	0.000492797	0.00488103	0.00327825	IL7R/PTPRC	2
BP	GO:0035747	natural killer cell chemotaxis	2/63	10/18723	0.000492797	0.00488103	0.00327825	CCL5/KLRK1	2
BP	GO:0050861	positive regulation of B cell receptor signaling pathway	2/63	10/18723	0.000492797	0.00488103	0.00327825	PRKCB/PRKCH	2
BP	GO:0002456	T cell mediated immunity	4/63	109/18723	0.000497087	0.00489026	0.00328445	CD8A/IL23A/IL7R/PTPRC	4
BP	GO:0071674	mononuclear cell migration	5/63	196/18723	0.000513291	0.00499459	0.00335452	CCL5/CCR7/CX3CR1/DOCK8/KLRK1	5
BP	GO:0002698	negative regulation of immune effector process	4/63	110/18723	0.000514553	0.00499459	0.00335452	CD96/CX3CR1/IL7R/PTPRC	4
BP	GO:0006816	calcium ion transport	7/63	422/18723	0.000524293	0.00505543	0.00339539	CCL5/CCR7/CORO1A/FYN/MS4A1/PRKCB/PTPRC	7
BP	GO:0001774	microglial cell activation	3/63	47/18723	0.000529725	0.00507421	0.00340799	CX3CR1/ITGB2/PTPRC	3
BP	GO:0033628	regulation of cell adhesion mediated by integrin	3/63	48/18723	0.000563689	0.00536425	0.0036028	CCL5/CD3E/SKAP1	3
BP	GO:0001913	T cell mediated cytotoxicity	3/63	49/18723	0.000599016	0.00557362	0.00374341	IL23A/IL7R/PTPRC	3
BP	GO:1904894	positive regulation of receptor signaling pathway via STAT	3/63	49/18723	0.000599016	0.00557362	0.00374341	CCL5/IL23A/IL7R	3
BP	GO:0001787	natural killer cell proliferation	2/63	11/18723	0.000601001	0.00557362	0.00374341	IL23A/PTPN22	2
BP	GO:0033625	positive regulation of integrin activation	2/63	11/18723	0.000601001	0.00557362	0.00374341	PLEK/SKAP1	2
BP	GO:0002683	negative regulation of immune system process	7/63	434/18723	0.000619094	0.00570507	0.0038317	CD96/CX3CR1/FYN/IL7R/KLRK1/PTPN22/PTPRC	7
BP	GO:0019932	second-messenger-mediated signaling	6/63	312/18723	0.000624379	0.00571758	0.00384011	CCR7/CD3E/CX3CR1/PLEK/PTPRC/TRAT1	6
BP	GO:0072676	lymphocyte migration	4/63	117/18723	0.000649276	0.00590841	0.00396827	CCL5/CCR7/DOCK8/KLRK1	4
BP	GO:0071622	regulation of granulocyte chemotaxis	3/63	51/18723	0.000673846	0.00609391	0.00409286	CCL5/CCR7/RAC2	3
BP	GO:0006959	humoral immune response	6/63	317/18723	0.000678512	0.00609823	0.00409576	CCR7/FCN1/IGHA1/MS4A1/PTPRC/TRBC1	6
BP	GO:0002707	negative regulation of lymphocyte mediated immunity	3/63	53/18723	0.000754389	0.00673859	0.00452585	CD96/IL7R/PTPRC	3
BP	GO:1990266	neutrophil migration	4/63	122/18723	0.000759652	0.00674423	0.00452964	CCL5/CCR7/ITGB2/RAC2	4
BP	GO:0006968	cellular defense response	3/63	54/18723	0.000796856	0.00703165	0.00472268	CX3CR1/ITK/TRAT1	3
BP	GO:0071621	granulocyte chemotaxis	4/63	125/18723	0.000831906	0.00729672	0.0049007	CCL5/CCR7/ITGB2/RAC2	4
BP	GO:0001768	establishment of T cell polarity	2/63	13/18723	0.000848638	0.00735487	0.00493976	CCR7/DOCK8	2
BP	GO:0070234	positive regulation of T cell apoptotic process	2/63	13/18723	0.000848638	0.00735487	0.00493976	CCL5/IDO1	2
BP	GO:0097529	myeloid leukocyte migration	5/63	220/18723	0.000864738	0.00745005	0.00500369	CCL5/CCR7/CX3CR1/ITGB2/RAC2	5
BP	GO:0006911	phagocytosis, engulfment	4/63	127/18723	0.00088269	0.00750252	0.00503892	IGHA1/ITGB2/RAC2/TRBC1	4
BP	GO:0001912	positive regulation of leukocyte mediated cytotoxicity	3/63	56/18723	0.000886286	0.00750252	0.00503892	IL23A/KLRK1/PTPRC	3
BP	GO:0002886	regulation of myeloid leukocyte mediated immunity	3/63	56/18723	0.000886286	0.00750252	0.00503892	CX3CR1/ITGB2/RAC2	3
BP	GO:0050920	regulation of chemotaxis	5/63	223/18723	0.0009188	0.00773279	0.00519358	CCL5/CCR7/CX3CR1/KLRK1/RAC2	5
BP	GO:0008037	cell recognition	5/63	225/18723	0.000956215	0.00800144	0.00537401	CCR7/DOCK8/FCN1/IGHA1/TRBC1	5
BP	GO:0001954	positive regulation of cell-matrix adhesion	3/63	58/18723	0.000981847	0.00812672	0.00545816	CCR7/CD3E/SKAP1	3
BP	GO:0001767	establishment of lymphocyte polarity	2/63	14/18723	0.000987933	0.00812672	0.00545816	CCR7/DOCK8	2
BP	GO:0001771	immunological synapse formation	2/63	14/18723	0.000987933	0.00812672	0.00545816	CCR7/DOCK8	2
BP	GO:0019221	cytokine-mediated signaling pathway	7/63	472/18723	0.00101245	0.00828165	0.00556221	CCL5/CCR7/CX3CR1/IL2RB/IL2RG/IL7R/PTPRC	7
BP	GO:0032496	response to lipopolysaccharide	6/63	343/18723	0.00102132	0.00830752	0.00557959	CCL5/CCR7/CD96/CX3CR1/IL24/PTPN22	6
BP	GO:0033157	regulation of intracellular protein transport	5/63	229/18723	0.00103444	0.00836746	0.00561985	FYN/GZMB/ITGB2/LCP1/RAC2	5
BP	GO:0045055	regulated exocytosis	5/63	230/18723	0.00105472	0.00848435	0.00569835	CORO1A/ITGB2/PLEK/PRKCB/RAC2	5
BP	GO:0002705	positive regulation of leukocyte mediated immunity	4/63	134/18723	0.00107769	0.00862149	0.00579046	IL23A/ITGB2/KLRK1/PTPRC	4
BP	GO:0043087	regulation of GTPase activity	6/63	348/18723	0.00110028	0.00867909	0.00582914	ARHGAP15/CCL5/CCR7/DOCK8/GPR65/KLRK1	6
BP	GO:0007160	cell-matrix adhesion	5/63	233/18723	0.00111733	0.00867909	0.00582914	CCR7/CD3E/CD96/ITGB2/SKAP1	5
BP	GO:0030865	cortical cytoskeleton organization	3/63	61/18723	0.00113703	0.00867909	0.00582914	LCP1/PLEK/RAC2	3
BP	GO:0034113	heterotypic cell-cell adhesion	3/63	61/18723	0.00113703	0.00867909	0.00582914	ITGB2/PTPRC/SKAP1	3
BP	GO:2000401	regulation of lymphocyte migration	3/63	61/18723	0.00113703	0.00867909	0.00582914	CCL5/DOCK8/KLRK1	3
BP	GO:0042976	activation of Janus kinase activity	2/63	15/18723	0.00113745	0.00867909	0.00582914	CCL5/IL23A	2
BP	GO:0098760	response to interleukin-7	2/63	15/18723	0.00113745	0.00867909	0.00582914	IL2RG/IL7R	2
BP	GO:0098761	cellular response to interleukin-7	2/63	15/18723	0.00113745	0.00867909	0.00582914	IL2RG/IL7R	2
BP	GO:0099024	plasma membrane invagination	4/63	136/18723	0.00113853	0.00867909	0.00582914	IGHA1/ITGB2/RAC2/TRBC1	4
BP	GO:0006887	exocytosis	6/63	352/18723	0.00116675	0.00884788	0.00594251	CCL5/CORO1A/ITGB2/PLEK/PRKCB/RAC2	6
BP	GO:0031343	positive regulation of cell killing	3/63	63/18723	0.0012486	0.00941952	0.00632644	IL23A/KLRK1/PTPRC	3
BP	GO:0032956	regulation of actin cytoskeleton organization	6/63	358/18723	0.00127221	0.00954813	0.00641282	ARHGDIB/CCR7/CORO1A/GPR65/PLEK/RAC2	6
BP	GO:0050862	positive regulation of T cell receptor signaling pathway	2/63	16/18723	0.00129713	0.00956798	0.00642615	CCR7/TRAT1	2
BP	GO:0070230	positive regulation of lymphocyte apoptotic process	2/63	16/18723	0.00129713	0.00956798	0.00642615	CCL5/IDO1	2
BP	GO:0030183	B cell differentiation	4/63	141/18723	0.00130114	0.00956798	0.00642615	IKZF3/ITM2A/MS4A1/PTPRC	4
BP	GO:0050921	positive regulation of chemotaxis	4/63	141/18723	0.00130114	0.00956798	0.00642615	CCL5/CCR7/CX3CR1/RAC2	4
BP	GO:0097553	calcium ion transmembrane import into cytosol	4/63	142/18723	0.00133551	0.00977137	0.00656275	CCR7/CORO1A/FYN/PTPRC	4
BP	GO:0002237	response to molecule of bacterial origin	6/63	363/18723	0.00136555	0.00994119	0.00667681	CCL5/CCR7/CD96/CX3CR1/IL24/PTPN22	6
BP	GO:0010324	membrane invagination	4/63	144/18723	0.00140614	0.0101858	0.0068411	IGHA1/ITGB2/RAC2/TRBC1	4
BP	GO:0050766	positive regulation of phagocytosis	3/63	66/18723	0.00142852	0.0102967	0.00691557	IL2RB/IL2RG/PTPRC	3
BP	GO:1903706	regulation of hemopoiesis	6/63	367/18723	0.00144393	0.0103564	0.0069557	EVI2B/GPR171/IKZF3/IL23A/IL7R/PTPRC	6
BP	GO:0033623	regulation of integrin activation	2/63	17/18723	0.0014669	0.0104186	0.00699743	PLEK/SKAP1	2
BP	GO:0060263	regulation of respiratory burst	2/63	17/18723	0.0014669	0.0104186	0.00699743	IGHA1/RAC2	2
BP	GO:0097530	granulocyte migration	4/63	148/18723	0.00155518	0.0109919	0.00738251	CCL5/CCR7/ITGB2/RAC2	4
BP	GO:0032729	positive regulation of interferon-gamma production	3/63	72/18723	0.00183535	0.0129095	0.00867041	CD3E/IL23A/PTPN22	3
BP	GO:0043299	leukocyte degranulation	3/63	73/18723	0.00190944	0.0133021	0.00893413	CORO1A/ITGB2/RAC2	3
BP	GO:0050848	regulation of calcium-mediated signaling	3/63	73/18723	0.00190944	0.0133021	0.00893413	CD3E/PLEK/TRAT1	3
BP	GO:1902107	positive regulation of leukocyte differentiation	4/63	157/18723	0.00193012	0.0133188	0.0089453	EVI2B/IL23A/IL7R/PTPRC	4
BP	GO:1903708	positive regulation of hemopoiesis	4/63	157/18723	0.00193012	0.0133188	0.0089453	EVI2B/IL23A/IL7R/PTPRC	4
BP	GO:0046629	gamma-delta T cell activation	2/63	20/18723	0.00203607	0.0139836	0.00939179	ITK/PTPRC	2
BP	GO:0090316	positive regulation of intracellular protein transport	4/63	160/18723	0.00206789	0.0141354	0.00949379	FYN/GZMB/ITGB2/RAC2	4
BP	GO:0032970	regulation of actin filament-based process	6/63	397/18723	0.00214677	0.0146061	0.00980989	ARHGDIB/CCR7/CORO1A/GPR65/PLEK/RAC2	6
BP	GO:0070269	pyroptosis	2/63	21/18723	0.00224552	0.0151365	0.0101661	GZMA/GZMB	2
BP	GO:0090026	positive regulation of monocyte chemotaxis	2/63	21/18723	0.00224552	0.0151365	0.0101661	CCL5/CX3CR1	2
BP	GO:1903829	positive regulation of cellular protein localization	5/63	276/18723	0.00234976	0.0157661	0.010589	FYN/GZMB/ITGB2/PRKCH/RAC2	5
BP	GO:1902105	regulation of leukocyte differentiation	5/63	279/18723	0.00246226	0.0163121	0.0109557	EVI2B/IKZF3/IL23A/IL7R/PTPRC	5
BP	GO:0002220	innate immune response activating cell surface receptor signaling pathway	2/63	22/18723	0.00246473	0.0163121	0.0109557	FCN1/FYN	2
BP	GO:0010310	regulation of hydrogen peroxide metabolic process	2/63	22/18723	0.00246473	0.0163121	0.0109557	FYN/RAC2	2
BP	GO:1903533	regulation of protein targeting	3/63	81/18723	0.00256985	0.0169308	0.0113712	FYN/ITGB2/RAC2	3
BP	GO:0002758	innate immune response-activating signal transduction	2/63	23/18723	0.00269363	0.0176664	0.0118653	FCN1/FYN	2
BP	GO:0045619	regulation of lymphocyte differentiation	4/63	174/18723	0.0028015	0.0182914	0.0122851	IKZF3/IL23A/IL7R/PTPRC	4
BP	GO:1905475	regulation of protein localization to membrane	4/63	175/18723	0.00285989	0.0185893	0.0124851	FYN/GZMB/ITGB2/PRKCH	4
BP	GO:0002922	positive regulation of humoral immune response	2/63	24/18723	0.00293216	0.0188904	0.0126874	CCR7/PTPRC	2
BP	GO:0090023	positive regulation of neutrophil chemotaxis	2/63	24/18723	0.00293216	0.0188904	0.0126874	CCR7/RAC2	2
BP	GO:0002709	regulation of T cell mediated immunity	3/63	85/18723	0.00294674	0.0189007	0.0126943	IL23A/IL7R/PTPRC	3
BP	GO:0035023	regulation of Rho protein signal transduction	3/63	86/18723	0.00304598	0.0194515	0.0130643	ARHGDIB/GPR174/GPR65	3
BP	GO:0043254	regulation of protein-containing complex assembly	6/63	428/18723	0.00311847	0.0198275	0.0133167	CCR7/CORO1A/GBP5/LCP1/PLEK/SKAP1	6
BP	GO:0033622	integrin activation	2/63	25/18723	0.00318024	0.0200451	0.0134629	PLEK/SKAP1	2
BP	GO:1901623	regulation of lymphocyte chemotaxis	2/63	25/18723	0.00318024	0.0200451	0.0134629	CCL5/KLRK1	2
BP	GO:0032640	tumor necrosis factor production	4/63	181/18723	0.00322782	0.0201704	0.0135471	CX3CR1/IL23A/PTPN22/PTPRC	4
BP	GO:0032680	regulation of tumor necrosis factor production	4/63	181/18723	0.00322782	0.0201704	0.0135471	CX3CR1/IL23A/PTPN22/PTPRC	4
BP	GO:0070098	chemokine-mediated signaling pathway	3/63	88/18723	0.00325059	0.0202259	0.0135843	CCL5/CCR7/CX3CR1	3
BP	GO:0002407	dendritic cell chemotaxis	2/63	26/18723	0.00343782	0.0209434	0.0140662	CCL5/CCR7	2
BP	GO:0002710	negative regulation of T cell mediated immunity	2/63	26/18723	0.00343782	0.0209434	0.0140662	IL7R/PTPRC	2
BP	GO:1902656	calcium ion import into cytosol	2/63	26/18723	0.00343782	0.0209434	0.0140662	FYN/MS4A1	2
BP	GO:1905523	positive regulation of macrophage migration	2/63	26/18723	0.00343782	0.0209434	0.0140662	CCL5/CX3CR1	2
BP	GO:2000108	positive regulation of leukocyte apoptotic process	2/63	26/18723	0.00343782	0.0209434	0.0140662	CCL5/IDO1	2
BP	GO:0071706	tumor necrosis factor superfamily cytokine production	4/63	186/18723	0.00355815	0.0214086	0.0143787	CX3CR1/IL23A/PTPN22/PTPRC	4
BP	GO:1903555	regulation of tumor necrosis factor superfamily cytokine production	4/63	186/18723	0.00355815	0.0214086	0.0143787	CX3CR1/IL23A/PTPN22/PTPRC	4
BP	GO:0002275	myeloid cell activation involved in immune response	3/63	91/18723	0.003573	0.0214086	0.0143787	CX3CR1/ITGB2/RAC2	3
BP	GO:0045582	positive regulation of T cell differentiation	3/63	91/18723	0.003573	0.0214086	0.0143787	IL23A/IL7R/PTPRC	3
BP	GO:0007015	actin filament organization	6/63	442/18723	0.00365189	0.0217916	0.0146359	CCR7/CORO1A/GPR65/LCP1/PLEK/RAC2	6
BP	GO:0002433	immune response-regulating cell surface receptor signaling pathway involved in phagocytosis	2/63	27/18723	0.00370482	0.0218389	0.0146677	FYN/PTPRC	2
BP	GO:0038096	Fc-gamma receptor signaling pathway involved in phagocytosis	2/63	27/18723	0.00370482	0.0218389	0.0146677	FYN/PTPRC	2
BP	GO:0071624	positive regulation of granulocyte chemotaxis	2/63	27/18723	0.00370482	0.0218389	0.0146677	CCR7/RAC2	2
BP	GO:0002440	production of molecular mediator of immune response	5/63	308/18723	0.00376117	0.0220817	0.0148308	CD96/HLA-DMB/IGLV1-44/PTPN22/PTPRC	5
BP	GO:0022604	regulation of cell morphogenesis	5/63	309/18723	0.00381327	0.0222977	0.0149758	ARHGAP15/CORO1A/FYN/ITGB2/RAC2	5
BP	GO:0038094	Fc-gamma receptor signaling pathway	2/63	28/18723	0.00398119	0.0230941	0.0155107	FYN/PTPRC	2
BP	GO:1902624	positive regulation of neutrophil migration	2/63	28/18723	0.00398119	0.0230941	0.0155107	CCR7/RAC2	2
BP	GO:0050764	regulation of phagocytosis	3/63	95/18723	0.00403236	0.0232981	0.0156477	IL2RB/IL2RG/PTPRC	3
BP	GO:0050777	negative regulation of immune response	4/63	194/18723	0.00413336	0.0237872	0.0159762	CD96/FYN/IL7R/PTPRC	4
BP	GO:0001916	positive regulation of T cell mediated cytotoxicity	2/63	29/18723	0.00426686	0.0242678	0.016299	IL23A/PTPRC	2
BP	GO:0090025	regulation of monocyte chemotaxis	2/63	29/18723	0.00426686	0.0242678	0.016299	CCL5/CX3CR1	2
BP	GO:2000406	positive regulation of T cell migration	2/63	29/18723	0.00426686	0.0242678	0.016299	CCL5/DOCK8	2
BP	GO:1901214	regulation of neuron death	5/63	319/18723	0.00436317	0.0247189	0.016602	CCL5/CORO1A/CX3CR1/FYN/ITGB2	5
BP	GO:0050864	regulation of B cell activation	4/63	198/18723	0.00444328	0.0250752	0.0168413	IGHA1/IKZF3/PTPRC/TRBC1	4
BP	GO:0002444	myeloid leukocyte mediated immunity	3/63	99/18723	0.00452611	0.0254441	0.017089	CX3CR1/ITGB2/RAC2	3
BP	GO:0090314	positive regulation of protein targeting to membrane	2/63	30/18723	0.00456177	0.0255459	0.0171574	FYN/ITGB2	2
BP	GO:0006910	phagocytosis, recognition	3/63	100/18723	0.00465501	0.0259682	0.017441	FCN1/IGHA1/TRBC1	3
BP	GO:0032388	positive regulation of intracellular transport	4/63	202/18723	0.00476853	0.0264999	0.0177982	FYN/GZMB/ITGB2/RAC2	4
BP	GO:0002230	positive regulation of defense response to virus by host	2/63	31/18723	0.00486585	0.026938	0.0180924	IL23A/PTPN22	2
BP	GO:0032677	regulation of interleukin-8 production	3/63	102/18723	0.00491944	0.0271314	0.0182223	FCN1/PTPN22/PTPRC	3
BP	GO:0032637	interleukin-8 production	3/63	103/18723	0.00505499	0.0277738	0.0186538	FCN1/PTPN22/PTPRC	3
BP	GO:0050850	positive regulation of calcium-mediated signaling	2/63	32/18723	0.00517904	0.0280264	0.0188234	CD3E/TRAT1	2
BP	GO:0090022	regulation of neutrophil chemotaxis	2/63	32/18723	0.00517904	0.0280264	0.0188234	CCR7/RAC2	2
BP	GO:0007200	phospholipase C-activating G protein-coupled receptor signaling pathway	3/63	104/18723	0.00519278	0.0280264	0.0188234	CX3CR1/GPR174/GPR65	3
BP	GO:0045621	positive regulation of lymphocyte differentiation	3/63	104/18723	0.00519278	0.0280264	0.0188234	IL23A/IL7R/PTPRC	3
BP	GO:0016064	immunoglobulin mediated immune response	4/63	207/18723	0.0051972	0.0280264	0.0188234	HLA-DMB/IGHA1/PTPRC/TRBC1	4
BP	GO:0071222	cellular response to lipopolysaccharide	4/63	209/18723	0.00537567	0.0287757	0.0193266	CCL5/CX3CR1/IL24/PTPN22	4
BP	GO:1902905	positive regulation of supramolecular fiber organization	4/63	209/18723	0.00537567	0.0287757	0.0193266	CCR7/CORO1A/GPR65/PLEK	4
BP	GO:0019724	B cell mediated immunity	4/63	210/18723	0.00546643	0.0288125	0.0193514	HLA-DMB/IGHA1/PTPRC/TRBC1	4
BP	GO:0019882	antigen processing and presentation	3/63	106/18723	0.00547512	0.0288125	0.0193514	CCR7/CD8A/HLA-DMB	3
BP	GO:0042116	macrophage activation	3/63	106/18723	0.00547512	0.0288125	0.0193514	CX3CR1/ITGB2/PTPRC	3
BP	GO:0032386	regulation of intracellular transport	5/63	337/18723	0.0054924	0.0288125	0.0193514	FYN/GZMB/ITGB2/LCP1/RAC2	5
BP	GO:0002431	Fc receptor mediated stimulatory signaling pathway	2/63	33/18723	0.00550129	0.0288125	0.0193514	FYN/PTPRC	2
BP	GO:0035025	positive regulation of Rho protein signal transduction	2/63	33/18723	0.00550129	0.0288125	0.0193514	GPR174/GPR65	2
BP	GO:0031532	actin cytoskeleton reorganization	3/63	107/18723	0.00561969	0.0293271	0.019697	ARHGDIB/GPR65/PLEK	3
BP	GO:0010922	positive regulation of phosphatase activity	2/63	34/18723	0.00583251	0.030114	0.0202255	PLEK/PTPRC	2
BP	GO:0032743	positive regulation of interleukin-2 production	2/63	34/18723	0.00583251	0.030114	0.0202255	CD3E/PTPRC	2
BP	GO:0051482	positive regulation of cytosolic calcium ion concentration involved in phospholipase C-activating G protein-coupled signaling pathway	2/63	34/18723	0.00583251	0.030114	0.0202255	GPR174/GPR65	2
BP	GO:0032611	interleukin-1 beta production	3/63	110/18723	0.0060671	0.0311046	0.0208908	CCR7/CX3CR1/GBP5	3
BP	GO:0032651	regulation of interleukin-1 beta production	3/63	110/18723	0.0060671	0.0311046	0.0208908	CCR7/CX3CR1/GBP5	3
BP	GO:0070374	positive regulation of ERK1 and ERK2 cascade	4/63	217/18723	0.00613065	0.031315	0.0210321	CCL5/CCR7/PTPN22/PTPRC	4
BP	GO:0032814	regulation of natural killer cell activation	2/63	35/18723	0.00617266	0.031315	0.0210321	IL23A/PTPN22	2
BP	GO:2000403	positive regulation of lymphocyte migration	2/63	35/18723	0.00617266	0.031315	0.0210321	CCL5/DOCK8	2
BP	GO:0007163	establishment or maintenance of cell polarity	4/63	218/18723	0.00622972	0.0314947	0.0211528	CCR7/CD3G/DOCK8/RAC2	4
BP	GO:0002821	positive regulation of adaptive immune response	3/63	112/18723	0.0063769	0.0321272	0.0215776	IL23A/PTPRC/SKAP1	3
BP	GO:0042119	neutrophil activation	2/63	36/18723	0.00652167	0.0322555	0.0216638	CCL5/ITGB2	2
BP	GO:0090313	regulation of protein targeting to membrane	2/63	36/18723	0.00652167	0.0322555	0.0216638	FYN/ITGB2	2
BP	GO:1903749	positive regulation of establishment of protein localization to mitochondrion	2/63	36/18723	0.00652167	0.0322555	0.0216638	GZMB/RAC2	2
BP	GO:0010810	regulation of cell-substrate adhesion	4/63	221/18723	0.00653335	0.0322555	0.0216638	CCR7/CD3E/RAC2/SKAP1	4
BP	GO:0071219	cellular response to molecule of bacterial origin	4/63	221/18723	0.00653335	0.0322555	0.0216638	CCL5/CX3CR1/IL24/PTPN22	4
BP	GO:0002708	positive regulation of lymphocyte mediated immunity	3/63	113/18723	0.00653528	0.0322555	0.0216638	IL23A/KLRK1/PTPRC	3
BP	GO:0002286	T cell activation involved in immune response	3/63	114/18723	0.006696	0.0329371	0.0221216	HLA-DMB/IL23A/LCP1	3
BP	GO:0051209	release of sequestered calcium ion into cytosol	3/63	115/18723	0.00685905	0.0335001	0.0224997	CCR7/CORO1A/PTPRC	3
BP	GO:0043029	T cell homeostasis	2/63	37/18723	0.00687948	0.0335001	0.0224997	CORO1A/GPR174	2
BP	GO:0045730	respiratory burst	2/63	37/18723	0.00687948	0.0335001	0.0224997	IGHA1/RAC2	2
BP	GO:0051283	negative regulation of sequestering of calcium ion	3/63	116/18723	0.00702446	0.0340921	0.0228973	CCR7/CORO1A/PTPRC	3
BP	GO:0051495	positive regulation of cytoskeleton organization	4/63	226/18723	0.00706099	0.0341555	0.0229399	CCR7/CORO1A/GPR65/PLEK	4
BP	GO:0070997	neuron death	5/63	361/18723	0.00730154	0.0352021	0.0236428	CCL5/CORO1A/CX3CR1/FYN/ITGB2	5
BP	GO:0051282	regulation of sequestering of calcium ion	3/63	118/18723	0.00736237	0.0353782	0.0237611	CCR7/CORO1A/PTPRC	3
BP	GO:0002455	humoral immune response mediated by circulating immunoglobulin	3/63	121/18723	0.00788706	0.0377748	0.0253708	IGHA1/PTPRC/TRBC1	3
BP	GO:0030866	cortical actin cytoskeleton organization	2/63	40/18723	0.0080051	0.0382145	0.025666	LCP1/PLEK	2
BP	GO:0051208	sequestering of calcium ion	3/63	122/18723	0.00806674	0.0383829	0.0257792	CCR7/CORO1A/PTPRC	3
BP	GO:0010811	positive regulation of cell-substrate adhesion	3/63	123/18723	0.00824883	0.0391215	0.0262752	CCR7/CD3E/SKAP1	3
BP	GO:0032735	positive regulation of interleukin-12 production	2/63	41/18723	0.0083975	0.0393143	0.0264047	CCR7/IL23A	2
BP	GO:0050691	regulation of defense response to virus by host	2/63	41/18723	0.0083975	0.0393143	0.0264047	IL23A/PTPN22	2
BP	GO:1902622	regulation of neutrophil migration	2/63	41/18723	0.0083975	0.0393143	0.0264047	CCR7/RAC2	2
BP	GO:1905521	regulation of macrophage migration	2/63	41/18723	0.0083975	0.0393143	0.0264047	CCL5/CX3CR1	2
BP	GO:2000404	regulation of T cell migration	2/63	42/18723	0.0087984	0.0410592	0.0275766	CCL5/DOCK8	2
BP	GO:0030099	myeloid cell differentiation	5/63	381/18723	0.0090991	0.0421587	0.0283151	CCR7/EVI2B/GPR171/IKZF1/IL23A	5
BP	GO:0001952	regulation of cell-matrix adhesion	3/63	128/18723	0.00919559	0.0421587	0.0283151	CCR7/CD3E/SKAP1	3
BP	GO:0032612	interleukin-1 production	3/63	128/18723	0.00919559	0.0421587	0.0283151	CCR7/CX3CR1/GBP5	3
BP	GO:0032652	regulation of interleukin-1 production	3/63	128/18723	0.00919559	0.0421587	0.0283151	CCR7/CX3CR1/GBP5	3
BP	GO:0002861	regulation of inflammatory response to antigenic stimulus	2/63	43/18723	0.00920773	0.0421587	0.0283151	CCR7/FYN	2
BP	GO:0036230	granulocyte activation	2/63	43/18723	0.00920773	0.0421587	0.0283151	CCL5/ITGB2	2
BP	GO:0071216	cellular response to biotic stimulus	4/63	246/18723	0.00945249	0.0431436	0.0289766	CCL5/CX3CR1/IL24/PTPN22	4
BP	GO:0006956	complement activation	3/63	130/18723	0.00959138	0.0433743	0.0291315	FCN1/IGHA1/TRBC1	3
BP	GO:0045860	positive regulation of protein kinase activity	5/63	386/18723	0.0095924	0.0433743	0.0291315	CCL5/CCR7/IL23A/LCP2/PTPRC	5
BP	GO:0050727	regulation of inflammatory response	5/63	386/18723	0.0095924	0.0433743	0.0291315	CCL5/CCR7/FYN/IL23A/PTPRC	5
BP	GO:0046427	positive regulation of receptor signaling pathway via JAK-STAT	2/63	44/18723	0.00962544	0.043389	0.0291414	CCL5/IL23A	2
BP	GO:0002920	regulation of humoral immune response	2/63	45/18723	0.0100515	0.0451696	0.0303373	CCR7/PTPRC	2
BP	GO:0043300	regulation of leukocyte degranulation	2/63	46/18723	0.0104858	0.0469762	0.0315507	ITGB2/RAC2	2
BP	GO:0043547	positive regulation of GTPase activity	4/63	255/18723	0.0106819	0.047708	0.0320422	CCL5/CCR7/DOCK8/GPR65	4
BP	GO:1903305	regulation of regulated secretory pathway	3/63	136/18723	0.0108379	0.0482569	0.0324109	ITGB2/PRKCB/RAC2	3
BP	GO:0050798	activated T cell proliferation	2/63	47/18723	0.0109283	0.0485108	0.0325813	FYN/IL23A	2
BP	GO:0007266	Rho protein signal transduction	3/63	137/18723	0.0110544	0.0489215	0.0328572	ARHGDIB/GPR174/GPR65	3
BP	GO:0002715	regulation of natural killer cell mediated immunity	2/63	48/18723	0.0113789	0.050205	0.0337193	CD96/KLRK1	2
BP	GO:0038093	Fc receptor signaling pathway	2/63	50/18723	0.0123043	0.0539612	0.036242	FYN/PTPRC	2
BP	GO:1903747	regulation of establishment of protein localization to mitochondrion	2/63	50/18723	0.0123043	0.0539612	0.036242	GZMB/RAC2	2
BP	GO:0043524	negative regulation of neuron apoptotic process	3/63	145/18723	0.0128763	0.0562999	0.0378128	CORO1A/CX3CR1/FYN	3
BP	GO:0045580	regulation of T cell differentiation	3/63	146/18723	0.0131154	0.0571736	0.0383996	IL23A/IL7R/PTPRC	3
BP	GO:0002218	activation of innate immune response	2/63	52/18723	0.0132617	0.0574673	0.0385968	FCN1/FYN	2
BP	GO:0043277	apoptotic cell clearance	2/63	52/18723	0.0132617	0.0574673	0.0385968	FCN1/RAC2	2
BP	GO:0045744	negative regulation of G protein-coupled receptor signaling pathway	2/63	53/18723	0.0137522	0.0594159	0.0399056	CCL5/PLEK	2
BP	GO:0002823	negative regulation of adaptive immune response based on somatic recombination of immune receptors built from immunoglobulin superfamily domains	2/63	54/18723	0.0142505	0.0613387	0.041197	IL7R/PTPRC	2
BP	GO:0110053	regulation of actin filament organization	4/63	278/18723	0.0142815	0.0613387	0.041197	CCR7/CORO1A/GPR65/PLEK	4
BP	GO:0050871	positive regulation of B cell activation	3/63	152/18723	0.0146034	0.0623535	0.0418785	IGHA1/PTPRC/TRBC1	3
BP	GO:0051092	positive regulation of NF-kappaB transcription factor activity	3/63	152/18723	0.0146034	0.0623535	0.0418785	CX3CR1/PRKCB/PRKCH	3
BP	GO:1905517	macrophage migration	2/63	55/18723	0.0147565	0.0628229	0.0421938	CCL5/CX3CR1	2
BP	GO:0007249	I-kappaB kinase/NF-kappaB signaling	4/63	281/18723	0.0148012	0.0628294	0.0421982	CCR7/CX3CR1/FYN/PRKCB	4
BP	GO:0002711	positive regulation of T cell mediated immunity	2/63	56/18723	0.0152702	0.0642584	0.0431579	IL23A/PTPRC	2
BP	GO:0010518	positive regulation of phospholipase activity	2/63	56/18723	0.0152702	0.0642584	0.0431579	CCL5/ITK	2
BP	GO:0031529	ruffle organization	2/63	56/18723	0.0152702	0.0642584	0.0431579	CCR7/PLEK	2
BP	GO:0061756	leukocyte adhesion to vascular endothelial cell	2/63	57/18723	0.0157915	0.0662607	0.0445028	CX3CR1/ITGB2	2
BP	GO:0051017	actin filament bundle assembly	3/63	157/18723	0.0159137	0.0663908	0.0445901	GPR65/LCP1/PLEK	3
BP	GO:2000377	regulation of reactive oxygen species metabolic process	3/63	157/18723	0.0159137	0.0663908	0.0445901	FYN/ITGB2/RAC2	3
BP	GO:0002763	positive regulation of myeloid leukocyte differentiation	2/63	58/18723	0.0163204	0.0675073	0.04534	EVI2B/IL23A	2
BP	GO:0010559	regulation of glycoprotein biosynthetic process	2/63	58/18723	0.0163204	0.0675073	0.04534	CCR7/ITM2A	2
BP	GO:0042743	hydrogen peroxide metabolic process	2/63	58/18723	0.0163204	0.0675073	0.04534	FYN/RAC2	2
BP	GO:0002820	negative regulation of adaptive immune response	2/63	59/18723	0.0168569	0.069137	0.0464345	IL7R/PTPRC	2
BP	GO:0035306	positive regulation of dephosphorylation	2/63	59/18723	0.0168569	0.069137	0.0464345	PLEK/PTPRC	2
BP	GO:0048010	vascular endothelial growth factor receptor signaling pathway	2/63	59/18723	0.0168569	0.069137	0.0464345	FYN/PRKCB	2
BP	GO:0061572	actin filament bundle organization	3/63	161/18723	0.0170083	0.069562	0.04672	GPR65/LCP1/PLEK	3
BP	GO:0031663	lipopolysaccharide-mediated signaling pathway	2/63	60/18723	0.0174008	0.0707697	0.0475311	CCL5/PTPN22	2
BP	GO:0051851	modulation by host of symbiont process	2/63	60/18723	0.0174008	0.0707697	0.0475311	CCL5/CX3CR1	2
BP	GO:0002700	regulation of production of molecular mediator of immune response	3/63	164/18723	0.0178563	0.07242	0.0486395	CD96/PTPN22/PTPRC	3
BP	GO:0002260	lymphocyte homeostasis	2/63	62/18723	0.0185108	0.0738402	0.0495934	CORO1A/GPR174	2
BP	GO:0032615	interleukin-12 production	2/63	62/18723	0.0185108	0.0738402	0.0495934	CCR7/IL23A	2
BP	GO:0032623	interleukin-2 production	2/63	62/18723	0.0185108	0.0738402	0.0495934	CD3E/PTPRC	2
BP	GO:0032655	regulation of interleukin-12 production	2/63	62/18723	0.0185108	0.0738402	0.0495934	CCR7/IL23A	2
BP	GO:0032663	regulation of interleukin-2 production	2/63	62/18723	0.0185108	0.0738402	0.0495934	CD3E/PTPRC	2
BP	GO:0045576	mast cell activation	2/63	62/18723	0.0185108	0.0738402	0.0495934	LCP2/RAC2	2
CC	GO:0009897	external side of plasma membrane	19/66	421/19550	9.75865e-17	1.21007e-14	9.45048e-15	CCR7/CD3D/CD3E/CD3G/CD48/CD8A/CLEC2D/CX3CR1/FCN1/IGHA1/IL2RB/IL2RG/IL7R/ITGB2/KLRK1/MS4A1/PTPRC/SLAMF7/TRBC1	19
CC	GO:0001772	immunological synapse	6/66	44/19550	7.48898e-09	4.64317e-07	3.62624e-07	CD3E/CD53/CORO1A/GZMA/GZMB/SKAP1	6
CC	GO:0042101	T cell receptor complex	7/66	148/19550	6.6244e-07	2.63105e-05	2.05481e-05	CD3D/CD3E/CD3G/CD8A/SKAP1/TRAT1/TRBC1	7
CC	GO:0098802	plasma membrane signaling receptor complex	9/66	306/19550	8.48727e-07	2.63105e-05	2.05481e-05	CD3D/CD3E/CD3G/CD8A/IL2RB/ITGB2/SKAP1/TRAT1/TRBC1	9
CC	GO:0045121	membrane raft	9/66	335/19550	1.79428e-06	3.70819e-05	2.89604e-05	CD48/CD8A/FYN/ITGB2/KCNA3/LCP2/MS4A1/PTPRC/SKAP1	9
CC	GO:0098857	membrane microdomain	9/66	335/19550	1.79428e-06	3.70819e-05	2.89604e-05	CD48/CD8A/FYN/ITGB2/KCNA3/LCP2/MS4A1/PTPRC/SKAP1	9
CC	GO:0044853	plasma membrane raft	5/66	116/19550	4.51563e-05	0.000799911	0.000624718	CD8A/ITGB2/LCP2/MS4A1/SKAP1	5
CC	GO:0030666	endocytic vesicle membrane	5/66	193/19550	0.000488464	0.0075712	0.00591299	CD3D/CD3G/CORO1A/IL7R/RAC2	5
CC	GO:0005884	actin filament	4/66	114/19550	0.000598266	0.00824277	0.00643748	CORO1A/FYN/LCP1/RAC2	4
CC	GO:0030669	clathrin-coated endocytic vesicle membrane	3/66	72/19550	0.00185602	0.0230146	0.0179741	CD3D/CD3G/IL7R	3
CC	GO:0044305	calyx of Held	2/66	20/19550	0.00205066	0.0231165	0.0180536	KCNA3/PRKCB	2
CC	GO:0045334	clathrin-coated endocytic vesicle	3/66	91/19550	0.00361237	0.0373278	0.0291524	CD3D/CD3G/IL7R	3
CC	GO:0001891	phagocytic cup	2/66	28/19550	0.00400939	0.0382434	0.0298675	CORO1A/LCP1	2
CC	GO:0030139	endocytic vesicle	5/66	336/19550	0.00552458	0.048932	0.0382151	CD3D/CD3G/CORO1A/IL7R/RAC2	5
CC	GO:0005911	cell-cell junction	6/66	494/19550	0.00637933	0.0527358	0.0411858	CD3E/CD53/CORO1A/ITK/LCP2/SKAP1	6
CC	GO:0030665	clathrin-coated vesicle membrane	3/66	116/19550	0.00709961	0.055022	0.0429713	CD3D/CD3G/IL7R	3
MF	GO:0042608	T cell receptor binding	3/64	11/18368	6.52558e-06	0.00121376	0.000954796	CD3E/CD3G/FYN	3
MF	GO:0004896	cytokine receptor activity	5/64	97/18368	2.20571e-05	0.00177278	0.00139455	CCR7/CX3CR1/IL2RB/IL2RG/IL7R	5
MF	GO:0003823	antigen binding	6/64	171/18368	2.85932e-05	0.00177278	0.00139455	CD48/FCN1/IGHA1/IGLV1-44/IL7R/TRBC1	6
MF	GO:0140375	immune receptor activity	5/64	144/18368	0.000145208	0.00675216	0.00531155	CCR7/CX3CR1/IL2RB/IL2RG/IL7R	5
MF	GO:0023023	MHC protein complex binding	3/64	36/18368	0.00026535	0.00987104	0.00776499	CD8A/HLA-DMB/MS4A1	3
MF	GO:0030159	signaling receptor complex adaptor activity	3/64	50/18368	0.000703538	0.0218097	0.0171565	CD3E/CD3G/TRAT1	3
MF	GO:0004698	calcium-dependent protein kinase C activity	2/64	16/18368	0.00138971	0.0290133	0.0228231	PRKCB/PRKCH	2
MF	GO:0016004	phospholipase activator activity	2/64	16/18368	0.00138971	0.0290133	0.0228231	CCL5/FYN	2
MF	GO:0019955	cytokine binding	4/64	139/18368	0.00140387	0.0290133	0.0228231	CCR7/CX3CR1/IL2RB/IL2RG	4
MF	GO:0004697	protein kinase C activity	2/64	17/18368	0.00157147	0.0292294	0.0229931	PRKCB/PRKCH	2
MF	GO:0060229	lipase activator activity	2/64	18/18368	0.00176394	0.0298267	0.023463	CCL5/FYN	2
MF	GO:0035591	signaling adaptor activity	3/64	81/18368	0.00283639	0.0347536	0.0273387	CD3E/CD3G/TRAT1	3
MF	GO:0009931	calcium-dependent protein serine/threonine kinase activity	2/64	23/18368	0.00288431	0.0347536	0.0273387	PRKCB/PRKCH	2
MF	GO:0016493	C-C chemokine receptor activity	2/64	23/18368	0.00288431	0.0347536	0.0273387	CCR7/CX3CR1	2
MF	GO:0010857	calcium-dependent protein kinase activity	2/64	24/18368	0.00313948	0.0347536	0.0273387	PRKCB/PRKCH	2
MF	GO:0019957	C-C chemokine binding	2/64	24/18368	0.00313948	0.0347536	0.0273387	CCR7/CX3CR1	2
MF	GO:0004252	serine-type endopeptidase activity	4/64	174/18368	0.00317641	0.0347536	0.0273387	GZMA/GZMB/GZMH/GZMK	4
MF	GO:0001637	G protein-coupled chemoattractant receptor activity	2/64	26/18368	0.00368032	0.0360284	0.0283415	CCR7/CX3CR1	2
MF	GO:0004950	chemokine receptor activity	2/64	26/18368	0.00368032	0.0360284	0.0283415	CCR7/CX3CR1	2
MF	GO:0023026	MHC class II protein complex binding	2/64	27/18368	0.00396585	0.0368824	0.0290133	HLA-DMB/MS4A1	2
MF	GO:0008236	serine-type peptidase activity	4/64	191/18368	0.00442737	0.0392138	0.0308473	GZMA/GZMB/GZMH/GZMK	4
MF	GO:0017171	serine hydrolase activity	4/64	195/18368	0.00476375	0.0402753	0.0316824	GZMA/GZMB/GZMH/GZMK	4
MF	GO:0019956	chemokine binding	2/64	33/18368	0.00588615	0.0476011	0.0374451	CCR7/CX3CR1	2
MF	GO:0043548	phosphatidylinositol 3-kinase binding	2/64	34/18368	0.00624007	0.0483605	0.0380425	CORO1A/FYN	2
