# Supplementary material for: Study of TRAF3IP3 for prognosis and immune infiltration in hepatocellular carcinoma
Source: PeerJ. 2024 Dec 12;12:e18538. doi: 10.7717/peerj.18538 (PMC11646420; doi:10.7717/peerj.18538)
Supplement: Supplemental Information 12 [file peerj-12-18538-s012.xlsx]

## Sheet: Sheet1
ID	Description	setSize	enrichmentScore	NES	pvalue	p.adjust	qvalues	rank	leading_edge	core_enrichment
GOBP_ACTIVATION_OF_IMMUNE_RESPONSE	GOBP_ACTIVATION_OF_IMMUNE_RESPONSE	426	0.658603	2.54005	1e-10	9.09444e-09	7.29386e-09	1919	tags=35%, list=10%, signal=33%	FCN1/TRBC1/HLA-DRB4/IGHA1/PTPRC/IGHM/IGLV1-44/TRAT1/CD3D/MS4A1/PTPN22/PRKCB/ITK/CD3G/MNDA/FYN/C7/CD38/CCR7/SKAP1/PRKCH/CD3E/LCP2/HLA-DRB5/THEMIS/CD4/WIPF1/FCGR2B/FCER1G/HLA-DPA1/FGR/FCRL3/HCK/PYHIN1/LAPTM5/CRP/MFAP4/COLEC10/HLA-DRB1/HLA-DPB1/FCGR3A/LPXN/CFP/FCGR2A/GBP1/KLRD1/CLEC4A/PSMB9/LCK/SYK/PTPN6/HLA-DQA1/PIK3CD/PDE4B/CD226/FCN3/LYN/C9/BTN3A1/BTN3A3/C1QB/HLA-DRA/AIM2/C1QC/CD300A/BTN3A2/SH2D1…
GOBP_ADAPTIVE_IMMUNE_RESPONSE	GOBP_ADAPTIVE_IMMUNE_RESPONSE	404	0.733477	2.80837	1e-10	9.09444e-09	7.29386e-09	1811	tags=45%, list=10%, signal=41%	TRBC1/HLA-DRB4/KLRK1/CD48/IGHA1/IL7R/PTPRC/IGHM/IGLV1-44/TRAT1/CD8A/IL23A/CD3D/PRKCB/ITK/PRF1/CD3G/FYN/C7/SLAMF7/HLA-DMB/SKAP1/CD3E/HLA-DRB5/IL13RA2/THEMIS/SLAMF6/CD74/CD4/FCGR2B/FCER1G/CTSS/HLA-DPA1/HLA-DMA/SASH3/LILRB2/CRP/HLA-DOA/SAMSN1/JAK3/TNFSF13B/HLA-DRB1/HLA-DPB1/BTLA/CCR2/LEF1/ANXA1/HLA-DOB/TAP1/KLRD1/GPR183/CLEC4A/GAPT/SYK/CD84/PTPN6/HLA-DQA1/PIK3CD/IL17RA/PRDM1/CD226/CD86/LYN/C9/BTN3A1…
GOBP_ADAPTIVE_IMMUNE_RESPONSE_BASED_ON_SOMATIC_RECOMBINATION_OF_IMMUNE_RECEPTORS_BUILT_FROM_IMMUNOGLOBULIN_SUPERFAMILY_DOMAINS	GOBP_ADAPTIVE_IMMUNE_RESPONSE_BASED_ON_SOMATIC_RECOMBINATION_OF_IMMUNE_RECEPTORS_BUILT_FROM_IMMUNOGLOBULIN_SUPERFAMILY_DOMAINS	252	0.676761	2.4943	1e-10	9.09444e-09	7.29386e-09	2065	tags=42%, list=11%, signal=38%	TRBC1/IGHA1/IL7R/PTPRC/IGHM/IGLV1-44/CD8A/IL23A/PRF1/C7/IL13RA2/SLAMF6/CD74/CD4/FCGR2B/FCER1G/SASH3/CRP/JAK3/TNFSF13B/HLA-DRB1/CCR2/LEF1/ANXA1/KLRD1/GAPT/PTPN6/CD226/C9/BTN3A3/C1QB/IRF4/HLA-DRA/CD1C/TLR8/C1QC/SPN/BTN3A2/INPP5D/KLHL6/TNFRSF1B/RAB27A/MYD88/HLA-F/IL33/C1QA/NFKBIZ/ICAM1/CD1A/HLA-E/TNFAIP3/HLA-B/C8B/BTK/IL1B/SEMA4A/MEF2C/HLA-DQB1/CD1B/CLEC4G/C8A/CXCL13/CD1E/CD27/APCS/MALT1/TLR4/PRKCD/…
GOBP_ALPHA_BETA_T_CELL_ACTIVATION	GOBP_ALPHA_BETA_T_CELL_ACTIVATION	142	0.690039	2.38903	1e-10	9.09444e-09	7.29386e-09	1708	tags=39%, list=9%, signal=36%	PTPRC/IL23A/PTPN22/ITK/CD3E/SLAMF6/BCL11B/PTGER4/DOCK2/SASH3/JAK3/HLA-DRB1/CCR2/LEF1/ANXA1/RUNX3/GPR183/CLEC4A/SYK/ELF4/TNFSF8/PRDM1/CD86/IRF4/HLA-DRA/SPN/PLA2G2D/CD300A/IRF1/BCL2/ITPKB/NFKBIZ/HLA-E/CD83/NCKAP1L/SEMA4A/MALT1/WDFY4/ZAP70/LY9/LGALS9/EOMES/IL12RB1/PRKCQ/RIPK2/IL4R/GATA3/HLA-A/IFNG/TNFSF18/ZC3H12A/CD80/CD28/CD81/STAT3/LILRB1
GOBP_ANTIGEN_RECEPTOR_MEDIATED_SIGNALING_PATHWAY	GOBP_ANTIGEN_RECEPTOR_MEDIATED_SIGNALING_PATHWAY	232	0.707053	2.59023	1e-10	9.09444e-09	7.29386e-09	1667	tags=37%, list=9%, signal=34%	TRBC1/HLA-DRB4/IGHA1/PTPRC/IGHM/TRAT1/CD3D/MS4A1/PTPN22/PRKCB/ITK/CD3G/MNDA/FYN/CD38/CCR7/SKAP1/PRKCH/CD3E/LCP2/HLA-DRB5/THEMIS/CD4/FCGR2B/HLA-DPA1/FCRL3/LAPTM5/HLA-DRB1/HLA-DPB1/LPXN/GBP1/PSMB9/LCK/SYK/PTPN6/HLA-DQA1/PIK3CD/PDE4B/CD226/LYN/BTN3A1/BTN3A3/HLA-DRA/CD300A/BTN3A2/SH2D1A/INPP5D/KLHL6/BCL2/NFKBIZ/CD79A/PSMB8/PLCL2/NCKAP1L/BTK/NFATC2/BLNK/ELF1/MEF2C/HLA-DQB1/CD22/CTLA4/PAG1/CD247/MALT1/…
GOBP_B_CELL_ACTIVATION	GOBP_B_CELL_ACTIVATION	243	0.659737	2.43346	1e-10	9.09444e-09	7.29386e-09	1892	tags=36%, list=10%, signal=33%	TRBC1/IKZF3/IGHA1/IL7R/PTPRC/IGHM/MS4A1/PRKCB/ITM2A/MNDA/CD38/ITGA4/POU2AF1/BST1/VCAM1/DOCK11/CD74/SLAMF8/FCGR2B/FCRL3/SASH3/LAPTM5/SAMSN1/JAK3/TNFSF13B/LEF1/DOCK10/GPR183/GAPT/SYK/PTPN6/PIK3CD/CD86/LYN/RASGRP1/BANK1/CD300A/INPP5D/BCL2/PTK2B/CD79A/PLCL2/TNFAIP3/FCRL1/NCKAP1L/BTK/NFATC2/BLNK/ATM/MEF2C/CD22/CTLA4/CD27/TYROBP/CASP8/ST3GAL1/MALT1/ZAP70/TLR4/PRKCD/NOTCH2/MFNG/IL7/SH3KBP1/BST2/VAV3/FLT…
GOBP_B_CELL_PROLIFERATION	GOBP_B_CELL_PROLIFERATION	92	0.76982	2.53511	1e-10	9.09444e-09	7.29386e-09	1614	tags=42%, list=8%, signal=39%	IKZF3/IL7R/PTPRC/MS4A1/MNDA/CD38/BST1/CD74/FCGR2B/FCRL3/SASH3/TNFSF13B/LEF1/GPR183/GAPT/LYN/RASGRP1/CD300A/INPP5D/BCL2/CD79A/PLCL2/NCKAP1L/BTK/NFATC2/ATM/MEF2C/CD22/CTLA4/TYROBP/TLR4/PRKCD/IL7/VAV3/CR2/CD40/CD40LG/IFNA21/CD81
GOBP_B_CELL_RECEPTOR_SIGNALING_PATHWAY	GOBP_B_CELL_RECEPTOR_SIGNALING_PATHWAY	62	0.858755	2.65559	1e-10	9.09444e-09	7.29386e-09	820	tags=52%, list=4%, signal=50%	TRBC1/IGHA1/PTPRC/IGHM/MS4A1/PTPN22/PRKCB/ITK/MNDA/CD38/PRKCH/FCGR2B/FCRL3/LPXN/LCK/SYK/PTPN6/PIK3CD/LYN/CD300A/KLHL6/BCL2/CD79A/PLCL2/NCKAP1L/BTK/NFATC2/BLNK/ELF1/MEF2C/CD22/CTLA4
GOBP_CELL_CHEMOTAXIS	GOBP_CELL_CHEMOTAXIS	268	0.604385	2.2382	1e-10	9.09444e-09	7.29386e-09	2014	tags=38%, list=11%, signal=34%	KLRK1/RAC2/CORO1A/S100A8/CCL5/IL23A/ITGB2/CXCL9/CX3CR1/S100A12/CH25H/BST1/CCR7/CXCL10/SAA1/VCAM1/CD74/SLAMF8/FCER1G/CXCR6/CXCL12/SMOC2/CXCL14/BIN2/CCL2/CCL18/CCR2/LEF1/ANXA1/PDGFRA/GPR183/AIF1/CXCR4/SYK/PIK3CD/CSF1R/PDE4B/HGF/LYN/CCR1/TIAM1/PTK2B/C5AR1/CXCL11/PADI2/CCR4/CCR5/CXCL2/C3AR1/IL16/PLA2G7/NCKAP1L/LBP/ALOX5/PREX1/GSTP1/RHOG/CXCL13/PTN/CCRL2/RPS19/LGALS3/PRKCD/MPP1/CALR/LGALS9/ARRB2/VAV3/…
GOBP_CELL_KILLING	GOBP_CELL_KILLING	164	0.724262	2.55029	1e-10	9.09444e-09	7.29386e-09	2224	tags=38%, list=12%, signal=34%	KLRK1/CORO1A/IL7R/PTPRC/IL23A/GNLY/PRF1/LYZ/S100A12/GZMB/SLAMF7/SLAMF6/FCGR2B/DNASE1L3/HLA-DRB1/CLEC7A/KLRD1/SYK/PTPN6/ITGAM/CD226/C9/HAMP/RASGRP1/RNF19B/HLA-DRA/CD1C/SH2D1A/CD5L/RAB27A/HLA-F/SERPINB9/ICAM1/CD1A/HLA-E/HLA-B/CD1B/CD1E/TYROBP/CASP8/RPS19/LGALS9/ARRB2/KLRC1/IL12RB1/HAVCR2/NCR3/LYST/HLA-A/IFNG/STAP1/P2RX7/LILRB1/APOL1/MR1/VAV1/HLA-H/HRG/B2M/CTSH/RIPK3/PF4/CRK
GOBP_COMPLEMENT_ACTIVATION	GOBP_COMPLEMENT_ACTIVATION	72	0.768159	2.4313	1e-10	9.09444e-09	7.29386e-09	2055	tags=50%, list=11%, signal=45%	FCN1/TRBC1/IGHA1/IGHM/IGLV1-44/C7/CRP/MFAP4/COLEC10/CFP/FCN3/C9/C1QB/C1QC/CD5L/C1QA/C5AR1/C3AR1/C8B/COLEC11/IL1B/C8A/VTN/APCS/C1R/CR2/CFI/C2/CFB/C6/CD81/C1RL/C4BPA/IGKC/C1S/CLU
GOBP_DEFENSE_RESPONSE_TO_BACTERIUM	GOBP_DEFENSE_RESPONSE_TO_BACTERIUM	237	0.623129	2.28579	1e-10	9.09444e-09	7.29386e-09	2063	tags=29%, list=11%, signal=26%	TRBC1/S100A8/IGHA1/IL7R/IGHM/IL23A/GNLY/LCN2/LYZ/S100A12/MPEG1/SLAMF8/CD4/FCER1G/FGR/GBP4/CRP/PLAC8/IRF8/CYBA/CFP/PGC/SYK/TNFSF8/RNASE6/HAMP/SPN/MYD88/DEFB1/HLA-E/C5AR1/ISG15/LBP/GBP2/TLR2/ANG/NLRP1/PLA2G2A/CXCL13/FGA/AQP1/RPS19/TLR4/PRKCD/NOTCH2/HP/STAB1/HAVCR2/RIPK2/GBP7/SELP/LYST/HLA-A/SIRT2/CCL20/FGB/GRN/SLC11A1/PPBP/SYT11/NOD2/PYCARD/MR1/IGKC/RAB14/S100A9/PRG2/STAB2
GOBP_GRANULOCYTE_MIGRATION	GOBP_GRANULOCYTE_MIGRATION	134	0.66174	2.28198	1e-10	9.09444e-09	7.29386e-09	1982	tags=42%, list=10%, signal=38%	RAC2/S100A8/CCL5/IL23A/ITGB2/CXCL9/S100A12/BST1/CCR7/CXCL10/SAA1/CD74/SLAMF8/PTGER4/FCER1G/RHOH/CCL2/CCL18/ANXA1/SYK/PIK3CD/CSF1R/PDE4B/CD300A/MYD88/MCOLN2/C5AR1/CXCL11/CXCL2/C3AR1/NCKAP1L/LBP/PECAM1/PREX1/RHOG/CXCL13/WDR1/LGALS3/MPP1/VAV3/IRAK4/CX3CL1/CCL8/CCL20/TNFSF18/CD99/PIK3CG/PPBP/CSF3R/NOD2/MDK/VAV1/CCL19/PPIB/S100A9/CCL21
GOBP_HUMORAL_IMMUNE_RESPONSE	GOBP_HUMORAL_IMMUNE_RESPONSE	245	0.670601	2.47302	1e-10	9.09444e-09	7.29386e-09	1793	tags=33%, list=9%, signal=31%	FCN1/TRBC1/S100A8/IGHA1/PTPRC/IGHM/IGLV1-44/GNLY/MS4A1/LCN2/CXCL9/LYZ/C7/S100A12/POU2AF1/BST1/CCR7/CXCL10/FCGR2B/CXCL14/CRP/CCL2/MFAP4/COLEC10/HLA-DRB1/CFP/GPR183/PGC/PTPN6/FCN3/C9/RNASE6/C1QB/C1QC/TREM1/SH2D1A/CD5L/DEFB1/BCL2/C1QA/HLA-E/C5AR1/CXCL11/CD83/CXCL2/C3AR1/C8B/COLEC11/ALOX5/BLNK/IL1B/MEF2C/HLA-DQB1/ANG/C8A/PLA2G2A/CXCL13/FGA/VTN/APCS/RPS19/NOTCH2/C1R/IL7/CR2/CFI/GATA3/C2/HLA-A/IFNG/CFB…
GOBP_IMMUNE_RESPONSE_REGULATING_SIGNALING_PATHWAY	GOBP_IMMUNE_RESPONSE_REGULATING_SIGNALING_PATHWAY	382	0.657457	2.50579	1e-10	9.09444e-09	7.29386e-09	2659	tags=42%, list=14%, signal=37%	FCN1/TRBC1/HLA-DRB4/IGHA1/PTPRC/IGHM/IGLV1-44/TRAT1/CD3D/MS4A1/PTPN22/PRKCB/ITK/CD3G/MNDA/FYN/CD38/CCR7/SKAP1/PRKCH/CD3E/LCP2/HLA-DRB5/THEMIS/CD4/WIPF1/FCGR2B/FCER1G/HLA-DPA1/FGR/FCRL3/HCK/LILRB2/LAPTM5/HLA-DRB1/HLA-DPB1/FCGR3A/FCER1A/BTLA/LPXN/FCGR2A/GBP1/KLRD1/CLEC4A/PSMB9/LCK/SYK/PTPN6/HLA-DQA1/PIK3CD/PDE4B/CD226/LYN/BTN3A1/BTN3A3/HLA-DRA/CD300A/BTN3A2/SH2D1A/INPP5D/KLHL6/BCL2/NFKBIZ/FPR1/C5AR…
GOBP_INTERFERON_GAMMA_MEDIATED_SIGNALING_PATHWAY	GOBP_INTERFERON_GAMMA_MEDIATED_SIGNALING_PATHWAY	88	0.772786	2.51828	1e-10	9.09444e-09	7.29386e-09	2004	tags=58%, list=11%, signal=52%	HLA-DRB4/HLA-DRB5/NLRC5/VCAM1/HLA-DPA1/HCK/CD44/HLA-DRB1/IRF8/HLA-DPB1/GBP1/IFI30/MT2A/TRIM22/HLA-DQA1/OAS2/IRF4/PTAFR/HLA-DRA/IRF1/STAT1/HLA-F/CIITA/ICAM1/HLA-E/HLA-B/GBP2/HLA-DQB1/HLA-C/OASL/TRIM31/NCAM1/IRF9/PRKCD/JAK2/TRIM68/HLA-A/TP53/IFNG/TRIM8/TRIM25/PIAS1/PTPN2/TXK/HPX/IFNGR2/SOCS3/TRIM38/HLA-H/NR1H3/B2M
GOBP_INTERFERON_GAMMA_PRODUCTION	GOBP_INTERFERON_GAMMA_PRODUCTION	103	0.733834	2.46325	1e-10	9.09444e-09	7.29386e-09	2315	tags=50%, list=12%, signal=44%	IL23A/PTPN22/CD96/CCR7/CD3E/SLAMF6/CD2/HLA-DPA1/SASH3/LAPTM5/HLA-DRB1/IRF8/HLA-DPB1/CLEC7A/CCR2/PDE4B/CD226/BTN3A1/RASGRP1/TLR8/SPN/BTN3A2/IL33/ISG15/IL1B/CD14/CD244/TLR4/LGALS9/IL12RB1/HAVCR2/RIPK2/GATA3/HLA-A/PDCD1LG2/ZC3H12A/TLR7/TXK/SLC11A1/LILRB1/PRNP/IL12RB2/NOD2/PYCARD/INHBA/RIPK3/PDE4D/SIRPA/AXL/IL1RL1/CR1
GOBP_INTERLEUKIN_6_PRODUCTION	GOBP_INTERLEUKIN_6_PRODUCTION	128	0.665537	2.26426	1e-10	9.09444e-09	7.29386e-09	2659	tags=50%, list=14%, signal=43%	PTPN22/C1QTNF3/POU2AF1/CD74/NLRC3/LILRB2/IRAK3/CYBA/CLEC7A/AIF1/SYK/PTPN6/IL17RA/HGF/KLF2/PTAFR/TLR8/BANK1/INPP5D/MYD88/ORM1/IL33/TNFAIP3/HLA-B/IL16/NCKAP1L/LILRA2/LBP/IL1B/TLR2/TYROBP/TLR4/NLRP12/LGALS9/ARRB2/IL17D/IL1RAP/HAVCR2/RIPK2/CX3CL1/IFNG/SLAMF1/ZC3H12A/CD200/EREG/TLR7/STAT3/XBP1/SYT11/NOD2/TLR1/PYCARD/F2R/LILRA5/ARRB1/SIRPA/TWIST1/MAPKAPK2/TREM2/APP/ARHGEF2/SIGLEC16/CSK/LILRB4
GOBP_LEUKOCYTE_CELL_CELL_ADHESION	GOBP_LEUKOCYTE_CELL_CELL_ADHESION	337	0.66221	2.49436	1e-10	9.09444e-09	7.29386e-09	1913	tags=38%, list=10%, signal=35%	KLRK1/RAC2/CORO1A/S100A8/SELL/IL7R/PTPRC/CCL5/IL23A/PTPN22/ITGB2/CX3CR1/FYN/ITGA4/DOCK8/IDO1/CCR7/HLA-DMB/SKAP1/CD3E/FGL2/VCAM1/CD74/CD4/ITGAL/FCGR2B/HLA-DPA1/FERMT3/RHOH/CXCL12/SASH3/LILRB2/CD44/LAPTM5/CCL2/JAK3/TNFSF13B/HLA-DRB1/HLA-DPB1/BTLA/CCR2/LEF1/ANXA1/ETS1/ITGB7/RUNX3/AIF1/LCK/SYK/PTPN6/CD86/JAM2/LYN/PTAFR/HLA-DRA/SPN/PLA2G2D/CD300A/IRF1/ITPKB/NFKBIZ/ICAM1/KLF4/SELPLG/SEMA4D/HLA-E/AKT1/C…
GOBP_LEUKOCYTE_CHEMOTAXIS	GOBP_LEUKOCYTE_CHEMOTAXIS	201	0.610595	2.20552	1e-10	9.09444e-09	7.29386e-09	2014	tags=39%, list=11%, signal=36%	KLRK1/RAC2/CORO1A/S100A8/CCL5/IL23A/ITGB2/CXCL9/S100A12/CH25H/BST1/CCR7/CXCL10/SAA1/CD74/SLAMF8/FCER1G/CXCL12/CXCL14/CCL2/CCL18/CCR2/ANXA1/GPR183/AIF1/CXCR4/SYK/PIK3CD/CSF1R/PDE4B/LYN/CCR1/PTK2B/C5AR1/CXCL11/PADI2/CCR5/CXCL2/C3AR1/IL16/PLA2G7/NCKAP1L/LBP/ALOX5/PREX1/CXCL13/PTN/RPS19/LGALS3/MPP1/CALR/LGALS9/VAV3/LGMN/DDT/LYST/CREB3/CX3CL1/VEGFB/STAP1/MST1/HSD3B7/CCL8/CCL20/TNFSF18/GPSM3/PIK3CG/DUS…
GOBP_LEUKOCYTE_DIFFERENTIATION	GOBP_LEUKOCYTE_DIFFERENTIATION	498	0.609985	2.38551	1e-10	9.09444e-09	7.29386e-09	1826	tags=29%, list=10%, signal=27%	IKZF3/IL7R/PTPRC/EVI2B/CD8A/IL23A/CD3D/MS4A1/PTPN22/ITK/ITM2A/CD3G/ITGA4/POU2AF1/IKZF1/CCR7/CD3E/MMP9/RASSF2/FGL2/VCAM1/THEMIS/SLAMF6/DOCK11/CD74/SLAMF8/CD4/BCL11B/PTGER4/FCGR2B/CD2/FCER1G/MT1G/FCRL3/RHOH/DOCK2/SASH3/LILRB2/HLA-DOA/JAK3/HLA-DRB1/IRF8/CCR2/LEF1/ANXA1/HCLS1/DOCK10/RUNX3/GPR183/LCK/SYK/PTPN6/PIK3CD/TNFSF8/CSF1R/PRDM1/CD86/LYN/IRF4/CCR1/HLA-DRA/C1QC/SPN/PLA2G2D/IRF1/INPP5D/BCL2/PTK2B…
GOBP_LEUKOCYTE_MEDIATED_CYTOTOXICITY	GOBP_LEUKOCYTE_MEDIATED_CYTOTOXICITY	106	0.740552	2.49563	1e-10	9.09444e-09	7.29386e-09	1366	tags=38%, list=7%, signal=35%	KLRK1/CORO1A/IL7R/PTPRC/IL23A/PRF1/GZMB/SLAMF7/SLAMF6/FCGR2B/DNASE1L3/HLA-DRB1/KLRD1/PTPN6/ITGAM/CD226/RASGRP1/RNF19B/HLA-DRA/CD1C/SH2D1A/RAB27A/HLA-F/SERPINB9/ICAM1/CD1A/HLA-E/HLA-B/CD1B/CD1E/TYROBP/LGALS9/ARRB2/KLRC1/IL12RB1/HAVCR2/NCR3/LYST/HLA-A/STAP1
GOBP_LEUKOCYTE_MIGRATION	GOBP_LEUKOCYTE_MIGRATION	422	0.578888	2.23031	1e-10	9.09444e-09	7.29386e-09	2434	tags=39%, list=13%, signal=34%	KLRK1/RAC2/CORO1A/S100A8/SELL/CD48/IGHA1/IGHM/IGLV1-44/CCL5/IL23A/ITGB2/CXCL9/CX3CR1/FYN/S100A12/ITGA4/CH25H/DOCK8/BST1/CCR7/CXCL10/SAA1/MMP9/VCAM1/CD74/SLAMF8/ITGAL/PTGER4/CD2/FCER1G/HCK/RHOH/CXCL12/CXCL14/CD44/CCL2/CCL18/CCR2/ANXA1/ITGB7/GPR183/AIF1/CXCR4/LCK/SYK/SLC7A7/CD84/PTPN6/PIK3CD/CSF1R/PDE4B/ITGAM/JAM2/LYN/CCR1/PTAFR/SDC3/TREM1/SPN/CD300A/BMP5/INPP5D/MYD88/MCOLN2/PTK2B/IL33/ICAM1/SELPLG…
GOBP_LEUKOCYTE_PROLIFERATION	GOBP_LEUKOCYTE_PROLIFERATION	295	0.647301	2.40746	1e-10	9.09444e-09	7.29386e-09	1726	tags=37%, list=9%, signal=34%	RAC2/CORO1A/IKZF3/IL7R/PTPRC/CCL5/IL23A/MS4A1/PTPN22/MNDA/FYN/CD38/DOCK8/IDO1/BST1/HLA-DMB/CD3E/VCAM1/CD74/CD4/FCGR2B/HLA-DPA1/FCRL3/DOCK2/SASH3/LILRB2/LST1/CRP/JAK3/TNFSF13B/HLA-DRB1/HLA-DPB1/CCR2/LEF1/ANXA1/GPR183/GAPT/AIF1/SYK/ELF4/PTPN6/TNFSF8/CSF1R/CD86/LYN/BTN3A1/RASGRP1/SPN/PLA2G2D/CD300A/IRF1/INPP5D/TNFRSF1B/MYD88/BCL2/IL33/HLA-E/CD79A/CCND3/PLCL2/TNFAIP3/NCKAP1L/BTK/NFATC2/MSN/GPNMB/IL1B…
GOBP_LYMPHOCYTE_ACTIVATION_INVOLVED_IN_IMMUNE_RESPONSE	GOBP_LYMPHOCYTE_ACTIVATION_INVOLVED_IN_IMMUNE_RESPONSE	177	0.667555	2.36854	1e-10	9.09444e-09	7.29386e-09	1708	tags=38%, list=9%, signal=35%	CORO1A/PTPRC/IL23A/ITM2A/LCP1/POU2AF1/HLA-DMB/FGL2/SLAMF6/DOCK11/CD74/ITGAL/PTGER4/FCGR2B/FCER1G/JAK3/HLA-DRB1/LEF1/ANXA1/DOCK10/APBB1IP/GPR183/GAPT/CD86/IRF4/HLA-DRA/CD1C/SPN/RAB27A/HLA-F/PTK2B/NFKBIZ/ICAM1/PLCL2/SEMA4A/CD244/ST3GAL1/MALT1/LGALS3/TLR4/NOTCH2/MFNG/LY9/LGALS9/EOMES/IL12RB1/HAVCR2/RIPK2/RNF168/IL4R/GATA3/CD40/PCK1/TP53/IFNG/CD40LG/TNFSF18/ZC3H12A/IFNA21/CD80/CD28/LGALS1/CD81/STAT3/…
GOBP_LYMPHOCYTE_MEDIATED_IMMUNITY	GOBP_LYMPHOCYTE_MEDIATED_IMMUNITY	242	0.693024	2.55017	1e-10	9.09444e-09	7.29386e-09	2065	tags=40%, list=11%, signal=37%	TRBC1/KLRK1/CORO1A/IGHA1/IL7R/PTPRC/IGHM/IGLV1-44/CD8A/IL23A/CD96/PRF1/C7/GZMB/SLAMF7/IL13RA2/SLAMF6/CD74/FCGR2B/FCER1G/SASH3/CRP/HLA-DRB1/CCR2/KLRD1/GAPT/PTPN6/CD226/C9/BTN3A3/C1QB/RASGRP1/RNF19B/HLA-DRA/CD1C/TLR8/C1QC/BTN3A2/SH2D1A/INPP5D/TNFRSF1B/RAB27A/MYD88/HLA-F/SERPINB9/C1QA/ICAM1/CD1A/HLA-E/HLA-B/C8B/BTK/IL1B/HLA-DQB1/CD1B/CLEC4G/C8A/CD1E/CD27/APCS/MALT1/PRKCD/C1R/LGALS9/ARRB2/KLRC1/IL12R…
GOBP_MONONUCLEAR_CELL_DIFFERENTIATION	GOBP_MONONUCLEAR_CELL_DIFFERENTIATION	393	0.648217	2.47849	1e-10	9.09444e-09	7.29386e-09	1826	tags=32%, list=10%, signal=30%	IKZF3/IL7R/PTPRC/CD8A/IL23A/CD3D/MS4A1/PTPN22/ITK/ITM2A/CD3G/ITGA4/POU2AF1/IKZF1/CCR7/CD3E/FGL2/VCAM1/THEMIS/SLAMF6/DOCK11/CD74/SLAMF8/CD4/BCL11B/PTGER4/FCGR2B/CD2/FCER1G/MT1G/FCRL3/RHOH/DOCK2/SASH3/LILRB2/HLA-DOA/JAK3/HLA-DRB1/IRF8/CCR2/LEF1/ANXA1/DOCK10/RUNX3/GPR183/LCK/SYK/PTPN6/PIK3CD/TNFSF8/CSF1R/PRDM1/CD86/LYN/IRF4/HLA-DRA/SPN/PLA2G2D/IRF1/INPP5D/BCL2/PTK2B/ITPKB/NFKBIZ/IFI16/MAFB/CD79A/PLC…
GOBP_MYELOID_LEUKOCYTE_MIGRATION	GOBP_MYELOID_LEUKOCYTE_MIGRATION	197	0.59655	2.14814	1e-10	9.09444e-09	7.29386e-09	2434	tags=43%, list=13%, signal=38%	RAC2/S100A8/CCL5/IL23A/ITGB2/CXCL9/CX3CR1/S100A12/BST1/CCR7/CXCL10/SAA1/CD74/SLAMF8/PTGER4/FCER1G/RHOH/CXCL12/CCL2/CCL18/CCR2/ANXA1/AIF1/SYK/PIK3CD/CSF1R/PDE4B/LYN/CCR1/CD300A/MYD88/MCOLN2/PTK2B/C5AR1/CXCL11/CXCL2/C3AR1/PLA2G7/NCKAP1L/LBP/PECAM1/PREX1/RHOG/CXCL13/WDR1/RPS19/LGALS3/MPP1/VAV3/LGMN/DDT/IRAK4/CREB3/CX3CL1/VEGFB/STAP1/MST1/CCL8/CCL20/TNFSF18/CD99/CD200/CD81/PIK3CG/DUSP1/PPBP/CSF3R/NOD…
GOBP_NATURAL_KILLER_CELL_ACTIVATION	GOBP_NATURAL_KILLER_CELL_ACTIVATION	78	0.77309	2.48503	1e-10	9.09444e-09	7.29386e-09	1222	tags=29%, list=6%, signal=28%	KLRK1/CORO1A/PTPRC/IL23A/PTPN22/ITGB2/SLAMF7/CD2/FGR/ELF4/PIK3CD/PRDM1/RASGRP1/RAB27A/HLA-F/HLA-E/IL21R/TYROBP/CASP8/CD244/ZBTB1/HAVCR2/NCR3
GOBP_NEGATIVE_REGULATION_OF_CELL_ACTIVATION	GOBP_NEGATIVE_REGULATION_OF_CELL_ACTIVATION	181	0.634907	2.25622	1e-10	9.09444e-09	7.29386e-09	1865	tags=38%, list=10%, signal=34%	PTPRC/PTPN22/MNDA/IDO1/FGL2/IL13RA2/CD74/FCGR2B/FGR/LILRB2/LST1/LAPTM5/SAMSN1/JAK3/HLA-DRB1/CCR2/ANXA1/PDGFRA/RUNX3/CD84/PTPN6/CD86/LYN/SPN/PLA2G2D/BANK1/CD300A/IRF1/INPP5D/HLA-F/TNFAIP3/BTK/GPNMB/FGL1/ATM/CLEC4G/CTLA4/HMOX1/TYROBP/PAG1/LGALS3/PRKCD/LGALS9/HAVCR2/IL4R/CX3CL1/LRRC32/PDCD1LG2/TNFSF18/ZC3H12A/BMP4/CD80/CST7/CD200/PTPN2/APOE/GRN/LAX1/CNR1/IL2RA/SYT11/SFRP1/LILRB1/PRNP/TNFRSF13B/MDK/I…
GOBP_NEGATIVE_REGULATION_OF_CYTOKINE_PRODUCTION	GOBP_NEGATIVE_REGULATION_OF_CYTOKINE_PRODUCTION	259	0.598317	2.21252	1e-10	9.09444e-09	7.29386e-09	2659	tags=41%, list=14%, signal=36%	PTPRC/IL23A/PTPN22/CD96/C1QTNF3/CX3CR1/IDO1/CCR7/NLRC5/NLRC3/PTGER4/FCGR2B/CARD16/SRGN/LAPTM5/JAK3/HLA-DRB1/IRAK3/LEF1/ANXA1/GBP1/CLEC4A/CD84/PTPN6/HGF/KLF2/TLR8/BANK1/TSPO/INPP5D/MEFV/ORM1/APOA1/HLA-F/ADCY7/IL33/KLF4/CD83/TNFAIP3/ISG15/NCKAP1L/LBP/BTK/GPNMB/GSTP1/HMOX1/TYROBP/NAV3/TLR4/NLRP12/NDRG2/CARD8/BST2/LGALS9/ARRB2/HAVCR2/EZR/INHBB/GATA3/CX3CL1/IFNG/REL/SLAMF1/TRIM25/LRRC32/RNF135/SERPINB…
GOBP_NEGATIVE_REGULATION_OF_DEFENSE_RESPONSE	GOBP_NEGATIVE_REGULATION_OF_DEFENSE_RESPONSE	183	0.656228	2.33593	1e-10	9.09444e-09	7.29386e-09	2871	tags=43%, list=15%, signal=37%	PTPRC/CD96/C1QTNF3/SAA1/FGL2/NLRC5/SLAMF8/NLRC3/PTGER4/FCGR2B/HLA-DRB1/IRAK3/KLRD1/AOAH/SAMHD1/HGF/HAMP/MEFV/TNFRSF1B/APOA1/HLA-F/SERPINB9/IFI16/KLF4/HLA-E/PTGIS/TNFAIP3/HLA-B/ALOX5/TEK/GSTP1/HTRA1/APCS/RPS19/PRKCD/NLRP12/LGALS9/ARRB2/KLRC1/HAVCR2/GATA3/CX3CL1/DUSP10/HLA-A/SIRT2/TRAFD1/RNF125/CST7/NFKB1/CD200/PTPN2/APOE/FNDC4/GRN/IL2RA/SOCS3/SYT11/LILRB1/NOD2/GPX1/MDK/MFHAS1/NR1H3/PPARA/LYAR/RB1/…
GOBP_NEGATIVE_REGULATION_OF_IMMUNE_RESPONSE	GOBP_NEGATIVE_REGULATION_OF_IMMUNE_RESPONSE	139	0.689663	2.39083	1e-10	9.09444e-09	7.29386e-09	2685	tags=47%, list=14%, signal=40%	IL7R/PTPRC/CD96/FGL2/NLRC5/IL13RA2/SLAMF8/NLRC3/FCGR2B/SAMSN1/JAK3/HLA-DRB1/IRAK3/CCR2/ANXA1/KLRD1/CD84/PTPN6/SAMHD1/LYN/CD300A/INPP5D/HLA-F/IL33/SERPINB9/IFI16/HLA-E/TNFAIP3/HLA-B/CLEC4G/CTLA4/HMOX1/RPS19/LGALS3/LGALS9/ARRB2/KLRC1/HAVCR2/IL4R/DUSP10/HLA-A/TRAFD1/TNFSF18/ZC3H12A/PTPN2/GRN/IL2RA/LILRB1/NOD2/GPX1/C4BPA/AMBP/NR1H3/LYAR/FCRLB/CRK/TNFRSF14/IL1RL1/CR1/TBX21/SERPING1/VSIG4/ARG1/LILRB4/T…
GOBP_NEGATIVE_REGULATION_OF_IMMUNE_SYSTEM_PROCESS	GOBP_NEGATIVE_REGULATION_OF_IMMUNE_SYSTEM_PROCESS	355	0.608039	2.30028	1e-10	9.09444e-09	7.29386e-09	2783	tags=44%, list=15%, signal=38%	KLRK1/IL7R/PTPRC/PTPN22/CD96/MNDA/IDO1/FGL2/NLRC5/IL13RA2/CD74/SLAMF8/NLRC3/PTGER4/FCGR2B/FGR/FCRL3/CXCL12/LILRB2/LST1/LAPTM5/HLA-DOA/CCL2/SAMSN1/JAK3/HLA-DRB1/IRAK3/CCR2/ANXA1/HLA-DOB/LPXN/GBP1/KLRD1/CD68/RUNX3/CD84/PTPN6/SAMHD1/CD86/LYN/C1QC/SPN/PLA2G2D/BANK1/CD300A/IRF1/BMP5/SH2D1A/INPP5D/APOA1/HLA-F/IL33/SERPINB9/IFI16/HLA-E/PADI2/AKT1/MAFB/PLCL2/TNFAIP3/HLA-B/BTK/GPNMB/FGL1/ATM/CLEC4G/CD22/C…
GOBP_PHAGOCYTOSIS	GOBP_PHAGOCYTOSIS	261	0.632478	2.338	1e-10	9.09444e-09	7.29386e-09	2390	tags=39%, list=13%, signal=35%	FCN1/TRBC1/RAC2/CORO1A/IGHA1/PTPRC/IGHM/IGLV1-44/IL2RB/ITGB2/CD3G/FYN/IL2RG/SRPX/ITGAL/WIPF1/FCGR2B/FCER1G/FGR/HCK/RHOH/DOCK2/ARHGAP25/BIN2/CRP/CCL2/IRF8/FCGR3A/CYBA/CLEC7A/ANXA1/FCGR2A/AIF1/SYK/MARCO/ITGAM/FCN3/LYN/GSN/CD300A/RAB27A/MYD88/NCF2/APOA1/NCKAP1L/LBP/PECAM1/IL1B/CD14/TLR2/CDC42SE1/RHOG/ARPC2/SIRPG/RAB31/RAPGEF1/SIRPB1/PTX3/TYROBP/CD247/CDC42SE2/TLR4/PRKCD/RHOBTB1/ICAM3/CALR/WASF2/VAV3…
GOBP_POSITIVE_REGULATION_OF_CELL_ACTIVATION	GOBP_POSITIVE_REGULATION_OF_CELL_ACTIVATION	320	0.643874	2.41137	1e-10	9.09444e-09	7.29386e-09	1925	tags=38%, list=10%, signal=35%	TRBC1/KLRK1/CORO1A/IGHA1/IL7R/PTPRC/IGHM/CCL5/IL23A/PTPN22/ITGB2/FYN/CD38/DOCK8/PLEK/BST1/CCR7/HLA-DMB/CD3E/VCAM1/CD74/CD4/CD2/HLA-DPA1/FGR/FCRL3/RHOH/SASH3/LILRB2/CCL2/JAK3/TNFSF13B/HLA-DRB1/HLA-DPB1/CLEC7A/BTLA/CCR2/LEF1/ANXA1/RUNX3/GPR183/AIF1/LCK/SYK/PTPN6/ITGAM/CD226/CD86/LYN/HAMP/PTAFR/HLA-DRA/INPP5D/MYD88/HLA-F/RPS6KA1/BCL2/ITPKB/IL33/NFKBIZ/HLA-E/AKT1/CD83/NCKAP1L/LILRA2/LBP/BTK/NFATC2/CD…
GOBP_POSITIVE_REGULATION_OF_CELL_ADHESION	GOBP_POSITIVE_REGULATION_OF_CELL_ADHESION	402	0.557892	2.13713	1e-10	9.09444e-09	7.29386e-09	1988	tags=33%, list=10%, signal=30%	KLRK1/CORO1A/IL7R/PTPRC/CCL5/IL23A/PTPN22/ITGB2/FYN/ITGA4/DOCK8/CCR7/HLA-DMB/SKAP1/SAA1/CD3E/VCAM1/CD74/CD4/HLA-DPA1/SPOCK2/RHOH/CXCL12/SASH3/LILRB2/CD44/CCL2/JAK3/TNFSF13B/HLA-DRB1/HLA-DPB1/BTLA/CCR2/LEF1/ANXA1/ETS1/APBB1IP/RUNX3/AIF1/LCK/SYK/PLEKHA2/PTPN6/CD86/LYN/PTAFR/HLA-DRA/CCDC80/APOA1/IQGAP1/PTK2B/ITPKB/NFKBIZ/ICAM1/HLA-E/FLNA/AKT1/CD83/STK4/NCKAP1L/ALOX5/PREX1/CD5/IL1B/ATM/TEK/ARPC2/SIRP…
GOBP_POSITIVE_REGULATION_OF_CELL_CELL_ADHESION	GOBP_POSITIVE_REGULATION_OF_CELL_CELL_ADHESION	261	0.653877	2.4171	1e-10	9.09444e-09	7.29386e-09	1988	tags=39%, list=10%, signal=35%	KLRK1/CORO1A/IL7R/PTPRC/CCL5/IL23A/PTPN22/ITGB2/FYN/ITGA4/DOCK8/CCR7/HLA-DMB/SKAP1/CD3E/VCAM1/CD74/CD4/HLA-DPA1/RHOH/SASH3/LILRB2/CD44/CCL2/JAK3/TNFSF13B/HLA-DRB1/HLA-DPB1/BTLA/CCR2/LEF1/ANXA1/ETS1/RUNX3/AIF1/LCK/SYK/PTPN6/CD86/LYN/PTAFR/HLA-DRA/ITPKB/NFKBIZ/ICAM1/HLA-E/AKT1/CD83/NCKAP1L/ALOX5/CD5/IL1B/SIRPG/CTLA4/SERPINF2/CXCL13/SIRPB1/FGA/CD27/MALT1/ZAP70/TNFSF14/IL7/LGALS9/IL12RB1/ZBTB1/RELA/H…
GOBP_POSITIVE_REGULATION_OF_CYTOKINE_PRODUCTION	GOBP_POSITIVE_REGULATION_OF_CYTOKINE_PRODUCTION	409	0.608898	2.33453	1e-10	9.09444e-09	7.29386e-09	2575	tags=37%, list=14%, signal=33%	FCN1/PTPRC/GBP5/IL23A/PTPN22/C1QTNF3/MNDA/POU2AF1/IDO1/CCR7/SAA1/CD3E/SLAMF6/CD74/CD4/PTGER4/CD2/FCER1G/HLA-DPA1/FGR/CASP1/PYHIN1/SASH3/LILRB2/LAPTM5/IRF8/HLA-DPB1/CYBA/CLEC7A/CCR2/ANXA1/HK1/AIF1/SYK/CSF1R/IL17RA/PDE4B/CD226/LTB/CD86/HGF/ORM2/IRF4/RASGRP1/PTAFR/AIM2/TLR8/SPN/IRF1/GPRC5B/MYD88/STAT1/ORM1/HLA-F/MCOLN2/IL33/IFI16/HLA-E/C5AR1/CD83/C3AR1/IL16/LILRA2/LBP/LUM/IL1B/CD14/TLR2/NLRP1/SERPIN…
GOBP_POSITIVE_REGULATION_OF_IMMUNE_EFFECTOR_PROCESS	GOBP_POSITIVE_REGULATION_OF_IMMUNE_EFFECTOR_PROCESS	201	0.645501	2.33161	1e-10	9.09444e-09	7.29386e-09	1913	tags=38%, list=10%, signal=34%	KLRK1/RAC2/PTPRC/IL23A/PTPN22/ITGB2/HLA-DMB/IL13RA2/SLAMF6/CD74/FGR/SASH3/LAPTM5/HLA-DRB1/CLEC7A/CCR2/ANXA1/KLRD1/HK1/PGC/SYK/CD84/ITGAM/CD226/CD86/LYN/RASGRP1/PTAFR/HLA-DRA/CD1C/CD300A/SH2D1A/GPRC5B/HLA-F/IL33/NFKBIZ/CD1A/HLA-E/HLA-B/LBP/BTK/IL1B/CD1B/RAPGEF1/HMOX1/CD1E/TYROBP/CD244/MALT1/RPS19/TLR4/LGALS9/IL12RB1/ZBTB1/RIPK2/NCR3/SH2D1B/IL4R/GATA3/CD40/PCK1/HLA-A/IFNG/STAP1/CD80/CD28/CD81/XBP1/…
GOBP_POSITIVE_REGULATION_OF_LEUKOCYTE_CELL_CELL_ADHESION	GOBP_POSITIVE_REGULATION_OF_LEUKOCYTE_CELL_CELL_ADHESION	224	0.686317	2.49848	1e-10	9.09444e-09	7.29386e-09	1913	tags=41%, list=10%, signal=37%	KLRK1/CORO1A/IL7R/PTPRC/CCL5/IL23A/PTPN22/ITGB2/FYN/ITGA4/DOCK8/CCR7/HLA-DMB/SKAP1/CD3E/VCAM1/CD74/CD4/HLA-DPA1/RHOH/SASH3/LILRB2/CD44/CCL2/JAK3/TNFSF13B/HLA-DRB1/HLA-DPB1/BTLA/CCR2/LEF1/ANXA1/ETS1/RUNX3/AIF1/LCK/SYK/PTPN6/CD86/LYN/PTAFR/HLA-DRA/ITPKB/NFKBIZ/ICAM1/HLA-E/AKT1/CD83/NCKAP1L/ALOX5/CD5/IL1B/SIRPG/CTLA4/SIRPB1/CD27/MALT1/ZAP70/TNFSF14/IL7/LGALS9/IL12RB1/ZBTB1/RELA/HAVCR2/PRKCQ/RIPK2/SE…
GOBP_POSITIVE_REGULATION_OF_RESPONSE_TO_EXTERNAL_STIMULUS	GOBP_POSITIVE_REGULATION_OF_RESPONSE_TO_EXTERNAL_STIMULUS	468	0.520617	2.0228	1e-10	9.09444e-09	7.29386e-09	2783	tags=36%, list=15%, signal=31%	FCN1/KLRK1/RAC2/S100A8/CCL5/GBP5/IL23A/MNDA/FYN/S100A12/IDO1/CCR7/CXCL10/NLRC5/SLAMF6/LY86/CD74/PTGER4/FCER1G/HCK/PYHIN1/CXCL12/SMOC2/CXCL14/CYBA/CCR2/ETS1/KLRD1/CLEC4A/PGC/AIF1/PSMB9/CXCR4/SYK/CSF1R/CD226/LYN/CCR1/RASGRP1/TIAM1/AIM2/TLR8/FABP4/SH2D1A/GPRC5B/HLA-F/PTK2B/IL33/NFKBIZ/IFI16/HLA-E/C5AR1/FLNA/CCR4/PSMB8/CLEC4E/C3AR1/IL16/PLA2G7/NCKAP1L/LILRA2/LBP/BTK/IL1B/NFKBIA/TLR2/SERPINF2/PLA2G2A/…
GOBP_REGULATION_OF_ADAPTIVE_IMMUNE_RESPONSE	GOBP_REGULATION_OF_ADAPTIVE_IMMUNE_RESPONSE	159	0.660779	2.32173	1e-10	9.09444e-09	7.29386e-09	2998	tags=50%, list=16%, signal=43%	CD48/IL7R/PTPRC/IL23A/SKAP1/CD4/FCGR2B/SASH3/SAMSN1/JAK3/TNFSF13B/HLA-DRB1/CCR2/ANXA1/KLRD1/PTPN6/CD226/HLA-DRA/CD1C/IRF1/TNFRSF1B/HLA-F/ADCY7/IL33/NFKBIZ/CD1A/HLA-E/TNFAIP3/HLA-B/BTK/IL1B/MEF2C/CD1B/CLEC4G/CD1E/MALT1/KLRC1/IL12RB1/ZBTB1/HAVCR2/PRKCQ/RIPK2/IL4R/GATA3/CD40/DUSP10/HLA-A/TNFSF18/ZC3H12A/CD80/CD28/CD81/HPX/SLC11A1/LILRB1/NOD2/C4BPA/PYCARD/MR1/HLA-H/CCL19/B2M/RIPK3/TNFRSF14/IL1RL1/CR1…
GOBP_REGULATION_OF_B_CELL_ACTIVATION	GOBP_REGULATION_OF_B_CELL_ACTIVATION	117	0.690337	2.33375	1e-10	9.09444e-09	7.29386e-09	1892	tags=42%, list=10%, signal=38%	TRBC1/IKZF3/IGHA1/PTPRC/IGHM/MNDA/CD38/BST1/CD74/SLAMF8/FCGR2B/FCRL3/SASH3/LAPTM5/SAMSN1/TNFSF13B/GPR183/SYK/PTPN6/LYN/BANK1/CD300A/INPP5D/BCL2/TNFAIP3/NCKAP1L/BTK/NFATC2/ATM/MEF2C/CD22/CTLA4/CD27/TYROBP/TLR4/IL7/SH3KBP1/VAV3/ZFP36L2/CD40/CD28/CD81/XBP1/SFRP1/NOD2/TNFRSF13B/INHBA/TBC1D10C/IGKC
GOBP_REGULATION_OF_CELL_CELL_ADHESION	GOBP_REGULATION_OF_CELL_CELL_ADHESION	401	0.589477	2.25821	1e-10	9.09444e-09	7.29386e-09	1913	tags=33%, list=10%, signal=30%	KLRK1/CORO1A/IL7R/PTPRC/CCL5/IL23A/PTPN22/ITGB2/FYN/ITGA4/DOCK8/IDO1/CCR7/HLA-DMB/SKAP1/CD3E/FGL2/VCAM1/CD74/CD4/FCGR2B/HLA-DPA1/FERMT3/RHOH/CXCL12/SASH3/LILRB2/CD44/LAPTM5/CCL2/JAK3/TNFSF13B/HLA-DRB1/HLA-DPB1/BTLA/CCR2/LEF1/ANXA1/ETS1/RUNX3/AKNA/AIF1/LCK/SYK/PTPN6/CD86/LYN/PTAFR/HLA-DRA/SPN/PLA2G2D/CD300A/IRF1/APOA1/ITPKB/NFKBIZ/ICAM1/KLF4/HLA-E/AKT1/CD83/ASS1/NCKAP1L/ALOX5/GPNMB/CD5/IL1B/FGL1/Z…
GOBP_REGULATION_OF_CELL_KILLING	GOBP_REGULATION_OF_CELL_KILLING	95	0.727593	2.40849	1e-10	9.09444e-09	7.29386e-09	1876	tags=45%, list=10%, signal=41%	KLRK1/IL7R/PTPRC/IL23A/PRF1/SLAMF6/FCGR2B/DNASE1L3/HLA-DRB1/CLEC7A/KLRD1/SYK/ITGAM/CD226/RASGRP1/HLA-DRA/CD1C/SH2D1A/CD5L/HLA-F/SERPINB9/ICAM1/CD1A/HLA-E/HLA-B/CD1B/CD1E/TYROBP/CASP8/LGALS9/ARRB2/KLRC1/IL12RB1/HAVCR2/NCR3/HLA-A/IFNG/STAP1/P2RX7/LILRB1/MR1/VAV1/HLA-H
GOBP_REGULATION_OF_HEMOPOIESIS	GOBP_REGULATION_OF_HEMOPOIESIS	350	0.595162	2.25358	1e-10	9.09444e-09	7.29386e-09	1708	tags=28%, list=9%, signal=26%	IKZF3/IL7R/PTPRC/EVI2B/IL23A/PRKCB/GPR171/RASSF2/FGL2/CD74/SLAMF8/CD4/FCGR2B/CD2/FCRL3/RHOH/SASH3/LILRB2/HLA-DOA/JAK3/HLA-DRB1/CCR2/LEF1/ANXA1/ETS1/HCLS1/RUNX3/SYK/PTPN6/PRDM1/CD86/LYN/IRF4/CCR1/HLA-DRA/C1QC/IRF1/INPP5D/STAT1/PTK2B/ITPKB/NFKBIZ/GP1BA/MAFB/CD83/HLA-B/SPI1/FOS/ISG15/NCKAP1L/BTK/NFATC2/NFKBIA/MEF2C/TCF7/CTLA4/PTN/CD27/TYROBP/CASP8/APCS/MALT1/LGALS3/ZAP70/TLR4/NOTCH2/IL7/LGALS9/IL17D…
GOBP_REGULATION_OF_IMMUNE_EFFECTOR_PROCESS	GOBP_REGULATION_OF_IMMUNE_EFFECTOR_PROCESS	375	0.636597	2.42243	1e-10	9.09444e-09	7.29386e-09	1913	tags=36%, list=10%, signal=33%	KLRK1/RAC2/IL7R/PTPRC/IGLV1-44/IL23A/PTPN22/CD96/ITGB2/C7/HLA-DMB/FGL2/IL13RA2/SLAMF6/CD74/SLAMF8/FCGR2B/FGR/FCRL3/SASH3/DNASE1L3/LAPTM5/JAK3/HLA-DRB1/IRAK3/CLEC7A/CCR2/ANXA1/CFP/KLRD1/HK1/PGC/SYK/CD84/PTPN6/ITGAM/CD226/CD86/LYN/C9/C1QB/IRF4/RASGRP1/PTAFR/HLA-DRA/CD1C/AIM2/C1QC/CD300A/SH2D1A/CD5L/TNFRSF1B/GPRC5B/STAT1/APOA1/HLA-F/IL33/SERPINB9/C1QA/NFKBIZ/ICAM1/CD1A/HLA-E/C5AR1/TNFAIP3/HLA-B/C3AR…
GOBP_REGULATION_OF_INFLAMMATORY_RESPONSE	GOBP_REGULATION_OF_INFLAMMATORY_RESPONSE	301	0.599992	2.23303	1e-10	9.09444e-09	7.29386e-09	2057	tags=36%, list=11%, signal=33%	S100A8/PTPRC/CCL5/IL23A/C1QTNF3/S100A12/IDO1/BST1/CCR7/SAA1/MMP9/SLAMF8/NLRC3/PTGER4/FCGR2B/CASP1/HCK/DNASE1L3/HLA-DRB1/CCR2/ANXA1/ETS1/AOAH/AKNA/HGF/LYN/HAMP/FABP4/PLA2G2D/MEFV/TNFRSF1B/GPRC5B/MYD88/APOA1/IL33/NFKBIZ/KLF4/HLA-E/PTGIS/ESR1/TNFAIP3/IL16/PLA2G7/LBP/BTK/BIRC3/ALOX5/IL1B/NFKBIA/ATM/TEK/GSTP1/TLR2/NLRP1/PLA2G2A/MGLL/APCS/RPS19/TLR4/PRKCD/NLRP12/DDT/RELA/JAK2/CREB3L3/LRRK2/CASP4/GATA3/…
GOBP_REGULATION_OF_INNATE_IMMUNE_RESPONSE	GOBP_REGULATION_OF_INNATE_IMMUNE_RESPONSE	294	0.559053	2.08042	1e-10	9.09444e-09	7.29386e-09	2617	tags=34%, list=14%, signal=30%	FCN1/KLRK1/CCL5/GBP5/PTPN22/CD96/MNDA/FYN/NLRC5/SLAMF6/SLAMF8/NLRC3/FCGR2B/FCER1G/FGR/HCK/PYHIN1/IRAK3/KLRD1/CLEC4A/PSMB9/SYK/PTPN6/SAMHD1/CD226/LYN/RASGRP1/AIM2/TLR8/IRF1/SH2D1A/STAT1/HLA-F/SERPINB9/IFI16/HLA-E/PSMB8/CLEC4E/TNFAIP3/HLA-B/LILRA2/LBP/BIRC3/TYROBP/MALT1/RPS19/TLR4/PRKCD/ICAM3/LGALS9/ARRB2/KLRC1/RELA/HAVCR2/JAK2/NCR3/SH2D1B/DUSP10/HLA-A/PRKACB/IFNG/TRAFD1/RNF135/NFKB1/PIAS1/PTPN2/ER…
GOBP_REGULATION_OF_LEUKOCYTE_DIFFERENTIATION	GOBP_REGULATION_OF_LEUKOCYTE_DIFFERENTIATION	262	0.621362	2.29684	1e-10	9.09444e-09	7.29386e-09	3024	tags=42%, list=16%, signal=36%	IKZF3/IL7R/PTPRC/EVI2B/IL23A/RASSF2/FGL2/CD74/SLAMF8/CD4/FCGR2B/CD2/FCRL3/RHOH/SASH3/LILRB2/HLA-DOA/JAK3/HLA-DRB1/CCR2/LEF1/ANXA1/HCLS1/RUNX3/SYK/PTPN6/PRDM1/CD86/LYN/IRF4/CCR1/HLA-DRA/C1QC/IRF1/INPP5D/ITPKB/NFKBIZ/MAFB/CD83/HLA-B/FOS/NCKAP1L/BTK/NFATC2/TCF7/CTLA4/CD27/TYROBP/CASP8/APCS/MALT1/ZAP70/TLR4/NOTCH2/IL7/LGALS9/IL12RB1/ZBTB1/RIPK2/ZFP36L2/IL4R/GATA3/DUSP10/FANCA/PCK1/TMEM176A/IFNG/GPR68…
GOBP_REGULATION_OF_LEUKOCYTE_MEDIATED_IMMUNITY	GOBP_REGULATION_OF_LEUKOCYTE_MEDIATED_IMMUNITY	195	0.644858	2.3098	1e-10	9.09444e-09	7.29386e-09	1876	tags=36%, list=10%, signal=33%	KLRK1/RAC2/IL7R/PTPRC/IL23A/CD96/ITGB2/IL13RA2/SLAMF6/FCGR2B/FGR/SASH3/DNASE1L3/JAK3/HLA-DRB1/CLEC7A/CCR2/KLRD1/SYK/CD84/PTPN6/ITGAM/CD226/LYN/RASGRP1/PTAFR/HLA-DRA/CD1C/CD300A/SH2D1A/TNFRSF1B/HLA-F/SERPINB9/ICAM1/CD1A/HLA-E/HLA-B/BTK/IL1B/CD1B/CLEC4G/HMOX1/CD1E/TYROBP/MALT1/TLR4/PRAM1/BST2/LGALS9/ARRB2/KLRC1/IL12RB1/ZBTB1/HAVCR2/NCR3/SH2D1B/IL4R/GATA3/CD40/HLA-A/STAP1/CD28/CD81/HPX/STX4/LILRB1/N…
GOBP_REGULATION_OF_LEUKOCYTE_MIGRATION	GOBP_REGULATION_OF_LEUKOCYTE_MIGRATION	186	0.634682	2.26194	1e-10	9.09444e-09	7.29386e-09	2652	tags=48%, list=14%, signal=42%	KLRK1/RAC2/CCL5/IL23A/CX3CR1/ITGA4/DOCK8/BST1/CCR7/CXCL10/CD74/SLAMF8/PTGER4/RHOH/CXCL12/CXCL14/CCL2/CCR2/ANXA1/AIF1/CSF1R/JAM2/LYN/CCR1/PTAFR/SPN/CD300A/BMP5/MYD88/PTK2B/IL33/ICAM1/C5AR1/PADI2/AKT1/C3AR1/PLA2G7/NCKAP1L/LBP/MSN/RHOG/STK10/CXCL13/HMOX1/PTN/LGALS3/MPP1/CALR/LGALS9/LGMN/DDT/SELP/CREB3/CX3CL1/VEGFB/STAP1/MST1/LRCH1/CCL8/CCL20/TNFSF18/CD99/GPSM3/CD200/CD81/DUSP1/NOD2/PYCARD/VEGFC/MDK/…
GOBP_REGULATION_OF_LEUKOCYTE_PROLIFERATION	GOBP_REGULATION_OF_LEUKOCYTE_PROLIFERATION	228	0.639854	2.33085	1e-10	9.09444e-09	7.29386e-09	1811	tags=39%, list=10%, signal=35%	RAC2/CORO1A/IKZF3/PTPRC/CCL5/IL23A/PTPN22/MNDA/CD38/IDO1/BST1/HLA-DMB/CD3E/VCAM1/CD74/CD4/FCGR2B/HLA-DPA1/FCRL3/SASH3/LILRB2/LST1/CRP/JAK3/TNFSF13B/HLA-DRB1/HLA-DPB1/CCR2/ANXA1/GPR183/AIF1/SYK/PTPN6/TNFSF8/CSF1R/CD86/LYN/SPN/PLA2G2D/CD300A/IRF1/INPP5D/TNFRSF1B/MYD88/BCL2/IL33/HLA-E/TNFAIP3/NCKAP1L/BTK/NFATC2/GPNMB/IL1B/ATM/GSTP1/MEF2C/CLEC4G/CD22/CTLA4/TYROBP/LGALS3/ZAP70/TLR4/IL7/BST2/LGALS9/VAV…
GOBP_REGULATION_OF_LYMPHOCYTE_ACTIVATION	GOBP_REGULATION_OF_LYMPHOCYTE_ACTIVATION	411	0.637668	2.44493	1e-10	9.09444e-09	7.29386e-09	1913	tags=36%, list=10%, signal=33%	TRBC1/KLRK1/RAC2/CORO1A/IKZF3/IGHA1/IL7R/PTPRC/IGHM/CCL5/IL23A/PTPN22/MNDA/FYN/CD38/DOCK8/IDO1/BST1/CCR7/HLA-DMB/CD3E/FGL2/VCAM1/CD74/SLAMF8/CD4/FCGR2B/CD2/HLA-DPA1/FGR/FCRL3/RHOH/SASH3/LILRB2/LST1/LAPTM5/HLA-DOA/CCL2/SAMSN1/JAK3/TNFSF13B/HLA-DRB1/HLA-DPB1/CLEC7A/BTLA/CCR2/LEF1/ANXA1/RUNX3/GPR183/AIF1/LCK/SYK/PTPN6/TNFSF8/PRDM1/CD86/LYN/IRF4/HLA-DRA/SPN/PLA2G2D/BANK1/CD300A/IRF1/INPP5D/TNFRSF1B/M…
GOBP_REGULATION_OF_LYMPHOCYTE_DIFFERENTIATION	GOBP_REGULATION_OF_LYMPHOCYTE_DIFFERENTIATION	168	0.673788	2.37555	1e-10	9.09444e-09	7.29386e-09	1826	tags=36%, list=10%, signal=33%	IKZF3/IL7R/PTPRC/IL23A/FGL2/CD74/SLAMF8/CD2/FCRL3/RHOH/SASH3/LILRB2/HLA-DOA/JAK3/HLA-DRB1/CCR2/LEF1/ANXA1/RUNX3/SYK/PTPN6/PRDM1/CD86/IRF4/HLA-DRA/IRF1/INPP5D/ITPKB/NFKBIZ/CD83/NCKAP1L/BTK/NFATC2/TCF7/CTLA4/CD27/MALT1/ZAP70/IL7/LGALS9/IL12RB1/ZBTB1/RIPK2/ZFP36L2/IL4R/GATA3/DUSP10/FANCA/PCK1/IFNG/TNFSF18/ZC3H12A/BMP4/CD80/CD28/PTPN2/XBP1/IL2RA/SFRP1/MDK/INHBA
GOBP_REGULATION_OF_RESPONSE_TO_BIOTIC_STIMULUS	GOBP_REGULATION_OF_RESPONSE_TO_BIOTIC_STIMULUS	388	0.546956	2.08425	1e-10	9.09444e-09	7.29386e-09	2647	tags=33%, list=14%, signal=29%	FCN1/KLRK1/CCL5/GBP5/IL23A/PTPN22/CD96/MNDA/FYN/FGL2/NLRC5/SLAMF6/LY86/SLAMF8/NLRC3/FCGR2B/FCER1G/FGR/CARD16/HCK/PYHIN1/HLA-DRB1/IRAK3/CYBA/KLRD1/CLEC4A/PGC/PSMB9/SYK/PTPN6/SAMHD1/CD226/LYN/RASGRP1/AIM2/TLR8/IRF1/SH2D1A/STAT1/HLA-F/SERPINB9/IFI16/HLA-E/PSMB8/CLEC4E/TNFAIP3/HLA-B/LILRA2/LBP/BIRC3/APOBEC3G/TYROBP/HTRA1/MALT1/RPS19/TLR4/PRKCD/CARD8/ICAM3/LGALS9/ARRB2/KLRC1/IL12RB1/RELA/HAVCR2/JAK2/R…
GOBP_REGULATION_OF_T_CELL_ACTIVATION	GOBP_REGULATION_OF_T_CELL_ACTIVATION	306	0.651329	2.43568	1e-10	9.09444e-09	7.29386e-09	1913	tags=37%, list=10%, signal=33%	KLRK1/RAC2/CORO1A/IL7R/PTPRC/CCL5/IL23A/PTPN22/FYN/DOCK8/IDO1/CCR7/HLA-DMB/CD3E/FGL2/VCAM1/CD74/CD4/FCGR2B/CD2/HLA-DPA1/RHOH/SASH3/LILRB2/LAPTM5/HLA-DOA/CCL2/JAK3/TNFSF13B/HLA-DRB1/HLA-DPB1/BTLA/CCR2/LEF1/ANXA1/RUNX3/AIF1/LCK/SYK/PTPN6/TNFSF8/PRDM1/CD86/LYN/IRF4/HLA-DRA/SPN/PLA2G2D/CD300A/IRF1/TNFRSF1B/ITPKB/NFKBIZ/HLA-E/AKT1/CD83/NCKAP1L/NFATC2/GPNMB/CD5/IL1B/FGL1/CLEC4G/TCF7/SIRPG/CTLA4/SIRPB1/…
GOBP_REGULATION_OF_T_CELL_DIFFERENTIATION	GOBP_REGULATION_OF_T_CELL_DIFFERENTIATION	139	0.686448	2.37969	1e-10	9.09444e-09	7.29386e-09	1679	tags=37%, list=9%, signal=34%	IL7R/PTPRC/IL23A/FGL2/CD74/CD2/RHOH/SASH3/LILRB2/HLA-DOA/JAK3/HLA-DRB1/CCR2/LEF1/ANXA1/RUNX3/SYK/PRDM1/CD86/IRF4/HLA-DRA/IRF1/ITPKB/NFKBIZ/CD83/NCKAP1L/NFATC2/TCF7/CTLA4/CD27/MALT1/ZAP70/IL7/LGALS9/IL12RB1/ZBTB1/RIPK2/IL4R/GATA3/DUSP10/FANCA/PCK1/IFNG/TNFSF18/ZC3H12A/BMP4/CD80/CD28/PTPN2/XBP1/IL2RA
GOBP_RESPONSE_TO_INTERFERON_GAMMA	GOBP_RESPONSE_TO_INTERFERON_GAMMA	182	0.707798	2.52051	1e-10	9.09444e-09	7.29386e-09	2390	tags=53%, list=13%, signal=47%	HLA-DRB4/CCL5/GBP5/HLA-DRB5/IFITM1/NLRC5/VCAM1/CD74/HLA-DPA1/CASP1/HCK/GBP4/CD44/CCL2/HLA-DRB1/IRF8/HLA-DPB1/CCL18/GBP1/IFI30/MT2A/TRIM22/AIF1/HLA-DQA1/OAS2/IRF4/PTAFR/HLA-DRA/VIM/GSN/IRF1/MEFV/STAT1/HLA-F/CIITA/ICAM1/HLA-E/ASS1/HLA-B/GBP2/TLR2/HLA-DQB1/HLA-C/OASL/TRIM31/NCAM1/IRF9/TLR4/PRKCD/BST2/LGALS9/IL12RB1/JAK2/DAPK1/GBP7/TRIM68/RAB20/CX3CL1/CD40/HLA-A/TP53/IFNG/ZYX/TRIM8/TRIM25/CCL8/CCL20/…
GOBP_TUMOR_NECROSIS_FACTOR_SUPERFAMILY_CYTOKINE_PRODUCTION	GOBP_TUMOR_NECROSIS_FACTOR_SUPERFAMILY_CYTOKINE_PRODUCTION	139	0.695132	2.40979	1e-10	9.09444e-09	7.29386e-09	2575	tags=48%, list=14%, signal=42%	PTPRC/IL23A/PTPN22/CX3CR1/NLRC3/CD2/SASH3/IRAK3/CYBA/CLEC7A/CCR2/CLEC4A/SYK/PTPN6/CD86/ORM2/RASGRP1/PTAFR/SPN/TSPO/MYD88/ORM1/IL33/HLA-E/TNFAIP3/LILRA2/LBP/CD14/GSTP1/TLR2/UBE2J1/TYROBP/TLR4/LGALS9/ARRB2/DDT/HAVCR2/JAK2/RIPK2/CX3CL1/IFNG/SLAMF1/ZC3H12A/DICER1/STAT3/SYT11/LILRB1/NOD2/TLR1/PYCARD/CD33/CCL19/LILRA5/CLU/LY96/PF4/SIRPA/AXL/TWIST1/MAPKAPK2/ZFP36/TREM2/CCL3/APP/PTPRJ/ARHGEF2/MIF
GOBP_T_CELL_ACTIVATION	GOBP_T_CELL_ACTIVATION	444	0.659001	2.5482	1e-10	9.09444e-09	7.29386e-09	1881	tags=36%, list=10%, signal=33%	KLRK1/RAC2/CORO1A/IL7R/PTPRC/CCL5/CD8A/IL23A/CD3D/PTPN22/ITK/CD3G/FYN/LCP1/DOCK8/IDO1/CCR7/HLA-DMB/CD3E/FGL2/VCAM1/THEMIS/SLAMF6/CD74/CD4/NLRC3/ITGAL/BCL11B/PTGER4/FCGR2B/CD2/FCER1G/HLA-DPA1/RHOH/DOCK2/SASH3/LILRB2/CD44/LAPTM5/HLA-DOA/CCL2/JAK3/TNFSF13B/HLA-DRB1/HLA-DPB1/CLEC7A/BTLA/CCR2/LEF1/ANXA1/APBB1IP/RUNX3/GPR183/CLEC4A/AIF1/LCK/SYK/ELF4/PTPN6/PIK3CD/TNFSF8/PRDM1/CD86/LYN/BTN3A1/IRF4/RASGRP…
GOBP_T_CELL_ACTIVATION_INVOLVED_IN_IMMUNE_RESPONSE	GOBP_T_CELL_ACTIVATION_INVOLVED_IN_IMMUNE_RESPONSE	108	0.697722	2.34979	1e-10	9.09444e-09	7.29386e-09	1913	tags=44%, list=10%, signal=40%	IL23A/LCP1/HLA-DMB/FGL2/SLAMF6/CD74/ITGAL/PTGER4/FCGR2B/FCER1G/JAK3/HLA-DRB1/LEF1/ANXA1/APBB1IP/GPR183/CD86/IRF4/HLA-DRA/CD1C/SPN/RAB27A/NFKBIZ/ICAM1/SEMA4A/MALT1/LGALS3/LY9/LGALS9/EOMES/IL12RB1/HAVCR2/RIPK2/IL4R/GATA3/PCK1/TP53/IFNG/TNFSF18/ZC3H12A/IFNA21/CD80/CD81/STAT3/SLC11A1/LILRB1/MDK/CCL19
GOBP_T_CELL_DIFFERENTIATION	GOBP_T_CELL_DIFFERENTIATION	237	0.686834	2.51948	1e-10	9.09444e-09	7.29386e-09	1822	tags=36%, list=10%, signal=33%	IL7R/PTPRC/CD8A/IL23A/CD3D/PTPN22/ITK/CD3G/CCR7/CD3E/FGL2/THEMIS/SLAMF6/CD74/CD4/BCL11B/PTGER4/CD2/FCER1G/RHOH/DOCK2/SASH3/LILRB2/HLA-DOA/JAK3/HLA-DRB1/CCR2/LEF1/ANXA1/RUNX3/GPR183/LCK/SYK/PIK3CD/TNFSF8/PRDM1/CD86/IRF4/HLA-DRA/SPN/PLA2G2D/IRF1/BCL2/ITPKB/NFKBIZ/MAFB/CD83/NCKAP1L/NFATC2/PREX1/IL1B/SEMA4A/TCF7/CTLA4/CD27/MALT1/ZAP70/IL7/LY9/LGALS9/KLRC1/EOMES/IL12RB1/ZBTB1/RIPK2/ZFP36L2/IL4R/GATA3/…
GOBP_T_CELL_PROLIFERATION	GOBP_T_CELL_PROLIFERATION	183	0.656145	2.33564	1e-10	9.09444e-09	7.29386e-09	1726	tags=37%, list=9%, signal=34%	RAC2/CORO1A/PTPRC/CCL5/IL23A/PTPN22/FYN/DOCK8/IDO1/HLA-DMB/CD3E/VCAM1/CD4/HLA-DPA1/DOCK2/SASH3/LILRB2/JAK3/TNFSF13B/HLA-DRB1/HLA-DPB1/CCR2/ANXA1/AIF1/SYK/ELF4/PTPN6/TNFSF8/CD86/BTN3A1/RASGRP1/SPN/PLA2G2D/IRF1/TNFRSF1B/HLA-E/CCND3/NCKAP1L/MSN/GPNMB/IL1B/CLEC4G/CTLA4/MALT1/LGALS3/ZAP70/TNFSF14/LGALS9/IL12RB1/HAVCR2/PRKCQ/RIPK2/IGFBP2/HLA-A/TP53/LRRC32/CD40LG/PDCD1LG2/TNFSF18/BMP4/CD80/CD28/CD81/PIK…
GOBP_T_CELL_RECEPTOR_SIGNALING_PATHWAY	GOBP_T_CELL_RECEPTOR_SIGNALING_PATHWAY	185	0.665051	2.3666	1e-10	9.09444e-09	7.29386e-09	1646	tags=32%, list=9%, signal=30%	TRBC1/HLA-DRB4/PTPRC/TRAT1/CD3D/PTPN22/ITK/CD3G/FYN/CCR7/SKAP1/CD3E/LCP2/HLA-DRB5/THEMIS/CD4/HLA-DPA1/LAPTM5/HLA-DRB1/HLA-DPB1/GBP1/PSMB9/LCK/PTPN6/HLA-DQA1/PIK3CD/PDE4B/CD226/BTN3A1/BTN3A3/HLA-DRA/CD300A/BTN3A2/SH2D1A/INPP5D/NFKBIZ/PSMB8/HLA-DQB1/CTLA4/PAG1/CD247/MALT1/LGALS3/ZAP70/PRAM1/RELA/PRKCQ/EZR/RIPK2/GATA3/SLA2/HLA-A/ZC3H12A/CD28/NFKB1/PTPN2/PSME1/CD81/TXK/PSME2
GOBP_T_CELL_SELECTION	GOBP_T_CELL_SELECTION	47	0.82494	2.44309	1e-10	9.09444e-09	7.29386e-09	1641	tags=53%, list=9%, signal=49%	PTPRC/IL23A/CD3D/CD3G/CCR7/CD3E/THEMIS/SLAMF6/CD74/CD4/BCL11B/DOCK2/SYK/IRF4/SPN/BCL2/ITPKB/ZAP70/LY9/IL12RB1/GATA3/TNFSF18/CD28/PTPN2/STAT3
GOCC_EXTERNAL_SIDE_OF_PLASMA_MEMBRANE	GOCC_EXTERNAL_SIDE_OF_PLASMA_MEMBRANE	314	0.660309	2.47139	1e-10	9.09444e-09	7.29386e-09	1892	tags=34%, list=10%, signal=31%	FCN1/TRBC1/KLRK1/IGHA1/IL7R/PTPRC/IGHM/CD8A/CD3D/MS4A1/CD69/IL2RB/ITGB2/CXCL9/CX3CR1/CD3G/IL2RG/CLEC2D/CCR7/CXCL10/CD3E/IL13RA2/VCAM1/CD74/CD4/FCGR2B/CD2/FCER1G/CXCR6/LY75/CLEC2B/CXCL12/HLA-DRB1/FCGR3A/CCR2/ANXA1/FAS/PDGFRA/CXCR4/LIFR/ITGAM/CD226/CD86/BTN3A1/BTN3A3/CCR1/CD1C/TLR8/SPN/FCRL6/BTN3A2/HLA-F/ICAM1/GP1BA/CD1A/HLA-E/CD79A/TNFRSF9/CCR4/CD83/CCR5/CD5/CD14/CD1B/CD22/CTLA4/CD1E/FGA/CCRL2/CD2…
GOCC_RECEPTOR_COMPLEX	GOCC_RECEPTOR_COMPLEX	402	0.51106	1.95773	1e-10	9.09444e-09	7.29386e-09	2460	tags=25%, list=13%, signal=23%	TRBC1/TRAT1/CD8A/CD3D/IL2RB/ITGB2/CD3G/ITGA4/IL2RG/CSF2RB/SKAP1/CD3E/IL13RA2/CD74/CD4/ITGAL/ITGBL1/CD44/PDGFRA/KLRD1/APBB1IP/ITGB7/SYK/PTPN6/CSF1R/LIFR/ITGAM/EPHA3/LYN/TNFRSF1B/GPRC5B/GABRR3/PTK2B/FGFR2/PIGR/CD79A/GABRG3/NTRK2/CD14/TEK/TLR2/TRAF1/ITGAX/RAMP3/GABBR1/ITGA9/HTR2B/CD247/TRGV5/ZAP70/TLR4/BMPR2/ADRA2A/NOTCH2/CNIH3/CD8B/KLRC1/FLT3/IL12RB1/PTH1R/TGFBR3/IL3RA/ABCG5/CR2/TRAF3/LRP1/IL4R/FCR…
GOMF_ANTIGEN_BINDING	GOMF_ANTIGEN_BINDING	62	0.845764	2.61541	1e-10	9.09444e-09	7.29386e-09	1482	tags=58%, list=8%, signal=54%	FCN1/TRBC1/CD48/IGHA1/IL7R/IGHM/IGLV1-44/ITGA4/HLA-DRB5/HLA-DPA1/MFAP4/HLA-DRB1/HLA-DPB1/TAP1/KLRD1/HLA-DQA1/FCN3/LILRA1/HLA-DRA/CD1C/HLA-F/CD1A/HLA-E/HLA-B/LILRA2/HLA-DQB1/CD1B/HLA-C/TAPBP/CD1E/TAP2/CD40/HLA-A/CLEC4M/SLAMF1/PLG
GOMF_CYTOKINE_RECEPTOR_ACTIVITY	GOMF_CYTOKINE_RECEPTOR_ACTIVITY	93	0.751005	2.47014	1e-10	9.09444e-09	7.29386e-09	3144	tags=47%, list=17%, signal=40%	IL7R/IL2RB/CX3CR1/IL2RG/CSF2RB/CCR7/IL13RA2/CD74/CD4/IL10RA/CXCR6/CD44/CCR2/CXCR4/IL17RA/LIFR/CCR1/CCR4/CCR5/IL21R/CCRL2/FLT3/IL12RB1/IL1RAP/IL3RA/IL4R/IL2RA/IFNGR2/CSF3R/GHR/IL12RB2/IL10RB/IL1RL1/GPR75/IL18RAP/CSF2RA/IL15RA/IL18R1/GFRA1/CMKLR1/PRLR/OSMR/CXCR3/IFNAR2
GOMF_IMMUNE_RECEPTOR_ACTIVITY	GOMF_IMMUNE_RECEPTOR_ACTIVITY	126	0.775549	2.64001	1e-10	9.09444e-09	7.29386e-09	1809	tags=41%, list=10%, signal=38%	IL7R/IL2RB/CX3CR1/IL2RG/CSF2RB/CCR7/IL13RA2/CD74/CD4/FCGR2B/FCER1G/HLA-DPA1/IL10RA/CXCR6/LILRB2/CD44/HLA-DOA/HLA-DRB1/CCR2/HLA-DOB/KLRF1/KLRD1/CXCR4/HLA-DQA1/IL17RA/LIFR/CCR1/HLA-DRA/FPR1/C5AR1/PIGR/CCR4/CCR5/C3AR1/IL21R/HLA-DQB1/CCRL2/FPR3/KLRC1/FLT3/IL12RB1/IL1RAP/IL3RA/CR2/IL4R/IL2RA/IFNGR2/CSF3R/LILRB1/GHR/IL12RB2/MR1
GOBP_LYMPHOCYTE_MIGRATION	GOBP_LYMPHOCYTE_MIGRATION	103	0.694462	2.33109	1.22965e-10	1.10298e-08	8.84603e-09	2460	tags=50%, list=13%, signal=43%	KLRK1/CCL5/ITGA4/CH25H/DOCK8/CCR7/CXCL10/SAA1/ITGAL/CXCL12/CXCL14/CCL2/CCL18/CCR2/ITGB7/GPR183/AIF1/PIK3CD/JAM2/SPN/PTK2B/ICAM1/CXCL11/PADI2/AKT1/MSN/STK10/CXCL13/ZAP70/GATA3/CX3CL1/HSD3B7/LRCH1/CCL8/CCL20/CD99/CD200/PIK3CG/PYCARD/CCL19/CCL21/S1PR1/RIPK3/MYO1G/CRK/CCL25/TNFRSF14/TBX21/CCL3/CCL23/APP
GOBP_NEGATIVE_REGULATION_OF_INFLAMMATORY_RESPONSE	GOBP_NEGATIVE_REGULATION_OF_INFLAMMATORY_RESPONSE	113	0.67706	2.29663	1.25633e-10	1.11169e-08	8.91586e-09	2176	tags=40%, list=11%, signal=35%	PTPRC/C1QTNF3/SAA1/SLAMF8/NLRC3/PTGER4/FCGR2B/HLA-DRB1/AOAH/HGF/HAMP/MEFV/TNFRSF1B/APOA1/KLF4/PTGIS/TNFAIP3/ALOX5/TEK/GSTP1/APCS/RPS19/PRKCD/NLRP12/GATA3/CX3CL1/DUSP10/CST7/NFKB1/CD200/PTPN2/APOE/FNDC4/GRN/IL2RA/SOCS3/SYT11/NOD2/GPX1/MDK/MFHAS1/NR1H3/PPARA/RB1/SIRPA
GOBP_REGULATION_OF_LEUKOCYTE_MEDIATED_CYTOTOXICITY	GOBP_REGULATION_OF_LEUKOCYTE_MEDIATED_CYTOTOXICITY	76	0.73582	2.3583	1.6715e-10	1.45933e-08	1.1704e-08	2224	tags=51%, list=12%, signal=45%	KLRK1/IL7R/PTPRC/IL23A/SLAMF6/FCGR2B/DNASE1L3/HLA-DRB1/KLRD1/ITGAM/CD226/RASGRP1/HLA-DRA/CD1C/SH2D1A/HLA-F/SERPINB9/ICAM1/CD1A/HLA-E/HLA-B/CD1B/CD1E/TYROBP/LGALS9/ARRB2/KLRC1/IL12RB1/HAVCR2/NCR3/HLA-A/STAP1/LILRB1/MR1/VAV1/HLA-H/B2M/RIPK3/CRK
GOBP_NEGATIVE_REGULATION_OF_LYMPHOCYTE_ACTIVATION	GOBP_NEGATIVE_REGULATION_OF_LYMPHOCYTE_ACTIVATION	142	0.642251	2.22358	1.76418e-10	1.50449e-08	1.20662e-08	1865	tags=38%, list=10%, signal=35%	PTPN22/MNDA/IDO1/FGL2/CD74/FCGR2B/FGR/LILRB2/LST1/LAPTM5/SAMSN1/JAK3/HLA-DRB1/ANXA1/RUNX3/PTPN6/CD86/LYN/SPN/PLA2G2D/BANK1/CD300A/IRF1/INPP5D/HLA-F/TNFAIP3/BTK/GPNMB/FGL1/ATM/CLEC4G/CTLA4/TYROBP/PAG1/LGALS3/LGALS9/HAVCR2/IL4R/LRRC32/PDCD1LG2/TNFSF18/ZC3H12A/BMP4/CD80/PTPN2/LAX1/IL2RA/SFRP1/LILRB1/PRNP/TNFRSF13B/MDK/INHBA/TBC1D10C
GOBP_POSITIVE_REGULATION_OF_CELL_KILLING	GOBP_POSITIVE_REGULATION_OF_CELL_KILLING	60	0.773706	2.37384	1.77144e-10	1.50449e-08	1.20662e-08	2004	tags=53%, list=11%, signal=48%	KLRK1/PTPRC/IL23A/PRF1/SLAMF6/HLA-DRB1/CLEC7A/KLRD1/SYK/ITGAM/CD226/RASGRP1/HLA-DRA/CD1C/SH2D1A/CD5L/HLA-F/CD1A/HLA-E/HLA-B/CD1B/CD1E/TYROBP/IL12RB1/NCR3/HLA-A/IFNG/STAP1/MR1/VAV1/HLA-H/B2M
GOBP_REGULATION_OF_B_CELL_PROLIFERATION	GOBP_REGULATION_OF_B_CELL_PROLIFERATION	60	0.773686	2.37377	1.79216e-10	1.50449e-08	1.20662e-08	1291	tags=45%, list=7%, signal=42%	IKZF3/PTPRC/MNDA/CD38/BST1/CD74/FCGR2B/FCRL3/SASH3/TNFSF13B/GPR183/LYN/CD300A/INPP5D/BCL2/NCKAP1L/BTK/NFATC2/ATM/MEF2C/CD22/CTLA4/TYROBP/TLR4/IL7/VAV3/CD40
GOBP_NEGATIVE_REGULATION_OF_RESPONSE_TO_EXTERNAL_STIMULUS	GOBP_NEGATIVE_REGULATION_OF_RESPONSE_TO_EXTERNAL_STIMULUS	330	0.520368	1.95992	1.96207e-10	1.62628e-08	1.3043e-08	2871	tags=35%, list=15%, signal=30%	KLRK1/PTPRC/CD96/C1QTNF3/SAA1/FGL2/NLRC5/SLAMF8/NLRC3/PTGER4/FCGR2B/CARD16/CCL2/HLA-DRB1/IRAK3/PDGFRA/KLRD1/AOAH/AIF1/SAMHD1/HGF/HAMP/MEFV/TNFRSF1B/APOA1/HLA-F/SERPINB9/GP1BA/IFI16/KLF4/SEMA4D/HLA-E/PADI2/PTGIS/TNFAIP3/HLA-B/LILRA2/ALOX5/SEMA4A/TEK/GSTP1/SERPINF2/CXCL13/FGA/HTRA1/VTN/APCS/RPS19/PRKCD/NLRP12/CARD8/PLAT/LGALS9/ARRB2/KLRC1/DDT/CTNNA2/HAVCR2/CORO1B/PLAUR/GATA3/CX3CL1/DUSP10/FGG/HLA-A…
GOBP_REGULATION_OF_LYMPHOCYTE_MEDIATED_IMMUNITY	GOBP_REGULATION_OF_LYMPHOCYTE_MEDIATED_IMMUNITY	145	0.63514	2.20834	2.00502e-10	1.64111e-08	1.31619e-08	2783	tags=45%, list=15%, signal=39%	KLRK1/IL7R/PTPRC/IL23A/CD96/SLAMF6/FCGR2B/SASH3/HLA-DRB1/CCR2/KLRD1/PTPN6/CD226/RASGRP1/HLA-DRA/CD1C/SH2D1A/TNFRSF1B/HLA-F/SERPINB9/CD1A/HLA-E/HLA-B/BTK/IL1B/CD1B/CLEC4G/CD1E/MALT1/LGALS9/ARRB2/KLRC1/IL12RB1/ZBTB1/HAVCR2/NCR3/SH2D1B/GATA3/CD40/HLA-A/CD28/CD81/HPX/LILRB1/NOD2/C4BPA/MR1/VAV1/HLA-H/B2M/RIPK3/CRK/CR1/TBX21/IL18RAP/CRTAM/C3/ARG1/LILRB4/IL18R1/WAS/AZGP1/EXOSC6/TNF/KIR2DL4
GOBP_POSITIVE_REGULATION_OF_LEUKOCYTE_PROLIFERATION	GOBP_POSITIVE_REGULATION_OF_LEUKOCYTE_PROLIFERATION	143	0.634837	2.20499	2.27082e-10	1.83572e-08	1.47227e-08	1679	tags=37%, list=9%, signal=34%	CORO1A/PTPRC/CCL5/IL23A/PTPN22/CD38/BST1/HLA-DMB/CD3E/VCAM1/CD74/CD4/HLA-DPA1/FCRL3/SASH3/LILRB2/JAK3/TNFSF13B/HLA-DPB1/CCR2/ANXA1/GPR183/AIF1/SYK/CSF1R/CD86/LYN/MYD88/BCL2/HLA-E/NCKAP1L/NFATC2/IL1B/MEF2C/ZAP70/TLR4/IL7/BST2/LGALS9/VAV3/IL12RB1/HAVCR2/PRKCQ/RIPK2/IGFBP2/CD40/HLA-A/CD40LG/PDCD1LG2/CD80/CD28/CD81/IL2RA
GOBP_NATURAL_KILLER_CELL_MEDIATED_IMMUNITY	GOBP_NATURAL_KILLER_CELL_MEDIATED_IMMUNITY	63	0.774853	2.4052	2.3643e-10	1.88798e-08	1.51418e-08	1324	tags=40%, list=7%, signal=37%	KLRK1/CORO1A/CD96/GZMB/SLAMF7/SLAMF6/KLRD1/PTPN6/CD226/RASGRP1/RNF19B/SH2D1A/RAB27A/HLA-F/SERPINB9/HLA-E/HLA-B/LGALS9/ARRB2/KLRC1/HAVCR2/NCR3/SH2D1B/LYST/HLA-A
GOBP_ALPHA_BETA_T_CELL_DIFFERENTIATION	GOBP_ALPHA_BETA_T_CELL_DIFFERENTIATION	106	0.67982	2.29096	2.53388e-10	1.99901e-08	1.60324e-08	1641	tags=39%, list=9%, signal=36%	IL23A/ITK/SLAMF6/BCL11B/PTGER4/SASH3/JAK3/HLA-DRB1/LEF1/ANXA1/RUNX3/GPR183/SYK/TNFSF8/PRDM1/CD86/IRF4/HLA-DRA/SPN/PLA2G2D/IRF1/BCL2/ITPKB/NFKBIZ/CD83/NCKAP1L/SEMA4A/MALT1/ZAP70/LY9/LGALS9/EOMES/IL12RB1/RIPK2/IL4R/GATA3/IFNG/TNFSF18/ZC3H12A/CD80/STAT3
GOBP_I_KAPPAB_KINASE_NF_KAPPAB_SIGNALING	GOBP_I_KAPPAB_KINASE_NF_KAPPAB_SIGNALING	261	0.550771	2.03596	2.56643e-10	2.0006e-08	1.6045e-08	2199	tags=34%, list=12%, signal=31%	PRKCB/CX3CR1/FYN/S100A12/CCR7/S100A4/CD74/CD4/NLRC3/CASP1/CARD16/RHOH/APOL3/HLA-DRB1/TRIM22/TNFSF10/TLR8/GPRC5B/MYD88/STAT1/FLNA/AKT1/ESR1/TNFAIP3/BTK/TIFA/BIRC3/IL1B/NFKBIA/CD14/GSTP1/TLR2/TRAF1/MAP3K3/CAPN3/HMOX1/CASP8/HTR2B/MALT1/TLR4/NLRP12/SLC44A2/CFLAR/CARD8/LITAF/BST2/LGALS9/RELA/SECTM1/RIPK2/PIM2/PELI2/TRIM68/S100B/TRAF3/TRIM59/IRAK4/CX3CL1/CD40/CASP10/LPAR1/REL/TRIM8/TRIM25/ZC3H12A/LGALS…
GOBP_POSITIVE_REGULATION_OF_HEMOPOIESIS	GOBP_POSITIVE_REGULATION_OF_HEMOPOIESIS	147	0.631939	2.2071	2.71539e-10	2.09181e-08	1.67766e-08	2998	tags=46%, list=16%, signal=39%	IL7R/PTPRC/EVI2B/IL23A/CD74/CD4/RHOH/SASH3/LILRB2/HLA-DRB1/LEF1/ANXA1/HCLS1/RUNX3/SYK/CD86/CCR1/HLA-DRA/INPP5D/ITPKB/NFKBIZ/CD83/FOS/NCKAP1L/BTK/CD27/TYROBP/CASP8/MALT1/ZAP70/NOTCH2/IL7/LGALS9/IL12RB1/ZBTB1/RIPK2/IL4R/GATA3/DUSP10/PCK1/IFNG/GPR68/CD80/GNAS/XBP1/IL2RA/ATP6AP1/MDK/CCL19/RB1/PF4/AXL/CR1/IL15/TREM2/ACIN1/JUN/ADA/LILRB4/TNF/EGR3/TGFB1/PNP/ZFP36L1/AGER/ZBTB46/NFKBID
GOBP_REGULATION_OF_HUMORAL_IMMUNE_RESPONSE	GOBP_REGULATION_OF_HUMORAL_IMMUNE_RESPONSE	74	0.738875	2.35875	3.13268e-10	2.38521e-08	1.91297e-08	2565	tags=50%, list=13%, signal=43%	PTPRC/IGLV1-44/C7/CCR7/FCGR2B/CFP/PGC/PTPN6/C9/C1QB/C1QC/CD5L/C1QA/C5AR1/C3AR1/C8B/IL1B/C8A/CXCL13/VTN/C1R/CR2/CFI/C2/CFB/C6/CD81/HPX/NOD2/C4BPA/IGKC/C1S/CLU/CR1/SERPING1/VSIG4/C3
GOBP_B_CELL_MEDIATED_IMMUNITY	GOBP_B_CELL_MEDIATED_IMMUNITY	116	0.66985	2.26851	3.28857e-10	2.47512e-08	1.98508e-08	2055	tags=42%, list=11%, signal=38%	TRBC1/IGHA1/PTPRC/IGHM/IGLV1-44/C7/IL13RA2/CD74/FCGR2B/FCER1G/CRP/HLA-DRB1/GAPT/PTPN6/CD226/C9/C1QB/TLR8/C1QC/INPP5D/MYD88/C1QA/HLA-E/C8B/BTK/HLA-DQB1/C8A/CD27/APCS/PRKCD/C1R/CR2/RNF168/CFI/IL4R/CD40/SLA2/C2/CD40LG/C6/CD28/CD81/HPX/C1RL/NOD2/C4BPA/IGKC/C1S/CLU
GOBP_MONONUCLEAR_CELL_MIGRATION	GOBP_MONONUCLEAR_CELL_MIGRATION	170	0.602732	2.12826	3.64581e-10	2.71281e-08	2.17571e-08	2494	tags=45%, list=13%, signal=39%	KLRK1/CCL5/S100A12/ITGA4/CH25H/DOCK8/CCR7/CXCL10/SAA1/SLAMF8/ITGAL/CXCL12/CXCL14/CCL2/CCL18/CCR2/ANXA1/ITGB7/GPR183/AIF1/CXCR4/PIK3CD/CSF1R/JAM2/LYN/CCR1/SPN/BMP5/PTK2B/ICAM1/C5AR1/CXCL11/PADI2/AKT1/CCR5/C3AR1/PLA2G7/ALOX5/PECAM1/MSN/STK10/CXCL13/RPS19/LGALS3/ZAP70/CALR/LGALS9/LGMN/GATA3/CREB3/CX3CL1/HSD3B7/LRCH1/CCL8/CCL20/TNFSF18/CD99/CD200/PIK3CG/DUSP1/PYCARD/MDK/CCL19/CCL21/S1PR1/RIPK3/SIRPA/…
GOBP_NEUTROPHIL_MIGRATION	GOBP_NEUTROPHIL_MIGRATION	110	0.67414	2.28121	3.91086e-10	2.85676e-08	2.29116e-08	1982	tags=46%, list=10%, signal=42%	RAC2/S100A8/CCL5/IL23A/ITGB2/CXCL9/S100A12/BST1/CCR7/CXCL10/SAA1/CD74/SLAMF8/FCER1G/RHOH/CCL2/CCL18/SYK/PIK3CD/PDE4B/MYD88/MCOLN2/C5AR1/CXCL11/CXCL2/C3AR1/NCKAP1L/LBP/PECAM1/PREX1/RHOG/CXCL13/WDR1/LGALS3/MPP1/VAV3/IRAK4/CX3CL1/CCL8/CCL20/CD99/PIK3CG/PPBP/CSF3R/NOD2/MDK/VAV1/CCL19/PPIB/S100A9/CCL21
GOCC_BLOOD_MICROPARTICLE	GOCC_BLOOD_MICROPARTICLE	106	0.675577	2.27667	3.92652e-10	2.85676e-08	2.29116e-08	2055	tags=46%, list=11%, signal=41%	IGHA1/IGHM/HSPA6/PZP/F13A1/FCN3/C9/ORM2/C1QB/HBB/C1QC/A1BG/GSN/CD5L/ORM1/APOA1/AFM/MSN/CLIC1/C8A/SERPINF2/FGA/VTN/PFN1/APCS/C1R/SERPINA3/HP/ITIH4/FGG/ITIH1/CFB/PLG/FGB/ENG/HPR/APOE/ALB/HPX/C1RL/STOM/APOL1/C4BPA/CP/IGKC/AMBP/HRG/C1S/CLU
GOBP_POSITIVE_REGULATION_OF_ERK1_AND_ERK2_CASCADE	GOBP_POSITIVE_REGULATION_OF_ERK1_AND_ERK2_CASCADE	180	0.597173	2.12218	4.77703e-10	3.43736e-08	2.75681e-08	2460	tags=39%, list=13%, signal=35%	PTPRC/CCL5/PTPN22/CCR7/CD74/CD4/CD44/CCL2/HLA-DRB1/CCL18/PDGFRA/GPR183/MARCO/CSF1R/GLIPR2/CCR1/RASGRP1/PTK2B/FGFR2/ICAM1/C5AR1/GNAI2/GPNMB/TEK/SERPINF2/PLA2G2A/RAPGEF1/RAMP3/IL26/FGA/HTR2B/TLR4/NOTCH2/CFLAR/LGALS9/ARRB2/DDT/HAVCR2/RIPK2/CIB1/LRP1/CX3CL1/FGG/SLAMF1/HAND2/CCL8/CCL20/BMPER/FGB/BMP4/APOE/ATP6AP1/NOD2/ADRA1A/PYCARD/MFHAS1/SRC/F2R/CCL19/ARRB1/CCL21/KDR/FERMT2/CCL25/RAP1B/GPBAR1/TREM2/C…
GOBP_POSITIVE_REGULATION_OF_DEFENSE_RESPONSE	GOBP_POSITIVE_REGULATION_OF_DEFENSE_RESPONSE	334	0.504852	1.90229	6.28869e-10	4.4759e-08	3.58973e-08	2783	tags=37%, list=15%, signal=32%	FCN1/KLRK1/S100A8/CCL5/GBP5/IL23A/MNDA/FYN/S100A12/IDO1/CCR7/NLRC5/SLAMF6/PTGER4/FCER1G/HCK/PYHIN1/CYBA/CCR2/ETS1/KLRD1/CLEC4A/PGC/PSMB9/SYK/CD226/LYN/RASGRP1/AIM2/TLR8/FABP4/SH2D1A/GPRC5B/HLA-F/IL33/NFKBIZ/IFI16/HLA-E/PSMB8/CLEC4E/IL16/PLA2G7/LILRA2/LBP/BTK/IL1B/NFKBIA/TLR2/MEF2C/PLA2G2A/TYROBP/MALT1/RPS19/TLR4/PRKCD/NLRP12/ICAM3/DDT/RELA/HAVCR2/JAK2/RIPK2/CREB3L3/NCR3/LRRK2/SH2D1B/CX3CL1/PRKACB…
GOBP_INTERLEUKIN_1_PRODUCTION	GOBP_INTERLEUKIN_1_PRODUCTION	103	0.682893	2.29225	6.8747e-10	4.84038e-08	3.88205e-08	1925	tags=45%, list=10%, signal=40%	GBP5/CX3CR1/MNDA/CCR7/SAA1/CASP1/CARD16/PYHIN1/CLEC7A/ANXA1/HK1/ORM2/AIM2/TLR8/MEFV/ORM1/APOA1/IFI16/TNFAIP3/IL16/LILRA2/GSTP1/NLRP1/TYROBP/CASP8/MALT1/TLR4/NLRP12/CARD8/LGALS9/ARRB2/HAVCR2/JAK2/RIPK2/CX3CL1/IFNG/P2RX7/SERPINB1/ZC3H12A/STAT3/NOD2/PYCARD/CD33/F2R/CCL19/LILRA5
GOBP_INTERLEUKIN_2_PRODUCTION	GOBP_INTERLEUKIN_2_PRODUCTION	60	0.759608	2.33058	1.00089e-09	6.97218e-08	5.59178e-08	3024	tags=60%, list=16%, signal=51%	PTPRC/CD3E/CD4/SASH3/LAPTM5/CLEC7A/CCR2/ANXA1/GBP1/PDE4B/CD86/IRF4/CD83/TNFAIP3/IL1B/NAV3/MALT1/HAVCR2/PRKCQ/EZR/RIPK2/GATA3/CD80/CD28/PRNP/NOD2/HDAC7/PDE4D/CR1/ZFP36/TBX21/VSIG4/LILRB4/PNP/RPS3/LAG3
GOBP_MYELOID_CELL_DIFFERENTIATION	GOBP_MYELOID_CELL_DIFFERENTIATION	350	0.494753	1.87338	1.03596e-09	7.1405e-08	5.72677e-08	3200	tags=35%, list=17%, signal=30%	EVI2B/IL23A/PRKCB/GPR171/IKZF1/CCR7/MMP9/RASSF2/CD74/CD4/MT1G/JAK3/HLA-DRB1/IRF8/FLI1/LEF1/ETS1/HCLS1/GPR183/PTPN6/PIK3CD/CSF1R/PIP4K2A/LYN/IRF4/CCR1/KLF2/C1QC/INPP5D/STAT1/PTK2B/ITPKB/GP1BA/IFI16/MAFB/SPI1/FOS/ISG15/NCKAP1L/GAB3/NFKBIA/TLR2/MEF2C/WDR1/TYROBP/CASP8/APCS/RPS19/LGALS3/TLR4/NOTCH2/WASF2/TGFBR3/JAK2/PRKCQ/LDB1/JUNB/KLF13/CIB1/GATA3/IFNG/RASGRP4/PRKX/GPR68/BMP4/EPAS1/PTPN2/CD81/STAT3/…
GOBP_ERK1_AND_ERK2_CASCADE	GOBP_ERK1_AND_ERK2_CASCADE	278	0.526194	1.94761	1.26938e-09	8.65826e-08	6.94403e-08	2460	tags=33%, list=13%, signal=30%	PTPRC/CCL5/PTPN22/CCR7/CD74/CD4/PTGER4/CD44/CCL2/HLA-DRB1/CCL18/GBP1/PDGFRA/GPR183/SYK/PTPN6/MARCO/CSF1R/GLIPR2/LYN/CCR1/RASGRP1/TIAM1/PTK2B/FGFR2/ICAM1/KLF4/C5AR1/GNAI2/GPNMB/IL1B/TEK/GSTP1/SERPINF2/PLA2G2A/RAPGEF1/RAMP3/IL26/FGA/HTR2B/TLR4/NDRG2/NOTCH2/CFLAR/LGALS9/ARRB2/DDT/RRAS/HAVCR2/EZR/RIPK2/ZFP36L2/CIB1/LRP1/CX3CL1/DUSP10/FGG/SLAMF1/HAND2/CCL8/CCL20/BMPER/FGB/BMP4/TIMP3/PTPN2/APOE/DUSP1/A…
GOBP_REGULATION_OF_ALPHA_BETA_T_CELL_ACTIVATION	GOBP_REGULATION_OF_ALPHA_BETA_T_CELL_ACTIVATION	96	0.692768	2.29416	1.34465e-09	9.07711e-08	7.27995e-08	1708	tags=40%, list=9%, signal=36%	PTPRC/IL23A/PTPN22/CD3E/SASH3/JAK3/HLA-DRB1/CCR2/ANXA1/RUNX3/SYK/PRDM1/CD86/IRF4/HLA-DRA/CD300A/IRF1/ITPKB/NFKBIZ/HLA-E/CD83/NCKAP1L/MALT1/ZAP70/LGALS9/IL12RB1/PRKCQ/RIPK2/IL4R/GATA3/HLA-A/IFNG/TNFSF18/ZC3H12A/CD80/CD28/CD81/LILRB1
GOBP_CALCIUM_MEDIATED_SIGNALING	GOBP_CALCIUM_MEDIATED_SIGNALING	179	0.593943	2.10873	1.41482e-09	9.35805e-08	7.50528e-08	2524	tags=34%, list=13%, signal=29%	PTPRC/TRAT1/CX3CR1/TMEM100/PLEK/BST1/CCR7/CD3E/VCAM1/CD4/AVPR1A/CXCR6/CCR2/GBP1/CXCR4/SYK/PTGFR/CCR1/PPP3CC/DEFB1/PTK2B/CCR4/CCR5/PPP1R9B/RCAN3/BTK/NFATC2/SLC8A1/CD22/CCRL2/CLIC2/HTR2B/ZAP70/ITPR1/ATP2B4/CIB1/LRRK2/SELP/SLA2/P2RX7/PLN/CCL20/RCAN2/DYRK2/PRNP/ANK2/TBC1D10C/ATP1A2/MCTP2/KDR/CALM1/CAMK2D/CALM3/TREM2/CCL3/P2RY12/NFATC3/PTPRJ/RGN/ADA
GOBP_REGULATION_OF_ANTIGEN_RECEPTOR_MEDIATED_SIGNALING_PATHWAY	GOBP_REGULATION_OF_ANTIGEN_RECEPTOR_MEDIATED_SIGNALING_PATHWAY	57	0.766944	2.35119	1.42353e-09	9.35805e-08	7.50528e-08	1726	tags=51%, list=9%, signal=46%	PTPRC/TRAT1/PTPN22/PRKCB/CCR7/PRKCH/FCGR2B/FCRL3/LAPTM5/LPXN/GBP1/LCK/PTPN6/CD226/LYN/CD300A/SH2D1A/PLCL2/ELF1/CD22/MALT1/LGALS3/RELA/EZR/SLA2/STAP1/PTPN2/CD81/PRNP
GOBP_DIVALENT_INORGANIC_CATION_HOMEOSTASIS	GOBP_DIVALENT_INORGANIC_CATION_HOMEOSTASIS	464	0.466399	1.80873	1.42915e-09	9.35805e-08	7.50528e-08	2391	tags=24%, list=13%, signal=22%	CORO1A/S100A8/PTPRC/CCL5/MS4A1/PRKCB/CXCL9/CX3CR1/FYN/GPR65/CD38/GPR174/CCR7/CXCL10/SAA1/MT1X/PTGER2/CD4/PTGER4/AVPR1A/MT1G/CXCR6/CXCL12/ATP2A3/CCR2/P2RY8/PDGFRA/MT2A/CXCR4/LCK/PTPN6/PTGFR/LPAR6/LYN/CCR1/TMC8/MT1F/MCOLN2/BCL2/CYSLTR1/PTK2B/MT1M/FPR1/C5AR1/CXCL11/CCR4/GPR18/RASA3/ESR1/P2RY10/CCR5/C3AR1/MT1H/SLC8A1/CAPN3/CXCL13/SLC24A4/RAMP3/SLC39A14/CCRL2/APLNR/FPR3/CLIC2/HTR2B/TRPV2/CALR/ITPR1/PT…
GOBP_HUMORAL_IMMUNE_RESPONSE_MEDIATED_BY_CIRCULATING_IMMUNOGLOBULIN	GOBP_HUMORAL_IMMUNE_RESPONSE_MEDIATED_BY_CIRCULATING_IMMUNOGLOBULIN	55	0.779246	2.37873	1.61214e-09	1.04518e-07	8.38245e-08	2055	tags=56%, list=11%, signal=50%	TRBC1/IGHA1/PTPRC/IGHM/IGLV1-44/C7/FCGR2B/CRP/HLA-DRB1/PTPN6/C9/C1QB/C1QC/C1QA/C8B/HLA-DQB1/C8A/APCS/C1R/CR2/CFI/C2/C6/CD81/HPX/C1RL/NOD2/C4BPA/IGKC/C1S/CLU
GOBP_CELLULAR_DEFENSE_RESPONSE	GOBP_CELLULAR_DEFENSE_RESPONSE	49	0.798043	2.39268	1.69443e-09	1.08776e-07	8.72397e-08	1128	tags=45%, list=6%, signal=42%	TRAT1/GNLY/ITK/PRF1/CXCL9/CX3CR1/MNDA/LSP1/LILRB2/CCR2/KLRG1/SPN/SH2D1A/CD5L/NCF2/PTK2B/IL33/C5AR1/CCR5/LBP/TYROBP/RELA
GOBP_POSITIVE_REGULATION_OF_T_CELL_PROLIFERATION	GOBP_POSITIVE_REGULATION_OF_T_CELL_PROLIFERATION	96	0.689465	2.28322	1.92581e-09	1.22429e-07	9.81896e-08	1679	tags=39%, list=9%, signal=35%	CORO1A/PTPRC/CCL5/IL23A/PTPN22/HLA-DMB/CD3E/VCAM1/CD4/HLA-DPA1/SASH3/LILRB2/JAK3/TNFSF13B/HLA-DPB1/CCR2/ANXA1/AIF1/SYK/CD86/HLA-E/NCKAP1L/IL1B/ZAP70/LGALS9/IL12RB1/HAVCR2/PRKCQ/RIPK2/IGFBP2/HLA-A/CD40LG/PDCD1LG2/CD80/CD28/CD81/IL2RA
GOBP_NEGATIVE_REGULATION_OF_TUMOR_NECROSIS_FACTOR_SUPERFAMILY_CYTOKINE_PRODUCTION	GOBP_NEGATIVE_REGULATION_OF_TUMOR_NECROSIS_FACTOR_SUPERFAMILY_CYTOKINE_PRODUCTION	51	0.779518	2.34889	2.05745e-09	1.2954e-07	1.03893e-07	2373	tags=51%, list=12%, signal=45%	PTPN22/NLRC3/IRAK3/CLEC4A/PTPN6/TSPO/ORM1/TNFAIP3/LBP/GSTP1/TLR4/LGALS9/ARRB2/HAVCR2/CX3CL1/SLAMF1/ZC3H12A/DICER1/SYT11/LILRB1/NOD2/CD33/SIRPA/AXL/TWIST1/TREM2
GOBP_MACROPHAGE_ACTIVATION	GOBP_MACROPHAGE_ACTIVATION	93	0.682166	2.24372	2.09616e-09	1.3072e-07	1.04839e-07	2779	tags=49%, list=15%, signal=42%	PTPRC/ITGB2/CD74/FCGR2B/AIF1/SYK/ITGAM/HAMP/TLR8/IL33/C1QA/C5AR1/LBP/ATM/TLR2/TYROBP/TLR4/HAVCR2/JAK2/LRRK2/IL4R/CX3CL1/IFNG/STAP1/ZC3H12A/CST7/CD200/CRTC3/TLR7/SUCNR1/GRN/SLC11A1/SYT11/TLR1/MFHAS1/NR1H3/CLU/PLA2G10/IL1RL1/TREM2/CCL3/APP/VSIG4/MIF/CEBPA/TNF
GOBP_INTERLEUKIN_1_BETA_PRODUCTION	GOBP_INTERLEUKIN_1_BETA_PRODUCTION	88	0.692131	2.25545	2.90268e-09	1.79309e-07	1.43808e-07	1925	tags=48%, list=10%, signal=43%	GBP5/CX3CR1/MNDA/CCR7/CASP1/CARD16/PYHIN1/CLEC7A/HK1/ORM2/AIM2/TLR8/MEFV/ORM1/APOA1/IFI16/TNFAIP3/LILRA2/GSTP1/NLRP1/TYROBP/CASP8/MALT1/TLR4/NLRP12/CARD8/LGALS9/ARRB2/JAK2/RIPK2/CX3CL1/IFNG/P2RX7/SERPINB1/ZC3H12A/STAT3/NOD2/PYCARD/CD33/F2R/CCL19/LILRA5
GOBP_B_CELL_DIFFERENTIATION	GOBP_B_CELL_DIFFERENTIATION	133	0.63417	2.17918	3.33666e-09	2.04191e-07	1.63764e-07	2550	tags=39%, list=13%, signal=34%	IKZF3/PTPRC/MS4A1/ITM2A/ITGA4/POU2AF1/VCAM1/DOCK11/SLAMF8/FCGR2B/FCRL3/JAK3/DOCK10/GPR183/SYK/PTPN6/INPP5D/BCL2/PTK2B/CD79A/PLCL2/NCKAP1L/BTK/BLNK/ATM/CD27/ST3GAL1/MALT1/NOTCH2/MFNG/IL7/FLT3/ZBTB1/CR2/ZFP36L2/TP53/CD40LG/IFNA21/LGALS1/PTPN2/XBP1/SFRP1/INHBA/ONECUT1/CR1/CDH17/NFAM1/CMTM7/KIT/PTPRJ/ADA/TCIRG1
GOBP_POSITIVE_T_CELL_SELECTION	GOBP_POSITIVE_T_CELL_SELECTION	35	0.836259	2.30241	3.69561e-09	2.24063e-07	1.79702e-07	1641	tags=57%, list=9%, signal=52%	PTPRC/IL23A/CD3D/CD3G/CD3E/THEMIS/SLAMF6/CD74/BCL11B/DOCK2/IRF4/SPN/BCL2/ITPKB/ZAP70/LY9/IL12RB1/TNFSF18/PTPN2/STAT3
GOBP_CELLULAR_RESPONSE_TO_BIOTIC_STIMULUS	GOBP_CELLULAR_RESPONSE_TO_BIOTIC_STIMULUS	202	0.563948	2.04251	4.41127e-09	2.65e-07	2.12533e-07	2402	tags=39%, list=13%, signal=34%	CCL5/PTPN22/IL24/CXCL9/CX3CR1/CXCL10/LY86/FCGR2B/CASP1/CARD16/HCK/LILRB2/CCL2/IRF8/CLEC7A/CD68/SYK/PDE4B/CD86/LYN/HAMP/PTAFR/VIM/TSPO/TNFRSF1B/MYD88/PLSCR4/ICAM1/TXNIP/CXCL11/AKT1/CCR5/CXCL2/TNFAIP3/ASS1/LILRA2/LBP/BTK/IL1B/NFKBIA/CD14/GSTP1/TLR2/MEF2C/CXCL13/MALT1/TLR4/CARD8/LITAF/RELA/HAVCR2/RIPK2/CX3CL1/CD40/TP53/STAP1/SIRT2/PDCD1LG2/ZC3H12A/CD80/NFKB1/XBP1/PPBP/LILRB1/NOD2/TLR1/PYCARD/SRC/LDO…
GOBP_POSITIVE_REGULATION_OF_INTERFERON_GAMMA_PRODUCTION	GOBP_POSITIVE_REGULATION_OF_INTERFERON_GAMMA_PRODUCTION	63	0.751866	2.33385	4.59622e-09	2.73601e-07	2.19431e-07	1801	tags=46%, list=9%, signal=42%	IL23A/PTPN22/CD3E/SLAMF6/CD2/HLA-DPA1/SASH3/IRF8/HLA-DPB1/CLEC7A/CCR2/PDE4B/CD226/RASGRP1/TLR8/IL1B/CD14/CD244/TLR4/LGALS9/IL12RB1/HAVCR2/RIPK2/HLA-A/TLR7/TXK/SLC11A1/IL12RB2/PYCARD
GOBP_HOMEOSTASIS_OF_NUMBER_OF_CELLS	GOBP_HOMEOSTASIS_OF_NUMBER_OF_CELLS	231	0.542949	1.98505	4.84038e-09	2.85539e-07	2.29006e-07	2569	tags=35%, list=14%, signal=30%	CORO1A/IL7R/GPR174/IKZF1/CCR7/RASSF2/DOCK11/CD74/SASH3/JAK3/TNFSF13B/ANXA1/ETS1/HCLS1/FAS/DOCK10/GPR183/GAPT/PIK3CD/PDE4B/LYN/HAMP/KLF2/INPP5D/STAT1/BCL2/ITPKB/AKT1/MAFB/CCR4/TNFAIP3/SPI1/ISG15/NCKAP1L/MEF2C/AKT3/PLA2G2A/HMOX1/TNFRSF17/RPS19/FOXA3/TNFSF14/IL7/LGALS9/FLT3/SIT1/TGFBR3/JAK2/LDB1/TSC22D3/KLF13/GATA3/ARMCX1/BMP4/EPAS1/PTPN2/PMAIP1/STAT3/MYCT1/IL2RA/TNFRSF13B/INHBA/MFHAS1/F2R/ARID4A/GL…
GOBP_CELLULAR_RESPONSE_TO_MOLECULE_OF_BACTERIAL_ORIGIN	GOBP_CELLULAR_RESPONSE_TO_MOLECULE_OF_BACTERIAL_ORIGIN	181	0.580376	2.06244	5.00704e-09	2.92733e-07	2.34775e-07	2402	tags=40%, list=13%, signal=36%	CCL5/PTPN22/IL24/CXCL9/CX3CR1/CXCL10/LY86/FCGR2B/CASP1/CARD16/HCK/LILRB2/CCL2/IRF8/CD68/PDE4B/CD86/LYN/HAMP/PTAFR/VIM/TSPO/TNFRSF1B/MYD88/PLSCR4/ICAM1/CXCL11/AKT1/CCR5/CXCL2/TNFAIP3/ASS1/LILRA2/LBP/IL1B/NFKBIA/CD14/GSTP1/TLR2/MEF2C/CXCL13/MALT1/TLR4/CARD8/LITAF/RELA/HAVCR2/RIPK2/CX3CL1/CD40/STAP1/SIRT2/PDCD1LG2/ZC3H12A/CD80/NFKB1/XBP1/PPBP/LILRB1/NOD2/TLR1/PYCARD/SRC/LDOC1/NR1H3/LY96/PF4/SIRPA/AX…
GOBP_NEGATIVE_REGULATION_OF_LEUKOCYTE_MEDIATED_IMMUNITY	GOBP_NEGATIVE_REGULATION_OF_LEUKOCYTE_MEDIATED_IMMUNITY	53	0.773972	2.34409	5.88195e-09	3.40841e-07	2.73359e-07	1793	tags=49%, list=9%, signal=45%	IL7R/PTPRC/CD96/IL13RA2/FCGR2B/JAK3/CCR2/KLRD1/CD84/PTPN6/CD300A/HLA-F/SERPINB9/HLA-E/HLA-B/CLEC4G/HMOX1/BST2/LGALS9/ARRB2/KLRC1/HAVCR2/HLA-A/LILRB1/NOD2/C4BPA
GOBP_PATTERN_RECOGNITION_RECEPTOR_SIGNALING_PATHWAY	GOBP_PATTERN_RECOGNITION_RECEPTOR_SIGNALING_PATHWAY	184	0.57127	2.03182	5.99693e-09	3.44455e-07	2.76257e-07	2152	tags=33%, list=11%, signal=30%	FCN1/S100A8/PTPN22/CTSK/ITGB2/CTSS/FCRL3/IRAK3/CYBA/ITGAM/LYN/IRF4/TLR8/CD300A/IRF1/MYD88/SLC15A3/ESR1/CLEC4E/TNFAIP3/LILRA2/LBP/BTK/TIFA/BIRC3/NFKBIA/CD14/TLR2/FGA/CASP8/TLR4/ARRB2/LGMN/RELA/HAVCR2/RIPK2/TRAF3/IRAK4/CD40/FGG/MAP2K6/RNF135/RNF125/FGB/UBE2D1/TLR7/NOD2/TLR1/ALPK1/MAPKAPK3/CYLD/MFHAS1/RPS6KA3/USP15/CTSB/NR1H3/S100A9/IKBKE/LY96/WDFY1/TAB2
GOBP_T_CELL_MEDIATED_CYTOTOXICITY	GOBP_T_CELL_MEDIATED_CYTOTOXICITY	44	0.799736	2.33343	6.54353e-09	3.72583e-07	2.98816e-07	2131	tags=57%, list=11%, signal=51%	IL7R/PTPRC/IL23A/PRF1/FCGR2B/HLA-DRB1/KLRD1/HLA-DRA/CD1C/RAB27A/HLA-F/CD1A/HLA-E/HLA-B/CD1B/CD1E/KLRC1/IL12RB1/HLA-A/LILRB1/MR1/HLA-H/B2M/CTSH/RIPK3
GOCC_MHC_CLASS_II_PROTEIN_COMPLEX	GOCC_MHC_CLASS_II_PROTEIN_COMPLEX	14	0.954223	2.14641	6.71518e-09	3.7906e-07	3.04011e-07	764	tags=93%, list=4%, signal=89%	HLA-DRB4/HLA-DMB/HLA-DRB5/CD74/HLA-DPA1/HLA-DMA/HLA-DOA/HLA-DRB1/HLA-DPB1/HLA-DOB/HLA-DQA1/HLA-DRA/HLA-DQB1
GOBP_REGULATION_OF_CYTOSOLIC_CALCIUM_ION_CONCENTRATION	GOBP_REGULATION_OF_CYTOSOLIC_CALCIUM_ION_CONCENTRATION	324	0.497026	1.86655	7.47522e-09	4.18357e-07	3.35528e-07	2391	tags=26%, list=13%, signal=23%	CORO1A/PTPRC/MS4A1/CXCL9/CX3CR1/FYN/GPR65/CD38/GPR174/CCR7/CXCL10/SAA1/PTGER2/CD4/PTGER4/AVPR1A/CXCR6/CCR2/P2RY8/PDGFRA/CXCR4/LCK/PTPN6/PTGFR/LPAR6/LYN/CCR1/MCOLN2/BCL2/CYSLTR1/PTK2B/FPR1/C5AR1/CXCL11/CCR4/GPR18/RASA3/ESR1/P2RY10/CCR5/C3AR1/SLC8A1/CAPN3/CXCL13/RAMP3/CCRL2/APLNR/FPR3/CLIC2/HTR2B/TRPV2/ITPR1/PTH1R/JAK2/ATP2B4/LRP1/CX3CL1/LPAR1/BOK/P2RX7/PLN/P2RX1/PIK3CG/CNR1/PRNP/ANK2/ADRA1A/F2R/CC…
GOBP_POSITIVE_REGULATION_OF_TUMOR_NECROSIS_FACTOR_SUPERFAMILY_CYTOKINE_PRODUCTION	GOBP_POSITIVE_REGULATION_OF_TUMOR_NECROSIS_FACTOR_SUPERFAMILY_CYTOKINE_PRODUCTION	85	0.69079	2.23186	7.79534e-09	4.32575e-07	3.46931e-07	2575	tags=53%, list=14%, signal=46%	PTPRC/IL23A/CD2/SASH3/CYBA/CLEC7A/CCR2/SYK/CD86/ORM2/RASGRP1/PTAFR/SPN/MYD88/ORM1/IL33/HLA-E/LILRA2/LBP/CD14/TLR2/TYROBP/TLR4/LGALS9/DDT/HAVCR2/JAK2/RIPK2/IFNG/STAT3/NOD2/TLR1/PYCARD/CCL19/LILRA5/CLU/LY96/PF4/TWIST1/MAPKAPK2/CCL3/APP/PTPRJ/ARHGEF2/MIF
GOBP_CALCIUM_ION_TRANSPORT_INTO_CYTOSOL	GOBP_CALCIUM_ION_TRANSPORT_INTO_CYTOSOL	145	0.60761	2.11262	8.00843e-09	4.40666e-07	3.53419e-07	2391	tags=31%, list=13%, signal=27%	CORO1A/PTPRC/MS4A1/CXCL9/FYN/CCR7/CXCL10/CD4/LCK/PTPN6/LYN/MCOLN2/BCL2/PTK2B/CXCL11/RASA3/CCR5/SLC8A1/CAPN3/RAMP3/APLNR/CLIC2/HTR2B/TRPV2/ITPR1/ATP2B4/CX3CL1/P2RX7/PLN/PRNP/ANK2/ADRA1A/F2R/CCL19/ATP1A2/DRD1/CCL21/CALM1/PDE4D/BDKRB1/SLC24A1/CAMK2D/CALM3/CCL3/THY1
GOBP_DEFENSE_RESPONSE_TO_VIRUS	GOBP_DEFENSE_RESPONSE_TO_VIRUS	233	0.537038	1.97018	8.22186e-09	4.4864e-07	3.59815e-07	2175	tags=28%, list=11%, signal=25%	PTPRC/IL23A/PTPN22/PRF1/CXCL9/CXCL10/FGL2/IFITM1/NLRC5/APOBEC3C/APOBEC3A/GBP1/TRIM22/SAMHD1/FCN3/MLKL/OAS2/RNASE6/AIM2/TLR8/ISG20/IRF1/STAT1/BCL2/IL33/IFI16/FLNA/IFI44L/TNFAIP3/ISG15/BIRC3/APOBEC3G/NLRP1/BNIP3L/OASL/HTRA1/IRF9/BST2/IL12RB1/RELA/MX1/IFI27/TRAF3/LYST/MX2/CD40/IFNG/RNF135/RNF125/ZC3H12A/IFNA21/SLFN11/STAT2/TLR7/PMAIP1/IL2RA/LILRB1/CD207/PYCARD/IFITM3/USP15/IL10RB/IFITM2/RIPK3/PLA2G1…
GOCC_VESICLE_LUMEN	GOCC_VESICLE_LUMEN	306	0.500358	1.87111	9.27674e-09	5.02017e-07	4.02624e-07	2610	tags=34%, list=14%, signal=30%	FCN1/S100A8/LCN2/LYZ/MNDA/S100A12/CHIT1/GMFG/ARHGAP9/HSPA6/FERMT3/FGR/SRGN/DOCK2/BIN2/PLAC8/CFP/F13A1/PTPN6/CTSW/HGF/ORM2/ACTN2/COTL1/SPP2/A1BG/GSN/TIMP1/RAB27A/ORM1/APOA1/LRG1/TRAPPC1/PADI2/MAN2B1/CNN2/CTSZ/RNASET2/ALOX5/GSTP1/AMPD3/S100A11/SERPINF2/FGA/PTX3/GM2A/CRISPLD2/HPSE/OSTF1/PRKCD/SERPINA3/HP/MVP/TIMP2/NPC2/ITIH4/FGG/VEGFB/HK3/SERPINB1/PLG/SERPINA1/FGB/APRT/TIMP3/NFKB1/MMRN1/GRN/ALB/CAP1…
GOBP_NEGATIVE_REGULATION_OF_RESPONSE_TO_BIOTIC_STIMULUS	GOBP_NEGATIVE_REGULATION_OF_RESPONSE_TO_BIOTIC_STIMULUS	91	0.684038	2.24864	9.56569e-09	5.13411e-07	4.11762e-07	2783	tags=45%, list=15%, signal=39%	CD96/FGL2/NLRC5/SLAMF8/NLRC3/CARD16/IRAK3/KLRD1/SAMHD1/HLA-F/SERPINB9/IFI16/HLA-E/TNFAIP3/HLA-B/LILRA2/HTRA1/RPS19/CARD8/LGALS9/ARRB2/KLRC1/HAVCR2/DUSP10/HLA-A/SIRT2/TRAFD1/RNF125/PTPN2/GRN/IL2RA/LILRB1/NR1H3/LYAR/CRK/CR1/SERPING1/VSIG4/ARG1/TRIM21/KIR2DL4
GOCC_PLASMA_MEMBRANE_SIGNALING_RECEPTOR_COMPLEX	GOCC_PLASMA_MEMBRANE_SIGNALING_RECEPTOR_COMPLEX	182	0.578636	2.06055	1.0043e-08	5.34646e-07	4.28793e-07	1291	tags=20%, list=7%, signal=19%	TRBC1/TRAT1/CD8A/CD3D/IL2RB/ITGB2/CD3G/ITGA4/CSF2RB/SKAP1/CD3E/CD4/ITGAL/ITGBL1/APBB1IP/ITGB7/SYK/PTPN6/ITGAM/LYN/PTK2B/CD79A/TLR2/TRAF1/ITGAX/RAMP3/GABBR1/ITGA9/CD247/TRGV5/ZAP70/CNIH3/CD8B/IL12RB1/TRAF3/CD40
GOBP_NEGATIVE_REGULATION_OF_IMMUNE_EFFECTOR_PROCESS	GOBP_NEGATIVE_REGULATION_OF_IMMUNE_EFFECTOR_PROCESS	119	0.637303	2.16378	1.03983e-08	5.49099e-07	4.40385e-07	1793	tags=37%, list=9%, signal=34%	IL7R/PTPRC/CD96/FGL2/IL13RA2/SLAMF8/FCGR2B/FCRL3/JAK3/IRAK3/CCR2/ANXA1/KLRD1/CD84/PTPN6/CD300A/APOA1/HLA-F/IL33/SERPINB9/HLA-E/HLA-B/CLEC4G/CD22/HMOX1/HTRA1/RPS19/LGALS3/BST2/LGALS9/ARRB2/KLRC1/HAVCR2/IL4R/DUSP10/HLA-A/TNFSF18/RNF125/ZC3H12A/GRN/IL2RA/LILRB1/NOD2/C4BPA
GOBP_POSITIVE_REGULATION_OF_MAPK_CASCADE	GOBP_POSITIVE_REGULATION_OF_MAPK_CASCADE	475	0.450977	1.75391	1.31763e-08	6.90228e-07	5.53572e-07	2486	tags=28%, list=13%, signal=25%	PTPRC/CCL5/PTPN22/S100A12/CCR7/SAA1/RASSF2/CD74/CD4/FCGR2B/FCRL3/CD44/LAPTM5/CCL2/HLA-DRB1/CCL18/CLEC7A/PDGFRA/GPR183/CXCR4/SYK/PIK3R5/MARCO/CSF1R/GLIPR2/HGF/MLKL/CCR1/RASGRP1/TIAM1/BANK1/MYD88/IQGAP1/PTK2B/FGFR2/ICAM1/FPR1/C5AR1/SPI1/ARL6IP5/GNAI2/GPNMB/IL1B/NTRK2/TEK/TRAF1/MAP3K3/IGFBP3/SERPINF2/PLA2G2A/RAPGEF1/RAMP3/IL26/FGA/DUSP7/CD27/HTR2B/MAP4K1/GADD45B/TLR4/ADRA2A/NOTCH2/CFLAR/LGALS9/ARRB2…
GOBP_RESPONSE_TO_MOLECULE_OF_BACTERIAL_ORIGIN	GOBP_RESPONSE_TO_MOLECULE_OF_BACTERIAL_ORIGIN	310	0.496427	1.85996	1.35817e-08	7.05819e-07	5.66076e-07	2216	tags=35%, list=12%, signal=31%	S100A8/CCL5/PTPN22/CD96/IL24/CXCL9/CX3CR1/CSF2RB/IDO1/CCR7/CXCL10/VCAM1/LY86/PTGER4/FCGR2B/IL10RA/CASP1/CARD16/HCK/LILRB2/DCN/CCL2/IRF8/IRAK3/CD68/PTGFR/PDE4B/CD86/LYN/HAMP/PTAFR/VIM/TSPO/HPGD/TNFRSF1B/MYD88/PLSCR4/FGFR2/ICAM1/C5AR1/CXCL11/AKT1/CCR5/CXCL2/TNFAIP3/ASS1/FOS/LILRA2/LBP/IL1B/NFKBIA/CYP1A2/CD14/GSTP1/TLR2/MEF2C/CXCL13/CPS1/CASP8/MALT1/TLR4/SOD2/CARD8/LITAF/LGALS9/RELA/HAVCR2/JAK2/RIPK…
GOBP_REGULATION_OF_LEUKOCYTE_CHEMOTAXIS	GOBP_REGULATION_OF_LEUKOCYTE_CHEMOTAXIS	106	0.644226	2.17101	1.67033e-08	8.61205e-07	6.90697e-07	1982	tags=41%, list=10%, signal=37%	KLRK1/RAC2/CCL5/IL23A/BST1/CCR7/CXCL10/CD74/SLAMF8/CXCL12/CXCL14/CCL2/CCR2/AIF1/CSF1R/LYN/CCR1/PTK2B/C5AR1/PADI2/C3AR1/PLA2G7/NCKAP1L/LBP/CXCL13/PTN/MPP1/CALR/LGALS9/LGMN/DDT/CREB3/VEGFB/STAP1/MST1/TNFSF18/GPSM3/DUSP1/NOD2/VEGFC/MDK/CCL19/CCL21
GOBP_POSITIVE_REGULATION_OF_LYMPHOCYTE_DIFFERENTIATION	GOBP_POSITIVE_REGULATION_OF_LYMPHOCYTE_DIFFERENTIATION	98	0.663066	2.21748	1.74194e-08	8.91113e-07	7.14684e-07	1913	tags=39%, list=10%, signal=35%	IL7R/PTPRC/IL23A/CD74/RHOH/SASH3/LILRB2/HLA-DRB1/LEF1/ANXA1/RUNX3/SYK/CD86/HLA-DRA/INPP5D/ITPKB/NFKBIZ/CD83/NCKAP1L/BTK/CD27/MALT1/ZAP70/IL7/LGALS9/IL12RB1/ZBTB1/RIPK2/IL4R/GATA3/DUSP10/PCK1/IFNG/CD80/XBP1/IL2RA/MDK/CCL19
GOCC_MHC_PROTEIN_COMPLEX	GOCC_MHC_PROTEIN_COMPLEX	23	0.894539	2.27184	1.80009e-08	9.13718e-07	7.32813e-07	786	tags=74%, list=4%, signal=71%	HLA-DRB4/HLA-DMB/HLA-DRB5/CD74/HLA-DPA1/HLA-DMA/HLA-DOA/HLA-DRB1/HLA-DPB1/HLA-DOB/HLA-DQA1/HLA-DRA/HLA-F/HLA-E/HLA-B/HLA-DQB1/HLA-C
GOBP_T_CELL_MEDIATED_IMMUNITY	GOBP_T_CELL_MEDIATED_IMMUNITY	98	0.662162	2.21446	1.9742e-08	9.94388e-07	7.97512e-07	2718	tags=47%, list=14%, signal=40%	IL7R/PTPRC/CD8A/IL23A/PRF1/FCGR2B/SASH3/HLA-DRB1/CCR2/KLRD1/BTN3A3/HLA-DRA/CD1C/BTN3A2/TNFRSF1B/RAB27A/HLA-F/ICAM1/CD1A/HLA-E/HLA-B/IL1B/CD1B/CLEC4G/CD1E/MALT1/KLRC1/IL12RB1/ZBTB1/GATA3/HLA-A/CD81/LILRB1/NOD2/MR1/HLA-H/B2M/CTSH/RIPK3/MYO1G/TBX21/ARG1/LILRB4/IL18R1/WAS/AZGP1
GOBP_POSITIVE_REGULATION_OF_ALPHA_BETA_T_CELL_ACTIVATION	GOBP_POSITIVE_REGULATION_OF_ALPHA_BETA_T_CELL_ACTIVATION	65	0.723889	2.26098	2.2606e-08	1.12995e-06	9.06238e-07	1614	tags=45%, list=8%, signal=41%	PTPRC/IL23A/PTPN22/CD3E/SASH3/HLA-DRB1/CCR2/ANXA1/RUNX3/SYK/CD86/HLA-DRA/ITPKB/NFKBIZ/HLA-E/CD83/NCKAP1L/MALT1/ZAP70/LGALS9/IL12RB1/PRKCQ/RIPK2/IL4R/HLA-A/IFNG/CD80/CD28/CD81
GOBP_PLATELET_ACTIVATION	GOBP_PLATELET_ACTIVATION	154	0.585243	2.04284	2.30405e-08	1.14295e-06	9.16661e-07	2766	tags=40%, list=15%, signal=34%	PRKCB/FYN/PLEK/PRKCH/SAA1/LCP2/DGKA/GNG2/FCER1G/FERMT3/PDGFRA/LCK/SYK/PIK3R5/PTPN6/LYN/HBB/GP1BA/FLNA/CLIC1/FGA/TLR4/PRKCD/ADRA2A/RAP2B/ITPR1/ARRB2/VAV3/PRKCQ/DGKE/SELP/CD40/FGG/CD40LG/TLN1/P2RX1/FGB/APOE/TXK/PIK3CG/GNAS/VAV1/SRC/F2R/HRG/ARRB1/GNA15/DGKZ/PF4/AXL/GNB1/PLSCR1/ACTB/P2RY12/GNA11/RAF1/SH2B3/MAPK3/C1QTNF1/PDPN/CLEC1B
GOBP_REGULATION_OF_METAL_ION_TRANSPORT	GOBP_REGULATION_OF_METAL_ION_TRANSPORT	223	0.525275	1.91865	2.36636e-08	1.16503e-06	9.34369e-07	2399	tags=28%, list=13%, signal=25%	CORO1A/CCL5/CXCL9/FYN/CXCL10/CD4/FCRL3/CXCL12/FGF14/LILRB2/CCL2/CXCR4/CD84/PTPN6/PDE4B/GEM/LYN/CCR1/TSPO/BCL2/PTK2B/FXYD1/ICAM1/CXCL11/IL16/LILRA2/GNAI2/SLC8A1/CAPN3/RAMP3/APLNR/CLIC2/LGALS3/TRPV2/ADRA2A/ARRB2/STIM2/CX3CL1/P2RX7/PLN/P2RX1/GNAO1/PIK3CG/LILRB1/PRNP/EPB41/ATP1B2/ANK2/CD33/F2R/LILRA5/ATP1A2/DRD1/CALM1/PDE4D/BDKRB1/CACNB2/CAMK2D/CALM3/CCL3/THY1/P2RY12
GOBP_NEGATIVE_REGULATION_OF_INNATE_IMMUNE_RESPONSE	GOBP_NEGATIVE_REGULATION_OF_INNATE_IMMUNE_RESPONSE	60	0.733119	2.24931	2.51169e-08	1.22735e-06	9.84354e-07	2783	tags=55%, list=15%, signal=47%	CD96/NLRC5/SLAMF8/NLRC3/IRAK3/KLRD1/SAMHD1/HLA-F/SERPINB9/IFI16/HLA-E/TNFAIP3/HLA-B/RPS19/LGALS9/ARRB2/KLRC1/HAVCR2/DUSP10/HLA-A/TRAFD1/PTPN2/GRN/LILRB1/NR1H3/LYAR/CRK/CR1/SERPING1/VSIG4/ARG1/TRIM21/KIR2DL4
GOBP_GRANULOCYTE_CHEMOTAXIS	GOBP_GRANULOCYTE_CHEMOTAXIS	110	0.640638	2.16784	2.60394e-08	1.26301e-06	1.01295e-06	1982	tags=41%, list=10%, signal=37%	RAC2/S100A8/CCL5/IL23A/ITGB2/CXCL9/S100A12/BST1/CCR7/CXCL10/SAA1/CD74/FCER1G/CCL2/CCL18/ANXA1/SYK/PIK3CD/CSF1R/PDE4B/C5AR1/CXCL11/CXCL2/C3AR1/NCKAP1L/LBP/PREX1/CXCL13/LGALS3/MPP1/VAV3/CX3CL1/CCL8/CCL20/TNFSF18/PIK3CG/PPBP/CSF3R/NOD2/MDK/VAV1/CCL19/PPIB/S100A9/CCL21
GOBP_ANTIGEN_PROCESSING_AND_PRESENTATION	GOBP_ANTIGEN_PROCESSING_AND_PRESENTATION	225	0.531631	1.93365	2.9024e-08	1.39742e-06	1.12075e-06	2409	tags=33%, list=13%, signal=29%	HLA-DRB4/CD8A/CYBB/CCR7/HLA-DMB/HLA-DRB5/FGL2/CD74/FCGR2B/FCER1G/CTSS/HLA-DPA1/HLA-DMA/LILRB2/HLA-DOA/HLA-DRB1/AP1S2/HLA-DPB1/CYBA/HLA-DOB/TAP1/CD68/IFI30/CLEC4A/PSMB9/HLA-DQA1/ERAP2/HLA-DRA/CD1C/RAB27A/NCF2/HLA-F/ICAM1/CD1A/HLA-E/PSMB8/HLA-B/HLA-DQB1/CD1B/HLA-C/RAB8B/TAPBP/CD1E/WDFY4/AP2M1/CALR/DYNC1I1/DYNLL1/LGMN/TAP2/HLA-A/CLEC4M/CAPZB/PSME1/PSME2/SLC11A1/DCTN3/NOD2/CD207/PYCARD/MR1/HLA-H/ACTR…
GOBP_LYMPHOCYTE_HOMEOSTASIS	GOBP_LYMPHOCYTE_HOMEOSTASIS	57	0.741781	2.27404	3.22823e-08	1.54295e-06	1.23747e-06	1811	tags=40%, list=10%, signal=37%	CORO1A/GPR174/DOCK11/CD74/JAK3/TNFSF13B/FAS/DOCK10/GAPT/LYN/BCL2/AKT1/TNFAIP3/NCKAP1L/MEF2C/TNFRSF17/TNFSF14/LGALS9/SIT1/TSC22D3/PMAIP1/IL2RA/TNFRSF13B
GOBP_TOLL_LIKE_RECEPTOR_SIGNALING_PATHWAY	GOBP_TOLL_LIKE_RECEPTOR_SIGNALING_PATHWAY	141	0.597167	2.07199	3.36756e-08	1.59788e-06	1.28152e-06	3178	tags=46%, list=17%, signal=39%	S100A8/PTPN22/CTSK/ITGB2/CTSS/FCRL3/IRAK3/CYBA/ITGAM/LYN/IRF4/TLR8/CD300A/IRF1/MYD88/ESR1/TNFAIP3/LILRA2/LBP/BTK/BIRC3/NFKBIA/CD14/TLR2/FGA/CASP8/TLR4/ARRB2/LGMN/HAVCR2/RIPK2/TRAF3/IRAK4/CD40/FGG/FGB/UBE2D1/TLR7/NOD2/TLR1/MAPKAPK3/MFHAS1/RPS6KA3/CTSB/NR1H3/S100A9/IKBKE/LY96/WDFY1/TAB2/MAPKAPK2/PTPRS/GFI1/TANK/UBC/IRF7/UBA52/CD300LF/BCL10/IRF3/RFTN1/HMGB1/UBB/IFI35/RIPK1
GOBP_RESPONSE_TO_FUNGUS	GOBP_RESPONSE_TO_FUNGUS	46	0.769743	2.26614	3.61519e-08	1.70304e-06	1.36586e-06	2652	tags=39%, list=14%, signal=34%	S100A8/GNLY/S100A12/CLEC7A/SYK/HAMP/COTL1/MYD88/BTK/PTX3/MALT1/TLR4/CLEC6A/HRG/S100A9/CRK/ARG1/RARRES2
GOCC_ENDOCYTIC_VESICLE	GOCC_ENDOCYTIC_VESICLE	294	0.500691	1.86323	3.72409e-08	1.74181e-06	1.39695e-06	2341	tags=27%, list=12%, signal=24%	HLA-DRB4/RAC2/CORO1A/GNLY/CYBB/SAA1/MPEG1/HLA-DRB5/CD74/AVPR1A/CTSS/HLA-DPA1/HLA-DRB1/HLA-DPB1/CYBA/TAP1/SYK/HLA-DQA1/MARCO/HVCN1/HLA-DRA/HBB/VIM/GSN/NCF2/APOA1/HLA-F/HLA-E/ATP6V0C/HLA-B/TLR2/HLA-DQB1/HLA-C/RAB8B/CTLA4/RAB31/RAPGEF1/TAPBP/ATP6V0D1/EHD1/AP2M1/CALR/SH3KBP1/HP/FMNL1/ARRB2/STAB1/LRP1/TAP2/RAB20/HLA-A/LPAR1/ZYX/GOLIM4/INPP5B/TLR7/RAB43/APOE/CD163/RABEP1/HPX/SLC11A1/STX4/SYT11/NOD2/CD2…
GOBP_CALCIUM_ION_TRANSPORT	GOBP_CALCIUM_ION_TRANSPORT	372	0.466052	1.77098	4.31218e-08	2.00256e-06	1.60608e-06	2425	tags=22%, list=13%, signal=20%	CORO1A/PTPRC/CCL5/MS4A1/PRKCB/CXCL9/FYN/CCR7/CXCL10/CD4/FCRL3/CXCL12/FGF14/ATP2A3/LILRB2/CCL2/CACNA2D3/CXCR4/LCK/CD84/PTPN6/PDE4B/GEM/LYN/CCR1/TSPO/GPM6A/MCOLN2/BCL2/CYSLTR1/PTK2B/ICAM1/CXCL11/RASA3/CCR5/IL16/LILRA2/GNAI2/SLC8A1/CAPN3/SLC24A4/RAMP3/APLNR/CLIC2/HTR2B/LGALS3/TRPV2/ADRA2A/ITPR1/ARRB2/STIM2/ATP2B4/CX3CL1/P2RX7/PLN/CCL8/P2RX1/GNAO1/PIK3CG/LILRB1/PRNP/EPB41/ANK2/ADRA1A/CD33/F2R/CCL19/L…
GOBP_POSITIVE_REGULATION_OF_LEUKOCYTE_MIGRATION	GOBP_POSITIVE_REGULATION_OF_LEUKOCYTE_MIGRATION	125	0.613623	2.08555	4.64032e-08	2.13977e-06	1.71613e-06	2460	tags=42%, list=13%, signal=37%	RAC2/CCL5/IL23A/CX3CR1/ITGA4/DOCK8/CCR7/CXCL10/CD74/CXCL12/CXCL14/CCR2/AIF1/CSF1R/JAM2/CCR1/PTAFR/SPN/PTK2B/ICAM1/C5AR1/C3AR1/PLA2G7/NCKAP1L/LBP/CXCL13/PTN/LGALS3/CALR/LGALS9/LGMN/SELP/CREB3/CX3CL1/VEGFB/CCL8/CCL20/TNFSF18/CD99/GPSM3/PYCARD/VEGFC/MDK/CCL19/CCL21/BDKRB1/TNFRSF14/PLVAP/TREM2/CCL3/THY1/P2RY12/APP
GOMF_MHC_PROTEIN_BINDING	GOMF_MHC_PROTEIN_BINDING	25	0.866711	2.23394	4.99726e-08	2.28826e-06	1.83521e-06	1708	tags=64%, list=9%, signal=58%	CD8A/CD74/CD4/LILRB2/CLEC7A/TAP1/KLRD1/FCRL6/PILRA/HLA-E/TAPBP/CD244/CD8B/TAP2/CD81/LILRB1
GOBP_NEUTROPHIL_CHEMOTAXIS	GOBP_NEUTROPHIL_CHEMOTAXIS	90	0.661472	2.16957	5.40116e-08	2.45603e-06	1.96977e-06	1982	tags=47%, list=10%, signal=42%	RAC2/S100A8/CCL5/IL23A/ITGB2/CXCL9/S100A12/BST1/CCR7/CXCL10/SAA1/CD74/FCER1G/CCL2/CCL18/SYK/PIK3CD/PDE4B/C5AR1/CXCL11/CXCL2/C3AR1/NCKAP1L/LBP/PREX1/CXCL13/LGALS3/MPP1/VAV3/CX3CL1/CCL8/CCL20/PIK3CG/PPBP/CSF3R/NOD2/MDK/VAV1/CCL19/PPIB/S100A9/CCL21
GOBP_CYTOSOLIC_CALCIUM_ION_TRANSPORT	GOBP_CYTOSOLIC_CALCIUM_ION_TRANSPORT	155	0.586032	2.04791	5.97351e-08	2.69755e-06	2.16347e-06	2391	tags=30%, list=13%, signal=26%	CORO1A/PTPRC/MS4A1/CXCL9/FYN/CCR7/CXCL10/CD4/ATP2A3/LCK/PTPN6/LYN/MCOLN2/BCL2/PTK2B/CXCL11/RASA3/CCR5/SLC8A1/CAPN3/RAMP3/APLNR/CLIC2/HTR2B/TRPV2/ITPR1/ATP2B4/CX3CL1/P2RX7/PLN/PRNP/ANK2/ADRA1A/F2R/CCL19/ATP1A2/DRD1/CCL21/CALM1/PDE4D/BDKRB1/SLC24A1/CAMK2D/CALM3/CCL3/THY1
GOCC_TERTIARY_GRANULE	GOCC_TERTIARY_GRANULE	154	0.575506	2.00885	6.54185e-08	2.93398e-06	2.35309e-06	2699	tags=43%, list=14%, signal=37%	ITGB2/LYZ/CD53/CYBB/CHIT1/MMP9/FCER1G/CTSS/LILRB2/CYBA/CFP/PTPN6/ITGAM/PTAFR/HBB/CD300A/ORM1/LRG1/FPR1/ATP6V0C/CNN2/NCKAP1L/LAIR1/KCNAB2/ITGAX/CST3/PTX3/ASAH1/LGALS3/RAP2B/VAMP1/PRCP/HP/DYNLL1/TIMP2/NFASC/PGM1/SLC11A1/ALDOA/PPBP/STOM/CLEC4D/FCAR/LTA4H/CD33/SERPINB6/TBC1D10C/RAB14/DOK3/B2M/CTSH/TMEM179B/DBNL/SIGLEC14/SIRPA/YPEL5/SIGLEC5/NBEAL2/CR1/CLEC12A/LILRA3/CSTB/TCIRG1/AP2A2/FTH1/STXBP2
GOBP_INTERLEUKIN_8_PRODUCTION	GOBP_INTERLEUKIN_8_PRODUCTION	80	0.688318	2.2122	7.78201e-08	3.46644e-06	2.78013e-06	1974	tags=39%, list=10%, signal=35%	FCN1/PTPRC/PTPN22/CD74/CD2/CRP/CLEC7A/ANXA1/SYK/TLR8/MYD88/KLF4/LILRA2/LBP/IL1B/CD14/TLR2/CD244/TLR4/LGALS9/IL17D/RELA/TLR7/STAT3/NOD2/TLR1/PYCARD/CD33/F2R/TMSB4X/ARRB1
GOBP_COAGULATION	GOBP_COAGULATION	317	0.481322	1.80493	7.89498e-08	3.49299e-06	2.80143e-06	2766	tags=31%, list=15%, signal=27%	PRKCB/FYN/DOCK8/PLEK/PRKCH/SAA1/LCP2/DGKA/GNG2/DOCK11/FCER1G/FERMT3/PDGFRA/LCK/SYK/F13A1/PIK3R5/PTPN6/LYN/HBB/IRF1/RAB27A/GP1BA/FLNA/F9/CLIC1/SERPINF2/FGA/ENTPD1/EHD1/VTN/HPSE/TLR4/PRKCD/ADRA2A/RAP2B/PLAT/PRCP/ITPR1/ARRB2/VAV3/JAK2/PRKCQ/PLAUR/MICAL1/DGKE/SELP/GATA3/CD40/FGG/SERPINA10/PRKACB/KLKB1/P2RX7/VKORC1/ANXA5/CD40LG/TLN1/PLG/SERPINA1/P2RX1/IFNA21/FGB/CAPZB/PROZ/MMRN1/PRKAR2B/APOE/TXK/PIK3C…
GOBP_REGULATION_OF_MONONUCLEAR_CELL_MIGRATION	GOBP_REGULATION_OF_MONONUCLEAR_CELL_MIGRATION	101	0.639585	2.14592	8.02302e-08	3.52582e-06	2.82775e-06	2652	tags=48%, list=14%, signal=41%	KLRK1/CCL5/ITGA4/DOCK8/CCR7/CXCL10/SLAMF8/CXCL12/CXCL14/CCL2/CCR2/AIF1/CSF1R/JAM2/LYN/CCR1/SPN/BMP5/PTK2B/C5AR1/PADI2/AKT1/C3AR1/PLA2G7/MSN/STK10/CXCL13/LGALS3/CALR/LGALS9/LGMN/CREB3/LRCH1/CCL20/TNFSF18/CD200/DUSP1/PYCARD/MDK/CCL21/RIPK3/CRK/TNFRSF14/CCL3/APP/SLIT2/MAPK3/RARRES2
GOBP_RESPONSE_TO_VIRUS	GOBP_RESPONSE_TO_VIRUS	321	0.480918	1.80035	8.25544e-08	3.60377e-06	2.89027e-06	2175	tags=26%, list=11%, signal=24%	PTPRC/CCL5/IL23A/PTPN22/PRF1/CXCL9/POU2AF1/CXCL10/FGL2/IFITM1/NLRC5/APOBEC3C/FGR/CXCL12/APOBEC3A/IRAK3/GBP1/TRIM22/CXCR4/SAMHD1/FCN3/MLKL/OAS2/RNASE6/AIM2/TLR8/ISG20/IRF1/MYD88/STAT1/BCL2/IL33/IFI16/FLNA/IFI44L/TNFAIP3/ISG15/BIRC3/APOBEC3G/NLRP1/BNIP3L/OASL/HTRA1/IRF9/WDFY4/BST2/LGALS9/IL12RB1/RELA/MX1/NPC2/IFI27/PIM2/TRAF3/LYST/GATA3/MX2/CD40/IFNG/CCL8/RNF135/RNF125/ZC3H12A/IFNA21/EEF1G/SLFN11/S…
GOBP_PEPTIDYL_TYROSINE_MODIFICATION	GOBP_PEPTIDYL_TYROSINE_MODIFICATION	349	0.468571	1.77503	8.54149e-08	3.70395e-06	2.97062e-06	2659	tags=29%, list=14%, signal=25%	PTPRC/CCL5/IL23A/ITK/IL24/ITGB2/FYN/BST1/CD3E/CD74/CD4/FGR/HCK/EFEMP1/CD44/SAMSN1/JAK3/CLEC7A/HCLS1/PDGFRA/LCK/SYK/PTPN6/CSF1R/EPHA3/HGF/LYN/BANK1/CD300A/GPRC5B/IQGAP1/PTK2B/FGFR2/ICAM1/SEMA4D/BTK/PECAM1/NTRK2/TEK/TPST2/VTN/ZAP70/PRKCD/ADRA2A/RAP2B/IL7/MVP/ARRB2/TNK2/FLT3/JAK2/RIPK2/CD40/TP53/IFNG/CBL/STAP1/MAP2K6/HIPK3/TNFSF18/CD80/PTPN2/EREG/CD81/TXK/UNC119/STAT3/HPX/DYRK2/SOCS3/SFRP1/GHR/PRNP/…
GOBP_PRODUCTION_OF_MOLECULAR_MEDIATOR_OF_IMMUNE_RESPONSE	GOBP_PRODUCTION_OF_MOLECULAR_MEDIATOR_OF_IMMUNE_RESPONSE	183	0.55673	1.98176	9.79278e-08	4.21863e-06	3.38339e-06	1753	tags=27%, list=9%, signal=25%	PTPRC/IGLV1-44/PTPN22/CD96/IL13RA2/CD74/FCGR2B/FCRL3/SASH3/LAPTM5/JAK3/HLA-DRB1/IRAK3/CLEC7A/CCR2/GAPT/HK1/PGC/SAMHD1/CD226/CD86/TNFRSF1B/GPRC5B/APOA1/HLA-F/IL33/HLA-E/BTK/CTNNBL1/IL1B/HLA-DQB1/CD22/HMOX1/CD244/MALT1/TLR4/BST2/RNF168/IL4R/GATA3/CD40/HLA-A/CD40LG/CD28/CD81/XBP1/HPX/STX4/LILRB1/NOD2
GOBP_REGULATION_OF_LEUKOCYTE_APOPTOTIC_PROCESS	GOBP_REGULATION_OF_LEUKOCYTE_APOPTOTIC_PROCESS	77	0.684878	2.19615	1.04978e-07	4.4928e-06	3.60329e-06	2245	tags=42%, list=12%, signal=37%	IL7R/CCL5/CD3G/DOCK8/IDO1/CCR7/CD74/CXCL12/JAK3/ANXA1/HCLS1/PIK3CD/LYN/GIMAP8/ITPKB/BTK/MEF2C/CD27/ST3GAL1/LGALS3/LGALS9/PRKCQ/TSC22D3/TP53/BMP4/LILRB1/NOD2/CCL19/CCL21/RIPK3/AXL/CDKN2A
GOBP_LEUKOCYTE_APOPTOTIC_PROCESS	GOBP_LEUKOCYTE_APOPTOTIC_PROCESS	98	0.642821	2.14978	1.16287e-07	4.94448e-06	3.96554e-06	2245	tags=37%, list=12%, signal=33%	IL7R/CCL5/CD3G/DOCK8/IDO1/CCR7/CD74/CXCL12/JAK3/ANXA1/HCLS1/FAS/PIK3CD/LYN/GIMAP8/ITPKB/AKT1/BTK/PLEKHO2/MEF2C/CD27/ST3GAL1/LGALS3/LGALS9/PRKCQ/TSC22D3/TP53/BMP4/IL2RA/LILRB1/NOD2/CCL19/CCL21/RIPK3/AXL/CDKN2A
GOBP_REGULATION_OF_CYSTEINE_TYPE_ENDOPEPTIDASE_ACTIVITY	GOBP_REGULATION_OF_CYSTEINE_TYPE_ENDOPEPTIDASE_ACTIVITY	214	0.524636	1.91338	1.22682e-07	5.18117e-06	4.15536e-06	1980	tags=30%, list=10%, signal=28%	S100A8/FYN/MMP9/CASP1/CARD16/ATP2A3/CD44/LAPTM5/CLEC7A/FAS/TNFSF10/PSMB9/LCK/SYK/FABP1/TNFAIP8/HGF/AIM2/GSN/MEFV/RPS6KA1/LAMP3/SERPINB9/IFI16/KLF4/AKT1/ARL6IP5/BIRC3/NLRP1/CIDEB/AQP1/CD27/CASP8/NGFR/MALT1/NLRP12/TNFSF14/CFLAR/CARD8/LGALS9/ARRB2/LGMN/IGBP1/JAK2/DAPK1/PLAUR/RIPK2/MICAL1/CDKN2D/CASP10/BOK/P2RX1/CST7/DLC1/PMAIP1/ANP32B/TRADD/GPX1/SIAH2/PYCARD/SRC/RPS6KA3/F2R/ARRB1/S100A9
GOBP_REGULATION_OF_T_CELL_MEDIATED_IMMUNITY	GOBP_REGULATION_OF_T_CELL_MEDIATED_IMMUNITY	75	0.671205	2.14434	1.23436e-07	5.18117e-06	4.15536e-06	2718	tags=51%, list=14%, signal=44%	IL7R/PTPRC/IL23A/FCGR2B/SASH3/HLA-DRB1/CCR2/KLRD1/HLA-DRA/CD1C/TNFRSF1B/HLA-F/CD1A/HLA-E/HLA-B/IL1B/CD1B/CLEC4G/CD1E/MALT1/KLRC1/IL12RB1/ZBTB1/GATA3/HLA-A/CD81/LILRB1/NOD2/MR1/HLA-H/B2M/RIPK3/TBX21/ARG1/LILRB4/IL18R1/WAS/AZGP1
GOCC_FICOLIN_1_RICH_GRANULE	GOCC_FICOLIN_1_RICH_GRANULE	178	0.551838	1.9589	1.34935e-07	5.62771e-06	4.5135e-06	2666	tags=39%, list=14%, signal=34%	FCN1/ITGB2/MNDA/GMFG/MMP9/FGL2/HSPA6/FCER1G/CTSS/LILRB2/BIN2/HBB/COTL1/A1BG/GSN/CD300A/LRG1/FPR1/ATP6V0C/CTSZ/NCKAP1L/PLEKHO2/ALOX5/GSTP1/AMPD3/ITGAX/CST3/CRISPLD2/OSTF1/ASAH1/LGALS3/PRCP/MVP/DYNLL1/TIMP2/NFASC/HK3/SERPINA1/PGM1/SLC11A1/ALDOA/CLEC4D/IMPDH1/FCAR/LTA4H/SERPINB6/TBC1D10C/ACTR1B/DOK3/CTSB/PRG2/CTSH/TMEM179B/DBNL/SIGLEC14/SIRPA/YPEL5/ALAD/GYG1/SIGLEC5/ACTR2/NBEAL2/CR1/LILRA3/CSTB/EEF2…
GOBP_POSITIVE_REGULATION_OF_B_CELL_ACTIVATION	GOBP_POSITIVE_REGULATION_OF_B_CELL_ACTIVATION	75	0.668646	2.13617	1.40033e-07	5.80337e-06	4.65438e-06	1892	tags=39%, list=10%, signal=35%	TRBC1/IGHA1/PTPRC/IGHM/CD38/BST1/CD74/FCRL3/SASH3/TNFSF13B/GPR183/SYK/INPP5D/BCL2/NCKAP1L/BTK/NFATC2/MEF2C/CD27/TLR4/IL7/SH3KBP1/VAV3/CD40/CD28/CD81/XBP1/NOD2/IGKC
GOBP_REGULATION_OF_T_CELL_MEDIATED_CYTOTOXICITY	GOBP_REGULATION_OF_T_CELL_MEDIATED_CYTOTOXICITY	36	0.811466	2.25073	1.71271e-07	7.05333e-06	5.65686e-06	2131	tags=61%, list=11%, signal=54%	IL7R/PTPRC/IL23A/FCGR2B/HLA-DRB1/KLRD1/HLA-DRA/CD1C/HLA-F/CD1A/HLA-E/HLA-B/CD1B/CD1E/KLRC1/IL12RB1/HLA-A/LILRB1/MR1/HLA-H/B2M/RIPK3
GOBP_POSITIVE_REGULATION_OF_INTERLEUKIN_1_PRODUCTION	GOBP_POSITIVE_REGULATION_OF_INTERLEUKIN_1_PRODUCTION	59	0.728045	2.22135	1.73093e-07	7.08382e-06	5.68131e-06	1925	tags=53%, list=10%, signal=47%	MNDA/SAA1/CASP1/PYHIN1/CLEC7A/HK1/ORM2/AIM2/TLR8/ORM1/IFI16/IL16/LILRA2/NLRP1/TYROBP/CASP8/MALT1/TLR4/NLRP12/CARD8/LGALS9/HAVCR2/JAK2/RIPK2/IFNG/P2RX7/STAT3/NOD2/PYCARD/CCL19/LILRA5
GOBP_NEGATIVE_REGULATION_OF_LEUKOCYTE_CELL_CELL_ADHESION	GOBP_NEGATIVE_REGULATION_OF_LEUKOCYTE_CELL_CELL_ADHESION	118	0.611056	2.06816	1.77433e-07	7.21634e-06	5.78759e-06	2722	tags=46%, list=14%, signal=39%	PTPN22/IDO1/FGL2/CD74/FCGR2B/CXCL12/LILRB2/LAPTM5/JAK3/HLA-DRB1/ANXA1/RUNX3/PTPN6/CD86/SPN/PLA2G2D/CD300A/IRF1/KLF4/AKT1/ASS1/GPNMB/FGL1/CLEC4G/CTLA4/PAG1/LGALS3/LGALS9/HAVCR2/IL4R/LRRC32/PDCD1LG2/TNFSF18/ZC3H12A/BMP4/CD80/PTPN2/LAX1/IL2RA/LILRB1/PRNP/MDK/CCL21/PPARA/CCL25/TNFRSF14/CR1/TBX21/CRTAM/VSIG4/CBLB/ARG1/LILRB4/CCL28
GOBP_NEGATIVE_REGULATION_OF_INTERLEUKIN_6_PRODUCTION	GOBP_NEGATIVE_REGULATION_OF_INTERLEUKIN_6_PRODUCTION	40	0.782325	2.24055	1.79672e-07	7.26231e-06	5.82447e-06	2779	tags=65%, list=15%, signal=56%	PTPN22/C1QTNF3/NLRC3/IRAK3/PTPN6/HGF/KLF2/BANK1/INPP5D/ORM1/TNFAIP3/NCKAP1L/TLR4/NLRP12/ARRB2/HAVCR2/CX3CL1/SLAMF1/ZC3H12A/CD200/SYT11/ARRB1/SIRPA/CSK/LILRB4/TNF
GOBP_POSITIVE_REGULATION_OF_LOCOMOTION	GOBP_POSITIVE_REGULATION_OF_LOCOMOTION	497	0.422986	1.65494	2.0229e-07	8.12635e-06	6.51743e-06	2399	tags=29%, list=13%, signal=26%	RAC2/CORO1A/PTPRC/CCL5/IL23A/CX3CR1/ITGA4/DOCK8/CCR7/CXCL10/MMP9/CD74/FERMT3/FGR/SPOCK2/CXCL12/SMOC2/CXCL14/CLEC7A/CCR2/LEF1/ANXA1/ETS1/PDGFRA/AIF1/CXCR4/PIK3CD/CSF1R/GLIPR2/JAM2/HGF/LYN/CCR1/PTAFR/TIAM1/SPN/TERT/LGR6/DEFB1/IQGAP1/BCL2/PTK2B/ICAM1/SEMA4D/C5AR1/FLNA/AKT1/CCR4/C3AR1/IL16/PLA2G7/STK4/NCKAP1L/LBP/GNAI2/PECAM1/PREX1/GPNMB/IL1B/SEMA4A/ATM/TEK/SLC8A1/MAP3K3/S100A11/AKT3/ITGAX/CXCL13/HMO…
GOBP_POSITIVE_REGULATION_OF_I_KAPPAB_KINASE_NF_KAPPAB_SIGNALING	GOBP_POSITIVE_REGULATION_OF_I_KAPPAB_KINASE_NF_KAPPAB_SIGNALING	174	0.547204	1.93443	2.18185e-07	8.71145e-06	6.9867e-06	2152	tags=35%, list=11%, signal=31%	PRKCB/FYN/S100A12/CCR7/S100A4/CD74/CD4/CASP1/CARD16/APOL3/HLA-DRB1/TRIM22/TNFSF10/GPRC5B/MYD88/FLNA/TIFA/BIRC3/MAP3K3/HMOX1/CASP8/HTR2B/MALT1/TLR4/SLC44A2/CFLAR/LITAF/BST2/LGALS9/RELA/SECTM1/RIPK2/PIM2/PELI2/TRIM68/S100B/IRAK4/CX3CL1/CD40/CASP10/LPAR1/REL/TRIM8/TRIM25/LGALS1/TRADD/CLEC6A/TERF2IP/TRIM38/NOD2/MIB2/ALPK1/TRIM14/F2R/CCL19/RBCK1/CCL21/NEK6/IKBKE/TGM2/TAB2
GOBP_T_CELL_DIFFERENTIATION_IN_THYMUS	GOBP_T_CELL_DIFFERENTIATION_IN_THYMUS	71	0.691719	2.18136	2.23319e-07	8.86237e-06	7.10774e-06	1581	tags=30%, list=8%, signal=27%	IL7R/PTPRC/CD3D/CD3G/CCR7/CD3E/CD74/BCL11B/DOCK2/BCL2/ITPKB/MAFB/IL1B/ZAP70/ZBTB1/ZFP36L2/GATA3/TP53/BMP4/CD28/PTPN2
GOBP_FC_RECEPTOR_MEDIATED_STIMULATORY_SIGNALING_PATHWAY	GOBP_FC_RECEPTOR_MEDIATED_STIMULATORY_SIGNALING_PATHWAY	84	0.662299	2.13086	2.26516e-07	8.93509e-06	7.16605e-06	2694	tags=44%, list=14%, signal=38%	PTPRC/IGLV1-44/CD3G/FYN/WIPF1/FCGR2B/FCER1G/FGR/HCK/FCGR3A/FCGR2A/SYK/CD226/LYN/NCKAP1L/ARPC2/RAPGEF1/CD247/PRKCD/WASF2/VAV3/ELMO2/VAV1/SRC/IGKC/ARPC4/MYO1G/CRK/ACTR2/PLSCR1/ACTB/ACTR3/PTPRJ/LIMK1/MAPK3/CSK/WAS
GOBP_REACTIVE_OXYGEN_SPECIES_METABOLIC_PROCESS	GOBP_REACTIVE_OXYGEN_SPECIES_METABOLIC_PROCESS	242	0.507785	1.86853	2.28856e-07	8.97333e-06	7.19673e-06	1864	tags=25%, list=10%, signal=23%	RAC2/ITGB2/CX3CR1/FYN/CYBB/BST1/FBLN5/CRP/CYBA/CLEC7A/SYK/NQO1/ITGAM/HVCN1/KLF2/HBB/TSPO/RAB27A/AGXT2/NCF2/BCL2/PTK2B/ICAM1/KLF4/AKT1/PTGIS/ASS1/GNAI2/ALOX5/PREX1/IL1B/CYP1A2/GSTP1/TLR2/CPS1/PDK3/PTX3/TYROBP/BCO2/TLR4/PRKCD/SOD2/GCHFR/CFLAR/PRCP/HP/DYNLL1/GLS2/JAK2/ATP2B4/LRRK2/TP53/IFNG/SIRT2/ZC3H12A/GCH1/PMAIP1/GPX1/PLIN5/VAV1/GLA
GOBP_T_CELL_MIGRATION	GOBP_T_CELL_MIGRATION	61	0.712424	2.19188	2.35673e-07	9.18562e-06	7.36698e-06	2460	tags=52%, list=13%, signal=46%	CCL5/ITGA4/DOCK8/CXCL10/ITGAL/CXCL12/CCL2/CCR2/ITGB7/GPR183/AIF1/PIK3CD/SPN/ICAM1/CXCL11/MSN/CXCL13/ZAP70/LRCH1/CCL20/CD99/CD200/PIK3CG/PYCARD/CCL21/S1PR1/RIPK3/MYO1G/CRK/TNFRSF14/CCL3/APP
GOBP_POSITIVE_REGULATION_OF_RESPONSE_TO_BIOTIC_STIMULUS	GOBP_POSITIVE_REGULATION_OF_RESPONSE_TO_BIOTIC_STIMULUS	239	0.507977	1.86565	2.38066e-07	9.22398e-06	7.39775e-06	2152	tags=27%, list=11%, signal=24%	FCN1/KLRK1/CCL5/GBP5/MNDA/FYN/NLRC5/SLAMF6/LY86/FCER1G/HCK/PYHIN1/HLA-DRB1/CYBA/KLRD1/CLEC4A/PGC/PSMB9/SYK/CD226/LYN/RASGRP1/AIM2/TLR8/SH2D1A/HLA-F/IFI16/HLA-E/PSMB8/CLEC4E/LILRA2/LBP/TYROBP/MALT1/RPS19/TLR4/PRKCD/ICAM3/RELA/HAVCR2/NCR3/SH2D1B/PRKACB/NFKB1/EREG/PSME1/TXK/GRN/PSME2/HPX/MUC15/CLEC6A/CLEC4D/NOD2/PYCARD/MR1/VAV1/SRC/USP15/HRG/IKBKE/LY96/ICAM2/TAB2
GOBP_REGULATION_OF_REACTIVE_OXYGEN_SPECIES_METABOLIC_PROCESS	GOBP_REGULATION_OF_REACTIVE_OXYGEN_SPECIES_METABOLIC_PROCESS	168	0.556217	1.96103	2.56314e-07	9.87261e-06	7.91796e-06	1570	tags=27%, list=8%, signal=25%	RAC2/ITGB2/CX3CR1/FYN/BST1/FBLN5/CRP/CYBA/CLEC7A/SYK/ITGAM/HVCN1/KLF2/HBB/TSPO/RAB27A/AGXT2/BCL2/PTK2B/ICAM1/KLF4/AKT1/PTGIS/ASS1/GNAI2/ALOX5/IL1B/GSTP1/PDK3/PTX3/TYROBP/BCO2/TLR4/PRKCD/SOD2/CFLAR/PRCP/HP/DYNLL1/JAK2/ATP2B4/TP53/IFNG/SIRT2/ZC3H12A/GCH1
GOBP_REGULATION_OF_PRODUCTION_OF_MOLECULAR_MEDIATOR_OF_IMMUNE_RESPONSE	GOBP_REGULATION_OF_PRODUCTION_OF_MOLECULAR_MEDIATOR_OF_IMMUNE_RESPONSE	135	0.582182	2.00367	2.64265e-07	1.01193e-05	8.11584e-06	1753	tags=31%, list=9%, signal=28%	PTPRC/PTPN22/CD96/IL13RA2/CD74/FCGR2B/FCRL3/SASH3/LAPTM5/JAK3/IRAK3/CLEC7A/CCR2/HK1/PGC/CD226/TNFRSF1B/GPRC5B/APOA1/HLA-F/IL33/HLA-E/BTK/IL1B/CD22/HMOX1/CD244/MALT1/TLR4/BST2/IL4R/GATA3/CD40/HLA-A/CD40LG/CD28/CD81/XBP1/HPX/STX4/LILRB1/NOD2
GOBP_LEUKOCYTE_HOMEOSTASIS	GOBP_LEUKOCYTE_HOMEOSTASIS	78	0.666612	2.14276	2.68484e-07	1.02211e-05	8.19748e-06	1162	tags=33%, list=6%, signal=31%	CORO1A/GPR174/DOCK11/CD74/JAK3/TNFSF13B/ANXA1/FAS/DOCK10/GPR183/GAPT/PIK3CD/PDE4B/LYN/BCL2/ITPKB/AKT1/TNFAIP3/NCKAP1L/MEF2C/TNFRSF17/TNFSF14/LGALS9/FLT3/SIT1/TSC22D3
GOBP_REGULATION_OF_PEPTIDASE_ACTIVITY	GOBP_REGULATION_OF_PEPTIDASE_ACTIVITY	409	0.439316	1.68435	3.08358e-07	1.16713e-05	9.3605e-06	2648	tags=30%, list=14%, signal=27%	S100A8/FYN/LXN/MMP9/RARRES1/CASP1/SPOCK2/CARD16/ATP2A3/CD44/LAPTM5/SERPINA12/PZP/CLEC7A/FAS/TNFSF10/PSMB9/LCK/SYK/FABP1/TNFAIP8/HGF/LYN/SERPINA7/AIM2/SPP2/SERPINA11/GSN/MEFV/TIMP1/RPS6KA1/LAMP3/SERPINB9/IFI16/KLF4/AKT1/PSMB8/ARL6IP5/BIRC3/SERPINA6/NLRP1/SERPINB8/SERPINF2/PAPLN/CIDEB/AQP1/CST3/CD27/CASP8/NGFR/VTN/MALT1/NLRP12/TNFSF14/SERPINA3/CFLAR/CARD8/BST2/LGALS9/ARRB2/LGMN/TIMP2/SPINT2/IGBP1/J…
GOMF_CARBOHYDRATE_BINDING	GOMF_CARBOHYDRATE_BINDING	229	0.501159	1.83103	3.18422e-07	1.19829e-05	9.61044e-06	2238	tags=28%, list=12%, signal=25%	FCN1/KLRK1/SELL/CD69/KLRB1/CLEC2D/LGALS2/LY75/CLEC2B/COLEC10/HLA-DRB1/CLEC7A/FBP1/KLRF1/KLRD1/KLRG1/CLEC4A/HK1/VCAN/FCN3/GALNT7/HLA-DRA/MAN2B1/CLEC4E/COLEC11/PPP1R3B/CLEC4G/CD22/ALDOB/PTX3/VTN/APCS/LGALS3/SIGLEC1/CALR/LGALS9/KLRC1/NPTX2/HKDC1/CD302/SELP/CLEC4M/PFKP/HK3/CLEC9A/ENG/LGALS1/CLEC14A/ALDOA/PPP1R3G/CLEC6A/CLEC4D/CD207/ALPK1/CD33/PRG2/PRPS2/ITLN1/MLEC/GCK/SIGLEC14/CD72/SIGLEC5
GOBP_THYMIC_T_CELL_SELECTION	GOBP_THYMIC_T_CELL_SELECTION	22	0.872737	2.19622	3.41609e-07	1.2782e-05	1.02514e-05	1581	tags=55%, list=8%, signal=50%	PTPRC/CD3D/CD3G/CCR7/CD3E/CD74/DOCK2/ITPKB/ZAP70/GATA3/CD28/PTPN2
GOBP_POSITIVE_REGULATION_OF_INTERLEUKIN_2_PRODUCTION	GOBP_POSITIVE_REGULATION_OF_INTERLEUKIN_2_PRODUCTION	30	0.822762	2.19869	3.45763e-07	1.28639e-05	1.0317e-05	1520	tags=57%, list=8%, signal=52%	PTPRC/CD3E/CD4/SASH3/CLEC7A/CCR2/ANXA1/PDE4B/CD86/IRF4/CD83/IL1B/MALT1/PRKCQ/RIPK2/CD80/CD28
GOBP_POSITIVE_REGULATION_OF_LEUKOCYTE_MEDIATED_IMMUNITY	GOBP_POSITIVE_REGULATION_OF_LEUKOCYTE_MEDIATED_IMMUNITY	112	0.617426	2.09042	3.5022e-07	1.29562e-05	1.0391e-05	2783	tags=47%, list=15%, signal=41%	KLRK1/PTPRC/IL23A/ITGB2/SLAMF6/SASH3/HLA-DRB1/CLEC7A/KLRD1/ITGAM/CD226/RASGRP1/PTAFR/HLA-DRA/CD1C/SH2D1A/HLA-F/CD1A/HLA-E/HLA-B/BTK/IL1B/CD1B/CD1E/TYROBP/MALT1/IL12RB1/ZBTB1/NCR3/SH2D1B/GATA3/CD40/HLA-A/STAP1/CD28/CD81/HPX/STX4/NOD2/MR1/VAV1/HLA-H/B2M/TBX21/IL18RAP/CRTAM/C3/ARG1/IL18R1/AZGP1/EXOSC6/TNF/KIR2DL4
GOBP_MAINTENANCE_OF_LOCATION	GOBP_MAINTENANCE_OF_LOCATION	299	0.474409	1.76597	3.93621e-07	1.448e-05	1.16131e-05	2668	tags=29%, list=14%, signal=26%	CORO1A/S100A8/PTPRC/LCN2/CXCL9/CCR7/CXCL10/CD4/SRGN/SYNE1/CRP/HK1/LCK/PTPN6/LYN/TMSB10/GSN/TSPO/APOA1/MCOLN2/PTK2B/FLNA/CXCL11/AKT1/RASA3/CCR5/IL1B/NFKBIA/SLC8A1/CAPN3/APLNR/EHD1/GM2A/CLIC2/HTR2B/CHCHD10/CALR/ITPR1/SUN2/TTC39B/CX3CL1/APOC4/ACACB/PLN/DZIP1/ZC3H12A/ALKBH7/NFKB1/PTPN2/APOE/ALB/VPS13C/ANK2/PLIN5/TWF2/F2R/CCL19/ATP7B/TMSB4X/ATP1A2/NR1H3/DRD1/S100A9/CCL21/ANK3/FTL/PPARA/IKBKE/CALM1/PLI…
GOBP_MICROGLIAL_CELL_ACTIVATION	GOBP_MICROGLIAL_CELL_ACTIVATION	42	0.762522	2.20112	4.19717e-07	1.53537e-05	1.23138e-05	2460	tags=60%, list=13%, signal=52%	PTPRC/ITGB2/AIF1/ITGAM/TLR8/IL33/C1QA/C5AR1/ATM/TLR2/TYROBP/JAK2/LRRK2/CX3CL1/IFNG/STAP1/CST7/TLR7/GRN/SYT11/TLR1/CLU/TREM2/CCL3/APP
GOBP_REGULATION_OF_LYMPHOCYTE_MIGRATION	GOBP_REGULATION_OF_LYMPHOCYTE_MIGRATION	54	0.7207	2.1864	4.59023e-07	1.66982e-05	1.33922e-05	2460	tags=52%, list=13%, signal=45%	KLRK1/CCL5/ITGA4/DOCK8/CXCL10/CXCL12/CXCL14/CCL2/CCR2/AIF1/JAM2/SPN/PTK2B/PADI2/AKT1/MSN/STK10/CXCL13/LRCH1/CCL20/CD200/PYCARD/CCL21/RIPK3/CRK/TNFRSF14/CCL3/APP
GOBP_REGULATION_OF_MYELOID_CELL_DIFFERENTIATION	GOBP_REGULATION_OF_MYELOID_CELL_DIFFERENTIATION	201	0.516457	1.86549	4.95586e-07	1.79287e-05	1.4379e-05	3200	tags=35%, list=17%, signal=29%	EVI2B/IL23A/PRKCB/GPR171/RASSF2/CD74/CD4/HLA-DRB1/LEF1/ETS1/HCLS1/LYN/CCR1/C1QC/INPP5D/STAT1/PTK2B/ITPKB/GP1BA/MAFB/SPI1/FOS/ISG15/NCKAP1L/NFKBIA/MEF2C/TYROBP/CASP8/APCS/LGALS3/TLR4/NOTCH2/PRKCQ/LDB1/KLF13/CIB1/IFNG/GPR68/PTPN2/STAT3/GNAS/CSF3R/ATP6AP1/SFRP1/LILRB1/INHBA/LILRB3/B2M/RB1/PF4/TNRC6B/ZFP36/TREM2/CCL3/ACIN1/JUN/LILRB4/FBN1/SIN3A/TNF/IRF7/TGFB1/ZFP36L1/ZBTB46/TFE3/KAT2B/HMGB1/RIPK1/HOX…
GOBP_REGULATION_OF_DNA_BINDING_TRANSCRIPTION_FACTOR_ACTIVITY	GOBP_REGULATION_OF_DNA_BINDING_TRANSCRIPTION_FACTOR_ACTIVITY	406	0.436597	1.67056	4.99706e-07	1.79784e-05	1.44189e-05	3464	tags=34%, list=18%, signal=28%	S100A8/PRKCB/ITGB2/CX3CR1/S100A12/PRKCH/NLRC5/NLRC3/CARD16/HCK/IRAK3/HCLS1/TRIM22/SYK/AIM2/BEX1/MYD88/ICAM1/KLF4/FLNA/AKT1/PTGIS/ESR1/TNFAIP3/FOS/BTK/IL1B/NFKBIA/TLR2/TRAF1/CAPN3/HMOX1/TRIM31/MALT1/TLR4/NLRP12/CFLAR/CARD8/LGALS9/ARRB2/EOMES/IL1RAP/RELA/HAVCR2/JAK2/PRKCQ/RIPK2/CIB1/TRIM68/COMMD6/TRAF3/SIK1/CX3CL1/CD40/FANCA/PRMT2/HAND2/TRIM8/TRIM25/CD40LG/TNFSF18/ZC3H12A/SFRP5/NFKB1/CD200/CRTC3/ST…
GOBP_REGULATION_OF_CD4_POSITIVE_ALPHA_BETA_T_CELL_DIFFERENTIATION	GOBP_REGULATION_OF_CD4_POSITIVE_ALPHA_BETA_T_CELL_DIFFERENTIATION	51	0.724326	2.18258	5.03336e-07	1.80101e-05	1.44443e-05	1518	tags=43%, list=8%, signal=40%	IL23A/SASH3/JAK3/HLA-DRB1/ANXA1/RUNX3/CD86/IRF4/HLA-DRA/NFKBIZ/CD83/NCKAP1L/MALT1/LGALS9/IL12RB1/RIPK2/IL4R/GATA3/IFNG/TNFSF18/ZC3H12A/CD80
GOCC_T_CELL_RECEPTOR_COMPLEX	GOCC_T_CELL_RECEPTOR_COMPLEX	21	0.88485	2.21673	5.15159e-07	1.83329e-05	1.47033e-05	1053	tags=71%, list=6%, signal=68%	TRBC1/TRAT1/CD8A/CD3D/CD3G/SKAP1/CD3E/CD4/APBB1IP/SYK/PTPN6/CD247/TRGV5/ZAP70/CD8B
GOBP_NEGATIVE_REGULATION_OF_CELL_CELL_ADHESION	GOBP_NEGATIVE_REGULATION_OF_CELL_CELL_ADHESION	167	0.540476	1.90693	5.37466e-07	1.90234e-05	1.5257e-05	2749	tags=41%, list=14%, signal=35%	PTPN22/IDO1/FGL2/CD74/FCGR2B/CXCL12/LILRB2/LAPTM5/JAK3/HLA-DRB1/ANXA1/RUNX3/AKNA/PTPN6/CD86/SPN/PLA2G2D/CD300A/IRF1/APOA1/KLF4/AKT1/ASS1/GPNMB/FGL1/CLEC4G/CTLA4/PAG1/LGALS3/PRKCD/LGALS9/SPINT2/HAVCR2/JAK2/FXYD5/IL4R/IL1RN/LRRC32/PLG/PDCD1LG2/TNFSF18/ZC3H12A/BMP4/CD80/PTPN2/LAX1/IL2RA/LILRB1/PRNP/MDK/CCL21/PPARA/CCL25/TNFRSF14/CR1/TBX21/BMP6/MYADM/CRTAM/VSIG4/SH2B3/CBLB/ARG1/LILRB4/TRPV4/C1QTNF1/C…
GOCC_PHAGOCYTIC_VESICLE	GOCC_PHAGOCYTIC_VESICLE	130	0.581551	1.98422	5.54789e-07	1.95309e-05	1.56641e-05	2410	tags=37%, list=13%, signal=32%	RAC2/CORO1A/GNLY/CYBB/MPEG1/CTSS/CYBA/TAP1/SYK/HVCN1/VIM/GSN/NCF2/HLA-F/HLA-E/ATP6V0C/HLA-B/TLR2/HLA-C/RAB8B/RAB31/RAPGEF1/TAPBP/ATP6V0D1/CALR/FMNL1/TAP2/RAB20/HLA-A/ZYX/INPP5B/TLR7/RAB43/SLC11A1/STX4/SYT11/NOD2/TLR1/TRIM14/HLA-H/RAB14/B2M/RILP/ATP6V0B/RAB32/NCF4/STX8/ATP6V0A2
GOBP_CYTOLYSIS	GOBP_CYTOLYSIS	30	0.815339	2.17885	5.71004e-07	1.99943e-05	1.60357e-05	829	tags=37%, list=4%, signal=35%	GZMH/GZMA/PRF1/LYZ/C7/GZMB/C9/C8B/LBP/C8A/PLA2G2A
GOBP_WOUND_HEALING	GOBP_WOUND_HEALING	483	0.418408	1.62605	5.83179e-07	2.0312e-05	1.62905e-05	2779	tags=29%, list=15%, signal=26%	S100A8/PRKCB/IL24/FYN/DOCK8/PLEK/PRKCH/SAA1/LCP2/DGKA/GNG2/DOCK11/FCER1G/FERMT3/SMOC2/CD44/DCN/CLEC7A/ANXA1/ETS1/PDGFRA/CXCR4/LCK/SYK/F13A1/PIK3R5/PTPN6/LYN/HBB/GSN/IRF1/TIMP1/RAB27A/FGFR2/GP1BA/FLNA/TNFAIP3/ALOX5/F9/CLIC1/SERPINF2/HMOX1/FGA/ENTPD1/EHD1/ITGA9/VTN/HPSE/APCS/TLR4/PRKCD/ADRA2A/NOTCH2/CFLAR/RAP2B/PLAT/PRCP/ITPR1/ARRB2/VAV3/CORO1B/JAK2/PRKCQ/PLAUR/MICAL1/DGKE/SELP/GATA3/CD40/DUSP10/FG…
GOBP_MYELOID_LEUKOCYTE_DIFFERENTIATION	GOBP_MYELOID_LEUKOCYTE_DIFFERENTIATION	191	0.520505	1.86118	5.87745e-07	2.03627e-05	1.63312e-05	2991	tags=35%, list=16%, signal=30%	EVI2B/IL23A/CCR7/MMP9/RASSF2/CD74/CD4/MT1G/HLA-DRB1/LEF1/HCLS1/GPR183/PIK3CD/CSF1R/LYN/IRF4/CCR1/C1QC/INPP5D/IFI16/MAFB/SPI1/FOS/GAB3/TLR2/TYROBP/CASP8/APCS/TLR4/NOTCH2/JUNB/GATA3/IFNG/GPR68/BMP4/PTPN2/CD81/GNAS/ATP6AP1/SFRP1/LILRB1/INHBA/SRC/CCL19/LILRB3/RB1/PF4/LRRK1/IL15/TREM2/CCL3/KIT/ACIN1/JUN/APP/CBFA2T3/TCIRG1/RELB/LILRB4/FBN1/CEBPA/TNF/IRF7/TGFB1/ZFP36L1/ZBTB46/TFE3
GOCC_LUMENAL_SIDE_OF_MEMBRANE	GOCC_LUMENAL_SIDE_OF_MEMBRANE	32	0.807618	2.19702	6.0015e-07	2.0683e-05	1.65881e-05	1324	tags=50%, list=7%, signal=47%	HLA-DRB4/HLA-DRB5/CD74/HLA-DPA1/HLA-DRB1/HLA-DPB1/HLA-DQA1/HLA-DRA/HLA-F/HLA-E/HLA-B/HLA-DQB1/HLA-C/TAPBP/CALR/HLA-A
GOBP_REGULATION_OF_CHEMOTAXIS	GOBP_REGULATION_OF_CHEMOTAXIS	203	0.51595	1.86784	6.38212e-07	2.18796e-05	1.75477e-05	2014	tags=31%, list=11%, signal=28%	KLRK1/RAC2/CCL5/IL23A/BST1/CCR7/CXCL10/CD74/SLAMF8/CXCL12/SMOC2/CXCL14/CCL2/CCR2/PDGFRA/GPR183/AIF1/CXCR4/CSF1R/LYN/CCR1/TIAM1/MYCBP2/PTK2B/SEMA4D/C5AR1/PADI2/CCR4/C3AR1/IL16/PLA2G7/NCKAP1L/LBP/SEMA4A/GSTP1/CXCL13/PTN/BMPR2/MPP1/CALR/LGALS9/LGMN/DDT/CORO1B/CREB3/VEGFB/LPAR1/STAP1/MST1/TNFSF18/GPSM3/PTPN2/SUCNR1/DUSP1/STX4/NOD2/VEGFC/MDK/CCL19/TMSB4X/HRG/CCL21/S1PR1
GOBP_REGULATION_OF_COMPLEMENT_ACTIVATION	GOBP_REGULATION_OF_COMPLEMENT_ACTIVATION	52	0.727038	2.18431	6.44516e-07	2.19127e-05	1.75743e-05	2565	tags=56%, list=13%, signal=48%	IGLV1-44/C7/CFP/C9/C1QB/C1QC/CD5L/C1QA/C5AR1/C3AR1/C8B/IL1B/C8A/VTN/C1R/CR2/CFI/C2/CFB/C6/CD81/C4BPA/IGKC/C1S/CLU/CR1/SERPING1/VSIG4/C3
GOBP_REGULATION_OF_MYELOID_LEUKOCYTE_MEDIATED_IMMUNITY	GOBP_REGULATION_OF_MYELOID_LEUKOCYTE_MEDIATED_IMMUNITY	51	0.721258	2.17334	6.4587e-07	2.19127e-05	1.75743e-05	1366	tags=41%, list=7%, signal=38%	RAC2/ITGB2/IL13RA2/FCGR2B/FGR/DNASE1L3/CCR2/SYK/CD84/ITGAM/LYN/PTAFR/CD300A/HLA-E/BTK/HMOX1/TYROBP/PRAM1/LGALS9/IL4R/STAP1
GOBP_LYMPHOCYTE_APOPTOTIC_PROCESS	GOBP_LYMPHOCYTE_APOPTOTIC_PROCESS	70	0.67679	2.1246	6.50722e-07	2.19635e-05	1.7615e-05	1679	tags=30%, list=9%, signal=27%	IL7R/CCL5/CD3G/DOCK8/IDO1/CD74/JAK3/FAS/LYN/GIMAP8/AKT1/BTK/CD27/ST3GAL1/LGALS3/LGALS9/PRKCQ/TSC22D3/TP53/BMP4/IL2RA
GOBP_MAST_CELL_ACTIVATION	GOBP_MAST_CELL_ACTIVATION	56	0.712896	2.17512	6.64745e-07	2.23218e-05	1.79024e-05	1668	tags=36%, list=9%, signal=33%	RAC2/S100A12/LCP2/IL13RA2/FGR/RHOH/PTGDS/SYK/CD84/PIK3CD/CD226/LYN/CD300A/BTK/HMOX1/LGALS9/IL4R/CBL/PIK3CG/CNR1
GOCC_LUMENAL_SIDE_OF_ENDOPLASMIC_RETICULUM_MEMBRANE	GOCC_LUMENAL_SIDE_OF_ENDOPLASMIC_RETICULUM_MEMBRANE	26	0.839981	2.19678	6.68857e-07	2.23453e-05	1.79212e-05	1324	tags=62%, list=7%, signal=57%	HLA-DRB4/HLA-DRB5/CD74/HLA-DPA1/HLA-DRB1/HLA-DPB1/HLA-DQA1/HLA-DRA/HLA-F/HLA-E/HLA-B/HLA-DQB1/HLA-C/TAPBP/CALR/HLA-A
GOBP_FC_RECEPTOR_SIGNALING_PATHWAY	GOBP_FC_RECEPTOR_SIGNALING_PATHWAY	175	0.535032	1.89595	6.99676e-07	2.32562e-05	1.86518e-05	2505	tags=30%, list=13%, signal=26%	PTPRC/IGLV1-44/ITK/CD3G/FYN/LCP2/WIPF1/FCGR2B/FCER1G/FGR/HCK/FCGR3A/FCER1A/FCGR2A/PSMB9/SYK/LYN/PIGR/PSMB8/FOS/NCKAP1L/BTK/NFATC2/ARPC2/RAPGEF1/CD247/MALT1/PRKCD/WASF2/VAV3/RELA/PRKCQ/NFKB1/PSME1/PSME2/ELMO2/VAV1/SRC/IGKC/ARPC4/CALM1/TAB2/MYO1G/CRK/ACTR2/ACTB/ACTR3/KIT/NFATC3/JUN/PTPRJ/LIMK1
GOBP_RESPONSE_TO_TYPE_I_INTERFERON	GOBP_RESPONSE_TO_TYPE_I_INTERFERON	97	0.625879	2.08025	7.06744e-07	2.33725e-05	1.87451e-05	3286	tags=49%, list=17%, signal=41%	IFITM1/NLRC5/IRF8/PTPN6/SAMHD1/OAS2/IRF4/ISG20/IRF1/MYD88/STAT1/HLA-F/HLA-E/PSMB8/HLA-B/ISG15/GBP2/HLA-C/OASL/IRF9/BST2/XAF1/MX1/IFI27/MX2/HLA-A/IFNA21/STAT2/PTPN2/PTPN1/TYK2/IFITM3/HLA-H/IFITM2/IKBKE/SP100/OAS3/OAS1/IRF7/IRF3/IFNA8/IFI6/IFNAR2/IFI35/CNOT7/EGR1/IFIT2/IFNAR1
GOBP_NEGATIVE_REGULATION_OF_LYMPHOCYTE_MEDIATED_IMMUNITY	GOBP_NEGATIVE_REGULATION_OF_LYMPHOCYTE_MEDIATED_IMMUNITY	45	0.752171	2.20201	7.20163e-07	2.36966e-05	1.9005e-05	2783	tags=56%, list=15%, signal=48%	IL7R/PTPRC/CD96/FCGR2B/KLRD1/PTPN6/HLA-F/SERPINB9/HLA-E/HLA-B/CLEC4G/LGALS9/ARRB2/KLRC1/HAVCR2/HLA-A/LILRB1/NOD2/C4BPA/CRK/CR1/TBX21/ARG1/LILRB4/KIR2DL4
GOBP_REGULATION_OF_LYMPHOCYTE_APOPTOTIC_PROCESS	GOBP_REGULATION_OF_LYMPHOCYTE_APOPTOTIC_PROCESS	53	0.722436	2.188	7.35768e-07	2.4089e-05	1.93197e-05	1516	tags=34%, list=8%, signal=31%	IL7R/CCL5/CD3G/DOCK8/IDO1/CD74/JAK3/LYN/GIMAP8/BTK/CD27/ST3GAL1/LGALS3/LGALS9/PRKCQ/TSC22D3/TP53/BMP4
GOCC_ENDOCYTIC_VESICLE_MEMBRANE	GOCC_ENDOCYTIC_VESICLE_MEMBRANE	158	0.555699	1.9522	7.83842e-07	2.55353e-05	2.04796e-05	2673	tags=34%, list=14%, signal=30%	HLA-DRB4/RAC2/CORO1A/CYBB/HLA-DRB5/CD74/HLA-DPA1/HLA-DRB1/HLA-DPB1/CYBA/TAP1/HLA-DQA1/MARCO/HVCN1/HLA-DRA/HLA-F/HLA-E/ATP6V0C/HLA-B/TLR2/HLA-DQB1/HLA-C/RAB8B/RAB31/RAPGEF1/TAPBP/ATP6V0D1/AP2M1/CALR/STAB1/LRP1/TAP2/RAB20/HLA-A/INPP5B/RAB43/APOE/CD163/SLC11A1/STX4/CD207/TLR1/HLA-H/B2M/STAB2/RILP/ATP6V0B/RAB32/CAMK2D/ATP6V0A2/TYRP1/TCIRG1/AP2A2/UBC
GOBP_CELLULAR_EXTRAVASATION	GOBP_CELLULAR_EXTRAVASATION	67	0.689863	2.15987	7.90228e-07	2.56159e-05	2.05443e-05	2391	tags=48%, list=13%, signal=42%	SELL/ITGB2/CX3CR1/ITGA4/BST1/VCAM1/ITGAL/PTGER4/CXCL12/CCL2/CCR2/ITGB7/PIK3CD/JAM2/PTAFR/SPN/ICAM1/SELPLG/PECAM1/SELP/CX3CL1/CD99/PIK3CG/MDK/CCL21/TRIM55/RIPK3/SIRPA/CRK/CCL25/PLVAP/THY1
GOBP_MAINTENANCE_OF_LOCATION_IN_CELL	GOBP_MAINTENANCE_OF_LOCATION_IN_CELL	197	0.519084	1.86919	7.9615e-07	2.56461e-05	2.05685e-05	2391	tags=29%, list=13%, signal=26%	CORO1A/S100A8/PTPRC/LCN2/CXCL9/CCR7/CXCL10/CD4/SRGN/SYNE1/HK1/LCK/PTPN6/LYN/TMSB10/GSN/TSPO/MCOLN2/PTK2B/CXCL11/AKT1/RASA3/CCR5/SLC8A1/CAPN3/APLNR/CLIC2/HTR2B/CHCHD10/CALR/ITPR1/SUN2/CX3CL1/PLN/APOE/ALB/VPS13C/ANK2/TWF2/F2R/CCL19/ATP7B/TMSB4X/ATP1A2/DRD1/S100A9/CCL21/ANK3/FTL/CALM1/PDE4D/BDKRB1/SP100/CAMK2D/CALM3/TAPT1/CCL3/THY1
GOBP_METAL_ION_TRANSPORT	GOBP_METAL_ION_TRANSPORT	447	0.421764	1.63177	7.98991e-07	2.56461e-05	2.05685e-05	2425	tags=21%, list=13%, signal=18%	CORO1A/PTPRC/CCL5/MS4A1/PRKCB/CXCL9/FYN/CCR7/CXCL10/CD4/FCRL3/CXCL12/FGF14/ATP2A3/LILRB2/CCL2/CACNA2D3/CXCR4/LCK/CD84/PTPN6/PDE4B/TMEM163/GEM/LYN/CCR1/TSPO/GPM6A/MCOLN2/BCL2/CYSLTR1/PTK2B/FXYD1/ICAM1/CXCL11/RASA3/CCR5/IL16/LILRA2/GNAI2/NIPAL1/SLC8A1/CAPN3/SLC24A4/RAMP3/SLC39A14/APLNR/CLIC2/HTR2B/LGALS3/TRPV2/ADRA2A/ITPR1/ARRB2/STIM2/ATP2B4/CX3CL1/P2RX7/PLN/CCL8/P2RX1/GNAO1/PIK3CG/SLC11A1/LILRB1/P…
GOBP_REGULATION_OF_LEUKOCYTE_DEGRANULATION	GOBP_REGULATION_OF_LEUKOCYTE_DEGRANULATION	42	0.755007	2.17943	8.07491e-07	2.57925e-05	2.06859e-05	1276	tags=40%, list=7%, signal=38%	RAC2/ITGB2/IL13RA2/FCGR2B/FGR/CCR2/SYK/CD84/ITGAM/LYN/PTAFR/CD300A/HLA-F/HMOX1/PRAM1/LGALS9/IL4R
GOBP_REGULATION_OF_ALPHA_BETA_T_CELL_DIFFERENTIATION	GOBP_REGULATION_OF_ALPHA_BETA_T_CELL_DIFFERENTIATION	67	0.689035	2.15728	8.16136e-07	2.5942e-05	2.08059e-05	1518	tags=39%, list=8%, signal=36%	IL23A/SASH3/JAK3/HLA-DRB1/ANXA1/RUNX3/SYK/PRDM1/CD86/IRF4/HLA-DRA/ITPKB/NFKBIZ/CD83/NCKAP1L/MALT1/ZAP70/LGALS9/IL12RB1/RIPK2/IL4R/GATA3/IFNG/TNFSF18/ZC3H12A/CD80
GOBP_CD4_POSITIVE_ALPHA_BETA_T_CELL_DIFFERENTIATION	GOBP_CD4_POSITIVE_ALPHA_BETA_T_CELL_DIFFERENTIATION	80	0.66046	2.12266	8.77857e-07	2.77691e-05	2.22712e-05	1641	tags=39%, list=9%, signal=36%	IL23A/SLAMF6/PTGER4/SASH3/JAK3/HLA-DRB1/LEF1/ANXA1/RUNX3/GPR183/CD86/IRF4/HLA-DRA/SPN/PLA2G2D/NFKBIZ/CD83/NCKAP1L/SEMA4A/MALT1/LY9/LGALS9/IL12RB1/RIPK2/IL4R/GATA3/IFNG/TNFSF18/ZC3H12A/CD80/STAT3
GOBP_REGULATION_OF_NATURAL_KILLER_CELL_MEDIATED_IMMUNITY	GOBP_REGULATION_OF_NATURAL_KILLER_CELL_MEDIATED_IMMUNITY	46	0.738339	2.17369	8.82688e-07	2.77877e-05	2.22861e-05	1822	tags=43%, list=10%, signal=39%	KLRK1/CD96/SLAMF6/KLRD1/CD226/RASGRP1/SH2D1A/HLA-F/SERPINB9/HLA-E/HLA-B/LGALS9/ARRB2/KLRC1/HAVCR2/NCR3/SH2D1B/HLA-A/LILRB1/VAV1
GOBP_T_CELL_APOPTOTIC_PROCESS	GOBP_T_CELL_APOPTOTIC_PROCESS	48	0.736067	2.20563	9.15033e-07	2.86681e-05	2.29922e-05	1679	tags=35%, list=9%, signal=32%	IL7R/CCL5/DOCK8/IDO1/JAK3/FAS/GIMAP8/AKT1/CD27/ST3GAL1/LGALS3/LGALS9/PRKCQ/TSC22D3/TP53/BMP4/IL2RA
GOBP_POSITIVE_REGULATION_OF_NF_KAPPAB_TRANSCRIPTION_FACTOR_ACTIVITY	GOBP_POSITIVE_REGULATION_OF_NF_KAPPAB_TRANSCRIPTION_FACTOR_ACTIVITY	155	0.557827	1.94935	9.40276e-07	2.92196e-05	2.34345e-05	3430	tags=44%, list=18%, signal=36%	S100A8/PRKCB/ITGB2/CX3CR1/S100A12/PRKCH/CARD16/IRAK3/TRIM22/AIM2/MYD88/ICAM1/BTK/IL1B/TLR2/TRAF1/CAPN3/MALT1/TLR4/CFLAR/LGALS9/IL1RAP/RELA/PRKCQ/RIPK2/CIB1/TRIM68/CX3CL1/CD40/TRIM8/TRIM25/CD40LG/TNFSF18/NFKB1/STAT3/TRADD/TERF2IP/TRIM38/NOD2/PYCARD/TRIM14/RBCK1/S100A9/CLU/RIPK3/TAB2/IL18RAP/RPS6KA5/APP/ARHGEF2/NFKB2/AR/UBC/TRIM21/IL18R1/NLRC4/TNF/UBA52/BCL10/AGER/RPS3/UBB/RIPK1/SLCO3A1/ROR1/ADAM8/…
GOBP_REGULATION_OF_PHAGOCYTOSIS	GOBP_REGULATION_OF_PHAGOCYTOSIS	86	0.650891	2.1051	9.42183e-07	2.92196e-05	2.34345e-05	2779	tags=50%, list=15%, signal=43%	PTPRC/IL2RB/IL2RG/FCGR2B/FCER1G/FGR/HCK/DOCK2/CCL2/CYBA/CLEC7A/SYK/CD300A/RAB27A/APOA1/NCKAP1L/IL1B/TLR2/SIRPG/RAB31/RAPGEF1/SIRPB1/PTX3/CALR/LRP1/C2/IFNG/STAP1/SLC11A1/SYT11/NOD2/PYCARD/LYAR/SIRPA/PLSCR1/IL15/TREM2/PTPRJ/C3/CSK/IL15RA/AHSG/TNF
GOMF_C_C_CHEMOKINE_BINDING	GOMF_C_C_CHEMOKINE_BINDING	20	0.87616	2.17063	9.46021e-07	2.92196e-05	2.34345e-05	890	tags=45%, list=5%, signal=43%	CX3CR1/CCR7/CXCR6/CCR2/CXCR4/CCR1/CCR4/CCR5/CCRL2
GOBP_MACROPHAGE_MIGRATION	GOBP_MACROPHAGE_MIGRATION	50	0.725764	2.17451	1.08783e-06	3.34419e-05	2.68208e-05	2947	tags=58%, list=15%, signal=49%	CCL5/CX3CR1/SAA1/SLAMF8/CCL2/CCR2/CSF1R/MCOLN2/PTK2B/C5AR1/C3AR1/LGALS3/DDT/CX3CL1/STAP1/MST1/TNFSF18/CD200/CD81/MDK/TRIM55/TREM2/CCL3/P2RY12/MIF/MAPK3/RARRES2/CXCL17/CMKLR1
GOBP_CD4_POSITIVE_ALPHA_BETA_T_CELL_ACTIVATION	GOBP_CD4_POSITIVE_ALPHA_BETA_T_CELL_ACTIVATION	94	0.628307	2.07103	1.09777e-06	3.35897e-05	2.69394e-05	1641	tags=35%, list=9%, signal=32%	IL23A/SLAMF6/PTGER4/SASH3/JAK3/HLA-DRB1/LEF1/ANXA1/RUNX3/GPR183/CD86/IRF4/HLA-DRA/SPN/PLA2G2D/NFKBIZ/CD83/NCKAP1L/SEMA4A/MALT1/LY9/LGALS9/IL12RB1/PRKCQ/RIPK2/IL4R/GATA3/IFNG/TNFSF18/ZC3H12A/CD80/CD81/STAT3
GOBP_POSITIVE_REGULATION_OF_ADAPTIVE_IMMUNE_RESPONSE	GOBP_POSITIVE_REGULATION_OF_ADAPTIVE_IMMUNE_RESPONSE	93	0.620921	2.04228	1.10449e-06	3.36382e-05	2.69782e-05	2004	tags=40%, list=11%, signal=36%	PTPRC/IL23A/SKAP1/CD4/SASH3/TNFSF13B/HLA-DRB1/CCR2/CD226/HLA-DRA/CD1C/HLA-F/NFKBIZ/CD1A/HLA-E/HLA-B/BTK/IL1B/CD1B/CD1E/MALT1/IL12RB1/ZBTB1/PRKCQ/RIPK2/GATA3/CD40/HLA-A/CD28/CD81/HPX/SLC11A1/NOD2/PYCARD/MR1/HLA-H/B2M
GOMF_CYTOKINE_BINDING	GOMF_CYTOKINE_BINDING	128	0.578644	1.96864	1.18903e-06	3.60452e-05	2.89087e-05	2434	tags=33%, list=13%, signal=29%	IL2RB/CX3CR1/ITGA4/IL2RG/CCR7/IL13RA2/CD74/CD4/IL10RA/CXCR6/CCR2/GBP1/CXCR4/CSF1R/LIFR/CCR1/TMC8/TNFRSF1B/TNFRSF9/CCR4/CCR5/PLP2/CCRL2/BMPR2/IL12RB1/TGFBR3/IL3RA/IL1RN/LRRC32/ENG/IL2RA/CSF3R/GHR/IL12RB2/CHRD/TGFB3/TNFRSF14/IL1RL1/ZFP36/VASN/ACVRL1/KIT
GOBP_ANTIGEN_PROCESSING_AND_PRESENTATION_OF_PEPTIDE_ANTIGEN	GOBP_ANTIGEN_PROCESSING_AND_PRESENTATION_OF_PEPTIDE_ANTIGEN	185	0.517143	1.84027	1.2418e-06	3.74713e-05	3.00525e-05	2409	tags=31%, list=13%, signal=27%	HLA-DRB4/CYBB/HLA-DMB/HLA-DRB5/CD74/FCGR2B/FCER1G/CTSS/HLA-DPA1/HLA-DMA/HLA-DOA/HLA-DRB1/AP1S2/HLA-DPB1/CYBA/HLA-DOB/TAP1/IFI30/CLEC4A/PSMB9/HLA-DQA1/ERAP2/HLA-DRA/NCF2/HLA-F/HLA-E/PSMB8/HLA-B/HLA-DQB1/HLA-C/TAPBP/AP2M1/CALR/DYNC1I1/DYNLL1/LGMN/TAP2/HLA-A/CLEC4M/CAPZB/PSME1/PSME2/SLC11A1/DCTN3/CD207/PYCARD/MR1/HLA-H/ACTR1B/B2M/KIF4A/RILP/KIF22/KLC1/NCF4/TREM2/LNPEP
GOBP_T_CELL_DIFFERENTIATION_INVOLVED_IN_IMMUNE_RESPONSE	GOBP_T_CELL_DIFFERENTIATION_INVOLVED_IN_IMMUNE_RESPONSE	72	0.667022	2.11119	1.28532e-06	3.86069e-05	3.09632e-05	1641	tags=42%, list=9%, signal=38%	IL23A/FGL2/SLAMF6/PTGER4/FCER1G/JAK3/HLA-DRB1/LEF1/ANXA1/GPR183/CD86/IRF4/HLA-DRA/SPN/NFKBIZ/SEMA4A/MALT1/LY9/LGALS9/EOMES/IL12RB1/RIPK2/IL4R/GATA3/PCK1/IFNG/TNFSF18/ZC3H12A/CD80/STAT3
GOCC_IMMUNOGLOBULIN_COMPLEX	GOCC_IMMUNOGLOBULIN_COMPLEX	16	0.900619	2.09807	1.30648e-06	3.90632e-05	3.13292e-05	615	tags=44%, list=3%, signal=42%	TRBC1/IGHA1/IGHM/IGLV1-44/SYK/PIGR/CD79A
GOBP_SECOND_MESSENGER_MEDIATED_SIGNALING	GOBP_SECOND_MESSENGER_MEDIATED_SIGNALING	279	0.472026	1.74722	1.33457e-06	3.95548e-05	3.17235e-05	2524	tags=27%, list=13%, signal=23%	PTPRC/TRAT1/CX3CR1/TMEM100/PLEK/BST1/CCR7/CD3E/VCAM1/CD4/AVPR1A/CXCR6/CCR2/GBP1/CXCR4/SYK/PTGFR/CCR1/PPP3CC/DEFB1/PTK2B/FPR1/CCR4/CCR5/PPP1R9B/RCAN3/BTK/NFATC2/SLC8A1/CD22/CCRL2/APLNR/AQP1/CLIC2/HTR2B/ZAP70/RGS2/ITPR1/ATP2B4/CIB1/LRRK2/SELP/PDE7B/SLA2/LPAR1/P2RX7/PLN/CCL20/RCAN2/CRTC3/PRKAR2B/APOE/DYRK2/CAP1/PRNP/ANK2/KSR1/TBC1D10C/EIF4EBP2/ATP1A2/PDE2A/MCTP2/KDR/CALM1/PDE4D/CAMK2D/CALM3/TREM2/CC…
GOBP_POSITIVE_REGULATION_OF_B_CELL_PROLIFERATION	GOBP_POSITIVE_REGULATION_OF_B_CELL_PROLIFERATION	40	0.758291	2.17172	1.335e-06	3.95548e-05	3.17235e-05	1291	tags=40%, list=7%, signal=37%	PTPRC/CD38/BST1/CD74/FCRL3/SASH3/TNFSF13B/GPR183/BCL2/NCKAP1L/NFATC2/MEF2C/TLR4/IL7/VAV3/CD40
GOCC_HIGH_DENSITY_LIPOPROTEIN_PARTICLE	GOCC_HIGH_DENSITY_LIPOPROTEIN_PARTICLE	27	0.822491	2.17082	1.39448e-06	4.1131e-05	3.29876e-05	2172	tags=74%, list=11%, signal=66%	SAA1/SAA2/APOF/SAA4/APOA1/PLA2G7/LIPC/APOA5/LCAT/APOC4/CETP/HPR/APOC1/APOE/APOL1/APOM/APOC2/APOC3/CLU/PLTP
GOBP_SEQUESTERING_OF_CALCIUM_ION	GOBP_SEQUESTERING_OF_CALCIUM_ION	111	0.584944	1.97604	1.42334e-06	4.17939e-05	3.35193e-05	2391	tags=32%, list=13%, signal=29%	CORO1A/PTPRC/CXCL9/CCR7/CXCL10/LCK/PTPN6/LYN/MCOLN2/PTK2B/CXCL11/RASA3/CCR5/SLC8A1/CAPN3/APLNR/CLIC2/HTR2B/CALR/ITPR1/CX3CL1/PLN/ANK2/F2R/CCL19/ATP7B/ATP1A2/DRD1/CCL21/CALM1/PDE4D/BDKRB1/CAMK2D/CALM3/CCL3/THY1
GOMF_ATPASE_ACTIVITY	GOMF_ATPASE_ACTIVITY	436	-0.419842	-1.62257	1.44414e-06	4.22153e-05	3.38572e-05	3419	tags=32%, list=18%, signal=27%	SPATA5L1/RAD51C/DHX30/KIF9/WRNIP1/KIF27/ACSM4/PSMC3/DHX36/BTAF1/HSPA1B/ACSBG2/ASCC3/KATNA1/ABCC3/VPS4B/DNA2/RALBP1/DHX35/ABCB5/EIF4A2/DHX32/TRIP13/DDX41/MDN1/PMS1/DDX46/C10orf88/CHD6/DDX55/YME1L1/EIF4A3/DDX5/SMARCA4/ERCC6/ATP2B1/IFIH1/MCM7/SHPRH/RFC2/ATP11A/DDX21/ATP6V1H/MYH14/ATP6V1A/CHD7/DQX1/ATAD5/MYO1E/MYO1B/CHD1/DDX53/KIFC2/ATAD1/ABCC9/OLA1/RECQL/KATNAL2/ATRX/PEX6/PSMC5/DDX10/ABCF1/ABCC10/SM…
GOBP_LIPOPOLYSACCHARIDE_MEDIATED_SIGNALING_PATHWAY	GOBP_LIPOPOLYSACCHARIDE_MEDIATED_SIGNALING_PATHWAY	55	0.712791	2.17587	1.52504e-06	4.43821e-05	3.5595e-05	1286	tags=40%, list=7%, signal=37%	CCL5/PTPN22/LY86/CARD16/HCK/CCL2/LYN/PTAFR/MYD88/AKT1/TNFAIP3/LILRA2/LBP/IL1B/NFKBIA/CD14/TLR2/MALT1/TLR4/CARD8/RIPK2/CX3CL1
GOBP_POSITIVE_REGULATION_OF_T_CELL_MEDIATED_CYTOTOXICITY	GOBP_POSITIVE_REGULATION_OF_T_CELL_MEDIATED_CYTOTOXICITY	27	0.819609	2.16321	1.72361e-06	4.9939e-05	4.00517e-05	2004	tags=59%, list=11%, signal=53%	PTPRC/IL23A/HLA-DRB1/HLA-DRA/CD1C/HLA-F/CD1A/HLA-E/HLA-B/CD1B/CD1E/IL12RB1/HLA-A/MR1/HLA-H/B2M
GOCC_COLLAGEN_CONTAINING_EXTRACELLULAR_MATRIX	GOCC_COLLAGEN_CONTAINING_EXTRACELLULAR_MATRIX	402	0.431445	1.65274	1.73991e-06	5.01893e-05	4.02524e-05	2181	tags=28%, list=11%, signal=25%	FCN1/S100A8/FBLN5/S100A4/MMP9/FGL2/ADAMDEC1/SRPX/CTSS/EFEMP1/CXCL12/SMOC2/DCN/MFAP4/PZP/ANXA1/USH2A/CFP/F13A1/COL14A1/VCAN/FCN3/ORM2/C1QB/SDC3/LAMA2/SPP2/ABI3BP/C1QC/A1BG/CCDC80/TIMP1/LAMA3/ORM1/APOA1/SERPINB9/C1QA/FGFR2/ICAM1/CTSZ/LUM/FGL1/ANGPTL1/CPA3/F9/ANG/ELN/LTBP2/SERPINB8/EMILIN2/SERPINF2/DPT/PTN/FGA/HTRA1/NCAM1/VTN/APCS/INHBE/LGALS3/SERPINA3/AEBP1/CALR/IL7/LGALS9/COL6A1/TIMP2/PSAP/FBLN2/C…
GOBP_REGULATION_OF_PEPTIDYL_TYROSINE_PHOSPHORYLATION	GOBP_REGULATION_OF_PEPTIDYL_TYROSINE_PHOSPHORYLATION	241	0.48014	1.76398	1.79102e-06	5.14368e-05	4.1253e-05	2578	tags=31%, list=14%, signal=27%	PTPRC/CCL5/IL23A/IL24/ITGB2/FYN/BST1/CD3E/CD74/CD4/CD44/SAMSN1/CLEC7A/HCLS1/SYK/PTPN6/CSF1R/HGF/LYN/BANK1/CD300A/GPRC5B/IQGAP1/PTK2B/ICAM1/SEMA4D/PECAM1/NTRK2/VTN/PRKCD/ADRA2A/RAP2B/IL7/MVP/ARRB2/TNK2/FLT3/JAK2/RIPK2/CD40/TP53/IFNG/CBL/STAP1/TNFSF18/CD80/PTPN2/EREG/CD81/UNC119/STAT3/HPX/SOCS3/SFRP1/GHR/PRNP/NOD2/ADRA1A/PTPN1/SRC/LILRA5/HRG/LRRK1/TNFRSF14/IL15/TREM2/THY1/KIT/APP/BMP6/PTPRJ/ARHGEF2…
GOMF_CYTOKINE_RECEPTOR_BINDING	GOMF_CYTOKINE_RECEPTOR_BINDING	237	0.496157	1.82003	2.16767e-06	6.1982e-05	4.97104e-05	3360	tags=36%, list=18%, signal=30%	CCL5/IL23A/CXCL9/CXCL10/CXCL12/CXCL14/CCL2/TNFSF13B/CCL18/CCR2/TNFSF10/SYK/TNFSF8/LIFR/LTB/SIVA1/MYD88/STAT1/DEFB1/LRG1/IL33/CXCL11/CXCL2/IL1B/TRAF1/CXCL13/CCRL2/CASP8/TNFSF14/CFLAR/IL7/DDT/IL12RB1/IL1RAP/TGFBR3/JAK2/TRAF3/GATA3/IRAK4/CX3CL1/IL1RN/VEGFB/IFNG/STAP1/CD40LG/CCL8/CCL20/TNFSF18/IFNA21/ENG/TRADD/TNFSF12/PPBP/PYCARD/VEGFC/TYK2/CCL19/USP15/CCL21/TGFB3/PF4/FERMT2/CCL25/IL15/CCL3/CCL23/SH2…
GOBP_INTERLEUKIN_12_PRODUCTION	GOBP_INTERLEUKIN_12_PRODUCTION	59	0.696762	2.12591	2.20502e-06	6.27758e-05	5.0347e-05	1925	tags=53%, list=10%, signal=47%	IL23A/IDO1/CCR7/LAPTM5/JAK3/IRF8/IRAK3/CLEC7A/SYK/LTB/TLR8/IRF1/MEFV/HLA-B/IL16/TLR2/TLR4/LGALS9/ARRB2/RELA/RIPK2/CD40/IFNG/SLAMF1/CD40LG/NFKB1/LILRB1/NOD2/MDK/CCL19/LILRA5
GOBP_REGULATION_OF_T_CELL_APOPTOTIC_PROCESS	GOBP_REGULATION_OF_T_CELL_APOPTOTIC_PROCESS	33	0.784472	2.13558	2.21787e-06	6.28684e-05	5.04212e-05	1516	tags=42%, list=8%, signal=39%	IL7R/CCL5/DOCK8/IDO1/JAK3/GIMAP8/CD27/ST3GAL1/LGALS3/LGALS9/PRKCQ/TSC22D3/TP53/BMP4
GOBP_RECEPTOR_SIGNALING_PATHWAY_VIA_STAT	GOBP_RECEPTOR_SIGNALING_PATHWAY_VIA_STAT	155	0.54827	1.91595	2.37529e-06	6.70405e-05	5.37673e-05	1964	tags=25%, list=10%, signal=22%	IL7R/PTPRC/CCL5/IL23A/IL24/FYN/IL10RA/STAT4/CCL2/JAK3/CCR2/HCLS1/CSF1R/LYN/HAMP/CD300A/STAT1/PTK2B/AKR1B1/IL26/FLT3/JAK2/CRLF3/CD40/IFNG/STAT5A/TNFSF18/IFNA21/PIAS1/STAT2/PTPN2/STAT3/HPX/SOCS3/GHR/F2R/DOT1L/IL10RB
GOBP_REGULATION_OF_T_CELL_RECEPTOR_SIGNALING_PATHWAY	GOBP_REGULATION_OF_T_CELL_RECEPTOR_SIGNALING_PATHWAY	36	0.780333	2.16438	2.39818e-06	6.7396e-05	5.40524e-05	3242	tags=78%, list=17%, signal=65%	TRAT1/PTPN22/CCR7/LAPTM5/GBP1/LCK/PTPN6/CD226/CD300A/SH2D1A/MALT1/LGALS3/RELA/EZR/SLA2/PTPN2/CD81/PRNP/DGKZ/THY1/PTPRJ/ADA/CBLB/LILRB4/BCL10/RPS3/UBASH3A/KCNN4
GOMF_G_PROTEIN_COUPLED_CHEMOATTRACTANT_RECEPTOR_ACTIVITY	GOMF_G_PROTEIN_COUPLED_CHEMOATTRACTANT_RECEPTOR_ACTIVITY	23	0.849697	2.15795	2.52421e-06	7.05615e-05	5.65912e-05	890	tags=39%, list=5%, signal=37%	CX3CR1/CCR7/CXCR6/CCR2/CXCR4/CCR1/CCR4/CCR5/CCRL2
GOBP_NCRNA_PROCESSING	GOBP_NCRNA_PROCESSING	325	-0.446255	-1.68591	2.53237e-06	7.05615e-05	5.65912e-05	3992	tags=35%, list=21%, signal=28%	ADAT2/ZBTB8OS/TFB1M/LARP7/KTI12/FTSJ3/THUMPD2/TSEN15/HNRNPA2B1/GRSF1/LCMT2/ZNHIT3/CDK5RAP1/NSUN5/TRUB1/NSUN4/RRP8/METTL2A/GAR1/PTCD1/DKC1/PRKRA/CPSF4/CLP1/TRNT1/RPL7/ZNHIT6/EXOSC8/DIS3/WDR43/EXOSC9/CTU2/FAM98B/MDN1/MRPL1/EIF6/NOP2/OSGEPL1/EXOSC7/EIF4A3/NAT10/UTP6/TRIT1/DUS1L/RIOK3/NOP56/WDR55/DDX21/NOP58/RRP9/CHD7/USP36/METTL2B/NSUN5P2/INTS7/DDX10/RPUSD4/TYW3/RRP1B/PA2G4/TSEN2/NHP2/RPF2/TRMT12/EM…
GOBP_NEGATIVE_REGULATION_OF_LEUKOCYTE_APOPTOTIC_PROCESS	GOBP_NEGATIVE_REGULATION_OF_LEUKOCYTE_APOPTOTIC_PROCESS	45	0.738574	2.1622	2.62007e-06	7.26957e-05	5.83029e-05	1982	tags=42%, list=10%, signal=38%	IL7R/CCL5/DOCK8/IDO1/CCR7/CD74/CXCL12/JAK3/HCLS1/ITPKB/CD27/ST3GAL1/PRKCQ/TSC22D3/BMP4/LILRB1/NOD2/CCL19/CCL21
GOCC_CYTOPLASMIC_SIDE_OF_MEMBRANE	GOCC_CYTOPLASMIC_SIDE_OF_MEMBRANE	181	0.52503	1.86576	2.81993e-06	7.79111e-05	6.24857e-05	2469	tags=30%, list=13%, signal=26%	PTPRC/PTPN22/FYN/GNG2/CD2/FGR/HCK/LCK/SYK/GEM/LYN/SLA/TIAM1/IQGAP1/PTK2B/AKT1/RASA3/RGS1/PPP1R9B/GNAI2/KCNAB2/GNB4/CHMP4A/RPS26/TRAF1/GM2A/ZAP70/RGS2/RPS29/PTPN4/LITAF/TNK2/EZR/LRRK2/TRAF3/FARP1/GNG5/GNAO1/GNAS/EPB41/PTPN1/PLEKHA4/CYLD/RPS28/SRC/GNG11/GNA15/FERMT2/GNB1/GNA11/SHANK3/KIT/RASAL3/PGM5
GOBP_DEFENSE_RESPONSE_TO_FUNGUS	GOBP_DEFENSE_RESPONSE_TO_FUNGUS	33	0.780522	2.12483	2.86699e-06	7.88782e-05	6.32613e-05	2652	tags=30%, list=14%, signal=26%	S100A8/GNLY/S100A12/HAMP/COTL1/CLEC6A/HRG/S100A9/ARG1/RARRES2
GOBP_SUPEROXIDE_METABOLIC_PROCESS	GOBP_SUPEROXIDE_METABOLIC_PROCESS	61	0.683332	2.10238	3.07971e-06	8.43765e-05	6.7671e-05	995	tags=30%, list=5%, signal=28%	ITGB2/CYBB/BST1/FBLN5/CRP/CYBA/CLEC7A/SYK/NQO1/ITGAM/HVCN1/NCF2/GNAI2/PREX1/GSTP1/TYROBP/PRKCD/SOD2
GOBP_POSITIVE_REGULATION_OF_MONONUCLEAR_CELL_MIGRATION	GOBP_POSITIVE_REGULATION_OF_MONONUCLEAR_CELL_MIGRATION	60	0.677468	2.07856	3.36412e-06	9.17845e-05	7.36124e-05	1484	tags=37%, list=8%, signal=34%	CCL5/ITGA4/DOCK8/CCR7/CXCL10/CXCL12/CXCL14/CCR2/AIF1/JAM2/CCR1/SPN/PTK2B/PLA2G7/CXCL13/LGALS3/CALR/LGALS9/LGMN/CREB3/CCL20/TNFSF18
GOMF_MHC_PROTEIN_COMPLEX_BINDING	GOMF_MHC_PROTEIN_COMPLEX_BINDING	24	0.833943	2.14571	3.39461e-06	9.22321e-05	7.39713e-05	430	tags=50%, list=2%, signal=49%	CD8A/MS4A1/HLA-DMB/CD74/CD4/HLA-DMA/LILRB2/HLA-DOA/HLA-DRB1/HLA-DOB/KLRD1/HLA-DRA
GOBP_RESPONSE_TO_PEPTIDE	GOBP_RESPONSE_TO_PEPTIDE	479	0.406267	1.58101	3.47225e-06	9.39515e-05	7.53503e-05	2973	tags=29%, list=16%, signal=25%	PTPN22/PRKCB/FYN/ITGA4/CYBB/MMP9/BTG2/VCAM1/UCP2/FCGR2B/STAT4/CXCL12/JAK3/SERPINA12/ANXA1/TNFSF10/PIP4K2A/LYN/ACTN2/KLF2/VIM/PTPRE/TIMP1/STAT1/FABP3/IQGAP1/ADCY7/CRHBP/ICAM1/KLF4/AKR1B1/AKT1/CCND3/ATP6V0C/TNFAIP3/ASS1/MAX/PPP1R9B/ATP6V1B2/GNAI2/EGR2/IL1B/NFKBIA/NR4A2/TEK/GSTP1/ECHDC3/TLR2/RAB8B/NLRP1/RAB31/CPS1/RAMP3/SLC39A14/ATP6V0D1/NGFR/TLR4/PRKCD/CFLAR/LGMN/RELA/TGFBR3/JAK2/PRKCQ/RIPK2/KLF11/…
GOBP_RIBONUCLEOPROTEIN_COMPLEX_BIOGENESIS	GOBP_RIBONUCLEOPROTEIN_COMPLEX_BIOGENESIS	375	-0.430675	-1.64771	3.62242e-06	9.76114e-05	7.82856e-05	4247	tags=38%, list=22%, signal=30%	TXNL4A/ERAL1/EIF2A/LAS1L/UTP20/CPSF6/RPF1/SNRPG/MRPS7/NCBP1/SMN1/GEMIN5/TFB1M/FTSJ3/EIF2S3/LUC7L2/SNRPD1/EIF3B/ZNHIT3/NSUN5/NSUN4/RRP8/EIF3D/GAR1/CLNS1A/DKC1/RPS27L/DHX30/CLP1/RPL7/NUDT21/ZNHIT6/EXOSC8/DIS3/WDR43/EXOSC9/SMN2/NLE1/MDN1/MRPL1/ATR/MCTS1/PSIP1/EIF6/NOP2/EXOSC7/EIF4A3/CUL4A/NAT10/PTGES3/UTP6/SNRPC/GNL3L/RIOK3/EIF4H/VCX/NOP56/PUF60/WDR55/DDX21/NOP58/RRP9/SNRPE/EIF3E/CHD7/ZNF622/CELF1/W…
GOBP_POSITIVE_REGULATION_OF_PEPTIDYL_TYROSINE_PHOSPHORYLATION	GOBP_POSITIVE_REGULATION_OF_PEPTIDYL_TYROSINE_PHOSPHORYLATION	181	0.521513	1.85326	3.69637e-06	9.9196e-05	7.95565e-05	2575	tags=32%, list=14%, signal=28%	PTPRC/CCL5/IL23A/IL24/FYN/CD3E/CD74/CD4/CD44/CLEC7A/HCLS1/SYK/CSF1R/HGF/LYN/BANK1/GPRC5B/IQGAP1/PTK2B/ICAM1/SEMA4D/PECAM1/NTRK2/VTN/ADRA2A/ARRB2/TNK2/FLT3/JAK2/RIPK2/CD40/TP53/IFNG/STAP1/TNFSF18/CD80/EREG/CD81/UNC119/STAT3/HPX/SOCS3/GHR/PRNP/NOD2/ADRA1A/PTPN1/SRC/LILRA5/LRRK1/TNFRSF14/IL15/TREM2/KIT/BMP6/PTPRJ/ARHGEF2/MIF
GOCC_SPECIFIC_GRANULE	GOCC_SPECIFIC_GRANULE	151	0.54483	1.89898	3.75143e-06	0.000100263	8.0412e-05	1854	tags=29%, list=10%, signal=27%	LCN2/ITGB2/LYZ/CD53/CYBB/CHIT1/BST1/ITGAL/DOCK2/CYBA/CFP/PTPN6/ITGAM/HVCN1/ORM2/TNFRSF1B/RAB27A/ORM1/LRG1/CNN2/C3AR1/CTSZ/LAIR1/KCNAB2/STK10/PTX3/HPSE/SLCO4C1/SLC44A2/RAP2B/VAMP1/HP/TIMP2/PLAUR/P2RX1/NFKB1/HMOX2/RAB37/ATP8A1/STX4/STOM/CLEC4D/FCAR/CD33
GOBP_NEGATIVE_REGULATION_OF_INTRACELLULAR_SIGNAL_TRANSDUCTION	GOBP_NEGATIVE_REGULATION_OF_INTRACELLULAR_SIGNAL_TRANSDUCTION	442	0.415843	1.6057	4.10045e-06	0.000109145	8.75359e-05	2659	tags=27%, list=14%, signal=24%	PTPRC/PTPN22/C1QTNF3/PLEK/MMP9/RASSF2/CD74/NLRC3/RHOH/CXCL12/CD44/ARHGAP25/DUSP2/IRAK3/FBP1/GBP1/PTPN6/LYN/PIK3IP1/BANK1/CD300A/STAT1/BCL2/KLF4/AKT1/UCHL1/RASA3/ESR1/TNFAIP3/IL1B/ATM/GSTP1/CD22/RAPGEF1/APLNR/DUSP7/CASP8/TLR4/PRKCD/NLRP12/RGS2/SOD2/NDRG2/CARD8/LITAF/ITPR1/ARRB2/TIMP2/RELA/IGBP1/PPP2R5C/EZR/PLAUR/ATP2B4/CIB1/LRRK2/SH3BP1/TRIM59/CREB3/DUSP10/CDKN2D/SLA2/LPAR1/P2RX7/HIPK3/RNF125/ZC3H…
GOBP_NEGATIVE_REGULATION_OF_LEUKOCYTE_PROLIFERATION	GOBP_NEGATIVE_REGULATION_OF_LEUKOCYTE_PROLIFERATION	81	0.63414	2.03738	4.15758e-06	0.000110218	8.83963e-05	2659	tags=51%, list=14%, signal=44%	MNDA/IDO1/FCGR2B/LILRB2/LST1/CRP/HLA-DRB1/PTPN6/CD86/LYN/SPN/PLA2G2D/CD300A/INPP5D/IL33/TNFAIP3/BTK/GPNMB/ATM/GSTP1/CLEC4G/CTLA4/TYROBP/LGALS9/HAVCR2/LRRC32/CCL8/PDCD1LG2/BMP4/CD80/IL2RA/LILRB1/PRNP/TNFRSF13B/TNFRSF14/CR1/CRTAM/VSIG4/CBLB/ARG1/LILRB4
GOBP_POSITIVE_REGULATION_OF_LEUKOCYTE_CHEMOTAXIS	GOBP_POSITIVE_REGULATION_OF_LEUKOCYTE_CHEMOTAXIS	84	0.626878	2.0169	4.18921e-06	0.000110609	8.87094e-05	1982	tags=37%, list=10%, signal=33%	RAC2/CCL5/IL23A/CCR7/CXCL10/CD74/CXCL12/CXCL14/CCR2/AIF1/CSF1R/CCR1/PTK2B/C5AR1/C3AR1/PLA2G7/NCKAP1L/LBP/CXCL13/PTN/CALR/LGALS9/LGMN/CREB3/VEGFB/TNFSF18/GPSM3/VEGFC/MDK/CCL19/CCL21
GOBP_POSITIVE_REGULATION_OF_CYSTEINE_TYPE_ENDOPEPTIDASE_ACTIVITY	GOBP_POSITIVE_REGULATION_OF_CYSTEINE_TYPE_ENDOPEPTIDASE_ACTIVITY	142	0.545945	1.89015	4.30361e-06	0.000113173	9.07662e-05	3317	tags=40%, list=17%, signal=33%	S100A8/FYN/CASP1/ATP2A3/LAPTM5/CLEC7A/FAS/TNFSF10/LCK/SYK/AIM2/GSN/MEFV/IFI16/ARL6IP5/NLRP1/CIDEB/CASP8/NGFR/MALT1/NLRP12/CFLAR/CARD8/LGALS9/LGMN/JAK2/DAPK1/RIPK2/CASP10/BOK/P2RX1/DLC1/PMAIP1/ANP32B/TRADD/PYCARD/F2R/ARRB1/S100A9/CTSH/COL4A3/SLC1A1/MAP3K5/DAP/REST/NLRC4/PPM1F/TNF/BCL10/HSF1/TNFRSF10B/RPS3/HMGB1/RIPK1/NLRP2/BAK1/SMAD3
GOBP_POSITIVE_REGULATION_OF_GTPASE_ACTIVITY	GOBP_POSITIVE_REGULATION_OF_GTPASE_ACTIVITY	366	0.432773	1.6406	4.35951e-06	0.000114184	9.15772e-05	2489	tags=25%, list=13%, signal=22%	CCL5/ARHGAP15/ARHGDIB/GPR65/ARHGAP30/DOCK8/TAGAP/CCR7/ARHGEF6/DOCK11/ARHGAP9/DOCK2/ACAP1/ARHGAP25/RGS10/CCL2/CCL18/DOCK10/RASGRP1/RGS18/TIAM1/DEPDC1/RASGRF1/IQGAP1/ARAP2/PTK2B/ICAM1/SMAP2/RANBP3L/SEMA4D/ABR/RASGRP2/RASA3/RGS1/NCKAP1L/PREX1/RHOG/CXCL13/RAPGEF1/RABGAP1L/FAM13A/HTR2B/ARAP1/RGS2/RAP1GAP2/VAV3/ARHGEF1/TBC1D9/LRRK2/ELMOD3/SH3BP1/CX3CL1/CD40/GMIP/AKT2/ARHGAP4/CCL8/CCL20/DLC1/GNAO1/RABEP…
GOBP_REGULATION_OF_CALCIUM_ION_TRANSPORT_INTO_CYTOSOL	GOBP_REGULATION_OF_CALCIUM_ION_TRANSPORT_INTO_CYTOSOL	90	0.610788	2.00333	4.45916e-06	0.000116329	9.32974e-05	2391	tags=32%, list=13%, signal=28%	CORO1A/CXCL9/FYN/CXCL10/CD4/PTPN6/LYN/BCL2/PTK2B/CXCL11/SLC8A1/CAPN3/RAMP3/APLNR/CLIC2/CX3CL1/P2RX7/PLN/PRNP/ANK2/F2R/ATP1A2/DRD1/CALM1/PDE4D/BDKRB1/CAMK2D/CALM3/THY1
GOBP_SUPEROXIDE_ANION_GENERATION	GOBP_SUPEROXIDE_ANION_GENERATION	33	0.77494	2.10963	4.53012e-06	0.000117641	9.43494e-05	982	tags=39%, list=5%, signal=37%	ITGB2/CYBB/CRP/CYBA/CLEC7A/SYK/ITGAM/HVCN1/NCF2/GNAI2/GSTP1/TYROBP/PRKCD
GOBP_NCRNA_METABOLIC_PROCESS	GOBP_NCRNA_METABOLIC_PROCESS	395	-0.421551	-1.61426	4.54538e-06	0.000117641	9.43494e-05	4084	tags=35%, list=21%, signal=28%	RPF1/AARS2/DALRD3/ADAT2/ZBTB8OS/TFB1M/LARP7/KTI12/FTSJ3/THUMPD2/TSEN15/QRSL1/HNRNPA2B1/GRSF1/LCMT2/ZNHIT3/CDK5RAP1/NSUN5/TRUB1/NSUN4/RRP8/METTL2A/GAR1/PTCD1/DKC1/PRKRA/CPSF4/CLP1/TRNT1/RPL7/ZNHIT6/EXOSC8/AARSD1/DIS3/WDR43/EXOSC9/CTU2/FAM98B/MDN1/MRPL1/EIF6/NOP2/OSGEPL1/EXOSC7/EIF4A3/NAT10/YARS2/UTP6/TRIT1/MARS2/DUS1L/RIOK3/NOP56/WDR55/DDX21/NOP58/RRP9/CHD7/PSTK/USP36/METTL2B/NSUN5P2/INTS7/DDX10/R…
GOBP_NEGATIVE_REGULATION_OF_HYDROLASE_ACTIVITY	GOBP_NEGATIVE_REGULATION_OF_HYDROLASE_ACTIVITY	397	0.422407	1.61853	4.62754e-06	0.000119296	9.56767e-05	1974	tags=24%, list=10%, signal=22%	KLRK1/GZMA/LXN/MMP9/RARRES1/SPOCK2/CARD16/RHOH/CD44/SERPINA12/PZP/ANXA1/FABP1/TNFAIP8/HGF/SERPINA7/SPP2/SERPINA11/TIMP1/APOA1/IQGAP1/RPS6KA1/LAMP3/SERPINB9/IFI16/KLF4/SEMA4D/AKT1/PPP1R9B/NCKAP1L/GNAI2/CDC42SE1/SERPINA6/SERPINB8/SERPINF2/PAPLN/PTN/SLC39A14/AQP1/CST3/PTX3/CD27/NGFR/VTN/APCS/LGALS3/RGS2/TNFSF14/GCHFR/SERPINA3/CARD8/BST2/ARRB2/TNK2/PPP1R15A/TIMP2/SPINT2/IGBP1/PLAUR/MICAL1/LRRK2/ITIH4…
GOBP_POSITIVE_REGULATION_OF_INTERLEUKIN_8_PRODUCTION	GOBP_POSITIVE_REGULATION_OF_INTERLEUKIN_8_PRODUCTION	56	0.683723	2.08611	4.76219e-06	0.000122285	9.80745e-05	1907	tags=39%, list=10%, signal=35%	FCN1/CD74/CD2/CLEC7A/SYK/TLR8/MYD88/LBP/IL1B/CD14/TLR2/CD244/TLR4/LGALS9/IL17D/RELA/TLR7/STAT3/NOD2/TLR1/PYCARD/F2R
GOBP_REGULATION_OF_GTPASE_ACTIVITY	GOBP_REGULATION_OF_GTPASE_ACTIVITY	438	0.414304	1.59973	4.82889e-06	0.000123514	9.90597e-05	2494	tags=24%, list=13%, signal=21%	KLRK1/CCL5/ARHGAP15/ARHGDIB/GPR65/ARHGAP30/DOCK8/TAGAP/CCR7/ARHGEF6/DOCK11/ARHGAP9/RHOH/DOCK2/ACAP1/ARHGAP25/RGS10/CCL2/CCL18/DOCK10/EPHA3/RASGRP1/RGS18/TIAM1/DEPDC1/RASGRF1/IQGAP1/ARAP2/PTK2B/ICAM1/SMAP2/RANBP3L/SEMA4D/ABR/RASGRP2/RASA3/RGS1/NCKAP1L/PREX1/NTRK2/CDC42SE1/RHOG/CXCL13/RAPGEF1/RABGAP1L/FAM13A/HTR2B/ARAP1/RGS2/RAP1GAP2/ARRB2/VAV3/TNK2/ARHGEF1/TBC1D9/LRRK2/ELMOD3/SH3BP1/CX3CL1/CD40/GM…
GOBP_NEGATIVE_REGULATION_OF_LEUKOCYTE_MEDIATED_CYTOTOXICITY	GOBP_NEGATIVE_REGULATION_OF_LEUKOCYTE_MEDIATED_CYTOTOXICITY	22	0.84228	2.11957	4.94344e-06	0.000125952	0.000101015	1708	tags=64%, list=9%, signal=58%	IL7R/PTPRC/FCGR2B/KLRD1/HLA-F/SERPINB9/HLA-E/HLA-B/LGALS9/ARRB2/KLRC1/HAVCR2/HLA-A/LILRB1
GOBP_REGULATION_OF_CD4_POSITIVE_ALPHA_BETA_T_CELL_ACTIVATION	GOBP_REGULATION_OF_CD4_POSITIVE_ALPHA_BETA_T_CELL_ACTIVATION	62	0.676259	2.09124	5.25492e-06	0.000133369	0.000106964	1614	tags=39%, list=8%, signal=36%	IL23A/SASH3/JAK3/HLA-DRB1/ANXA1/RUNX3/CD86/IRF4/HLA-DRA/NFKBIZ/CD83/NCKAP1L/MALT1/LGALS9/IL12RB1/PRKCQ/RIPK2/IL4R/GATA3/IFNG/TNFSF18/ZC3H12A/CD80/CD81
GOBP_MATURE_B_CELL_DIFFERENTIATION	GOBP_MATURE_B_CELL_DIFFERENTIATION	31	0.781655	2.11579	5.29947e-06	0.00013398	0.000107454	2524	tags=61%, list=13%, signal=53%	ITM2A/POU2AF1/DOCK11/SLAMF8/FCGR2B/DOCK10/GPR183/PTK2B/PLCL2/ST3GAL1/MALT1/NOTCH2/MFNG/LGALS1/XBP1/CR1/CDH17/CMTM7/ADA
GOBP_LEUKOCYTE_ADHESION_TO_VASCULAR_ENDOTHELIAL_CELL	GOBP_LEUKOCYTE_ADHESION_TO_VASCULAR_ENDOTHELIAL_CELL	45	0.726796	2.12772	5.33864e-06	0.000134452	0.000107832	1252	tags=38%, list=7%, signal=35%	SELL/ITGB2/CX3CR1/ITGA4/VCAM1/CXCL12/ETS1/ITGB7/JAM2/PTAFR/SPN/ICAM1/KLF4/SELPLG/ALOX5/RELA/SELP
GOBP_ANTIMICROBIAL_HUMORAL_RESPONSE	GOBP_ANTIMICROBIAL_HUMORAL_RESPONSE	114	0.57792	1.9591	5.65811e-06	0.000141089	0.000113155	2158	tags=28%, list=11%, signal=25%	S100A8/IGHA1/IGHM/GNLY/LCN2/CXCL9/LYZ/S100A12/CXCL10/CXCL14/PGC/RNASE6/DEFB1/HLA-E/CXCL11/CXCL2/COLEC11/ANG/PLA2G2A/CXCL13/FGA/RPS19/HLA-A/FGB/SLC11A1/PPBP/NOD2/HRG/S100A9/CLU/ITLN1/PF4
GOCC_SECRETORY_GRANULE_MEMBRANE	GOCC_SECRETORY_GRANULE_MEMBRANE	283	0.463619	1.71141	5.66312e-06	0.000141089	0.000113155	2486	tags=33%, list=13%, signal=29%	SELL/PTPRC/ITGB2/CD53/CD38/CYBB/BST1/ITGAL/FCER1G/LILRB2/CD44/CYBA/FCGR2A/CD68/ITGAM/HVCN1/PTAFR/MOXD1/CD300A/TNFRSF1B/RAB27A/IQGAP1/LAMP3/FPR1/C5AR1/PIGR/ATP6V0C/HLA-B/C3AR1/NCKAP1L/LAIR1/PECAM1/KCNAB2/CD14/TLR2/HLA-C/RHOG/STK10/ITGAX/RAB31/SIRPB1/ATP11B/TYROBP/LGALS3/SLCO4C1/SLC44A2/RAP2B/VAMP1/PRCP/ITPR1/BST2/DYNLL1/BRI3/PLAUR/PSAP/SELP/NFASC/VAMP2/P2RX1/HMOX2/RAB37/ATP8A1/SLC11A1/STOM/VPS13C/…
GOCC_IMMUNOLOGICAL_SYNAPSE	GOCC_IMMUNOLOGICAL_SYNAPSE	38	0.752127	2.12231	5.66684e-06	0.000141089	0.000113155	1614	tags=53%, list=8%, signal=48%	CORO1A/GZMA/CD53/GZMB/SKAP1/CD3E/RHOH/HLA-DRB1/LCK/CD37/HLA-DRA/ICAM1/LGALS3/ZAP70/VAV3/HAVCR2/PRKCQ/EZR/CD28/CD81
GOBP_REGULATION_OF_CALCIUM_MEDIATED_SIGNALING	GOBP_REGULATION_OF_CALCIUM_MEDIATED_SIGNALING	62	0.673762	2.08352	6.12469e-06	0.000151911	0.000121834	2524	tags=37%, list=13%, signal=32%	TRAT1/TMEM100/PLEK/BST1/CD3E/CD4/GBP1/SYK/PTK2B/CD22/ZAP70/ITPR1/ATP2B4/CIB1/LRRK2/SLA2/DYRK2/PRNP/TBC1D10C/TREM2/CCL3/RGN/ADA
GOBP_NEGATIVE_REGULATION_OF_ANTIGEN_RECEPTOR_MEDIATED_SIGNALING_PATHWAY	GOBP_NEGATIVE_REGULATION_OF_ANTIGEN_RECEPTOR_MEDIATED_SIGNALING_PATHWAY	28	0.794731	2.10771	6.86483e-06	0.000169626	0.000136042	2659	tags=75%, list=14%, signal=65%	PTPN22/FCGR2B/FCRL3/LAPTM5/LPXN/GBP1/PTPN6/CD300A/SH2D1A/PLCL2/CD22/LGALS3/EZR/SLA2/PTPN2/PRNP/DGKZ/THY1/PTPRJ/CBLB/LILRB4
GOBP_POSITIVE_REGULATION_OF_CHEMOTAXIS	GOBP_POSITIVE_REGULATION_OF_CHEMOTAXIS	132	0.55302	1.89802	6.97597e-06	0.000171724	0.000137725	2099	tags=33%, list=11%, signal=29%	RAC2/CCL5/IL23A/CCR7/CXCL10/CD74/CXCL12/SMOC2/CXCL14/CCR2/AIF1/CXCR4/CSF1R/CCR1/TIAM1/PTK2B/C5AR1/CCR4/C3AR1/IL16/PLA2G7/NCKAP1L/LBP/CXCL13/PTN/BMPR2/CALR/LGALS9/LGMN/CREB3/VEGFB/LPAR1/TNFSF18/GPSM3/SUCNR1/STX4/VEGFC/MDK/CCL19/TMSB4X/CCL21/S1PR1/KDR
GOMF_PEPTIDE_ANTIGEN_BINDING	GOMF_PEPTIDE_ANTIGEN_BINDING	24	0.826031	2.12535	7.10266e-06	0.000174188	0.000139701	1334	tags=67%, list=7%, signal=62%	HLA-DRB5/HLA-DPA1/HLA-DRB1/HLA-DPB1/TAP1/HLA-DQA1/HLA-DRA/HLA-F/HLA-E/HLA-B/HLA-DQB1/HLA-C/TAPBP/TAP2/HLA-A/CLEC4M
GOBP_DEFENSE_RESPONSE_TO_GRAM_POSITIVE_BACTERIUM	GOBP_DEFENSE_RESPONSE_TO_GRAM_POSITIVE_BACTERIUM	78	0.620595	1.99484	7.97371e-06	0.00019482	0.000156248	1324	tags=27%, list=7%, signal=25%	IL7R/LYZ/MPEG1/FGR/GBP4/CRP/TNFSF8/RNASE6/MYD88/DEFB1/HLA-E/C5AR1/LBP/GBP2/TLR2/ANG/PLA2G2A/HAVCR2/RIPK2/GBP7/HLA-A
GOBP_LYMPHOCYTE_CHEMOTAXIS	GOBP_LYMPHOCYTE_CHEMOTAXIS	54	0.683868	2.07466	8.06121e-06	0.000196226	0.000157376	2387	tags=46%, list=13%, signal=41%	KLRK1/CCL5/CH25H/CXCL10/SAA1/CXCL14/CCL2/CCL18/CCR2/GPR183/PIK3CD/PTK2B/CXCL11/PADI2/CXCL13/CX3CL1/HSD3B7/CCL8/CCL20/PIK3CG/CCL19/CCL21/CCL25/CCL3/CCL23
GOBP_POSITIVE_REGULATION_OF_INTERLEUKIN_6_PRODUCTION	GOBP_POSITIVE_REGULATION_OF_INTERLEUKIN_6_PRODUCTION	80	0.633031	2.03451	8.09616e-06	0.000196347	0.000157473	1925	tags=41%, list=10%, signal=37%	POU2AF1/CD74/LILRB2/CYBA/CLEC7A/AIF1/SYK/IL17RA/PTAFR/TLR8/MYD88/IL33/IL16/LILRA2/LBP/IL1B/TLR2/TYROBP/TLR4/LGALS9/IL17D/IL1RAP/RIPK2/IFNG/EREG/TLR7/STAT3/XBP1/NOD2/TLR1/PYCARD/F2R/LILRA5
GOBP_REGULATION_OF_MYELOID_LEUKOCYTE_DIFFERENTIATION	GOBP_REGULATION_OF_MYELOID_LEUKOCYTE_DIFFERENTIATION	108	0.575484	1.93812	8.7371e-06	0.000211109	0.000169312	2991	tags=39%, list=16%, signal=33%	EVI2B/IL23A/RASSF2/CD74/CD4/HLA-DRB1/LEF1/HCLS1/LYN/CCR1/C1QC/INPP5D/MAFB/FOS/TYROBP/CASP8/APCS/TLR4/NOTCH2/IFNG/GPR68/PTPN2/GNAS/ATP6AP1/SFRP1/LILRB1/INHBA/LILRB3/RB1/PF4/TREM2/CCL3/ACIN1/JUN/LILRB4/FBN1/TNF/IRF7/TGFB1/ZFP36L1/ZBTB46/TFE3
GOBP_NEGATIVE_REGULATION_OF_CELL_KILLING	GOBP_NEGATIVE_REGULATION_OF_CELL_KILLING	26	0.807758	2.11251	8.77457e-06	0.000211235	0.000169413	1708	tags=54%, list=9%, signal=49%	IL7R/PTPRC/FCGR2B/KLRD1/HLA-F/SERPINB9/HLA-E/HLA-B/LGALS9/ARRB2/KLRC1/HAVCR2/HLA-A/LILRB1
GOBP_POSITIVE_REGULATION_OF_REACTIVE_OXYGEN_SPECIES_METABOLIC_PROCESS	GOBP_POSITIVE_REGULATION_OF_REACTIVE_OXYGEN_SPECIES_METABOLIC_PROCESS	91	0.608726	2.00107	9.32304e-06	0.000222985	0.000178837	1501	tags=32%, list=8%, signal=29%	ITGB2/CRP/CYBA/CLEC7A/SYK/ITGAM/HVCN1/KLF2/HBB/TSPO/RAB27A/AGXT2/PTK2B/ICAM1/KLF4/AKT1/ASS1/GNAI2/IL1B/GSTP1/PTX3/TYROBP/TLR4/PRKCD/SOD2/JAK2/TP53/IFNG/ZC3H12A
GOBP_TRNA_METABOLIC_PROCESS	GOBP_TRNA_METABOLIC_PROCESS	136	-0.546287	-1.88589	9.33079e-06	0.000222985	0.000178837	5239	tags=57%, list=28%, signal=41%	METTL8/EARS2/SEPSECS/POP4/TARS2/POP5/GTPBP3/MTO1/C2orf49/QTRT1/TSEN54/PPA2/THUMPD3/TPRKB/TRMT5/POP1/RPP14/MOCS3/RARS2/ELP4/DTWD1/TRMT112/AARS2/DALRD3/ADAT2/ZBTB8OS/KTI12/THUMPD2/TSEN15/QRSL1/GRSF1/LCMT2/CDK5RAP1/TRUB1/METTL2A/PTCD1/CPSF4/CLP1/TRNT1/AARSD1/CTU2/FAM98B/OSGEPL1/NAT10/YARS2/TRIT1/MARS2/DUS1L/PSTK/METTL2B/RPUSD4/DARS2/TYW3/TSEN2/TRMT12/HARS2/METTL1/AIMP1/AIMP2/SSB/DTWD2/METTL6/TRMT11/…
GOBP_POSITIVE_REGULATION_OF_PHAGOCYTOSIS	GOBP_POSITIVE_REGULATION_OF_PHAGOCYTOSIS	62	0.665339	2.05747	9.54201e-06	0.000227204	0.00018222	2880	tags=58%, list=15%, signal=49%	PTPRC/IL2RB/IL2RG/FCGR2B/FCER1G/DOCK2/CCL2/CYBA/CLEC7A/RAB27A/APOA1/NCKAP1L/IL1B/SIRPG/RAB31/RAPGEF1/SIRPB1/PTX3/CALR/LRP1/C2/IFNG/STAP1/SLC11A1/NOD2/PYCARD/LYAR/SIRPA/IL15/TREM2/PTPRJ/C3/IL15RA/AHSG/TNF/CD300LF
GOBP_POSITIVE_THYMIC_T_CELL_SELECTION	GOBP_POSITIVE_THYMIC_T_CELL_SELECTION	14	0.89997	2.02438	9.75124e-06	0.000231345	0.000185541	975	tags=57%, list=5%, signal=54%	PTPRC/CD3D/CD3G/CD3E/CD74/DOCK2/ITPKB/ZAP70
GOBP_RESPONSE_TO_PAIN	GOBP_RESPONSE_TO_PAIN	27	-0.811514	-2.12248	9.83692e-06	0.000232535	0.000186496	237	tags=22%, list=1%, signal=22%	SLC6A2/THBS4/RELN/SCN9A/CALCA/TAC1
GOBP_REGULATION_OF_REACTIVE_OXYGEN_SPECIES_BIOSYNTHETIC_PROCESS	GOBP_REGULATION_OF_REACTIVE_OXYGEN_SPECIES_BIOSYNTHETIC_PROCESS	82	0.621334	1.99789	1.00154e-05	0.000235903	0.000189198	2176	tags=38%, list=11%, signal=34%	ITGB2/CX3CR1/FYN/CYBA/CLEC7A/KLF2/HBB/TSPO/RAB27A/AGXT2/PTK2B/ICAM1/KLF4/AKT1/PTGIS/ASS1/ALOX5/IL1B/PTX3/TLR4/SOD2/CFLAR/DYNLL1/JAK2/ATP2B4/IFNG/ZC3H12A/GLA/PPARA/CLU/SIRPA
GOCC_MEMBRANE_MICRODOMAIN	GOCC_MEMBRANE_MICRODOMAIN	300	0.447185	1.66489	1.01283e-05	0.000237706	0.000190644	2896	tags=32%, list=15%, signal=28%	CD48/PTPRC/CD8A/MS4A1/KCNA3/ITGB2/FYN/SKAP1/LCP2/CD4/CD2/HCK/RGS19/FAS/HK1/LCK/ITGAM/CD226/LYN/EFHD2/INPP5D/TNFRSF1B/IQGAP1/PTK2B/FXYD1/ICAM1/CD1A/SELPLG/PPT1/CD79A/PTGIS/BTK/GNAI2/PECAM1/CD14/TEK/TLR2/HMOX1/PAG1/CASP8/HPSE/ZAP70/BMPR2/CFLAR/RAP2B/BST2/JAK2/EZR/ATP2B4/LRRK2/CBL/P2RX1/DLC1/PRKAR2B/MS4A4A/S100A10/CNR1/TRADD/STOM/PRNP/ADRA1A/TLR1/PPP2R1B/SRC/F2R/ATP1A2/S1PR1/KDR/ITLN1/GPC1/CRK/PLSCR…
GOBP_CELLULAR_RESPONSE_TO_PEPTIDE	GOBP_CELLULAR_RESPONSE_TO_PEPTIDE	361	0.425327	1.61405	1.10922e-05	0.000259399	0.000208041	3075	tags=31%, list=16%, signal=27%	PTPN22/PRKCB/FYN/ITGA4/VCAM1/UCP2/FCGR2B/JAK3/SERPINA12/PIP4K2A/LYN/ACTN2/KLF2/VIM/PTPRE/ADCY7/CRHBP/ICAM1/KLF4/AKR1B1/AKT1/CCND3/ATP6V0C/ASS1/MAX/PPP1R9B/ATP6V1B2/GNAI2/IL1B/NR4A2/GSTP1/ECHDC3/RAB8B/RAB31/CPS1/SLC39A14/ATP6V0D1/NGFR/TLR4/PRKCD/CFLAR/LGMN/RELA/JAK2/PRKCQ/RIPK2/KLF11/LPIN2/ADCY3/INHBB/LRP1/CASP4/PCK1/TP53/PRKACB/VAMP2/AKT2/STAT5A/APRT/NFKB1/PTPN2/PRKAR2B/ABCC1/STAT3/FOXO1/XBP1/SOC…
GOBP_REGULATION_OF_NIK_NF_KAPPAB_SIGNALING	GOBP_REGULATION_OF_NIK_NF_KAPPAB_SIGNALING	89	0.611902	1.99815	1.16963e-05	0.000271587	0.000217816	3192	tags=48%, list=17%, signal=40%	IL23A/PTPN22/C1QTNF3/RASSF2/NLRC3/LAPTM5/CD86/IL1B/NFKBIA/CD14/TLR2/CD27/TLR4/NLRP12/TNFSF14/CALR/LITAF/LGALS9/RELA/HAVCR2/ZC3H12A/TLR7/TRADD/TERF2IP/NOD2/HDAC7/CYLD/CCL19/RBCK1/TMSB4X/NR3C2/TREM2/PDCD4/APP/NOL3/IL18R1/TNF/AGER/RPS3/LIME1/HMGB1/IFI35/BCL3
GOBP_REGULATION_OF_VIRAL_LIFE_CYCLE	GOBP_REGULATION_OF_VIRAL_LIFE_CYCLE	136	0.543031	1.87123	1.16963e-05	0.000271587	0.000217816	2940	tags=39%, list=15%, signal=33%	FCN1/CCL5/IFITM1/CD74/CD4/APOBEC3C/APOBEC3A/HLA-DRB1/TRIM22/FCN3/OAS2/ISG20/GSN/LAMP3/BCL2/CIITA/LY6E/IFI16/ISG15/APOBEC3G/CLEC4G/OASL/PTX3/TRIM31/APCS/FAM111A/BST2/LGALS9/MX1/TRIM68/TRIM8/TRIM25/CD28/LGALS1/TRIM38/IFITM3/TRIM14/IFITM2/PPARA/PC/APOBEC3F/AXL/PLSCR1/VPS4A/ZC3HAV1/MPHOSPH8/TRIM21/OAS3/TNF/INPP5K/OAS1/TRIM35/VPS37B
GOBP_MODULATION_BY_SYMBIONT_OF_ENTRY_INTO_HOST	GOBP_MODULATION_BY_SYMBIONT_OF_ENTRY_INTO_HOST	46	0.699783	2.06018	1.29564e-05	0.000299783	0.00024043	1989	tags=48%, list=10%, signal=43%	FCN1/IFITM1/CD74/CD4/HLA-DRB1/TRIM22/FCN3/GSN/CIITA/LY6E/PTX3/TRIM31/APCS/LGALS9/TRIM68/TRIM8/TRIM25/LGALS1/TRIM38/IFITM3/TRIM14/IFITM2
GOBP_POSITIVE_REGULATION_OF_MYELOID_CELL_DIFFERENTIATION	GOBP_POSITIVE_REGULATION_OF_MYELOID_CELL_DIFFERENTIATION	90	0.59407	1.9485	1.41035e-05	0.000325175	0.000260794	2451	tags=31%, list=13%, signal=27%	EVI2B/IL23A/CD74/CD4/HLA-DRB1/LEF1/ETS1/HCLS1/CCR1/INPP5D/STAT1/FOS/ISG15/NCKAP1L/TYROBP/CASP8/NOTCH2/IFNG/GPR68/STAT3/GNAS/ATP6AP1/INHBA/RB1/PF4/TREM2/ACIN1/JUN
GOBP_POSITIVE_REGULATION_OF_CHEMOKINE_PRODUCTION	GOBP_POSITIVE_REGULATION_OF_CHEMOKINE_PRODUCTION	58	0.665546	2.03154	1.62846e-05	0.000374146	0.00030007	3211	tags=55%, list=17%, signal=46%	CD74/CLEC7A/AIF1/SYK/CSF1R/IL17RA/MYD88/MCOLN2/IL33/LBP/IL1B/TLR2/HMOX1/TLR4/IL7/LGALS9/HAVCR2/RIPK2/LRP1/IL4R/IFNG/TLR7/NOD2/PYCARD/TWIST1/IL1RL1/APP/TNF/ALOX15B/AGER/HMGB1/EGR1
GOBP_CELLULAR_RESPONSE_TO_ZINC_ION	GOBP_CELLULAR_RESPONSE_TO_ZINC_ION	23	0.826607	2.09931	1.65369e-05	0.000378613	0.000303653	704	tags=35%, list=4%, signal=34%	MT1X/MT1G/MT2A/HVCN1/MT1F/TSPO/MT1M/MT1H
GOBP_REGULATION_OF_CELL_SHAPE	GOBP_REGULATION_OF_CELL_SHAPE	141	0.526799	1.82784	1.74558e-05	0.000398261	0.00031941	1815	tags=28%, list=10%, signal=25%	RAC2/CORO1A/ARHGAP15/ITGB2/FYN/FGR/HCK/RHOH/LST1/CCL2/ANXA1/CSF1R/CDC42EP3/PTK2B/ICAM1/SEMA4D/MSN/SEMA4A/CDC42SE1/RND1/RHOG/EPB41L3/PTN/WDR1/PLEKHO1/PALMD/ARAP1/CDC42SE2/RHOBTB1/SH3KBP1/FMNL3/FMNL1/EZR/LPAR1/FGD2/DLC1/ALDOA/EPB41/CFDP1
GOBP_CELLULAR_RESPONSE_TO_CADMIUM_ION	GOBP_CELLULAR_RESPONSE_TO_CADMIUM_ION	36	0.752662	2.08763	1.85927e-05	0.000422725	0.000339031	856	tags=36%, list=5%, signal=35%	CYBB/MT1X/MMP9/MT1G/MT2A/MT1F/GSN/MT1M/AKT1/FOS/MT1H/CYP1A2/HMOX1
GOBP_REGULATION_OF_MACROPHAGE_ACTIVATION	GOBP_REGULATION_OF_MACROPHAGE_ACTIVATION	51	0.6744	2.03214	1.9138e-05	0.000433617	0.000347766	2726	tags=53%, list=14%, signal=45%	PTPRC/CD74/FCGR2B/HAMP/IL33/LBP/ATM/TLR4/HAVCR2/LRRK2/IL4R/CX3CL1/STAP1/ZC3H12A/CST7/CD200/GRN/SYT11/MFHAS1/NR1H3/PLA2G10/IL1RL1/TREM2/CCL3/VSIG4/MIF/CEBPA
GOBP_NEGATIVE_REGULATION_OF_ADAPTIVE_IMMUNE_RESPONSE	GOBP_NEGATIVE_REGULATION_OF_ADAPTIVE_IMMUNE_RESPONSE	52	0.681518	2.04755	1.93894e-05	0.000437799	0.000351121	2659	tags=46%, list=14%, signal=40%	IL7R/PTPRC/FCGR2B/SAMSN1/JAK3/KLRD1/PTPN6/HLA-F/IL33/CLEC4G/KLRC1/HAVCR2/IL4R/TNFSF18/ZC3H12A/LILRB1/NOD2/C4BPA/TNFRSF14/IL1RL1/CR1/TBX21/ARG1/LILRB4
GOBP_DENDRITIC_CELL_CHEMOTAXIS	GOBP_DENDRITIC_CELL_CHEMOTAXIS	24	0.811516	2.088	2.19077e-05	0.000492961	0.000395361	1982	tags=58%, list=10%, signal=52%	CCL5/CCR7/SLAMF8/CCR2/GPR183/CXCR4/CCR1/CCR5/CALR/LGALS9/TNFSF18/PIK3CG/CCL19/CCL21
GOMF_ORGANIC_ANION_TRANSMEMBRANE_TRANSPORTER_ACTIVITY	GOMF_ORGANIC_ANION_TRANSMEMBRANE_TRANSPORTER_ACTIVITY	167	-0.48735	-1.7142	2.34573e-05	0.000526023	0.000421877	3029	tags=30%, list=16%, signal=25%	SLC23A2/SLC15A4/SLC35B2/SLC22A3/SLC38A3/SLC35B1/SLC25A30/SLC35D1/SLC38A2/SLC35D2/SLC23A1/SLC25A32/SLC35B3/SLC25A14/SLC5A6/SLC4A8/ABCC2/SLC7A1/SLC25A4/SLC35D3/SLC6A1/SFXN1/SLC46A1/SLC3A2/SLC3A1/SLC26A2/SLC25A13/SLCO1A2/CD36/SLCO1B3/SLC4A3/SLC1A2/SLC35A3/SLC4A4/ABCG2/SLC16A1/SLC7A9/SLC26A6/SLC22A9/SLC6A11/GJA1/SLC38A9/SLC19A2/SLC16A7/SLCO6A1/SLC7A11/SLC13A3/SLC26A10/SLC7A3/SLC6A14
GOMF_MHC_CLASS_I_PROTEIN_BINDING	GOMF_MHC_CLASS_I_PROTEIN_BINDING	16	0.866465	2.01851	2.44675e-05	0.000546446	0.000438257	1708	tags=62%, list=9%, signal=57%	CD8A/LILRB2/TAP1/PILRA/HLA-E/TAPBP/CD244/CD8B/TAP2/LILRB1
GOBP_REACTIVE_OXYGEN_SPECIES_BIOSYNTHETIC_PROCESS	GOBP_REACTIVE_OXYGEN_SPECIES_BIOSYNTHETIC_PROCESS	103	0.565015	1.89657	2.4535e-05	0.000546446	0.000438257	2643	tags=39%, list=14%, signal=34%	ITGB2/CX3CR1/FYN/CYBA/CLEC7A/NQO1/KLF2/HBB/TSPO/RAB27A/AGXT2/PTK2B/ICAM1/KLF4/AKT1/PTGIS/ASS1/ALOX5/IL1B/CYP1A2/PTX3/TLR4/SOD2/GCHFR/CFLAR/DYNLL1/JAK2/ATP2B4/IFNG/ZC3H12A/GCH1/GLA/PPARA/CLU/SIRPA/CYB5R3/DUOX2/RGN/DUOX1/HDAC4
GOBP_REGULATION_OF_APOPTOTIC_SIGNALING_PATHWAY	GOBP_REGULATION_OF_APOPTOTIC_SIGNALING_PATHWAY	315	0.427201	1.60065	2.51114e-05	0.000555593	0.000445593	2930	tags=29%, list=15%, signal=25%	S100A8/PTPRC/CX3CR1/FYN/MMP9/CD74/SRPX/CXCL12/CD44/FAS/TNFSF10/LCK/HGF/TMC8/TERT/BMP5/BCL2/ICAM1/AKT1/TNFAIP3/STK4/GNAI2/IL1B/NR4A2/GSTP1/TRAF1/HMOX1/FGA/CASP8/NGFR/LGALS3/PRKCD/SOD2/CFLAR/IL7/ARRB2/RELA/PLAUR/LRRK2/INHBB/CREB3/CX3CL1/CDKN2D/FGG/TP53/BOK/FGB/BMP4/TIMP3/PTPN2/FXN/PMAIP1/XBP1/STX4/TRADD/TNFSF12/SFRP1/GPX1/PTPN1/SIAH2/PYCARD/PPP2R1B/INHBA/CYLD/SRC/RBCK1/S100A9/CLU/RB1/RIPK3/PF4/SP10…
GOBP_REGULATION_OF_B_CELL_DIFFERENTIATION	GOBP_REGULATION_OF_B_CELL_DIFFERENTIATION	30	0.766275	2.04774	2.51154e-05	0.000555593	0.000445593	2411	tags=53%, list=13%, signal=47%	IKZF3/SLAMF8/FCRL3/SYK/PTPN6/INPP5D/NCKAP1L/BTK/CD27/IL7/ZFP36L2/XBP1/SFRP1/INHBA/CR1/NFAM1
GOBP_CHEMOKINE_PRODUCTION	GOBP_CHEMOKINE_PRODUCTION	87	0.593012	1.92638	2.59894e-05	0.000571826	0.000458612	2460	tags=40%, list=13%, signal=35%	S100A8/C1QTNF3/CD74/CLEC7A/AIF1/SYK/CSF1R/IL17RA/MEFV/MYD88/MCOLN2/IL33/KLF4/LBP/IL1B/GSTP1/TLR2/HMOX1/TLR4/IL7/LGALS9/HAVCR2/RIPK2/LRP1/IL4R/IFNG/TLR7/NOD2/PYCARD/S100A9/SIRPA/TWIST1/IL1RL1/TREM2/APP
GOBP_INTEGRIN_MEDIATED_SIGNALING_PATHWAY	GOBP_INTEGRIN_MEDIATED_SIGNALING_PATHWAY	97	0.580758	1.93028	2.60238e-05	0.000571826	0.000458612	2400	tags=39%, list=13%, signal=34%	ITGB2/ITGA4/PLEK/BST1/ITGAL/FERMT3/FGR/ITGBL1/HCK/ITGB7/SYK/ITGAM/TIMP1/LAMA3/APOA1/PTK2B/FLNA/ISG15/ITGAX/PTN/ITGA9/PRAM1/VAV3/FUT8/ZYX/CD40LG/TLN1/TXK/VAV1/SRC/LIMS2/CCM2/RCC2/FERMT2/ITGA8/THY1/ADAM15/CDH17
GOBP_NEGATIVE_REGULATION_OF_LYMPHOCYTE_APOPTOTIC_PROCESS	GOBP_NEGATIVE_REGULATION_OF_LYMPHOCYTE_APOPTOTIC_PROCESS	31	0.754886	2.04333	2.62927e-05	0.000575801	0.0004618	1516	tags=35%, list=8%, signal=33%	IL7R/CCL5/DOCK8/IDO1/CD74/JAK3/CD27/ST3GAL1/PRKCQ/TSC22D3/BMP4
GOBP_T_CELL_HOMEOSTASIS	GOBP_T_CELL_HOMEOSTASIS	36	0.748564	2.07626	2.64981e-05	0.000578365	0.000463856	2550	tags=44%, list=13%, signal=39%	CORO1A/GPR174/JAK3/FAS/BCL2/AKT1/NCKAP1L/TNFSF14/LGALS9/SIT1/TSC22D3/PMAIP1/IL2RA/RIPK3/RPS6/TCIRG1
GOBP_MESODERMAL_CELL_FATE_SPECIFICATION	GOBP_MESODERMAL_CELL_FATE_SPECIFICATION	11	-0.918291	-1.96021	2.68279e-05	0.000583619	0.00046807	709	tags=27%, list=4%, signal=26%	BMPR1A/SFRP2/DKK1
GOBP_POSITIVE_REGULATION_OF_LYMPHOCYTE_MIGRATION	GOBP_POSITIVE_REGULATION_OF_LYMPHOCYTE_MIGRATION	34	0.731491	2.02124	2.73241e-05	0.000592444	0.000475148	836	tags=35%, list=4%, signal=34%	CCL5/ITGA4/DOCK8/CXCL10/CXCL12/CXCL14/CCR2/AIF1/JAM2/SPN/PTK2B/CXCL13
GOBP_PRODUCTION_OF_MOLECULAR_MEDIATOR_INVOLVED_IN_INFLAMMATORY_RESPONSE	GOBP_PRODUCTION_OF_MOLECULAR_MEDIATOR_INVOLVED_IN_INFLAMMATORY_RESPONSE	66	0.650282	2.02797	2.75021e-05	0.000594337	0.000476666	3067	tags=52%, list=16%, signal=43%	GBP5/SLAMF8/NLRC3/CLEC7A/SYK/LYN/MEFV/MYD88/ADCY7/LBP/BTK/ALOX5/RPS19/TLR4/IL17D/IL4R/DUSP10/GPSM3/ZC3H12A/P2RX1/GRN/STAT3/NOD2/PYCARD/PER1/PPARA/SIRPA/PDCD4/LILRB4/TNF/PLD3/CD6/PLD4/CUEDC2
GOBP_CELL_FATE_SPECIFICATION	GOBP_CELL_FATE_SPECIFICATION	85	-0.599036	-1.94232	2.76251e-05	0.00059503	0.000477222	1453	tags=11%, list=8%, signal=10%	OLIG3/SOX9/BMPR1A/TBX3/HOXA13/FGF2/SFRP2/ESRP1/DKK1
GOBP_NEGATIVE_REGULATION_OF_INTERLEUKIN_2_PRODUCTION	GOBP_NEGATIVE_REGULATION_OF_INTERLEUKIN_2_PRODUCTION	27	0.783145	2.06697	2.78439e-05	0.000597037	0.000478831	2659	tags=59%, list=14%, signal=51%	PTPRC/LAPTM5/GBP1/TNFAIP3/NAV3/HAVCR2/EZR/GATA3/PRNP/NOD2/HDAC7/CR1/ZFP36/TBX21/VSIG4/LILRB4
GOBP_NEGATIVE_REGULATION_OF_T_CELL_APOPTOTIC_PROCESS	GOBP_NEGATIVE_REGULATION_OF_T_CELL_APOPTOTIC_PROCESS	20	0.83526	2.06931	2.79006e-05	0.000597037	0.000478831	1516	tags=50%, list=8%, signal=46%	IL7R/CCL5/DOCK8/IDO1/JAK3/CD27/ST3GAL1/PRKCQ/TSC22D3/BMP4
GOCC_VACUOLAR_LUMEN	GOCC_VACUOLAR_LUMEN	156	0.509319	1.77916	2.92007e-05	0.000622822	0.000499511	2618	tags=30%, list=14%, signal=26%	CTSK/LYZ/MNDA/CD74/CTSS/DCN/PLAC8/IFI30/VCAN/ORM2/SDC3/TRAPPC1/PPT1/PADI2/MAN2B1/RNASET2/LUM/CD1E/NAAA/GM2A/HPSE/ASAH1/PRKCD/SERPINA3/LGMN/NPC2/PSAP/GRN/CAP1/IMPDH1/PYCARD/GLA/CTSB/FABP5/PRELP/FTL/GPC1/GYG1/GALC/ACTR2/CYB5R3/OGN/DPP7/C3/BGN/ARG1/ACP2
GOMF_IMMUNOGLOBULIN_BINDING	GOMF_IMMUNOGLOBULIN_BINDING	22	0.819113	2.06127	2.93197e-05	0.000623328	0.000499917	1972	tags=59%, list=10%, signal=53%	MS4A1/CD4/FCGR2B/FCER1G/FCGR3A/FCER1A/FCGR2A/LILRA2/CD22/LGALS3/FCAR/AMBP/HRG
GOBP_REGULATION_OF_NATURAL_KILLER_CELL_ACTIVATION	GOBP_REGULATION_OF_NATURAL_KILLER_CELL_ACTIVATION	33	0.743995	2.02539	3.08957e-05	0.00065471	0.000525086	1130	tags=27%, list=6%, signal=26%	IL23A/PTPN22/FGR/PRDM1/HLA-F/HLA-E/TYROBP/ZBTB1/HAVCR2
GOBP_PROTEIN_KINASE_B_SIGNALING	GOBP_PROTEIN_KINASE_B_SIGNALING	239	0.459367	1.68712	3.26989e-05	0.000690686	0.000553939	3089	tags=32%, list=16%, signal=27%	RAC2/CCL5/TRAT1/CX3CR1/FYN/TMEM100/CCR7/CCL2/HCLS1/PDGFRA/LCK/PIK3R5/PIK3CD/CD86/HGF/BANK1/FGFR2/KLF4/AKT1/ESR1/IL1B/NTRK2/TEK/RHOG/RAPGEF1/RAMP3/IL26/HPSE/ARRB2/RRAS/PPP2R5C/CIB1/GATA3/CX3CL1/CD40/SIRT2/SFRP5/ENG/CD80/CD28/EREG/PIK3CG/MTM1/TSPYL5/GPX1/VAV1/ICOS/MFHAS1/SRC/CCL19/CCL21/IGFBP5/PPARA/RCN3/KDR/FERMT2/OSBPL8/AXL/MAZ/CCL3/P2RY12/KIT/GATA4/PTPRJ/SH2B3/C1QTNF1/TNF/INPP5K/SETX/RPS6KB2/GRB…
GOBP_RESPONSE_TO_ZINC_ION	GOBP_RESPONSE_TO_ZINC_ION	56	0.65323	1.99307	3.40823e-05	0.000717591	0.000575517	1836	tags=30%, list=10%, signal=28%	S100A8/MT1X/VCAM1/MT1G/MT2A/HVCN1/HAMP/MT1F/TSPO/MT1M/ASS1/MT1H/CPS1/SOD2/PLN/CRIP1/HAAO
GOBP_NEGATIVE_T_CELL_SELECTION	GOBP_NEGATIVE_T_CELL_SELECTION	12	0.89882	1.9739	3.4364e-05	0.000721202	0.000578413	1520	tags=67%, list=8%, signal=61%	PTPRC/CCR7/CD3E/THEMIS/CD74/DOCK2/ZAP70/CD28
GOBP_POSITIVE_REGULATION_OF_INFLAMMATORY_RESPONSE	GOBP_POSITIVE_REGULATION_OF_INFLAMMATORY_RESPONSE	121	0.545754	1.85651	3.45205e-05	0.000722173	0.000579192	2779	tags=47%, list=15%, signal=40%	S100A8/IL23A/S100A12/IDO1/CCR7/PTGER4/CCR2/ETS1/FABP4/GPRC5B/IL33/NFKBIZ/HLA-E/IL16/PLA2G7/LBP/BTK/IL1B/NFKBIA/TLR2/PLA2G2A/RPS19/TLR4/NLRP12/DDT/JAK2/CREB3L3/LRRK2/CX3CL1/IFNG/STAP1/TNFSF18/GPSM3/CD28/TLR7/CD81/ABCC1/SUCNR1/GRN/PIK3CG/CNR1/TRADD/MDK/LILRA5/S100A9/PDE2A/TGM2/IL1RL1/IL15/TREM2/CCL3/PDCD4/APP/C3/NUPR1/CEBPA/TNF
GOBP_SECRETION_BY_TISSUE	GOBP_SECRETION_BY_TISSUE	32	-0.73965	-2.00302	3.48065e-05	0.000725838	0.000582131	735	tags=12%, list=4%, signal=12%	CELSR2/STK39/AGR2/TAC1
GOBP_KILLING_OF_CELLS_OF_OTHER_ORGANISM	GOBP_KILLING_OF_CELLS_OF_OTHER_ORGANISM	59	0.655517	2.00006	3.53876e-05	0.000735612	0.00058997	2158	tags=25%, list=11%, signal=23%	GNLY/PRF1/LYZ/S100A12/CLEC7A/SYK/HAMP/SERPINB9/CASP8/RPS19/IFNG/P2RX7/APOL1/HRG/PF4
GOBP_ICOSANOID_BIOSYNTHETIC_PROCESS	GOBP_ICOSANOID_BIOSYNTHETIC_PROCESS	46	0.683651	2.01269	3.59649e-05	0.000745247	0.000597697	2002	tags=37%, list=11%, signal=33%	CD74/AVPR1A/ANXA1/PTGDS/SYK/CYP2C8/CYP4A11/ALOX5AP/GGTA1/PTGIS/ALOX5/IL1B/PTGS1/GGT5/TBXAS1/LTA4H/FABP5
GOBP_REGULATION_OF_SMALL_GTPASE_MEDIATED_SIGNAL_TRANSDUCTION	GOBP_REGULATION_OF_SMALL_GTPASE_MEDIATED_SIGNAL_TRANSDUCTION	300	0.43345	1.61375	3.61361e-05	0.000745491	0.000597894	2121	tags=22%, list=11%, signal=20%	RAC2/ARHGAP15/ARHGDIB/GPR65/ARHGAP30/GPR174/TAGAP/ARHGEF6/ARHGAP9/RHOH/ARHGAP25/FBP1/P2RY8/LPAR6/LYN/RASGRP1/TIAM1/APOA1/RASGRF1/ARAP2/ITPKB/ABR/GPR18/RASA3/P2RY10/PREX1/CDC42SE1/RHOG/STK19/RAPGEF1/FAM13A/ARHGEF3/ARAP1/CDC42SE2/NOTCH2/RHOBTB1/RAP1GAP2/PSD4/VAV3/TIMP2/ARHGEF1/JAK2/SH3BP1/CBL/RASGRP4/LPAR1/GMIP/ARHGAP4/CYTH4/FGD2/INPP5B/DLC1/APOE/PIK3CG/HEG1/RAP1GAP/ADRA1A/VAV1/SRC/APOC3/F2R/ARRB1/…
GOMF_SERINE_HYDROLASE_ACTIVITY	GOMF_SERINE_HYDROLASE_ACTIVITY	168	0.504916	1.78016	3.62044e-05	0.000745491	0.000597894	2202	tags=21%, list=12%, signal=19%	GZMH/GZMA/GZMK/GZMB/MMP9/HGF/PIK3IP1/KLK4/CD5L/CPVL/PLGLB2/F9/MMP7/HTRA1/C1R/PLAT/PRCP/HP/HABP2/CFI/C2/KLKB1/MST1/PCSK7/CFB/MBTPS1/PLG/HPR/PROZ/C1RL/MMP2/NAALAD2/C1S/CTSH/HTRA4/CLPP
GOBP_RESPONSE_TO_TUMOR_NECROSIS_FACTOR	GOBP_RESPONSE_TO_TUMOR_NECROSIS_FACTOR	280	0.431858	1.60041	3.6812e-05	0.000755627	0.000606022	2801	tags=34%, list=15%, signal=29%	CCL5/VCAM1/CASP1/CARD16/LAPTM5/CCL2/TNFSF13B/CCL18/GBP1/FAS/PSMB9/SYK/TNFSF8/LTB/HAMP/KLF2/AIM2/FABP4/TNFRSF1B/STAT1/APOA1/PTK2B/CRHBP/ICAM1/AKT1/TNFRSF9/PSMB8/TNFAIP3/ASS1/BIRC3/GBP2/NFKBIA/CD14/GSTP1/TRAF1/TNFRSF17/CD27/CASP8/ASAH1/TNFSF14/CARD8/RELA/IGBP1/JAK2/ZFP36L2/CIB1/CCDC3/TRAF3/CASP4/GATA3/CX3CL1/CD40/PCK1/TP53/CD40LG/CCL8/CCL20/TNFSF18/ZC3H12A/NFKB1/GCH1/PTPN2/PSME1/PSME2/TRADD/TNFSF12…
GOBP_POSITIVE_REGULATION_OF_MYELOID_LEUKOCYTE_DIFFERENTIATION	GOBP_POSITIVE_REGULATION_OF_MYELOID_LEUKOCYTE_DIFFERENTIATION	54	0.656676	1.99217	3.83275e-05	0.000784276	0.000629	2451	tags=39%, list=13%, signal=34%	EVI2B/IL23A/CD74/CD4/HLA-DRB1/LEF1/HCLS1/CCR1/FOS/TYROBP/CASP8/NOTCH2/IFNG/GPR68/GNAS/ATP6AP1/RB1/PF4/TREM2/ACIN1/JUN
GOBP_PHAGOCYTOSIS_RECOGNITION	GOBP_PHAGOCYTOSIS_RECOGNITION	29	0.773685	2.06086	3.9892e-05	0.000813747	0.000652636	903	tags=31%, list=5%, signal=30%	FCN1/TRBC1/IGHA1/IGHM/CRP/CLEC7A/FCN3/LBP/PTX3
GOBP_DENDRITIC_CELL_MIGRATION	GOBP_DENDRITIC_CELL_MIGRATION	29	0.773175	2.0595	4.104e-05	0.000834564	0.000669331	1982	tags=55%, list=10%, signal=49%	CCL5/DOCK8/CCR7/SLAMF8/CCR2/GPR183/CXCR4/CCR1/CCR5/ALOX5/CALR/LGALS9/TNFSF18/PIK3CG/CCL19/CCL21
GOBP_B_CELL_HOMEOSTASIS	GOBP_B_CELL_HOMEOSTASIS	28	0.763157	2.02397	4.2156e-05	0.000854604	0.000685404	746	tags=36%, list=4%, signal=34%	DOCK11/CD74/TNFSF13B/DOCK10/GAPT/LYN/BCL2/TNFAIP3/NCKAP1L/MEF2C
GOBP_ANTIGEN_PROCESSING_AND_PRESENTATION_OF_ENDOGENOUS_ANTIGEN	GOBP_ANTIGEN_PROCESSING_AND_PRESENTATION_OF_ENDOGENOUS_ANTIGEN	26	0.785191	2.05349	4.23619e-05	0.000856129	0.000686626	2004	tags=69%, list=11%, signal=62%	CD74/HLA-DRB1/TAP1/ERAP2/HLA-DRA/CD1C/HLA-F/CD1A/HLA-E/HLA-B/CD1B/HLA-C/TAPBP/CD1E/TAP2/HLA-A/HLA-H/B2M
GOBP_LEUKOCYTE_TETHERING_OR_ROLLING	GOBP_LEUKOCYTE_TETHERING_OR_ROLLING	30	0.756673	2.02208	4.34761e-05	0.000875943	0.000702517	595	tags=33%, list=3%, signal=32%	SELL/CX3CR1/ITGA4/VCAM1/CXCL12/ITGB7/JAM2/PTAFR/SPN/SELPLG
GOBP_POSITIVE_REGULATION_OF_TYROSINE_PHOSPHORYLATION_OF_STAT_PROTEIN	GOBP_POSITIVE_REGULATION_OF_TYROSINE_PHOSPHORYLATION_OF_STAT_PROTEIN	63	0.639468	1.98496	4.42444e-05	0.000888688	0.000712739	1724	tags=25%, list=9%, signal=23%	CCL5/IL23A/IL24/FYN/HCLS1/CSF1R/LYN/FLT3/JAK2/CD40/IFNG/TNFSF18/STAT3/HPX/SOCS3/GHR
GOBP_NEGATIVE_REGULATION_OF_VIRAL_PROCESS	GOBP_NEGATIVE_REGULATION_OF_VIRAL_PROCESS	82	0.5983	1.92382	4.5551e-05	0.000909904	0.000729755	2892	tags=46%, list=15%, signal=39%	FCN1/CCL5/IFITM1/APOBEC3C/APOBEC3A/FCN3/OAS2/ISG20/GSN/STAT1/CIITA/LY6E/IFI16/ISG15/APOBEC3G/OASL/PTX3/TRIM31/APCS/FAM111A/BST2/MX1/TRIM8/TRIM25/IFITM3/TRIM14/IFITM2/APOBEC3F/PLSCR1/ZFP36/ZC3HAV1/MPHOSPH8/TRIM21/OAS3/TNF/INPP5K/OAS1/TRIM35
GOBP_SMALL_GTPASE_MEDIATED_SIGNAL_TRANSDUCTION	GOBP_SMALL_GTPASE_MEDIATED_SIGNAL_TRANSDUCTION	470	0.385632	1.49957	4.56199e-05	0.000909904	0.000729755	2932	tags=26%, list=15%, signal=22%	RAC2/ARHGAP15/ARHGDIB/GPR65/ARHGAP30/DOCK8/GPR174/TAGAP/ARHGEF6/DOCK11/ARHGAP9/RHOH/DOCK2/ARHGAP25/RGS19/FBP1/P2RY8/DOCK10/AIF1/CDC42EP3/LPAR6/LYN/RASGRP1/TIAM1/APOA1/RASGRF1/ARAP2/ITPKB/ABR/RASGRP2/GPR18/RASA3/P2RY10/PREX1/CDC42SE1/RND1/RHOG/STK19/RAPGEF1/HMOX1/NGFR/FAM13A/ARHGEF3/ARAP1/CDC42SE2/ADRA2A/NOTCH2/RHOBTB1/RAP1GAP2/RAP2B/CCDC88C/PSD4/WASF2/VAV3/TNK2/TIMP2/ARHGEF1/RRAS/JAK2/SH3BP1/TP53…
GOBP_RIBOSOME_BIOGENESIS	GOBP_RIBOSOME_BIOGENESIS	265	-0.442601	-1.64565	4.57176e-05	0.000909904	0.000729755	3607	tags=34%, list=19%, signal=28%	ZNHIT3/NSUN5/NSUN4/RRP8/GAR1/DKC1/RPS27L/DHX30/RPL7/ZNHIT6/EXOSC8/DIS3/WDR43/EXOSC9/NLE1/MDN1/MRPL1/EIF6/NOP2/EXOSC7/EIF4A3/CUL4A/NAT10/UTP6/GNL3L/RIOK3/VCX/NOP56/WDR55/DDX21/NOP58/RRP9/CHD7/ZNF622/USP36/FASTKD2/GTPBP10/NSUN5P2/DDX10/RPUSD4/NMD3/AATF/RRP1B/PA2G4/NHP2/RPF2/RPL26L1/EMG1/HEATR1/SHQ1/RRS1/PWP1/SRFBP1/WDR75/MAK16/WDR3/LTV1/SBDS/EXOSC3/RIOK1/MPHOSPH10/XPO1/RPL7L1/NPM1/DDX52/NOP16/UTP18…
GOBP_MEMBRANE_INVAGINATION	GOBP_MEMBRANE_INVAGINATION	74	0.608105	1.94129	4.68657e-05	0.000929929	0.000745815	1366	tags=28%, list=7%, signal=26%	TRBC1/RAC2/IGHA1/IGHM/ITGB2/FCGR2B/RHOH/ARHGAP25/BIN2/AIF1/MARCO/ITGAM/GSN/CD300A/NCKAP1L/CHMP4A/RHOG/RAB31/RHOBTB1/SH3BP1/STAP1
GOBP_INTERLEUKIN_4_PRODUCTION	GOBP_INTERLEUKIN_4_PRODUCTION	32	0.747718	2.03407	4.70697e-05	0.000931155	0.000746798	1520	tags=53%, list=8%, signal=49%	CD3E/FCER1G/SASH3/HLA-DRB1/LEF1/SYK/CD86/IRF4/IL33/HLA-E/CD83/LGALS9/HAVCR2/PRKCQ/GATA3/CD40LG/CD28
GOBP_POSITIVE_REGULATION_OF_REACTIVE_OXYGEN_SPECIES_BIOSYNTHETIC_PROCESS	GOBP_POSITIVE_REGULATION_OF_REACTIVE_OXYGEN_SPECIES_BIOSYNTHETIC_PROCESS	46	0.677632	1.99497	4.99997e-05	0.000986138	0.000790895	1343	tags=39%, list=7%, signal=36%	ITGB2/CYBA/CLEC7A/KLF2/HBB/RAB27A/AGXT2/PTK2B/ICAM1/KLF4/AKT1/ASS1/IL1B/PTX3/TLR4/SOD2/JAK2/IFNG
GOMF_FATTY_ACID_BINDING	GOMF_FATTY_ACID_BINDING	34	0.721813	1.9945	5.14312e-05	0.001009	0.000809233	2002	tags=38%, list=11%, signal=34%	S100A8/PTGDS/FABP1/AFP/FABP4/FABP3/ALOX5AP/AFM/GSTP1/APOC1/ALB/S100A9/FABP5
GOBP_REGULATION_OF_MACROPHAGE_MIGRATION	GOBP_REGULATION_OF_MACROPHAGE_MIGRATION	37	0.715249	1.99537	5.1601e-05	0.001009	0.000809233	2947	tags=62%, list=15%, signal=53%	CCL5/CX3CR1/SLAMF8/CSF1R/PTK2B/C5AR1/C3AR1/DDT/CX3CL1/STAP1/MST1/TNFSF18/CD200/CD81/MDK/TREM2/CCL3/P2RY12/MIF/MAPK3/RARRES2/CXCL17/CMKLR1
GOBP_REGULATION_OF_RESPONSE_TO_CYTOKINE_STIMULUS	GOBP_REGULATION_OF_RESPONSE_TO_CYTOKINE_STIMULUS	162	0.497847	1.75133	5.17131e-05	0.001009	0.000809233	2042	tags=29%, list=11%, signal=26%	PTPRC/CCL5/NLRC5/CD74/CASP1/CARD16/LAPTM5/IRAK3/CXCR4/SYK/PTPN6/SAMHD1/LIFR/STAT1/APOA1/KLF4/PADI2/TNFAIP3/BIRC3/ELF1/GSTP1/TLR2/TRAF1/CASP8/TLR4/CARD8/IL7/JAK2/RIPK2/CCDC3/CASP4/IL1RN/IFNG/STAP1/PIAS1/PTPN2/TXK/HPX/IFNGR2/TRADD/SOCS3/PTPN1/PYCARD/CYLD/RBCK1/NR1H3/IKBKE
GOBP_RESPIRATORY_BURST	GOBP_RESPIRATORY_BURST	28	0.759663	2.0147	5.17753e-05	0.001009	0.000809233	1678	tags=54%, list=9%, signal=49%	RAC2/IGHA1/CYBB/SLAMF8/HCK/CYBA/CLEC7A/PIK3CD/NCF2/LBP/RPS19/DUSP10/GRN/PIK3CG/SLC11A1
GOMF_IMMUNOGLOBULIN_RECEPTOR_BINDING	GOMF_IMMUNOGLOBULIN_RECEPTOR_BINDING	11	0.908782	1.95245	5.31746e-05	0.00103222	0.000827852	602	tags=45%, list=3%, signal=44%	TRBC1/IGHA1/IGHM/FGR/FLNA
GOBP_POSITIVE_REGULATION_OF_ALPHA_BETA_T_CELL_DIFFERENTIATION	GOBP_POSITIVE_REGULATION_OF_ALPHA_BETA_T_CELL_DIFFERENTIATION	49	0.681708	2.04389	5.34226e-05	0.00103222	0.000827852	1518	tags=41%, list=8%, signal=38%	IL23A/SASH3/HLA-DRB1/ANXA1/RUNX3/SYK/CD86/HLA-DRA/ITPKB/NFKBIZ/CD83/NCKAP1L/MALT1/ZAP70/LGALS9/IL12RB1/RIPK2/IL4R/IFNG/CD80
GOBP_RNA_LOCALIZATION	GOBP_RNA_LOCALIZATION	206	-0.451165	-1.62632	5.34395e-05	0.00103222	0.000827852	4155	tags=45%, list=22%, signal=35%	EXOSC10/G3BP2/NUP98/RAN/RUVBL1/ARC/SARNP/UPF3B/SEC13/IWS1/THOC1/TCP1/PCID2/CPSF2/CPSF6/NCBP1/NCBP2/MRPL18/POM121C/AGFG1/HNRNPA2B1/CCT8/ZNHIT3/HNRNPU/DKC1/CPSF4/RAE1/SFPQ/ZNHIT6/DHX36/MAGOHB/ATR/EIF6/NUP43/SENP2/EIF4A3/TERF1/KHDRBS1/NUP153/CKAP5/NOP58/ENY2/PURA/PRPF6/SMG7/CCT2/CPSF3/NMD3/FMR1/NHP2/NUP35/SHQ1/RRS1/CCT4/NUP160/SEH1L/NUP37/SLU7/LTV1/EXOSC3/XPO1/TPR/NPM1/NUP133/SSB/POM121/PRPF18/UPF2/…
GOMF_CYTOKINE_ACTIVITY	GOMF_CYTOKINE_ACTIVITY	213	0.463937	1.69214	5.74494e-05	0.00110641	0.000887353	2475	tags=26%, list=13%, signal=23%	CCL5/IL23A/IL24/CXCL9/CXCL10/CXCL12/CXCL14/CCL2/TNFSF13B/CCL18/TNFSF10/TNFSF8/LTB/IL32/BMP5/TIMP1/IL33/CXCL11/CXCL2/IL16/IL1B/CXCL13/IL26/INHBE/TNFSF14/IL7/IL17D/SECTM1/INHBB/CX3CL1/IL1RN/CMTM3/IFNG/CD40LG/CCL8/CCL20/TNFSF18/IFNA21/BMP4/GRN/TNFSF12/PPBP/INHBA/CCL19/CCL21/BMP10/TGFB3/PF4/CCL25/IL15/CCL3/CCL23/CMTM7/WNT2B/BMP6
GOBP_REGULATION_OF_CALCIUM_ION_TRANSMEMBRANE_TRANSPORT	GOBP_REGULATION_OF_CALCIUM_ION_TRANSMEMBRANE_TRANSPORT	132	0.521635	1.7903	5.83349e-05	0.00112017	0.000898387	2489	tags=26%, list=13%, signal=23%	CORO1A/CXCL9/FYN/CXCL10/FGF14/PTPN6/PDE4B/GEM/LYN/PTK2B/CXCL11/SLC8A1/CAPN3/RAMP3/APLNR/CLIC2/ADRA2A/STIM2/CX3CL1/PLN/PIK3CG/PRNP/ANK2/F2R/ATP1A2/DRD1/CALM1/PDE4D/BDKRB1/CACNB2/CAMK2D/CALM3/THY1/RGN
GOBP_RESPONSE_TO_INORGANIC_SUBSTANCE	GOBP_RESPONSE_TO_INORGANIC_SUBSTANCE	500	0.378507	1.48078	6.06585e-05	0.00116138	0.000931441	2901	tags=27%, list=15%, signal=24%	S100A8/FYN/CYBB/CCR7/FBLN5/MT1X/MMP9/VCAM1/UCP2/AVPR1A/MT1G/ANXA1/ETS1/FBP1/MT2A/FOSB/NQO1/HVCN1/FABP1/HGF/HAMP/KLF2/MT1F/HBB/FABP4/TERT/GSN/TSPO/ALOX5AP/IQGAP1/BCL2/ADCY7/PTK2B/CRHBP/ITPKB/MT1M/C1QA/ICAM1/KLF4/TXNIP/AKR1B1/CYBRD1/AKT1/RASGRP2/TNFAIP3/ASS1/FOS/MT1H/CYP1A2/CD14/MEF2C/SLC8A1/FIBIN/CAPN3/CPS1/HMOX1/FGA/AQP1/CASP8/PRKCD/SOD2/CFLAR/CALR/HP/LGMN/AQP3/RELA/TAT/CPNE2/JUNB/ATP2B4/LRRK2/IG…
GOMF_HORMONE_ACTIVITY	GOMF_HORMONE_ACTIVITY	106	-0.548451	-1.82541	6.41275e-05	0.00122422	0.000981839	562	tags=9%, list=3%, signal=9%	PTHLH/FNDC5/ADM/VGF/CHGB/STC2/NTS/STC1/PENK/CALCA
GOCC_PROTEIN_LIPID_COMPLEX	GOCC_PROTEIN_LIPID_COMPLEX	37	0.710126	1.98108	6.45981e-05	0.00122962	0.000986169	2172	tags=57%, list=11%, signal=50%	SAA1/SAA2/APOF/SAA4/APOA1/PLA2G7/LIPC/APOA5/LCAT/APOC4/CETP/HPR/APOC1/APOE/DBI/APOL1/APOM/APOC2/APOC3/CLU/PLTP
GOMF_T_CELL_RECEPTOR_BINDING	GOMF_T_CELL_RECEPTOR_BINDING	11	0.906196	1.9469	6.4826e-05	0.00123038	0.00098678	599	tags=73%, list=3%, signal=70%	CD3G/FYN/CD3E/DOCK2/HLA-DRB1/LCK/HLA-DRA/HLA-E
GOBP_REGULATION_OF_T_HELPER_CELL_DIFFERENTIATION	GOBP_REGULATION_OF_T_HELPER_CELL_DIFFERENTIATION	39	0.701592	1.98865	6.75836e-05	0.00127901	0.00102578	1518	tags=38%, list=8%, signal=35%	IL23A/JAK3/HLA-DRB1/ANXA1/CD86/IRF4/HLA-DRA/NFKBIZ/MALT1/IL12RB1/RIPK2/IL4R/TNFSF18/ZC3H12A/CD80
GOBP_REGULATION_OF_BIOLOGICAL_PROCESS_INVOLVED_IN_SYMBIOTIC_INTERACTION	GOBP_REGULATION_OF_BIOLOGICAL_PROCESS_INVOLVED_IN_SYMBIOTIC_INTERACTION	179	0.486253	1.72638	6.93681e-05	0.00130791	0.00104896	2940	tags=36%, list=15%, signal=31%	FCN1/CCL5/IFITM1/CD74/CD4/APOBEC3C/APOBEC3A/HLA-DRB1/TRIM22/CXCR4/FCN3/OAS2/ISG20/GSN/STAT1/LAMP3/BCL2/CIITA/LY6E/IFI16/ISG15/APOBEC3G/CLEC4G/OASL/PTX3/TRIM31/APCS/FAM111A/BST2/LGALS9/POLR2A/MX1/TRIM68/TRIM8/TRIM25/CD28/LGALS1/MDFIC/TRIM38/IFITM3/TRIM14/IFITM2/PPARA/PC/APOBEC3F/AXL/POLR2E/PLSCR1/VPS4A/ZFP36/POLR2J/POLR2L/ZC3HAV1/MPHOSPH8/ARG1/TRIM21/GTF2F1/CTDP1/OAS3/TNF/INPP5K/OAS1/TRIM35/VPS37B
GOBP_ANTIGEN_PROCESSING_AND_PRESENTATION_OF_PEPTIDE_OR_POLYSACCHARIDE_ANTIGEN_VIA_MHC_CLASS_II	GOBP_ANTIGEN_PROCESSING_AND_PRESENTATION_OF_PEPTIDE_OR_POLYSACCHARIDE_ANTIGEN_VIA_MHC_CLASS_II	97	0.563727	1.87368	6.951e-05	0.00130791	0.00104896	1093	tags=23%, list=6%, signal=21%	HLA-DRB4/HLA-DMB/HLA-DRB5/CD74/FCGR2B/FCER1G/CTSS/HLA-DPA1/HLA-DMA/HLA-DOA/HLA-DRB1/AP1S2/HLA-DPB1/HLA-DOB/IFI30/HLA-DQA1/HLA-DRA/HLA-DQB1/AP2M1/DYNC1I1/DYNLL1/LGMN
GOBP_TOLERANCE_INDUCTION	GOBP_TOLERANCE_INDUCTION	25	0.77901	2.00789	7.06661e-05	0.00132585	0.00106335	3309	tags=72%, list=17%, signal=60%	IDO1/CD3E/LILRB2/IRAK3/LYN/HLA-E/CCR4/TNFAIP3/HLA-B/LGALS9/HAVCR2/IL2RA/ICOS/CBLB/LILRB4/PHLPP1/HMGB1/TGFBR2
GOBP_ALPHA_BETA_T_CELL_PROLIFERATION	GOBP_ALPHA_BETA_T_CELL_PROLIFERATION	33	0.728019	1.9819	7.27415e-05	0.00135748	0.00108871	1614	tags=48%, list=8%, signal=44%	PTPRC/IL23A/PTPN22/CD3E/DOCK2/CCR2/SYK/ELF4/IRF1/HLA-E/ZAP70/LGALS9/RIPK2/HLA-A/CD28/CD81
GOBP_PLATELET_DEGRANULATION	GOBP_PLATELET_DEGRANULATION	121	0.535469	1.82152	7.27663e-05	0.00135748	0.00108871	2769	tags=44%, list=15%, signal=38%	PLEK/FERMT3/SRGN/SYK/F13A1/CTSW/HGF/LYN/ORM2/ACTN2/SPP2/A1BG/TIMP1/ORM1/APOA1/FLNA/PECAM1/SERPINF2/FGA/WDR1/SERPINA3/PSAP/SELP/ITIH4/FGG/VEGFB/ANXA5/TLN1/PLG/SERPINA1/P2RX1/FGB/TIMP3/MMRN1/ALB/ALDOA/PPBP/VEGFC/TMSB4X/HRG/PCYOX1L/CLU/TUBA4A/CALM1/TGFB3/PF4/ISLR/APP/SERPING1/KNG1/RARRES2/STXBP2/AHSG
GOBP_NEUROPEPTIDE_SIGNALING_PATHWAY	GOBP_NEUROPEPTIDE_SIGNALING_PATHWAY	101	-0.556111	-1.84384	7.30148e-05	0.00135824	0.00108933	646	tags=7%, list=3%, signal=7%	SCG5/SORT1/GLRB/NTS/PENK/CALCA/TAC1
GOMF_MHC_CLASS_II_PROTEIN_COMPLEX_BINDING	GOMF_MHC_CLASS_II_PROTEIN_COMPLEX_BINDING	16	0.850086	1.98035	7.3407e-05	0.00136167	0.00109208	430	tags=56%, list=2%, signal=55%	MS4A1/HLA-DMB/CD74/CD4/HLA-DMA/HLA-DOA/HLA-DRB1/HLA-DOB/HLA-DRA
GOBP_NEGATIVE_REGULATION_OF_B_CELL_ACTIVATION	GOBP_NEGATIVE_REGULATION_OF_B_CELL_ACTIVATION	33	0.727591	1.98073	7.39242e-05	0.00136739	0.00109666	1865	tags=52%, list=10%, signal=47%	MNDA/FCGR2B/LAPTM5/SAMSN1/LYN/BANK1/CD300A/INPP5D/TNFAIP3/BTK/ATM/CTLA4/TYROBP/SFRP1/TNFRSF13B/INHBA/TBC1D10C
GOBP_G_PROTEIN_COUPLED_PURINERGIC_NUCLEOTIDE_RECEPTOR_SIGNALING_PATHWAY	GOBP_G_PROTEIN_COUPLED_PURINERGIC_NUCLEOTIDE_RECEPTOR_SIGNALING_PATHWAY	14	0.871153	1.95956	7.68256e-05	0.00141307	0.0011333	641	tags=43%, list=3%, signal=41%	GPR171/P2RY13/P2RY8/PTAFR/P2RY14/P2RY10
GOMF_G_PROTEIN_COUPLED_PURINERGIC_NUCLEOTIDE_RECEPTOR_ACTIVITY	GOMF_G_PROTEIN_COUPLED_PURINERGIC_NUCLEOTIDE_RECEPTOR_ACTIVITY	14	0.871153	1.95956	7.68256e-05	0.00141307	0.0011333	641	tags=43%, list=3%, signal=41%	GPR171/P2RY13/P2RY8/PTAFR/P2RY14/P2RY10
GOCC_FICOLIN_1_RICH_GRANULE_LUMEN	GOCC_FICOLIN_1_RICH_GRANULE_LUMEN	122	0.535092	1.8178	7.72789e-05	0.00141743	0.0011368	2265	tags=32%, list=12%, signal=28%	FCN1/MNDA/GMFG/MMP9/FGL2/HSPA6/CTSS/BIN2/HBB/COTL1/A1BG/GSN/LRG1/CTSZ/PLEKHO2/ALOX5/GSTP1/AMPD3/CST3/CRISPLD2/OSTF1/ASAH1/MVP/TIMP2/HK3/SERPINA1/PGM1/ALDOA/IMPDH1/LTA4H/ACTR1B/CTSB/PRG2/CTSH/DBNL/YPEL5/ALAD/GYG1/ACTR2
GOBP_GOLGI_VESICLE_TRANSPORT	GOBP_GOLGI_VESICLE_TRANSPORT	341	-0.408146	-1.54965	8.15378e-05	0.00149137	0.0011961	3446	tags=35%, list=18%, signal=29%	AP4M1/HYOU1/CD59/ARCN1/TMED2/BNIP1/SEC24D/TRAPPC6B/LMAN2/DYNC1LI1/PITPNB/RAB13/SEC24B/SEC23IP/COG6/BET1L/ZW10/F5/RAB10/TRAPPC2/SEC22B/CCDC91/SEC23A/PRKCI/TRAPPC4/GOLGA7/GOSR1/NRBP2/GOLT1A/ERGIC1/STX6/SNX12/TRIP11/ERGIC3/TMED9/PGAP1/EXOC2/CLN3/SEC31A/ARFGAP3/VAMP7/GCC2/COG2/MYO1B/VAPA/COPA/TGFA/TMED3/MIA2/SEC23B/RAB1A/CCDC93/SORCS1/TMED7/SAR1B/KIF3B/SNX2/BBS1/KLHL20/NAPG/PREB/ARF4/CREB3L2/SCAMP3/C…
GOBP_MATURE_B_CELL_DIFFERENTIATION_INVOLVED_IN_IMMUNE_RESPONSE	GOBP_MATURE_B_CELL_DIFFERENTIATION_INVOLVED_IN_IMMUNE_RESPONSE	26	0.771695	2.0182	8.28254e-05	0.0015107	0.0012116	2524	tags=58%, list=13%, signal=50%	ITM2A/POU2AF1/DOCK11/FCGR2B/DOCK10/GPR183/PTK2B/ST3GAL1/NOTCH2/MFNG/LGALS1/XBP1/CR1/CDH17/ADA
GOBP_REGULATION_OF_T_CELL_MIGRATION	GOBP_REGULATION_OF_T_CELL_MIGRATION	40	0.695409	1.99163	8.33409e-05	0.00151588	0.00121575	2460	tags=45%, list=13%, signal=39%	CCL5/ITGA4/DOCK8/CXCL10/CXCL12/CCR2/AIF1/SPN/CXCL13/LRCH1/CCL20/CD200/PYCARD/CCL21/RIPK3/CRK/TNFRSF14/APP
GOBP_APPENDAGE_DEVELOPMENT	GOBP_APPENDAGE_DEVELOPMENT	159	-0.489868	-1.7248	8.52766e-05	0.00154252	0.00123712	2724	tags=22%, list=14%, signal=19%	SLC39A1/EXT1/CTNNB1/INTU/SALL4/CHD7/LRP5/ATRX/MED1/IFT80/PAM/TULP3/CRABP2/SOX9/DYNC2H1/PCSK5/HDAC2/COMP/BMPR1A/TBX3/GREM1/RSPO2/FZD6/HOXA13/ZNRF3/ITGA6/MEOX2/SOX4/SLC7A11/SFRP2/SEMA3C/DLX6/FREM2/FRAS1/DKK1
GOCC_PHAGOCYTIC_VESICLE_MEMBRANE	GOCC_PHAGOCYTIC_VESICLE_MEMBRANE	74	0.597936	1.90882	8.52766e-05	0.00154252	0.00123712	2410	tags=43%, list=13%, signal=38%	RAC2/CORO1A/CYBB/CYBA/TAP1/HVCN1/HLA-F/HLA-E/ATP6V0C/HLA-B/TLR2/HLA-C/RAB8B/RAB31/RAPGEF1/TAPBP/ATP6V0D1/CALR/TAP2/RAB20/HLA-A/INPP5B/RAB43/SLC11A1/STX4/TLR1/HLA-H/B2M/RILP/ATP6V0B/RAB32/ATP6V0A2
GOCC_SPECIFIC_GRANULE_LUMEN	GOCC_SPECIFIC_GRANULE_LUMEN	60	0.625003	1.91759	8.88657e-05	0.00160301	0.00128563	1100	tags=27%, list=6%, signal=25%	LCN2/LYZ/CHIT1/DOCK2/CFP/PTPN6/ORM2/RAB27A/ORM1/LRG1/CNN2/CTSZ/PTX3/HPSE/HP/TIMP2
GOBP_POSITIVE_REGULATION_OF_CD4_POSITIVE_ALPHA_BETA_T_CELL_DIFFERENTIATION	GOBP_POSITIVE_REGULATION_OF_CD4_POSITIVE_ALPHA_BETA_T_CELL_DIFFERENTIATION	32	0.735243	2.00013	9.22827e-05	0.00166007	0.0013314	1518	tags=50%, list=8%, signal=46%	IL23A/SASH3/HLA-DRB1/ANXA1/CD86/HLA-DRA/NFKBIZ/CD83/NCKAP1L/MALT1/LGALS9/IL12RB1/RIPK2/IL4R/IFNG/CD80
GOCC_CLATHRIN_COATED_ENDOCYTIC_VESICLE_MEMBRANE	GOCC_CLATHRIN_COATED_ENDOCYTIC_VESICLE_MEMBRANE	37	0.702662	1.96025	9.42296e-05	0.00169045	0.00135576	1002	tags=27%, list=5%, signal=26%	HLA-DRB4/HLA-DRB5/CD74/HLA-DPA1/HLA-DRB1/HLA-DPB1/HLA-DQA1/HLA-DRA/HLA-DQB1/AP2M1
GOBP_POSITIVE_REGULATION_OF_CD4_POSITIVE_ALPHA_BETA_T_CELL_ACTIVATION	GOBP_POSITIVE_REGULATION_OF_CD4_POSITIVE_ALPHA_BETA_T_CELL_ACTIVATION	38	0.701666	1.97992	9.71265e-05	0.00173766	0.00139363	1913	tags=50%, list=10%, signal=45%	IL23A/SASH3/HLA-DRB1/ANXA1/CD86/HLA-DRA/NFKBIZ/CD83/NCKAP1L/MALT1/LGALS9/IL12RB1/PRKCQ/RIPK2/IL4R/IFNG/CD80/CD81/CCL19
GOBP_REGULATION_OF_NITRIC_OXIDE_METABOLIC_PROCESS	GOBP_REGULATION_OF_NITRIC_OXIDE_METABOLIC_PROCESS	53	0.655241	1.98449	9.97896e-05	0.00178044	0.00142794	2176	tags=45%, list=11%, signal=40%	ITGB2/CX3CR1/CLEC7A/KLF2/HBB/TSPO/AGXT2/PTK2B/ICAM1/KLF4/AKT1/PTGIS/ASS1/IL1B/PTX3/TLR4/DYNLL1/JAK2/ATP2B4/IFNG/ZC3H12A/GLA/CLU/SIRPA
GOBP_REGULATION_OF_NEUTROPHIL_MIGRATION	GOBP_REGULATION_OF_NEUTROPHIL_MIGRATION	37	0.700719	1.95483	0.000101341	0.00180321	0.0014462	1982	tags=51%, list=10%, signal=46%	RAC2/IL23A/BST1/CCR7/CD74/SLAMF8/RHOH/MYD88/C5AR1/C3AR1/NCKAP1L/LBP/RHOG/MPP1/CD99/NOD2/MDK/CCL19/CCL21
GOBP_HEART_FORMATION	GOBP_HEART_FORMATION	28	-0.729471	-1.91942	0.000104512	0.00185459	0.00148741	1396	tags=29%, list=7%, signal=27%	FOXH1/FOLR1/BMPR1A/BMP2/ROBO2/AXIN2/ROBO1/DKK1
GOBP_INTERLEUKIN_10_PRODUCTION	GOBP_INTERLEUKIN_10_PRODUCTION	55	0.643804	1.96528	0.000109722	0.00194178	0.00155733	1925	tags=44%, list=10%, signal=39%	IL23A/IDO1/FCGR2B/SASH3/JAK3/HLA-DRB1/CLEC7A/SYK/HGF/IRF4/CD83/ISG15/TLR2/TYROBP/TLR4/LGALS9/CD40LG/PDCD1LG2/CD28/STAT3/LILRB1/NOD2/PYCARD/LILRA5
GOBP_MAST_CELL_ACTIVATION_INVOLVED_IN_IMMUNE_RESPONSE	GOBP_MAST_CELL_ACTIVATION_INVOLVED_IN_IMMUNE_RESPONSE	44	0.687194	2.00506	0.000110103	0.00194327	0.00155852	1639	tags=34%, list=9%, signal=31%	RAC2/IL13RA2/FGR/PTGDS/SYK/CD84/PIK3CD/LYN/CD300A/BTK/HMOX1/LGALS9/IL4R/CBL/PIK3CG
GOBP_REGULATION_OF_B_CELL_RECEPTOR_SIGNALING_PATHWAY	GOBP_REGULATION_OF_B_CELL_RECEPTOR_SIGNALING_PATHWAY	23	0.797269	2.0248	0.00011362	0.00199996	0.00160399	1614	tags=57%, list=8%, signal=52%	PTPN22/PRKCB/PRKCH/FCGR2B/FCRL3/LPXN/LYN/CD300A/PLCL2/ELF1/CD22/STAP1/CD81
GOBP_REGULATION_OF_VESICLE_MEDIATED_TRANSPORT	GOBP_REGULATION_OF_VESICLE_MEDIATED_TRANSPORT	478	0.377915	1.47026	0.000115531	0.0020239	0.00162319	2373	tags=23%, list=12%, signal=21%	RAC2/CORO1A/PTPRC/PRKCB/IL2RB/ITGB2/IL2RG/IL13RA2/FCGR2B/FCER1G/FGR/HCK/DOCK2/CCL2/CYBA/CLEC7A/CCR2/ANXA1/SYK/CD84/ITGAM/EPHA3/LYN/ACTN2/PPP3CC/PTAFR/CD300A/RAB27A/APOA1/HLA-F/GAS1/PPT1/NCKAP1L/GNAI2/MSN/IL1B/CD14/TLR2/CFTR/ZDHHC2/RAB8B/CD22/SIRPG/RAB31/RAPGEF1/HMOX1/SIRPB1/FGA/PTX3/EHD1/VTN/LGALS3/ADRA2A/PRAM1/CALR/APOA5/LGALS9/ARRB2/TNK2/EZR/MICAL1/LRRK2/LRP1/IL4R/FGG/C2/IFNG/CBL/STAP1/VAMP2/AK…
GOBP_NEGATIVE_REGULATION_OF_CELL_ADHESION	GOBP_NEGATIVE_REGULATION_OF_CELL_ADHESION	260	0.434443	1.60533	0.000115598	0.0020239	0.00162319	2823	tags=35%, list=15%, signal=30%	PTPRC/PTPN22/ARHGDIB/IDO1/FGL2/ADAMDEC1/CD74/FCGR2B/CXCL12/LILRB2/LAPTM5/JAK3/HLA-DRB1/ANXA1/LPXN/GBP1/RUNX3/AKNA/PTPN6/CD86/SPN/PLA2G2D/CD300A/IRF1/APOA1/KLF4/SEMA4D/AKT1/ASS1/GPNMB/FGL1/RND1/CLEC4G/CTLA4/PAG1/LGALS3/PRKCD/LGALS9/SPINT2/HAVCR2/JAK2/FXYD5/LRP1/IL4R/CX3CL1/IL1RN/LRRC32/PLG/PDCD1LG2/TNFSF18/ZC3H12A/BMP4/CD80/LGALS1/PTPN2/DLC1/LAX1/DUSP1/IL2RA/LILRB1/PRNP/MDK/SRC/HRG/CCL21/RCC2/PPAR…
GOBP_REGULATION_OF_MYOBLAST_FUSION	GOBP_REGULATION_OF_MYOBLAST_FUSION	16	0.843638	1.96533	0.000117335	0.00204882	0.00164318	1276	tags=44%, list=7%, signal=41%	CXCL9/CD53/CXCL10/NFATC2/EHD1/CFLAR/IL4R
GOCC_ACTIN_FILAMENT	GOCC_ACTIN_FILAMENT	104	0.537905	1.80567	0.000117959	0.0020517	0.00164549	1328	tags=20%, list=7%, signal=19%	RAC2/CORO1A/FYN/LCP1/WIPF1/HCK/ANXA1/HCLS1/AIF1/RCSD1/ACTN2/COTL1/IQGAP1/FLNA/TEK/DPYSL3/PSTPIP2/GAS7/CORO1B/EZR/SMTNL1
GOBP_REGULATION_OF_PHOSPHOLIPASE_ACTIVITY	GOBP_REGULATION_OF_PHOSPHOLIPASE_ACTIVITY	68	0.612924	1.91426	0.00011844	0.0020517	0.00164549	2434	tags=35%, list=13%, signal=31%	CCL5/ITK/AVPR1A/ANXA1/PDGFRA/CD86/PTAFR/FGFR2/C5AR1/ESR1/NTRK2/ANG/HTR2B/RGS2/LRP1/RASGRP4/LPAR1/PLCB2/TXK/ADRA1A/APOC2/GNA15/P2RY12/KIT
GOCC_TERTIARY_GRANULE_MEMBRANE	GOCC_TERTIARY_GRANULE_MEMBRANE	67	0.610217	1.91051	0.00011844	0.0020517	0.00164549	2454	tags=43%, list=13%, signal=38%	ITGB2/CD53/CYBB/FCER1G/LILRB2/CYBA/ITGAM/PTAFR/CD300A/ATP6V0C/LAIR1/KCNAB2/ITGAX/RAP2B/VAMP1/DYNLL1/SLC11A1/STOM/CLEC4D/FCAR/CD33/SERPINB6/RAB14/SIGLEC14/SIRPA/SIGLEC5/NBEAL2/CLEC12A/LILRA3
GOBP_ACUTE_INFLAMMATORY_RESPONSE	GOBP_ACUTE_INFLAMMATORY_RESPONSE	104	0.536461	1.80082	0.00012025	0.00207305	0.00166261	1668	tags=35%, list=9%, signal=32%	S100A8/CCR7/SAA1/VCAM1/FCGR2B/SAA2/DNASE1L3/CRP/ORM2/SAA4/HAMP/TREM1/PLA2G2D/ORM1/ICAM1/HLA-E/ASS1/LBP/BTK/IL1B/GSTP1/APOL2/SERPINF2/APCS/SERPINA3/PRCP/HP/CREB3L3/ITIH4/GATA3/KLKB1/SERPINA1/HPR/CD163/PIK3CG/CNR1
GOBP_RESPONSE_TO_CADMIUM_ION	GOBP_RESPONSE_TO_CADMIUM_ION	58	0.628779	1.91931	0.000120305	0.00207305	0.00166261	3073	tags=43%, list=16%, signal=36%	CYBB/MT1X/MMP9/MT1G/MT2A/MT1F/TERT/GSN/MT1M/AKT1/FOS/MT1H/CYP1A2/HMOX1/SOD2/HAAO/B2M/ALAD/KIT/JUN/ARG1/MAPK3/HSF1/GOT1/DAXX
GOBP_REGULATION_OF_LIPASE_ACTIVITY	GOBP_REGULATION_OF_LIPASE_ACTIVITY	92	0.561579	1.84935	0.000121554	0.00208543	0.00167254	2075	tags=32%, list=11%, signal=28%	CCL5/ITK/AVPR1A/ANXA1/PDGFRA/CD86/PTAFR/APOA1/FGFR2/C5AR1/ESR1/NTRK2/ANG/LIPC/HTR2B/RGS2/APOA5/LRP1/RASGRP4/LPAR1/PLCB2/APOC1/TXK/ADRA1A/PLIN5/APOC2/APOC3/NR1H3/GNA15
GOBP_POSITIVE_REGULATION_OF_INTERLEUKIN_12_PRODUCTION	GOBP_POSITIVE_REGULATION_OF_INTERLEUKIN_12_PRODUCTION	39	0.68869	1.95208	0.000121661	0.00208543	0.00167254	1913	tags=54%, list=10%, signal=49%	IL23A/IDO1/CCR7/LAPTM5/IRF8/CLEC7A/SYK/LTB/IRF1/IL16/TLR2/TLR4/LGALS9/RELA/RIPK2/CD40/IFNG/CD40LG/NOD2/MDK/CCL19
GOBP_REGULATION_OF_NEUTROPHIL_ACTIVATION	GOBP_REGULATION_OF_NEUTROPHIL_ACTIVATION	10	0.913252	1.91529	0.00012329	0.00210725	0.00169004	1636	tags=90%, list=9%, signal=82%	ITGB2/FCGR2B/SYK/ITGAM/PTAFR/CD300A/PLA2G2A/PRAM1/GRN
GOBP_CYTOKINE_PRODUCTION_INVOLVED_IN_IMMUNE_RESPONSE	GOBP_CYTOKINE_PRODUCTION_INVOLVED_IN_IMMUNE_RESPONSE	90	0.561718	1.84238	0.000123577	0.00210725	0.00169004	2937	tags=42%, list=15%, signal=36%	CD96/CD74/SASH3/LAPTM5/JAK3/IRAK3/CLEC7A/CCR2/HK1/CD226/TNFRSF1B/GPRC5B/APOA1/HLA-F/HLA-E/BTK/IL1B/HMOX1/MALT1/TLR4/BST2/GATA3/HLA-A/CD81/LILRB1/NOD2/B2M/TGFB3/TNFRSF14/TBX21/KIT/ARG1/LILRB4/IL18R1/TNF/KIR2DL4/BCL10/TGFB1
GOBP_POSITIVE_REGULATION_OF_T_CELL_MEDIATED_IMMUNITY	GOBP_POSITIVE_REGULATION_OF_T_CELL_MEDIATED_IMMUNITY	49	0.664045	1.99093	0.000124819	0.00212289	0.00170259	2004	tags=45%, list=11%, signal=40%	PTPRC/IL23A/SASH3/HLA-DRB1/HLA-DRA/CD1C/HLA-F/CD1A/HLA-E/HLA-B/IL1B/CD1B/CD1E/MALT1/IL12RB1/ZBTB1/GATA3/HLA-A/CD81/MR1/HLA-H/B2M
GOMF_PEPTIDE_RECEPTOR_ACTIVITY	GOMF_PEPTIDE_RECEPTOR_ACTIVITY	147	0.492843	1.72129	0.000129341	0.0021941	0.00175969	1907	tags=16%, list=10%, signal=15%	CX3CR1/CCR7/AVPR1A/CXCR6/NPY6R/CCR2/CXCR4/NPFFR2/CCR1/CYSLTR1/GP1BA/FPR1/CCR4/CCR5/RAMP3/CCRL2/APLNR/FPR3/PTH1R/OGFRL1/GPR37/VIPR1/AGTRAP/F2R
GOBP_CALCIUM_ION_TRANSMEMBRANE_TRANSPORT	GOBP_CALCIUM_ION_TRANSMEMBRANE_TRANSPORT	278	0.425045	1.57322	0.000132347	0.0022393	0.00179595	2425	tags=20%, list=13%, signal=18%	CORO1A/PTPRC/CXCL9/FYN/CCR7/CXCL10/FGF14/ATP2A3/CACNA2D3/LCK/PTPN6/PDE4B/GEM/LYN/GPM6A/MCOLN2/PTK2B/CXCL11/RASA3/CCR5/SLC8A1/CAPN3/SLC24A4/RAMP3/APLNR/CLIC2/HTR2B/TRPV2/ADRA2A/ITPR1/STIM2/ATP2B4/CX3CL1/P2RX7/PLN/PIK3CG/PRNP/ANK2/F2R/CCL19/ATP1A2/DRD1/CCL21/CALM1/PDE4D/BDKRB1/CACNB2/SLC24A1/CAMK2D/SLC25A25/CALM3/CCL3/THY1/P2RY12/SPG7
GOBP_APOPTOTIC_CELL_CLEARANCE	GOBP_APOPTOTIC_CELL_CLEARANCE	46	0.655138	1.92875	0.000133472	0.00225144	0.00180568	2657	tags=41%, list=14%, signal=36%	FCN1/RAC2/RHOH/CCL2/ANXA1/MARCO/FCN3/RHOG/TYROBP/RHOBTB1/LRP1/C2/RAB14/NR1H3/TGM2/AXL/TREM2/C3/RHOBTB2
GOCC_PLATELET_ALPHA_GRANULE_LUMEN	GOCC_PLATELET_ALPHA_GRANULE_LUMEN	63	0.617642	1.91721	0.000133752	0.00225144	0.00180568	2951	tags=56%, list=16%, signal=47%	FERMT3/SRGN/F13A1/HGF/ORM2/ACTN2/A1BG/TIMP1/ORM1/SERPINF2/FGA/SERPINA3/FGG/VEGFB/PLG/SERPINA1/FGB/MMRN1/ALB/ALDOA/PPBP/VEGFC/TMSB4X/HRG/PCYOX1L/CLU/TGFB3/PF4/ISLR/APP/SERPING1/KNG1/AHSG/TGFB1/ACTN1
GOBP_NEGATIVE_REGULATION_OF_VIRAL_LIFE_CYCLE	GOBP_NEGATIVE_REGULATION_OF_VIRAL_LIFE_CYCLE	23	0.793431	2.01506	0.000134264	0.00225308	0.001807	1989	tags=61%, list=10%, signal=55%	FCN1/IFITM1/FCN3/GSN/CIITA/LY6E/PTX3/TRIM31/APCS/BST2/TRIM8/TRIM25/IFITM3/IFITM2
GOBP_RESPONSE_TO_CHEMOKINE	GOBP_RESPONSE_TO_CHEMOKINE	85	0.573393	1.85257	0.000134538	0.00225308	0.001807	2555	tags=46%, list=13%, signal=40%	CCL5/CXCL9/CX3CR1/DOCK8/CCR7/CXCL10/CXCR6/CXCL12/CCL2/CCL18/CCR2/CXCR4/CCR1/PTK2B/CXCL11/PADI2/CCR4/CCR5/CXCL2/CXCL13/CCRL2/CIB1/CX3CL1/LRCH1/CCL8/CCL20/ZC3H12A/DUSP1/PPBP/CCL19/CCL21/PF4/CCL25/GPR75/TREM2/CCL3/CCL23/SLIT2/SH2B3
GOBP_NUCLEOBASE_CONTAINING_COMPOUND_TRANSPORT	GOBP_NUCLEOBASE_CONTAINING_COMPOUND_TRANSPORT	221	-0.445866	-1.6175	0.000135108	0.00225686	0.00181003	2989	tags=29%, list=16%, signal=25%	SLC35B2/EIF6/NUP43/SENP2/EIF4A3/SLC35B1/KHDRBS1/NUP153/SLC35D1/SLC35D2/SLC25A33/SLC35A5/SLC25A32/CKAP5/ENY2/PURA/SLC35B3/SMG7/CD47/CPSF3/NMD3/FMR1/ABCC4/NUP35/RRS1/SLC25A4/NUP160/SLC35D3/SEH1L/NUP37/SLU7/LTV1/XPO1/TPR/NPM1/NUP133/SSB/POM121/UPF2/SLC35E3/THOC7/PHAX/SLC28A1/THOC2/CASC3/NSUN2/SLC35A3/NUP107/RANBP2/RIOK2/PNPT1/LRPPRC/AHCTF1/NUP205/SLC29A1/TOMM20/NUP155/EIF5A2/IGF2BP2/IGF2BP3/CETN3/XP…
GOBP_MULTICELLULAR_ORGANISMAL_RESPONSE_TO_STRESS	GOBP_MULTICELLULAR_ORGANISMAL_RESPONSE_TO_STRESS	63	-0.626308	-1.9527	0.000136579	0.00227562	0.00182508	237	tags=16%, list=1%, signal=16%	RPS6KB1/SLC6A2/GJA1/DPP4/THBS4/RELN/SCN9A/PENK/CALCA/TAC1
GOBP_REGULATION_OF_GLIAL_CELL_MIGRATION	GOBP_REGULATION_OF_GLIAL_CELL_MIGRATION	15	0.85146	1.96566	0.000139993	0.00232658	0.00186595	2399	tags=80%, list=13%, signal=70%	CX3CR1/CCR2/GPR183/TIAM1/IDH2/LRP1/CX3CL1/STAP1/ATP1B2/TREM2/CCL3/P2RY12
GOBP_GRANULOCYTE_MACROPHAGE_COLONY_STIMULATING_FACTOR_PRODUCTION	GOBP_GRANULOCYTE_MACROPHAGE_COLONY_STIMULATING_FACTOR_PRODUCTION	16	0.839463	1.95561	0.000140569	0.00233024	0.00186888	1518	tags=50%, list=8%, signal=46%	IL23A/SYK/CD84/RASGRP1/LILRA2/IL1B/IL17D/CD80
GOBP_INFLAMMATORY_RESPONSE_TO_ANTIGENIC_STIMULUS	GOBP_INFLAMMATORY_RESPONSE_TO_ANTIGENIC_STIMULUS	51	0.643998	1.94053	0.00014115	0.00233282	0.00187095	1920	tags=37%, list=10%, signal=34%	CCR7/FCGR2B/HLA-DRB1/CD68/PLA2G2D/CYSLTR1/ICAM1/HLA-E/BTK/NOTCH2/GATA3/IL1RN/CD28/CD81/CNR1/IL2RA/NOD2/GPX1/KDM6B
GOBP_RESPONSE_TO_PROTOZOAN	GOBP_RESPONSE_TO_PROTOZOAN	22	0.78822	1.98353	0.000141437	0.00233282	0.00187095	2610	tags=59%, list=14%, signal=51%	GBP4/IRF8/CLEC7A/IRF4/MYD88/GBP2/GBP7/LYST/IL4R/CD40/SLC11A1/PF4/ARG1
GOBP_REACTIVE_NITROGEN_SPECIES_METABOLIC_PROCESS	GOBP_REACTIVE_NITROGEN_SPECIES_METABOLIC_PROCESS	68	0.607305	1.89671	0.000146037	0.00240263	0.00192694	1570	tags=38%, list=8%, signal=35%	ITGB2/CX3CR1/CLEC7A/NQO1/KLF2/HBB/TSPO/AGXT2/PTK2B/ICAM1/KLF4/AKT1/PTGIS/ASS1/IL1B/TLR2/CPS1/PTX3/TLR4/GCHFR/DYNLL1/JAK2/ATP2B4/IFNG/ZC3H12A/GCH1
GOMF_CHEMOKINE_BINDING	GOMF_CHEMOKINE_BINDING	29	0.745277	1.98519	0.000147236	0.0024163	0.0019379	890	tags=38%, list=5%, signal=36%	CX3CR1/ITGA4/CCR7/CXCR6/CCR2/CXCR4/CCR1/CCR4/CCR5/PLP2/CCRL2
GOBP_T_CELL_ACTIVATION_VIA_T_CELL_RECEPTOR_CONTACT_WITH_ANTIGEN_BOUND_TO_MHC_MOLECULE_ON_ANTIGEN_PRESENTING_CELL	GOBP_T_CELL_ACTIVATION_VIA_T_CELL_RECEPTOR_CONTACT_WITH_ANTIGEN_BOUND_TO_MHC_MOLECULE_ON_ANTIGEN_PRESENTING_CELL	10	0.91065	1.90983	0.000153248	0.00250569	0.0020096	1708	tags=100%, list=9%, signal=91%	HLA-DMB/FGL2/ITGAL/APBB1IP/ICAM1/LGALS3/LGALS9/HAVCR2/CD81/LILRB1
GOBP_NEGATIVE_REGULATION_OF_NATURAL_KILLER_CELL_MEDIATED_IMMUNITY	GOBP_NEGATIVE_REGULATION_OF_NATURAL_KILLER_CELL_MEDIATED_IMMUNITY	19	0.815986	1.9735	0.000153449	0.00250569	0.0020096	1708	tags=63%, list=9%, signal=58%	CD96/KLRD1/HLA-F/SERPINB9/HLA-E/HLA-B/LGALS9/ARRB2/KLRC1/HAVCR2/HLA-A/LILRB1
GOBP_REGULATION_OF_RESPIRATORY_BURST	GOBP_REGULATION_OF_RESPIRATORY_BURST	13	0.867362	1.91859	0.000158087	0.00257502	0.00206519	1636	tags=62%, list=9%, signal=56%	RAC2/IGHA1/SLAMF8/CLEC7A/LBP/RPS19/DUSP10/GRN
GOCC_LYSOSOMAL_LUMEN	GOCC_LYSOSOMAL_LUMEN	89	0.569377	1.85928	0.000158864	0.00258125	0.0020702	2724	tags=33%, list=14%, signal=28%	CTSK/CD74/CTSS/DCN/IFI30/VCAN/SDC3/PPT1/MAN2B1/RNASET2/LUM/CD1E/NAAA/GM2A/HPSE/ASAH1/LGMN/NPC2/PSAP/GLA/CTSB/PRELP/GPC1/GYG1/GALC/OGN/BGN/ACP2/GC
GOMF_GLYCOSAMINOGLYCAN_BINDING	GOMF_GLYCOSAMINOGLYCAN_BINDING	205	0.458745	1.66468	0.0001605	0.00259997	0.00208521	2605	tags=31%, list=14%, signal=27%	SELL/PTPRC/IGHM/CXCL10/SAA1/LXN/SPOCK2/SMOC2/CD44/DCN/HK1/VCAN/PLA2G2D/CCDC80/LGR6/FGFR2/CXCL11/GPNMB/TLR2/FGFRL1/ANG/LTBP2/DPYSL3/CXCL13/PTN/LIPC/MMP7/CRISPLD2/VTN/APOA5/HABP2/STAB1/TGFBR3/SELP/SULF2/SERPINA10/VEGFB/CCL8/ENG/BMP4/RPL29/APOE/SFRP1/PRNP/NOD2/MDK/SMOC1/HRG/PRELP/PRG2/STAB2/PCOLCE/PF4/LYVE1/TREM2/CCL23/PTPRS/APP/SERPIND1/SLIT2/HAPLN3/BGN/KNG1
GOBP_TOLL_LIKE_RECEPTOR_4_SIGNALING_PATHWAY	GOBP_TOLL_LIKE_RECEPTOR_4_SIGNALING_PATHWAY	34	0.70286	1.94213	0.00016081	0.00259997	0.00208521	2085	tags=44%, list=11%, signal=39%	PTPN22/ITGB2/ITGAM/LYN/TNFAIP3/LILRA2/LBP/NFKBIA/CD14/TLR4/RIPK2/MFHAS1/NR1H3/LY96/WDFY1
GOBP_REGULATION_OF_SUPEROXIDE_METABOLIC_PROCESS	GOBP_REGULATION_OF_SUPEROXIDE_METABOLIC_PROCESS	28	0.735862	1.95158	0.000165722	0.00267277	0.0021436	982	tags=43%, list=5%, signal=41%	ITGB2/BST1/FBLN5/CRP/CLEC7A/SYK/ITGAM/HVCN1/GNAI2/GSTP1/TYROBP/PRKCD
GOBP_DEVELOPMENTAL_INDUCTION	GOBP_DEVELOPMENTAL_INDUCTION	32	-0.717531	-1.94312	0.000168943	0.00271803	0.00217989	1347	tags=19%, list=7%, signal=17%	SOX9/HIPK2/BMP2/ROBO2/ROBO1/DKK1
GOBP_REGULATION_OF_CATION_TRANSMEMBRANE_TRANSPORT	GOBP_REGULATION_OF_CATION_TRANSMEMBRANE_TRANSPORT	311	0.409909	1.53691	0.000171989	0.00276025	0.00221375	2563	tags=22%, list=13%, signal=20%	CORO1A/CXCL9/FYN/CXCL10/MMP9/CTSS/FGF14/CCL2/CCR2/PTPN6/PDE4B/GEM/LYN/HAMP/ACTN2/RASGRF1/PTK2B/CRHBP/FXYD1/FLNA/CXCL11/KCNAB2/FXYD6/MEF2C/SLC8A1/CAPN3/SLC31A2/RAMP3/APLNR/CLIC2/FGF12/RGS2/ADRA2A/CNIH3/STIM2/DAPK1/ATP2B4/FXYD5/CX3CL1/IFNG/VAMP2/PLN/PIK3CG/STOM/PRNP/ATP1B2/ANK2/F2R/TMSB4X/ATP1A2/DRD1/ANK3/FHL1/CALM1/PDE4D/BDKRB1/TWIST1/CACNB2/CAMK2D/CALM3/KCNN2/TREM2/THY1/SHANK3/RANGRF/APP/RGN/TCIR…
GOBP_POSITIVE_REGULATION_OF_CALCIUM_ION_TRANSPORT	GOBP_POSITIVE_REGULATION_OF_CALCIUM_ION_TRANSPORT	110	0.534836	1.80983	0.000177638	0.00284271	0.00227989	2489	tags=28%, list=13%, signal=25%	CCL5/CXCL9/CXCL10/CD4/CXCL12/FGF14/CCL2/CCR1/TSPO/CXCL11/LILRA2/CAPN3/RAMP3/APLNR/LGALS3/TRPV2/ARRB2/STIM2/CX3CL1/P2RX7/ANK2/F2R/LILRA5/DRD1/CALM1/BDKRB1/CACNB2/CALM3/CCL3/THY1/RGN
GOMF_NUCLEOTIDE_RECEPTOR_ACTIVITY	GOMF_NUCLEOTIDE_RECEPTOR_ACTIVITY	21	0.798176	1.9996	0.000177995	0.00284271	0.00227989	1503	tags=38%, list=8%, signal=35%	GPR171/P2RY13/P2RY8/PTAFR/P2RY14/P2RY10/P2RX7/P2RX1
GOBP_DETOXIFICATION_OF_INORGANIC_COMPOUND	GOBP_DETOXIFICATION_OF_INORGANIC_COMPOUND	16	0.836301	1.94824	0.000180067	0.0028688	0.00230081	704	tags=38%, list=4%, signal=36%	MT1X/MT1G/MT2A/MT1F/MT1M/MT1H
GOBP_NEGATIVE_REGULATION_OF_VIRAL_ENTRY_INTO_HOST_CELL	GOBP_NEGATIVE_REGULATION_OF_VIRAL_ENTRY_INTO_HOST_CELL	20	0.801688	1.98613	0.000180533	0.00286924	0.00230117	1989	tags=65%, list=10%, signal=58%	FCN1/IFITM1/FCN3/GSN/CIITA/LY6E/PTX3/TRIM31/APCS/TRIM8/TRIM25/IFITM3/IFITM2
GOBP_DENDRITIC_CELL_ANTIGEN_PROCESSING_AND_PRESENTATION	GOBP_DENDRITIC_CELL_ANTIGEN_PROCESSING_AND_PRESENTATION	14	0.86027	1.93508	0.000185056	0.002934	0.00235311	1982	tags=86%, list=10%, signal=77%	CCR7/FGL2/CD74/FCGR2B/HLA-DRB1/CD68/CLEC4A/HLA-DRA/SLC11A1/NOD2/CCL19/CCL21
GOBP_HOMOPHILIC_CELL_ADHESION_VIA_PLASMA_MEMBRANE_ADHESION_MOLECULES	GOBP_HOMOPHILIC_CELL_ADHESION_VIA_PLASMA_MEMBRANE_ADHESION_MOLECULES	161	-0.475505	-1.67219	0.000185574	0.00293512	0.00235401	2596	tags=20%, list=14%, signal=18%	PCDHGB5/CEACAM1/PVR/CDH13/NPTN/PCDHA1/CDH9/CELSR1/PCDHB12/MPZL2/PCDH9/PCDHB6/ITGB1/PCDHAC2/PCDHGA2/CDH6/CADM1/PCDHB16/PCDHB5/CELSR2/PCDHB10/PCDHB13/FAT1/PCDH20/DSC2/TRO/PCDHB14/ROBO2/PCDHB3/ROBO1/MYOT/DSG2/CEACAM6
GOBP_REGULATION_OF_LYMPHOCYTE_CHEMOTAXIS	GOBP_REGULATION_OF_LYMPHOCYTE_CHEMOTAXIS	22	0.78517	1.97585	0.000189732	0.00299365	0.00240094	836	tags=41%, list=4%, signal=39%	KLRK1/CCL5/CXCL10/CXCL14/CCL2/CCR2/PTK2B/PADI2/CXCL13
GOBP_REGULATION_OF_REGULATED_SECRETORY_PATHWAY	GOBP_REGULATION_OF_REGULATED_SECRETORY_PATHWAY	130	0.504682	1.72195	0.000191253	0.00300499	0.00241004	1772	tags=22%, list=9%, signal=20%	RAC2/PRKCB/ITGB2/IL13RA2/FCGR2B/FGR/CCR2/SYK/CD84/ITGAM/LYN/PTAFR/CD300A/RAB27A/HLA-F/GNAI2/HMOX1/ADRA2A/PRAM1/LGALS9/MICAL1/LRRK2/IL4R/P2RX1/CNR1/STX4/SYT11/ADRA1A
GOBP_POSITIVE_REGULATION_OF_NITRIC_OXIDE_METABOLIC_PROCESS	GOBP_POSITIVE_REGULATION_OF_NITRIC_OXIDE_METABOLIC_PROCESS	36	0.713824	1.9799	0.000191368	0.00300499	0.00241004	1343	tags=42%, list=7%, signal=39%	ITGB2/CLEC7A/KLF2/HBB/AGXT2/PTK2B/ICAM1/KLF4/AKT1/ASS1/IL1B/PTX3/TLR4/JAK2/IFNG
GOBP_POSITIVE_REGULATION_OF_DNA_BINDING_TRANSCRIPTION_FACTOR_ACTIVITY	GOBP_POSITIVE_REGULATION_OF_DNA_BINDING_TRANSCRIPTION_FACTOR_ACTIVITY	256	0.430769	1.59317	0.000193404	0.00302969	0.00242985	3430	tags=33%, list=18%, signal=27%	S100A8/PRKCB/ITGB2/CX3CR1/S100A12/PRKCH/CARD16/IRAK3/HCLS1/TRIM22/AIM2/BEX1/MYD88/ICAM1/AKT1/ESR1/BTK/IL1B/TLR2/TRAF1/CAPN3/TRIM31/MALT1/TLR4/CFLAR/LGALS9/IL1RAP/RELA/JAK2/PRKCQ/RIPK2/CIB1/TRIM68/CX3CL1/CD40/TRIM8/TRIM25/CD40LG/TNFSF18/NFKB1/CD200/CRTC3/STAT3/TRADD/TERF2IP/TRIM38/NOD2/PYCARD/LPAR5/TRIM14/RBCK1/S100A9/TAF12/CLU/RIPK3/TAB2/IL18RAP/NFAM1/RPS6KA5/KIT/APP/ARHGEF2/NFKB2/AR/HDAC4/UBC/TR…
GOBP_LYMPHOCYTE_COSTIMULATION	GOBP_LYMPHOCYTE_COSTIMULATION	58	0.620321	1.89349	0.000194154	0.00303418	0.00243345	2659	tags=53%, list=14%, signal=46%	KLRK1/FYN/CCR7/CD3E/LILRB2/TNFSF13B/BTLA/LCK/PTPN6/CD86/LYN/AKT1/CD5/CTLA4/TNFSF14/CD40LG/PDCD1LG2/CD80/CD28/LGALS1/CD81/VAV1/ICOS/SRC/CCL19/CCL21/TNFRSF14/MAP3K8/EFNB1/CSK/LILRB4
GOBP_STRESS_ACTIVATED_PROTEIN_KINASE_SIGNALING_CASCADE	GOBP_STRESS_ACTIVATED_PROTEIN_KINASE_SIGNALING_CASCADE	257	0.433763	1.60358	0.000197065	0.00306798	0.00246056	3225	tags=35%, list=17%, signal=29%	PTPN22/CCR7/ARHGEF6/RASSF2/PTGER4/FCGR2B/CLEC7A/FAS/SYK/HGF/LYN/MLKL/RASGRP1/MYD88/PTK2B/AKR1B1/AKT1/SPI1/STK4/ARL6IP5/IL1B/GSTP1/TRAF1/MAP3K3/SERPINF2/RAPGEF1/IL26/CD27/MAP4K1/GADD45B/TLR4/CCDC88C/LGALS9/IGBP1/EZR/RIPK2/TRAF3/GADD45G/IRAK4/DUSP10/SLAMF1/HAND2/CD40LG/HIPK3/ZC3H12A/NFKB1/MDFIC/RELL1/FOXO1/DUSP1/SFRP1/NOD2/PTPN1/PYCARD/CYLD/MFHAS1/CCL19/AMBP/CCM2/PER1/CCL21/DBNL/TAB2/SIRPA/TNIK/NCO…
GOBP_NEGATIVE_REGULATION_OF_SMOOTH_MUSCLE_CELL_PROLIFERATION	GOBP_NEGATIVE_REGULATION_OF_SMOOTH_MUSCLE_CELL_PROLIFERATION	41	0.66808	1.91963	0.000197254	0.00306798	0.00246056	2440	tags=39%, list=13%, signal=34%	AIF1/KLF4/TNFAIP3/GSTP1/MEF2C/IGFBP3/ANG/HMOX1/SOD2/NDRG2/IFNG/IGFBP5/TGFB3/IL15/PDCD4/OGN
GOMF_PEPTIDE_BINDING	GOMF_PEPTIDE_BINDING	286	0.422622	1.56488	0.000199197	0.00309086	0.00247891	1975	tags=22%, list=10%, signal=20%	ITM2A/ITGB2/HLA-DRB5/CD74/FCGR2B/AVPR1A/HLA-DPA1/LILRB2/HLA-DRB1/HLA-DPB1/TAP1/HLA-DQA1/MARCO/NPFFR2/ITGAM/ERAP2/HLA-DRA/CD1C/APOA1/HLA-F/CRHBP/C1QA/CD1A/HLA-E/HLA-B/LBP/NFKBIA/CD14/GSTP1/TLR2/HLA-DQB1/CD1B/ANG/HLA-C/TAPBP/RAMP3/CD1E/CST3/NGFR/TLR4/AP2M1/CALR/PFDN5/PTH1R/RELA/LRP1/TAP2/HLA-A/CLEC4M/GPR37/TMEM158/VIPR1/APOE/CRIP1/GHR/PRNP/NOD2/TLR1/INHBA/HLA-H/TRHDE/PPIB
GOBP_CD8_POSITIVE_ALPHA_BETA_T_CELL_ACTIVATION	GOBP_CD8_POSITIVE_ALPHA_BETA_T_CELL_ACTIVATION	26	0.754189	1.97241	0.000201392	0.00311753	0.0025003	1708	tags=46%, list=9%, signal=42%	PTPN22/RUNX3/CLEC4A/TNFSF8/IRF1/BCL2/HLA-E/NCKAP1L/WDFY4/EOMES/HLA-A/LILRB1
GOBP_STRESS_RESPONSE_TO_METAL_ION	GOBP_STRESS_RESPONSE_TO_METAL_ION	17	0.834132	1.9612	0.00020372	0.00314613	0.00252324	704	tags=35%, list=4%, signal=34%	MT1X/MT1G/MT2A/MT1F/MT1M/MT1H
GOBP_TYROSINE_PHOSPHORYLATION_OF_STAT_PROTEIN	GOBP_TYROSINE_PHOSPHORYLATION_OF_STAT_PROTEIN	77	0.576156	1.84752	0.000204384	0.00314895	0.0025255	1724	tags=23%, list=9%, signal=21%	CCL5/IL23A/IL24/FYN/JAK3/HCLS1/CSF1R/LYN/FLT3/JAK2/CD40/IFNG/TNFSF18/PTPN2/STAT3/HPX/SOCS3/GHR
GOBP_CYTOKINE_PRODUCTION_INVOLVED_IN_INFLAMMATORY_RESPONSE	GOBP_CYTOKINE_PRODUCTION_INVOLVED_IN_INFLAMMATORY_RESPONSE	48	0.653723	1.95888	0.000206672	0.00317673	0.00254778	3067	tags=50%, list=16%, signal=42%	GBP5/NLRC3/CLEC7A/MEFV/MYD88/ADCY7/ALOX5/TLR4/IL17D/GPSM3/ZC3H12A/STAT3/NOD2/PYCARD/PER1/PPARA/SIRPA/PDCD4/LILRB4/TNF/PLD3/CD6/PLD4/CUEDC2
GOMF_PROTEIN_TYROSINE_KINASE_ACTIVITY	GOMF_PROTEIN_TYROSINE_KINASE_ACTIVITY	134	0.50642	1.74636	0.000207889	0.00318796	0.00255678	2434	tags=27%, list=13%, signal=24%	ITK/FYN/FGR/HCK/EFEMP1/JAK3/PDGFRA/LCK/SYK/CSF1R/EPHA3/LYN/SLA/PTK2B/FGFR2/BTK/NTRK2/TEK/FGFRL1/ZAP70/PRKCD/TNK2/FLT3/JAK2/RIPK2/MAP2K6/HIPK3/TXK/DYRK2/TYK2/SRC/KDR/EPHB6/AXL/DYRK1A/KIT
GOBP_MYELOID_CELL_DEVELOPMENT	GOBP_MYELOID_CELL_DEVELOPMENT	58	0.618115	1.88676	0.000220359	0.00337128	0.00270381	2668	tags=40%, list=14%, signal=34%	EVI2B/FLI1/PTPN6/PIP4K2A/KLF2/NCKAP1L/TLR2/TYROBP/NOTCH2/WASF2/GPR68/ATP6AP1/LILRB1/SRC/ARID4A/LYAR/LRRK1/KIT/APP/RPS6/SH2B3/ALAS2/FBN1
GOBP_REGULATION_OF_TOLL_LIKE_RECEPTOR_SIGNALING_PATHWAY	GOBP_REGULATION_OF_TOLL_LIKE_RECEPTOR_SIGNALING_PATHWAY	64	0.609009	1.8896	0.000231237	0.00352947	0.00283068	2085	tags=36%, list=11%, signal=32%	PTPN22/FCRL3/IRAK3/CYBA/LYN/IRF4/CD300A/IRF1/ESR1/TNFAIP3/LILRA2/LBP/BIRC3/CD14/TLR2/TLR4/ARRB2/NOD2/TLR1/MFHAS1/NR1H3/LY96/WDFY1
GOBP_NIK_NF_KAPPAB_SIGNALING	GOBP_NIK_NF_KAPPAB_SIGNALING	163	0.472044	1.66506	0.000237828	0.00362162	0.00290458	3192	tags=36%, list=17%, signal=30%	IL23A/PTPN22/C1QTNF3/RASSF2/NLRC3/LAPTM5/PSMB9/CD86/AKT1/PSMB8/BIRC3/IL1B/NFKBIA/CD14/TLR2/CD27/MALT1/TLR4/NLRP12/TNFSF14/CALR/LITAF/LGALS9/RELA/HAVCR2/REL/ZC3H12A/DICER1/PSME1/TLR7/PSME2/TRADD/TERF2IP/NOD2/PPP4C/HDAC7/CYLD/CCL19/RBCK1/TMSB4X/IKBKE/RIPK3/NR3C2/TREM2/PDCD4/APP/NFKB2/RELB/NOL3/IL18R1/TNF/TNFRSF10B/AGER/RPS3/LIME1/HMGB1/PSMB6/IFI35/BCL3
GOBP_CORNIFICATION	GOBP_CORNIFICATION	108	-0.517999	-1.73845	0.00023949	0.00363846	0.00291809	640	tags=14%, list=3%, signal=13%	JUP/TCHH/PERP/ST14/SPINK6/KRT8/PKP4/DSP/DSC2/PI3/KRT7/KRT23/DSG2/KRT19/KRT20
GOBP_MACROPHAGE_CHEMOTAXIS	GOBP_MACROPHAGE_CHEMOTAXIS	36	0.70652	1.95964	0.000246068	0.00372975	0.00299131	2947	tags=56%, list=15%, signal=47%	CCL5/SAA1/SLAMF8/CCL2/CSF1R/PTK2B/C5AR1/C3AR1/LGALS3/DDT/STAP1/MST1/TNFSF18/MDK/CCL3/MIF/MAPK3/RARRES2/CXCL17/CMKLR1
GOBP_REGULATION_OF_HEART_MORPHOGENESIS	GOBP_REGULATION_OF_HEART_MORPHOGENESIS	11	-0.885983	-1.89125	0.000254834	0.00385274	0.00308995	496	tags=36%, list=3%, signal=35%	BMP2/ROBO2/ROBO1/DKK1
GOCC_PRERIBOSOME	GOCC_PRERIBOSOME	67	-0.606509	-1.89918	0.00025538	0.00385274	0.00308995	3069	tags=52%, list=16%, signal=44%	WDR37/UTP14C/XRCC5/BMS1/NSA2/LAS1L/UTP20/RPF1/FTSJ3/MDN1/EIF6/UTP6/RIOK3/NOP56/NOP58/RRP9/ZNF622/RRP1B/EMG1/HEATR1/RRS1/SRFBP1/MAK16/WDR3/LTV1/RIOK1/MPHOSPH10/UTP18/UTP23/RIOK2/WDR36/RRP15/WDR12/DCAF13/PRKDC
GOCC_CYTOSOLIC_RIBOSOME	GOCC_CYTOSOLIC_RIBOSOME	98	0.535335	1.79031	0.000255947	0.00385274	0.00308995	3488	tags=50%, list=18%, signal=41%	RPS15/ISG15/RPS26/RPS9/RPL21/RPL13/RPS19/RPS29/RPL18/RPS11/RPL28/RPL35/RPL39L/RPL18A/RPS5/RPL13A/RPL29/RPL7A/RPL41/RPS4X/RPLP2/RPLP1/RPS28/RPL3/RPS8/RPL24/RPL11/RPL36AL/RPL10/RPL12/RPS6/RPL10A/RPS27/RPS2/RPS15A/RPS16/UBA52/RPS17/RPS3/RPL6/RPL4/RPL37/PPARGC1A/RPL34/RPL8/RPS25/RPL37A/RPL19/RPL9
GOBP_ICOSANOID_METABOLIC_PROCESS	GOBP_ICOSANOID_METABOLIC_PROCESS	108	0.52324	1.76217	0.00025905	0.0038905	0.00312023	2286	tags=31%, list=12%, signal=28%	CD74/AVPR1A/ANXA1/PTGDS/SYK/CYP2C8/CYP2B6/CYP4A11/HPGD/ALOX5AP/GGTA1/PTGIS/ALOX5/DPEP2/IL1B/CYP1A2/GSTP1/TLR2/AKR1C4/CYP4F22/MGLL/PTGS1/CYP2E1/ABCC1/GGT5/GPX1/TBXAS1/LTA4H/FABP5/CYP2C18/PLA2G10/PTGR1/EPHX2/MAPKAPK2
GOCC_SPECIFIC_GRANULE_MEMBRANE	GOCC_SPECIFIC_GRANULE_MEMBRANE	84	0.561391	1.8062	0.000271511	0.00406831	0.00326284	2486	tags=38%, list=13%, signal=33%	ITGB2/CD53/CYBB/BST1/ITGAL/CYBA/ITGAM/HVCN1/TNFRSF1B/C3AR1/LAIR1/KCNAB2/STK10/SLCO4C1/SLC44A2/RAP2B/VAMP1/PLAUR/P2RX1/HMOX2/RAB37/ATP8A1/STOM/CLEC4D/FCAR/CD33/MLEC/CMTM6/CLEC12A/SLC27A2/LILRA3/PTPRJ
GOBP_POSITIVE_REGULATION_OF_PRODUCTION_OF_MOLECULAR_MEDIATOR_OF_IMMUNE_RESPONSE	GOBP_POSITIVE_REGULATION_OF_PRODUCTION_OF_MOLECULAR_MEDIATOR_OF_IMMUNE_RESPONSE	89	0.560482	1.83023	0.000273357	0.00408662	0.00327752	1753	tags=31%, list=9%, signal=29%	PTPRC/PTPN22/CD74/SASH3/LAPTM5/CLEC7A/HK1/PGC/CD226/GPRC5B/HLA-F/IL33/HLA-E/IL1B/CD244/MALT1/TLR4/IL4R/GATA3/CD40/HLA-A/CD28/CD81/XBP1/HPX/STX4/LILRB1/NOD2
GOBP_TRNA_PROCESSING	GOBP_TRNA_PROCESSING	106	-0.523703	-1.74305	0.000277389	0.00413375	0.00331532	4964	tags=53%, list=26%, signal=39%	POP5/GTPBP3/MTO1/C2orf49/QTRT1/TSEN54/THUMPD3/TPRKB/TRMT5/POP1/RPP14/MOCS3/ELP4/DTWD1/TRMT112/AARS2/ADAT2/ZBTB8OS/KTI12/THUMPD2/TSEN15/GRSF1/LCMT2/CDK5RAP1/TRUB1/METTL2A/PTCD1/CPSF4/CLP1/TRNT1/CTU2/FAM98B/OSGEPL1/NAT10/TRIT1/DUS1L/METTL2B/RPUSD4/TYW3/TSEN2/TRMT12/METTL1/SSB/DTWD2/METTL6/TRMT11/TRMT6/ELP2/NSUN2/TRMT61B/RPP40/TYW1/DDX1/DUS4L/PUS7/TARBP1
GOBP_REGULATION_OF_CELL_FATE_SPECIFICATION	GOBP_REGULATION_OF_CELL_FATE_SPECIFICATION	13	-0.867675	-1.957	0.000277772	0.00413375	0.00331532	709	tags=38%, list=4%, signal=37%	BMPR1A/FGF2/SFRP2/ESRP1/DKK1
GOBP_LEUKOCYTE_MIGRATION_INVOLVED_IN_INFLAMMATORY_RESPONSE	GOBP_LEUKOCYTE_MIGRATION_INVOLVED_IN_INFLAMMATORY_RESPONSE	18	0.822044	1.96883	0.000279081	0.00414381	0.00332339	2106	tags=56%, list=11%, signal=49%	S100A8/ITGB2/SLAMF8/LBP/ALOX5/PTN/CX3CL1/MDK/S100A9/TRIM55
GOBP_POSITIVE_REGULATION_OF_NATURAL_KILLER_CELL_MEDIATED_IMMUNITY	GOBP_POSITIVE_REGULATION_OF_NATURAL_KILLER_CELL_MEDIATED_IMMUNITY	29	0.730997	1.94715	0.000281946	0.00417688	0.00334991	1258	tags=34%, list=7%, signal=32%	KLRK1/SLAMF6/KLRD1/CD226/RASGRP1/SH2D1A/HLA-F/HLA-E/NCR3/SH2D1B
GOBP_REGULATION_OF_SUPEROXIDE_ANION_GENERATION	GOBP_REGULATION_OF_SUPEROXIDE_ANION_GENERATION	20	0.788211	1.95274	0.000288893	0.00427014	0.00342471	982	tags=50%, list=5%, signal=47%	ITGB2/CRP/CLEC7A/SYK/ITGAM/HVCN1/GNAI2/GSTP1/TYROBP/PRKCD
GOBP_LEUKOCYTE_AGGREGATION	GOBP_LEUKOCYTE_AGGREGATION	13	0.85162	1.88377	0.000293847	0.00432778	0.00347093	975	tags=69%, list=5%, signal=66%	RAC2/S100A8/CD44/JAM2/SEMA4D/MSN/IL1B/STK10/ZAP70
GOBP_RESPIRATORY_BURST_INVOLVED_IN_DEFENSE_RESPONSE	GOBP_RESPIRATORY_BURST_INVOLVED_IN_DEFENSE_RESPONSE	10	0.90036	1.88825	0.000294115	0.00432778	0.00347093	1639	tags=80%, list=9%, signal=73%	SLAMF8/HCK/PIK3CD/LBP/RPS19/DUSP10/GRN/PIK3CG
GOBP_ACTIVATION_OF_PHOSPHOLIPASE_C_ACTIVITY	GOBP_ACTIVATION_OF_PHOSPHOLIPASE_C_ACTIVITY	32	0.710709	1.93339	0.000297761	0.00437161	0.00350608	2399	tags=44%, list=13%, signal=38%	ITK/AVPR1A/CD86/C5AR1/NTRK2/ANG/HTR2B/RASGRP4/LPAR1/PLCB2/TXK/ADRA1A/GNA15/P2RY12
GOBP_CELL_RECOGNITION	GOBP_CELL_RECOGNITION	158	0.480231	1.68708	0.000309483	0.00453355	0.00363596	1982	tags=23%, list=10%, signal=21%	FCN1/TRBC1/IGHA1/IGHM/PRF1/DOCK8/CCR7/EMB/DOCK2/CRP/CLEC7A/CXCR4/CD226/HVCN1/VCAN/EPHA3/FCN3/LBP/PECAM1/MSN/CD5/PTX3/LGALS3/FOLR2/ST6GALNAC6/HAVCR2/NCR3/CLEC4M/CD81/CNR1/ALDOA/NEXN/C4BPA/IGKC/CCL19/CCL21
GOBP_TUMOR_NECROSIS_FACTOR_MEDIATED_SIGNALING_PATHWAY	GOBP_TUMOR_NECROSIS_FACTOR_MEDIATED_SIGNALING_PATHWAY	161	0.477396	1.67953	0.000324544	0.00474356	0.0038044	1948	tags=28%, list=10%, signal=25%	CASP1/CARD16/LAPTM5/TNFSF13B/FAS/PSMB9/SYK/TNFSF8/LTB/AIM2/TNFRSF1B/STAT1/APOA1/PTK2B/TNFRSF9/PSMB8/TNFAIP3/BIRC3/NFKBIA/GSTP1/TRAF1/TNFRSF17/CD27/CASP8/TNFSF14/CARD8/RELA/JAK2/CCDC3/TRAF3/CASP4/CD40/TP53/CD40LG/TNFSF18/PTPN2/PSME1/PSME2/TRADD/TNFSF12/PYCARD/TNFRSF13B/CYLD/RBCK1/TMSB4X
GOBP_REGULATION_OF_LEUKOCYTE_ADHESION_TO_VASCULAR_ENDOTHELIAL_CELL	GOBP_REGULATION_OF_LEUKOCYTE_ADHESION_TO_VASCULAR_ENDOTHELIAL_CELL	28	0.717938	1.90405	0.000328486	0.00479048	0.00384203	2779	tags=54%, list=15%, signal=46%	ITGB2/ITGA4/CXCL12/ETS1/PTAFR/ICAM1/KLF4/ALOX5/RELA/SELP/MDK/CCL21/CCL25/CCL28/TNF
GOBP_REGULATION_OF_RELEASE_OF_SEQUESTERED_CALCIUM_ION_INTO_CYTOSOL	GOBP_REGULATION_OF_RELEASE_OF_SEQUESTERED_CALCIUM_ION_INTO_CYTOSOL	71	0.595686	1.87852	0.000331737	0.00482714	0.00387143	2391	tags=32%, list=13%, signal=28%	CORO1A/CXCL9/CXCL10/PTPN6/LYN/PTK2B/CXCL11/SLC8A1/CAPN3/APLNR/CLIC2/CX3CL1/PLN/ANK2/F2R/ATP1A2/DRD1/CALM1/PDE4D/BDKRB1/CAMK2D/CALM3/THY1
GOBP_REGULATION_OF_MONOCYTE_CHEMOTAXIS	GOBP_REGULATION_OF_MONOCYTE_CHEMOTAXIS	26	0.743563	1.94462	0.000334582	0.00485774	0.00389597	1677	tags=50%, list=9%, signal=46%	CCL5/CXCL10/SLAMF8/CXCL12/CCR2/AIF1/LYN/CCR1/PLA2G7/LGMN/CREB3/TNFSF18/DUSP1
GOBP_REGULATION_OF_MAST_CELL_ACTIVATION	GOBP_REGULATION_OF_MAST_CELL_ACTIVATION	38	0.677371	1.91136	0.000335967	0.00486706	0.00390345	1276	tags=29%, list=7%, signal=27%	RAC2/IL13RA2/FGR/SYK/CD84/CD226/LYN/CD300A/HMOX1/LGALS9/IL4R
GOBP_NEGATIVE_REGULATION_OF_I_KAPPAB_KINASE_NF_KAPPAB_SIGNALING	GOBP_NEGATIVE_REGULATION_OF_I_KAPPAB_KINASE_NF_KAPPAB_SIGNALING	41	0.657431	1.88903	0.000344229	0.00497575	0.00399061	2659	tags=39%, list=14%, signal=34%	NLRC3/RHOH/STAT1/ESR1/TNFAIP3/GSTP1/CASP8/NLRP12/CARD8/TRIM59/ZC3H12A/PYCARD/USP10/PER1/TANK/LILRB4
GOBP_POSITIVE_REGULATION_OF_MONOCYTE_CHEMOTAXIS	GOBP_POSITIVE_REGULATION_OF_MONOCYTE_CHEMOTAXIS	20	0.784497	1.94354	0.000348982	0.00503333	0.0040368	1484	tags=50%, list=8%, signal=46%	CCL5/CXCL10/CXCL12/CCR2/AIF1/CCR1/PLA2G7/LGMN/CREB3/TNFSF18
GOBP_REGULATION_OF_INOSITOL_PHOSPHATE_BIOSYNTHETIC_PROCESS	GOBP_REGULATION_OF_INOSITOL_PHOSPHATE_BIOSYNTHETIC_PROCESS	14	0.847591	1.90656	0.000357725	0.00514407	0.00412561	1122	tags=36%, list=6%, signal=34%	PLEK/PTAFR/PTK2B/CD244/PTH1R
GOBP_RRNA_METABOLIC_PROCESS	GOBP_RRNA_METABOLIC_PROCESS	206	-0.427065	-1.53944	0.000358231	0.00514407	0.00412561	3607	tags=33%, list=19%, signal=27%	ZNHIT3/NSUN5/NSUN4/RRP8/GAR1/DKC1/RPL7/ZNHIT6/EXOSC8/DIS3/WDR43/EXOSC9/MDN1/MRPL1/EIF6/NOP2/EXOSC7/EIF4A3/NAT10/UTP6/RIOK3/NOP56/WDR55/DDX21/NOP58/RRP9/CHD7/USP36/NSUN5P2/DDX10/RPUSD4/RRP1B/PA2G4/NHP2/RPF2/EMG1/HEATR1/SHQ1/RRS1/PELO/SRFBP1/WDR75/MAK16/WDR3/SBDS/EXOSC3/RIOK1/MPHOSPH10/RPL7L1/DDX52/UTP18/PIN4/UTP23/DDX18/UTP15/RIOK2/WDR36/RRP15/TRMT61B/RPP40/GTPBP4/METTL5/TFB2M/NOL11/WDR12/ESF1/DCA…
GOCC_TERTIARY_GRANULE_LUMEN	GOCC_TERTIARY_GRANULE_LUMEN	55	0.620545	1.89428	0.000368974	0.00528674	0.00424003	2186	tags=42%, list=11%, signal=37%	LYZ/CHIT1/MMP9/CTSS/CFP/PTPN6/HBB/ORM1/LRG1/CNN2/CST3/PTX3/ASAH1/HP/TIMP2/PGM1/ALDOA/PPBP/LTA4H/B2M/CTSH/DBNL/YPEL5
GOBP_MITOCHONDRIAL_GENE_EXPRESSION	GOBP_MITOCHONDRIAL_GENE_EXPRESSION	142	-0.48325	-1.68544	0.000370223	0.00529052	0.00424307	4978	tags=49%, list=26%, signal=37%	MRPS28/MRPS18B/MTO1/MRPL22/MRPS17/TRMT5/MRPS5/MRPL11/MRPL14/RARS2/MRPS24/MRPS18C/MRPL35/ERAL1/MRPL16/AARS2/MRPS7/MRPL18/NGRN/TFB1M/QRSL1/MRPS22/CDK5RAP1/TSFM/TRNT1/MRPL32/MRPL27/MRPL1/MRPL21/MRPS33/YARS2/FASTKD5/TRIT1/MRPL39/SLC25A33/MRPS25/FASTKD3/MRPL51/MRPL42/MRPS16/MRPL2/FASTKD2/PRKAA1/RPUSD4/DARS2/MTIF2/MRPS36/TACO1/MRPL45/MRPS21/MRPL3/MRPS27/GFM1/MRPS30/MRPS35/MRPS23/MRPL15/DAP3/MRPL24/MRPL…
GOBP_ACTION_POTENTIAL	GOBP_ACTION_POTENTIAL	128	-0.497001	-1.70169	0.000370854	0.00529052	0.00424307	3047	tags=27%, list=16%, signal=22%	YWHAE/CACNA1D/KCNE4/KCNE3/JUP/CLN3/MYH14/SLMAP/CAV1/DLG1/GBA/ATP1A1/FMR1/SCN8A/AKAP6/AKAP9/FKBP1B/CD36/ATP2A2/NEDD4L/SLC4A3/CXADR/ATP1B1/GJC1/KCNMB2/NUP155/KCNB1/DSP/DSC2/GJA1/KCNC2/SCN9A/DSG2/TAC1
GOBP_TRANSITION_METAL_ION_HOMEOSTASIS	GOBP_TRANSITION_METAL_ION_HOMEOSTASIS	129	0.489366	1.67058	0.000374428	0.00532989	0.00427464	2666	tags=35%, list=14%, signal=30%	S100A8/LCN2/MT1X/MT1G/MT2A/LCK/STEAP4/HAMP/TMC8/MT1F/MT1M/CYBRD1/MT1H/SLC31A2/HMOX1/SLC39A14/ATP6V0D1/STEAP3/BDH2/SCO2/NUBP1/IFNG/HEPH/HMOX2/EPAS1/FXN/HPX/SLC11A1/SLC25A28/ATP6AP1/PRNP/SLC39A5/CP/TFR2/ATP7B/S100A9/B2M/FTL/SLC1A1/ATP6V0A2/APP/BMP6/ATP6V1G1/ALAS2/FTH1
GOBP_REGULATION_OF_PHOSPHOLIPASE_C_ACTIVITY	GOBP_REGULATION_OF_PHOSPHOLIPASE_C_ACTIVITY	46	0.630948	1.85753	0.000377465	0.00535014	0.00429088	2434	tags=39%, list=13%, signal=34%	ITK/AVPR1A/PDGFRA/CD86/PTAFR/C5AR1/ESR1/NTRK2/ANG/HTR2B/RASGRP4/LPAR1/PLCB2/TXK/ADRA1A/GNA15/P2RY12/KIT
GOBP_REGULATION_OF_PHOSPHATIDYLINOSITOL_3_KINASE_SIGNALING	GOBP_REGULATION_OF_PHOSPHATIDYLINOSITOL_3_KINASE_SIGNALING	117	0.50468	1.70612	0.000377484	0.00535014	0.00429088	2632	tags=31%, list=14%, signal=27%	CCL5/FYN/NLRC3/FGR/DCN/SERPINA12/HCLS1/PDGFRA/PIK3R5/PTPN6/PIK3CD/PIP4K2A/HGF/LYN/PIK3IP1/KLF4/SEMA4D/NTRK2/TEK/FLT3/JAK2/PPP2R5C/SELP/PPP1R16B/CBL/CD28/PIK3CG/SRC/F2R/KDR/TWIST1/MAZ/HCST/KIT/CEP55/MAPK3
GOMF_NON_MEMBRANE_SPANNING_PROTEIN_TYROSINE_KINASE_ACTIVITY	GOMF_NON_MEMBRANE_SPANNING_PROTEIN_TYROSINE_KINASE_ACTIVITY	45	0.65782	1.92579	0.00038065	0.005382	0.00431643	1881	tags=42%, list=10%, signal=38%	ITK/FYN/FGR/HCK/JAK3/LCK/SYK/LYN/SLA/PTK2B/BTK/ZAP70/PRKCD/TNK2/JAK2/RIPK2/TXK/TYK2/SRC
GOBP_EXTRINSIC_APOPTOTIC_SIGNALING_PATHWAY	GOBP_EXTRINSIC_APOPTOTIC_SIGNALING_PATHWAY	209	0.437491	1.58879	0.000381376	0.005382	0.00431643	2937	tags=33%, list=15%, signal=28%	PTPRC/FYN/SRPX/FAS/TNFSF10/HGF/TMC8/SIVA1/TERT/BMP5/TNFRSF1B/BCL2/IL33/BCL2A1/ICAM1/AKT1/TNFAIP3/STK4/IL1B/GSTP1/TRAF1/HMOX1/FGA/CD27/CASP8/LGALS3/CFLAR/IL7/RELA/JAK2/IFI27/CIB1/FGG/IFNG/BOK/P2RX7/FGB/BMP4/GABARAP/TIMP3/PMAIP1/STX4/TRADD/TNFSF12/SFRP1/GPX1/SIAH2/PYCARD/PPP2R1B/INHBA/CYLD/SRC/RBCK1/MKNK2/PF4/SP100/FAF1/RAF1/ARHGEF2/AR/NOL3/BRCA1/TNF/PPP1CA/DEDD2/BCL10/ZDHHC3/TNFRSF10B/TGFB1
GOBP_REGULATION_OF_ANTIGEN_PROCESSING_AND_PRESENTATION	GOBP_REGULATION_OF_ANTIGEN_PROCESSING_AND_PRESENTATION	20	0.7812	1.93537	0.000395204	0.00556515	0.00446332	2782	tags=80%, list=15%, signal=68%	CCR7/FGL2/CD74/FCGR2B/LILRB2/HLA-DOA/HLA-DOB/CD68/SLC11A1/NOD2/PYCARD/CCL19/CCL21/TREM2/WAS/TAPBPL
GOBP_NEGATIVE_REGULATION_OF_T_CELL_MEDIATED_IMMUNITY	GOBP_NEGATIVE_REGULATION_OF_T_CELL_MEDIATED_IMMUNITY	22	0.767017	1.93017	0.000418315	0.00587796	0.0047142	2659	tags=55%, list=14%, signal=47%	IL7R/PTPRC/FCGR2B/KLRD1/HLA-F/CLEC4G/KLRC1/LILRB1/NOD2/TBX21/ARG1/LILRB4
GOBP_ORGAN_INDUCTION	GOBP_ORGAN_INDUCTION	21	-0.783859	-1.93101	0.000434543	0.00609291	0.00488659	496	tags=19%, list=3%, signal=19%	BMP2/ROBO2/ROBO1/DKK1
GOMF_CATALYTIC_ACTIVITY_ACTING_ON_A_TRNA	GOMF_CATALYTIC_ACTIVITY_ACTING_ON_A_TRNA	84	-0.562063	-1.81987	0.000435768	0.00609591	0.00488899	5513	tags=58%, list=29%, signal=42%	WARS2/LRRC47/TYW1B/METTL8/EARS2/POP4/TARS2/POP5/QTRT1/THUMPD3/TRMT5/POP1/RPP14/RARS2/DTWD1/PTRH2/AARS2/DALRD3/THUMPD2/QRSL1/LCMT2/METTL2A/TRNT1/AARSD1/YARS2/TRIT1/MARS2/DUS1L/PSTK/METTL2B/DARS2/TYW3/TSEN2/TRMT12/HARS2/METTL1/DTWD2/METTL6/TRMT11/FARSB/TRMT6/NSUN2/IARS2/TRMT61B/RPP40/TYW1/DUS4L/NARS2/TARBP1
GOMF_RIBONUCLEOPROTEIN_COMPLEX_BINDING	GOMF_RIBONUCLEOPROTEIN_COMPLEX_BINDING	117	-0.509973	-1.72872	0.000436619	0.00609591	0.00488899	4249	tags=46%, list=22%, signal=36%	GUF1/SECISBP2/DERL1/SRP68/ERAL1/EIF2A/CPSF6/GEMIN5/HSPA5/SNRPD1/SNRPB2/HNRNPU/YTHDF3/EIF2S1/RICTOR/ITCH/CBX5/EIF6/EIF4A3/DDX5/ETF1/IFIH1/YTHDF1/EIF4H/CKAP5/UNG/PPIH/NAA15/PRPF6/SEC61A2/OLA1/MTOR/NMD3/MTIF2/PHF6/FMR1/TACO1/SPCS1/SRP9/MRPS27/SRP19/SBDS/LARP1/NPM1/RPN2/UHMK1/PRMT5/CPEB4/DHX29/EIF5A2/WDR12/XPO5/PRMT3/LIN28A
GOCC_ENDOSOME_LUMEN	GOCC_ENDOSOME_LUMEN	30	0.710811	1.89952	0.000438271	0.00610595	0.00489705	3048	tags=40%, list=16%, signal=34%	PRF1/CTSK/CTSS/LGMN/JAK2/CTSB/B2M/CTSH/LNPEP/APP/PRLR/LRP2
GOBP_TRNA_MODIFICATION	GOBP_TRNA_MODIFICATION	72	-0.566631	-1.773	0.000440057	0.00611782	0.00490657	4947	tags=54%, list=26%, signal=40%	GTPBP3/MTO1/QTRT1/THUMPD3/TPRKB/TRMT5/MOCS3/ELP4/DTWD1/TRMT112/AARS2/ADAT2/KTI12/THUMPD2/LCMT2/CDK5RAP1/TRUB1/METTL2A/CTU2/OSGEPL1/NAT10/TRIT1/DUS1L/METTL2B/TYW3/TRMT12/METTL1/SSB/DTWD2/METTL6/TRMT11/TRMT6/ELP2/NSUN2/TRMT61B/TYW1/DUS4L/PUS7/TARBP1
GOBP_EOSINOPHIL_MIGRATION	GOBP_EOSINOPHIL_MIGRATION	21	0.782094	1.95931	0.000444336	0.00616422	0.00494378	2379	tags=43%, list=13%, signal=38%	CCL5/PTGER4/CCL2/CD300A/LGALS3/CX3CL1/CCL8/CCL21/CCL3
GOBP_RESPONSE_TO_INTERLEUKIN_4	GOBP_RESPONSE_TO_INTERLEUKIN_4	33	0.693456	1.88781	0.00044674	0.00618446	0.00496002	2610	tags=42%, list=14%, signal=37%	CORO1A/IL24/IL2RG/JAK3/LEF1/TCF7/IL4R/GATA3/PTPN2/XBP1/RPL3/ALAD/NFIL3/ARG1
GOBP_POSITIVE_REGULATION_OF_LIPASE_ACTIVITY	GOBP_POSITIVE_REGULATION_OF_LIPASE_ACTIVITY	71	0.590913	1.86347	0.000455279	0.00628938	0.00504416	2434	tags=35%, list=13%, signal=31%	CCL5/ITK/AVPR1A/PDGFRA/CD86/PTAFR/APOA1/FGFR2/C5AR1/ESR1/NTRK2/ANG/HTR2B/APOA5/RASGRP4/LPAR1/PLCB2/TXK/ADRA1A/PLIN5/APOC2/NR1H3/GNA15/P2RY12/KIT
GOBP_POSITIVE_REGULATION_OF_INTERLEUKIN_4_PRODUCTION	GOBP_POSITIVE_REGULATION_OF_INTERLEUKIN_4_PRODUCTION	24	0.754098	1.94027	0.000477477	0.00658215	0.00527897	1520	tags=58%, list=8%, signal=54%	CD3E/FCER1G/SASH3/SYK/CD86/IRF4/IL33/HLA-E/LGALS9/HAVCR2/PRKCQ/GATA3/CD40LG/CD28
GOBP_REGULATION_OF_BODY_FLUID_LEVELS	GOBP_REGULATION_OF_BODY_FLUID_LEVELS	465	0.365174	1.41627	0.000482215	0.0066335	0.00532015	2696	tags=26%, list=14%, signal=23%	PRKCB/FYN/DOCK8/PLEK/PRKCH/SAA1/LCP2/DGKA/GNG2/DOCK11/FCER1G/FERMT3/FLI1/PDGFRA/SLC22A4/LCK/SYK/F13A1/PIK3R5/PTPN6/LYN/OAS2/HBB/CYP4A11/IRF1/RAB27A/ADCY7/GP1BA/AKR1B1/FLNA/GNAI2/CFTR/F9/CLIC1/SERPINF2/FGA/APLNR/AQP1/ENTPD1/EHD1/VTN/HPSE/TLR4/PRKCD/ADRA2A/RAP2B/PLAT/PRCP/ITPR1/ARRB2/VAV3/AQP3/JAK2/PRKCQ/PLAUR/MICAL1/ADCY3/NCOA1/DGKE/SELP/GATA3/CD40/FGG/SERPINA10/PRKACB/KLKB1/P2RX7/VKORC1/ANXA5/CD4…
GOBP_POSITIVE_REGULATION_OF_T_CELL_MIGRATION	GOBP_POSITIVE_REGULATION_OF_T_CELL_MIGRATION	28	0.709159	1.88076	0.000494011	0.00678152	0.00543887	2460	tags=50%, list=13%, signal=44%	CCL5/ITGA4/DOCK8/CXCL10/CXCL12/CCR2/AIF1/SPN/CXCL13/CCL20/PYCARD/CCL21/TNFRSF14/APP
GOBP_POSITIVE_REGULATION_OF_NATURAL_KILLER_CELL_MEDIATED_CYTOTOXICITY	GOBP_POSITIVE_REGULATION_OF_NATURAL_KILLER_CELL_MEDIATED_CYTOTOXICITY	24	0.752462	1.93606	0.000496019	0.00679484	0.00544955	1222	tags=38%, list=6%, signal=35%	KLRK1/SLAMF6/KLRD1/CD226/RASGRP1/SH2D1A/HLA-F/HLA-E/NCR3
GOBP_NEGATIVE_REGULATION_OF_PEPTIDASE_ACTIVITY	GOBP_NEGATIVE_REGULATION_OF_PEPTIDASE_ACTIVITY	225	0.427421	1.55461	0.000528527	0.00722504	0.00579457	2648	tags=32%, list=14%, signal=27%	LXN/MMP9/RARRES1/SPOCK2/CARD16/CD44/SERPINA12/PZP/FABP1/TNFAIP8/HGF/SERPINA7/SPP2/SERPINA11/TIMP1/RPS6KA1/LAMP3/SERPINB9/IFI16/KLF4/AKT1/SERPINA6/SERPINB8/SERPINF2/PAPLN/AQP1/CST3/CD27/NGFR/VTN/TNFSF14/SERPINA3/CARD8/BST2/ARRB2/TIMP2/SPINT2/IGBP1/PLAUR/MICAL1/ITIH4/LRP1/CDKN2D/SERPINA10/CSTA/ITIH1/SMR3A/SERPINB1/SERPINA1/CST7/TIMP3/PRNP/GPX1/SIAH2/RECK/SERPINB6/SRC/RPS6KA3/AMBP/HRG/COL4A3/CR1/APP…
GOBP_REGULATION_OF_MAST_CELL_ACTIVATION_INVOLVED_IN_IMMUNE_RESPONSE	GOBP_REGULATION_OF_MAST_CELL_ACTIVATION_INVOLVED_IN_IMMUNE_RESPONSE	29	0.717308	1.91068	0.000538577	0.00734709	0.00589246	1276	tags=34%, list=7%, signal=32%	RAC2/IL13RA2/FGR/SYK/CD84/LYN/CD300A/HMOX1/LGALS9/IL4R
GOCC_PHAGOCYTIC_CUP	GOCC_PHAGOCYTIC_CUP	24	0.749495	1.92843	0.000542375	0.00738352	0.00592168	1260	tags=42%, list=7%, signal=39%	CORO1A/LCP1/ARHGAP25/BIN2/ANXA1/AIF1/RAB31/CDC42SE2/TLR4/SH3BP1
GOBP_NEGATIVE_REGULATION_OF_LEUKOCYTE_DEGRANULATION	GOBP_NEGATIVE_REGULATION_OF_LEUKOCYTE_DEGRANULATION	10	0.88738	1.86103	0.000544589	0.00739827	0.00593351	1065	tags=80%, list=6%, signal=76%	IL13RA2/FCGR2B/CCR2/CD84/CD300A/HLA-F/HMOX1/LGALS9
GOBP_POSITIVE_REGULATION_OF_PEPTIDASE_ACTIVITY	GOBP_POSITIVE_REGULATION_OF_PEPTIDASE_ACTIVITY	186	0.449646	1.60249	0.000557095	0.0075525	0.0060572	3317	tags=38%, list=17%, signal=31%	S100A8/FYN/CASP1/ATP2A3/LAPTM5/CLEC7A/FAS/TNFSF10/LCK/SYK/LYN/AIM2/GSN/MEFV/IFI16/ARL6IP5/NLRP1/CIDEB/CASP8/NGFR/MALT1/NLRP12/CFLAR/CARD8/LGALS9/LGMN/JAK2/DAPK1/RIPK2/CASP10/BOK/P2RX1/DLC1/PSME1/PMAIP1/GRN/STAT3/PSME2/ANP32B/TRADD/PYCARD/F2R/ARRB1/S100A9/RCN3/CTSH/PCOLCE/COL4A3/CR1/SLC1A1/APP/MAP3K5/DAP/REST/TANK/NLRC4/PPM1F/TNF/BCL10/HSF1/TNFRSF10B/EPHA4/AGER/RPS3/HMGB1/PICALM/RIPK1/NLRP2/BAK1/S…
GOBP_ACTIVATION_OF_INNATE_IMMUNE_RESPONSE	GOBP_ACTIVATION_OF_INNATE_IMMUNE_RESPONSE	138	0.474223	1.64013	0.000581825	0.00787147	0.00631301	1881	tags=22%, list=10%, signal=20%	FCN1/MNDA/FYN/FCER1G/HCK/PYHIN1/KLRD1/CLEC4A/PSMB9/SYK/LYN/AIM2/IFI16/PSMB8/CLEC4E/LILRA2/TYROBP/MALT1/TLR4/PRKCD/ICAM3/RELA/PRKACB/NFKB1/PSME1/PSME2/MUC15/CLEC6A/CLEC4D/PYCARD/SRC
GOBP_PROTEASOMAL_PROTEIN_CATABOLIC_PROCESS	GOBP_PROTEASOMAL_PROTEIN_CATABOLIC_PROCESS	442	-0.365636	-1.41335	0.000591463	0.00798536	0.00640436	4137	tags=34%, list=22%, signal=27%	UBE4A/UBQLN1/TLK2/KLHL15/UBE2U/CSNK1A1/ANKZF1/YOD1/PSME4/UBXN4/PSMC4/TAF1/GET4/HSPA5/SYVN1/SEL1L/TMEM67/UBQLN2/PSMD10/PSMB3/FBXL6/NHLRC1/JKAMP/RCHY1/PSMB5/SOCS5/RNF144A/ERLIN1/SUMO1/WWP1/ANAPC10/PSMC3/HSPA1B/SOCS6/ARNTL/UGGT1/ITCH/HSP90B1/DNAJC10/FBXO45/CDC20B/ANAPC4/PCNP/CUL2/CUL4A/ANAPC7/UBE2H/FBXO31/DDRGK1/WAC/TNFAIP1/RHBDD2/GIPC1/AQP11/PSMB4/CTNNB1/ZYG11B/PLAA/UBQLN4/TRIB3/SIAH1/DDB1/HECW2/SV…
GOBP_ACTIVATION_OF_MAPK_ACTIVITY	GOBP_ACTIVATION_OF_MAPK_ACTIVITY	147	0.467906	1.6342	0.000595176	0.00801896	0.00643131	3279	tags=33%, list=17%, signal=28%	PTPRC/SAA1/CD74/CXCR4/SYK/HGF/MLKL/FPR1/C5AR1/IL1B/DUSP7/MAP4K1/TLR4/RIPK2/LRRK2/LPAR1/AVPI1/MAP2K6/CD40LG/MDFIC/CD81/S1PR2/GHR/NOD2/PTPN1/MAPKAPK3/CCL19/ARRB1/DUSP5/TGFB3/DBNL/TAB2/MAPKAPK2/KIT/MAP3K5/PROK2/MAPK3/UBC/TNF/ERN1/CXCL17/UBA52/PDE6H/DAXX/MAPKAPK5/UBB/RIPK1/MAP2K1/NTF3
GOBP_LEUKOTRIENE_BIOSYNTHETIC_PROCESS	GOBP_LEUKOTRIENE_BIOSYNTHETIC_PROCESS	15	0.82183	1.89726	0.000621598	0.00835775	0.00670302	1820	tags=40%, list=10%, signal=36%	SYK/ALOX5AP/GGTA1/ALOX5/GGT5/LTA4H
GOMF_ORGANIC_ACID_TRANSMEMBRANE_TRANSPORTER_ACTIVITY	GOMF_ORGANIC_ACID_TRANSMEMBRANE_TRANSPORTER_ACTIVITY	148	-0.467933	-1.63071	0.000623678	0.00835782	0.00670308	3029	tags=30%, list=16%, signal=25%	SLC23A2/SLC15A4/SLC38A3/SLC25A30/SLC38A2/SLC23A1/SLC25A32/CEACAM1/SLC25A14/SLC38A11/SLC43A1/SLC5A6/ABCC2/SLC7A1/SLC6A1/SFXN1/SLC46A1/SLC16A6/ABCB1/SLC3A2/SLC10A5/SLC16A9/SLC3A1/SLC26A2/SLC25A13/SLCO1A2/CD36/SLCO1B3/SLC1A2/ABCG2/SLC16A1/SLC7A9/SLC26A6/SLC22A9/SLC6A11/SLC38A9/SLC19A2/SLC16A14/SLC16A7/SLC7A11/SLC13A3/SLC26A10/SLC7A3/SLC6A14
GOBP_REGULATION_OF_CYSTEINE_TYPE_ENDOPEPTIDASE_ACTIVITY_INVOLVED_IN_APOPTOTIC_SIGNALING_PATHWAY	GOBP_REGULATION_OF_CYSTEINE_TYPE_ENDOPEPTIDASE_ACTIVITY_INVOLVED_IN_APOPTOTIC_SIGNALING_PATHWAY	16	0.817249	1.90386	0.000624156	0.00835782	0.00670308	1186	tags=44%, list=6%, signal=41%	MMP9/FAS/GSN/CASP8/LGALS9/JAK2/PLAUR
GOCC_MITOCHONDRIAL_MATRIX	GOCC_MITOCHONDRIAL_MATRIX	417	-0.367995	-1.41557	0.000632833	0.00845671	0.00678239	3751	tags=30%, list=20%, signal=25%	DMGDH/ACSM2A/SUCLA2/AKR1B15/GRSF1/PDSS2/MRPS22/NSUN4/CLPX/PYCR1/MDH2/PTCD1/TSFM/PDHB/DHX30/TRNT1/MRPL32/NDUFS3/ACSM4/DNA2/MRPL27/IDH3B/LIPT1/POLDIP2/BTD/FECH/MRPL21/MRPS33/TYMS/GLUD2/YARS2/FASTKD5/BCAT2/PRDX3/TRIT1/MARS2/MRPL39/ACP6/GPT2/NDUFA9/AUH/FDX1/HSPE1/MRPL51/THEM5/ACADSB/PDK4/MRPL42/LACTB2/MRPS16/MRPL2/FASTKD2/TMLHE/IDH3A/DHTKD1/STYXL1/PYCR2/RPUSD4/NDUFAF1/DARS2/MTHFD1L/HSPD1/MRPS36/REXO2…
GOCC_CLATHRIN_COATED_VESICLE_MEMBRANE	GOCC_CLATHRIN_COATED_VESICLE_MEMBRANE	112	0.508923	1.72306	0.000647053	0.00862913	0.00692068	1767	tags=20%, list=9%, signal=18%	HLA-DRB4/IL7R/CD3D/CD3G/HLA-DRB5/CD74/CD4/HLA-DPA1/HLA-DRB1/HLA-DPB1/HLA-DQA1/HLA-DRA/HLA-DQB1/CFTR/AP2M1/NECAP2/VAMP2/EPN1/EREG/APOE/SYT11/CD207
GOBP_REGULATION_OF_WNT_SIGNALING_PATHWAY_PLANAR_CELL_POLARITY_PATHWAY	GOBP_REGULATION_OF_WNT_SIGNALING_PATHWAY_PLANAR_CELL_POLARITY_PATHWAY	15	-0.810745	-1.85687	0.000652276	0.0086811	0.00696235	442	tags=27%, list=2%, signal=26%	NKD1/ZNRF3/SFRP2/DKK1
GOBP_POSITIVE_REGULATION_OF_RECEPTOR_SIGNALING_PATHWAY_VIA_STAT	GOBP_POSITIVE_REGULATION_OF_RECEPTOR_SIGNALING_PATHWAY_VIA_STAT	45	0.64639	1.89233	0.000659204	0.00875551	0.00702203	1964	tags=29%, list=10%, signal=26%	IL7R/CCL5/IL23A/IL10RA/CD300A/PTK2B/AKR1B1/IL26/JAK2/CRLF3/GHR/F2R/IL10RB
GOBP_POSITIVE_REGULATION_OF_APOPTOTIC_SIGNALING_PATHWAY	GOBP_POSITIVE_REGULATION_OF_APOPTOTIC_SIGNALING_PATHWAY	114	0.504849	1.71139	0.000667868	0.00885238	0.00709972	4358	tags=46%, list=23%, signal=35%	S100A8/PTPRC/SRPX/FAS/TNFSF10/LCK/BCL2/STK4/NGFR/PRKCD/INHBB/TP53/BOK/TIMP3/PTPN2/PMAIP1/TNFSF12/SFRP1/PYCARD/PPP2R1B/INHBA/CYLD/RBCK1/S100A9/RIPK3/RPL11/FAF1/TP63/NUPR1/TNF/PPP1CA/DEDD2/BCL10/RPS3/NFATC4/UBB/RIPK1/FBXW7/PLEKHF1/BID/SLC9A3R1/NCK2/BBC3/WWOX/LTBR/BMF/APAF1/TNFRSF12A/MCL1/PML/NACC2/PLAGL2
GOBP_REGULATION_OF_ANIMAL_ORGAN_MORPHOGENESIS	GOBP_REGULATION_OF_ANIMAL_ORGAN_MORPHOGENESIS	173	-0.445708	-1.57737	0.000669201	0.00885238	0.00709972	3678	tags=32%, list=19%, signal=26%	AGT/PSME4/HOXB7/PSMC4/PSMD10/PSMB3/SPRY1/SEC24B/PSMB5/PSMC3/EDN1/WNT5A/VEGFA/SIX4/ANKRD6/WT1/GPC4/LGR4/PSMB4/FZD4/FRS2/FZD7/TACSTD2/RYK/AP2B1/PSME3/PSMC5/PSMD4/CELSR1/PSMD6/PSMC2/PSMA1/PSMC6/PDGFA/SOX9/CLTC/PSMD11/SULF1/PSMD14/CELSR2/BMPR1A/NTN4/GREM1/BMP2/RSPO2/FZD6/NKD1/PSMD12/CTHRC1/ZNRF3/ROBO2/TNFRSF11B/ROBO1/SFRP2/DKK1
GOMF_CORECEPTOR_ACTIVITY	GOMF_CORECEPTOR_ACTIVITY	43	0.645125	1.87034	0.000682772	0.00901369	0.00722909	2062	tags=42%, list=11%, signal=37%	CD8A/ITGA4/CD4/CXCR6/CXCR4/CD86/CCR5/FCRL1/RAMP3/NGFR/CD8B/TGFBR3/LRP1/ENG/CD80/CD28/RECK/LY96
GOBP_NEGATIVE_REGULATION_OF_T_CELL_RECEPTOR_SIGNALING_PATHWAY	GOBP_NEGATIVE_REGULATION_OF_T_CELL_RECEPTOR_SIGNALING_PATHWAY	21	0.771518	1.93281	0.000691551	0.00911122	0.00730732	2659	tags=71%, list=14%, signal=62%	PTPN22/LAPTM5/GBP1/PTPN6/SH2D1A/LGALS3/EZR/SLA2/PTPN2/PRNP/DGKZ/THY1/PTPRJ/CBLB/LILRB4
GOBP_NEGATIVE_REGULATION_OF_PRODUCTION_OF_MOLECULAR_MEDIATOR_OF_IMMUNE_RESPONSE	GOBP_NEGATIVE_REGULATION_OF_PRODUCTION_OF_MOLECULAR_MEDIATOR_OF_IMMUNE_RESPONSE	39	0.642474	1.82108	0.000710944	0.00934791	0.00749714	3067	tags=54%, list=16%, signal=45%	CD96/IL13RA2/FCGR2B/FCRL3/JAK3/IRAK3/APOA1/HLA-F/IL33/CD22/HMOX1/BST2/LILRB1/TGFB3/CR1/TBX21/ARG1/LILRB4/TNF/TGFB1/CUEDC2
GOBP_ACTIN_POLYMERIZATION_OR_DEPOLYMERIZATION	GOBP_ACTIN_POLYMERIZATION_OR_DEPOLYMERIZATION	185	0.433715	1.54339	0.000721997	0.00946624	0.00759204	1260	tags=21%, list=7%, signal=19%	CORO1A/PLEK/CCR7/GMFG/WIPF1/HCK/CXCL12/CAPG/HCLS1/AIF1/CDC42EP3/ACTN2/COTL1/TMSB10/GSN/EVL/PTK2B/ICAM1/PPP1R9B/NCKAP1L/PREX1/FCHSD2/ANG/ELN/ARPC2/VASP/PSTPIP2/SSH2/GAS7/WDR1/PFN1/PRKCD/WASF2/CTNNA2/CORO1B/JAK2/MICAL1/SH3BP1
GOBP_CELL_FATE_COMMITMENT_INVOLVED_IN_FORMATION_OF_PRIMARY_GERM_LAYER	GOBP_CELL_FATE_COMMITMENT_INVOLVED_IN_FORMATION_OF_PRIMARY_GERM_LAYER	28	-0.687195	-1.80819	0.000722834	0.00946624	0.00759204	1125	tags=18%, list=6%, signal=17%	CDC73/BMPR1A/CTR9/SFRP2/DKK1
GOBP_ACTIVATION_OF_JANUS_KINASE_ACTIVITY	GOBP_ACTIVATION_OF_JANUS_KINASE_ACTIVITY	15	0.81955	1.89199	0.000733764	0.00954923	0.00765861	1724	tags=40%, list=9%, signal=36%	CCL5/IL23A/CD300A/PTK2B/JAK2/GHR
GOBP_NEGATIVE_REGULATION_OF_NF_KAPPAB_TRANSCRIPTION_FACTOR_ACTIVITY	GOBP_NEGATIVE_REGULATION_OF_NF_KAPPAB_TRANSCRIPTION_FACTOR_ACTIVITY	77	0.54431	1.7454	0.000734399	0.00954923	0.00765861	2703	tags=38%, list=14%, signal=32%	NLRC5/NLRC3/IRAK3/AIM2/KLF4/PTGIS/TNFAIP3/NFKBIA/NLRP12/CARD8/ARRB2/HAVCR2/COMMD6/TRAF3/PRMT2/ZC3H12A/CD200/NOD2/PYCARD/CYLD/RBCK1/TMSB4X/ARRB1/CDKN2A/DAP/FAF1/GFI1/TRIM21/COMMD7
GOBP_NATURAL_KILLER_CELL_PROLIFERATION	GOBP_NATURAL_KILLER_CELL_PROLIFERATION	11	0.864796	1.85795	0.000734959	0.00954923	0.00765861	599	tags=36%, list=3%, signal=35%	IL23A/PTPN22/ELF4/HLA-E
GOBP_NEGATIVE_REGULATION_OF_PATHWAY_RESTRICTED_SMAD_PROTEIN_PHOSPHORYLATION	GOBP_NEGATIVE_REGULATION_OF_PATHWAY_RESTRICTED_SMAD_PROTEIN_PHOSPHORYLATION	10	-0.888273	-1.84648	0.000735005	0.00954923	0.00765861	540	tags=40%, list=3%, signal=39%	GREM1/STRAP/PMEPA1/DKK1
GOCC_CLATHRIN_COATED_ENDOCYTIC_VESICLE	GOCC_CLATHRIN_COATED_ENDOCYTIC_VESICLE	54	0.602571	1.82803	0.000738303	0.00957308	0.00767773	1002	tags=20%, list=5%, signal=19%	HLA-DRB4/HLA-DRB5/CD74/HLA-DPA1/HLA-DRB1/HLA-DPB1/HLA-DQA1/HLA-DRA/HLA-DQB1/CTLA4/AP2M1
GOMF_PHOSPHATIDYLINOSITOL_3_KINASE_BINDING	GOMF_PHOSPHATIDYLINOSITOL_3_KINASE_BINDING	32	0.690051	1.87719	0.000739828	0.0095739	0.00767839	2375	tags=38%, list=12%, signal=33%	CORO1A/FYN/NLRC3/LCK/PIK3IP1/GSN/JAK2/CBL/CALM1/AXL/CALM3/HCST
GOCC_PLASMA_MEMBRANE_BOUNDED_CELL_PROJECTION_CYTOPLASM	GOCC_PLASMA_MEMBRANE_BOUNDED_CELL_PROJECTION_CYTOPLASM	175	-0.450324	-1.59387	0.000749647	0.00968183	0.00776495	2424	tags=19%, list=13%, signal=17%	PURA/SPAG16/PRKAR2A/DNAH14/KIF3B/FMR1/BBS1/OPA1/EFHC1/PRKAR1A/AP3S1/TULP3/SPAST/KIFAP3/WLS/KIF1B/NEK4/KIF5B/AP3B1/UHMK1/DYNC2H1/ARFGEF2/FBXW11/WDR35/DYNC2LI1/RAB27B/WASF1/SYBU/DCDC2/MAP2/KIF3A/DNAH11/MNS1
GOCC_CALYX_OF_HELD	GOCC_CALYX_OF_HELD	15	0.819343	1.89152	0.000761806	0.0098195	0.00787536	35	tags=13%, list=0%, signal=13%	KCNA3/PRKCB
GOBP_POSITIVE_REGULATION_OF_NIK_NF_KAPPAB_SIGNALING	GOBP_POSITIVE_REGULATION_OF_NIK_NF_KAPPAB_SIGNALING	64	0.585292	1.81601	0.000763409	0.00982083	0.00787643	3157	tags=47%, list=17%, signal=39%	IL23A/LAPTM5/CD86/IL1B/CD14/TLR2/CD27/TLR4/NLRP12/TNFSF14/CALR/LGALS9/RELA/HAVCR2/TLR7/TRADD/TERF2IP/NOD2/CCL19/RBCK1/NR3C2/TREM2/PDCD4/APP/IL18R1/TNF/AGER/RPS3/HMGB1/IFI35
GOBP_REGULATION_OF_PROTEIN_SERINE_THREONINE_KINASE_ACTIVITY	GOBP_REGULATION_OF_PROTEIN_SERINE_THREONINE_KINASE_ACTIVITY	458	0.361942	1.40012	0.00076676	0.0098446	0.00789549	3122	tags=29%, list=16%, signal=24%	PTPRC/CCNE1/PTPN22/S100A12/CXCL10/SAA1/CD74/CCND2/DUSP2/IRAK3/CXCR4/SYK/PIK3R5/PTPN6/CSF1R/NPFFR2/HGF/LYN/MLKL/RASGRP1/TIAM1/CD300A/IQGAP1/PTK2B/FPR1/C5AR1/AKT1/UCHL1/CCND3/TNFAIP3/STK4/IL1B/CDKN2C/GSTP1/SLC8A1/CCNI/DUSP7/HTR2B/MAP4K1/GADD45B/TLR4/PRKCD/RGS2/ADRA2A/CKS1B/FLT3/RIPK2/ATP2B4/CIB1/LRRK2/GADD45G/CD40/DUSP10/CDKN2D/IFNG/LPAR1/MST1/AVPI1/MAP2K6/CDKN3/CD40LG/BLM/HIPK3/BMP4/FGD2/MDFIC/PRK…
GOBP_PROTEIN_CONTAINING_COMPLEX_LOCALIZATION	GOBP_PROTEIN_CONTAINING_COMPLEX_LOCALIZATION	247	-0.415919	-1.5309	0.000773206	0.00988141	0.00792502	4652	tags=38%, list=24%, signal=29%	RAN/IFT46/ARC/SARNP/IFT88/UPF3B/SEC13/IWS1/TTC21B/THOC1/SCRIB/PCID2/IFT172/CPSF2/DNM3/NCBP1/NCBP2/RABL2B/POM121C/AGFG1/HNRNPA2B1/MAK/HNRNPU/TRAF3IP1/CPSF4/RAE1/SFPQ/MAGOHB/TTC30A/ATR/CEP72/EIF6/NUP43/VPS35/EIF4A3/TERF1/GPC4/NUP153/TRIP11/IFT20/SNAP25/ENY2/PURA/NPTN/STX3/TUB/ATAD1/SMG7/AP2B1/CPSF3/MIOS/NMD3/DLG1/IFT80/KIF3B/NUP35/RPGR/RRS1/NUP160/IFT27/KIFAP3/SEH1L/IFT81/NUP37/SLU7/KLHL21/LTV1/HIP…
GOBP_CALCIUM_ION_IMPORT_INTO_CYTOSOL	GOBP_CALCIUM_ION_IMPORT_INTO_CYTOSOL	21	0.76979	1.92849	0.000773987	0.00988141	0.00792502	2663	tags=43%, list=14%, signal=37%	MS4A1/FYN/SLC8A1/RAMP3/TRPV2/ATP2B4/PRNP/SLC24A1/TRPV4
GOBP_POSITIVE_REGULATION_OF_ANTIGEN_RECEPTOR_MEDIATED_SIGNALING_PATHWAY	GOBP_POSITIVE_REGULATION_OF_ANTIGEN_RECEPTOR_MEDIATED_SIGNALING_PATHWAY	18	0.801401	1.91939	0.000774155	0.00988141	0.00792502	1614	tags=56%, list=8%, signal=51%	PTPRC/TRAT1/PRKCB/CCR7/PRKCH/LCK/CD226/RELA/STAP1/CD81
GOBP_POSITIVE_REGULATION_OF_VASCULATURE_DEVELOPMENT	GOBP_POSITIVE_REGULATION_OF_VASCULATURE_DEVELOPMENT	142	0.474199	1.64176	0.000777526	0.00990514	0.00794405	1883	tags=26%, list=10%, signal=24%	PRKCB/ITGB2/CX3CR1/CYBB/SMOC2/ETS1/BTG1/CXCR4/PIK3CD/HGF/TERT/LRG1/PTK2B/KLF4/C5AR1/PTGIS/C3AR1/IL1B/TEK/AKT3/ITGAX/HMOX1/APLNR/AQP1/RRAS/CD40/VEGFB/CCBE1/BMPER/ZC3H12A/ENG/GRN/XBP1/TNFSF12/VEGFC/MDK/SP1
GOBP_POSITIVE_REGULATION_OF_CALCIUM_ION_TRANSPORT_INTO_CYTOSOL	GOBP_POSITIVE_REGULATION_OF_CALCIUM_ION_TRANSPORT_INTO_CYTOSOL	51	0.607261	1.82983	0.000790594	0.0100486	0.00805912	2391	tags=29%, list=13%, signal=26%	CXCL9/CXCL10/CD4/CXCL11/CAPN3/RAMP3/APLNR/CX3CL1/P2RX7/F2R/DRD1/CALM1/BDKRB1/CALM3/THY1
GOBP_NEGATIVE_REGULATION_OF_LIPOPOLYSACCHARIDE_MEDIATED_SIGNALING_PATHWAY	GOBP_NEGATIVE_REGULATION_OF_LIPOPOLYSACCHARIDE_MEDIATED_SIGNALING_PATHWAY	11	0.863155	1.85443	0.000791859	0.0100486	0.00805912	1032	tags=36%, list=5%, signal=34%	CARD16/TNFAIP3/LILRA2/CARD8
GOCC_FICOLIN_1_RICH_GRANULE_MEMBRANE	GOCC_FICOLIN_1_RICH_GRANULE_MEMBRANE	56	0.593862	1.81193	0.000799194	0.0101221	0.00811805	3402	tags=57%, list=18%, signal=47%	ITGB2/FCER1G/LILRB2/CD300A/FPR1/ATP6V0C/NCKAP1L/ITGAX/LGALS3/PRCP/DYNLL1/NFASC/SLC11A1/CLEC4D/FCAR/SERPINB6/TBC1D10C/DOK3/TMEM179B/SIGLEC14/SIRPA/SIGLEC5/NBEAL2/CR1/LILRA3/TCIRG1/AP2A2/CLEC4C/CD93/ADAM8/FPR2/RHOA
GOBP_RESPONSE_TO_REACTIVE_OXYGEN_SPECIES	GOBP_RESPONSE_TO_REACTIVE_OXYGEN_SPECIES	200	0.430354	1.55743	0.000810625	0.010247	0.00821826	2632	tags=28%, list=14%, signal=25%	FYN/CCR7/FBLN5/MMP9/UCP2/ANXA1/ETS1/PDGFRA/NQO1/FABP1/HGF/KLF2/HBB/BCL2/PTK2B/KLF4/TXNIP/AKT1/TNFAIP3/FOS/BTK/GSTP1/SLC8A1/HMOX1/AQP1/PRKCD/SOD2/CFLAR/HP/RELA/LRRK2/GPR37/GCH1/FXN/CYP2E1/APOE/GNAO1/FOXO1/MB/DUSP1/MMP2/PXN/GPX1/SRC/CCL19/KDM6B/RIPK3/SIRPA/AXL/CRK/IL18RAP/JUN/MAP3K5/ADA/EEF2/ARG1/MAPK3
GOBP_NEGATIVE_REGULATION_OF_MACROPHAGE_ACTIVATION	GOBP_NEGATIVE_REGULATION_OF_MACROPHAGE_ACTIVATION	15	0.817285	1.88676	0.000817889	0.010319	0.00827593	2552	tags=67%, list=13%, signal=58%	PTPRC/FCGR2B/CX3CL1/ZC3H12A/CST7/CD200/GRN/SYT11/NR1H3/VSIG4
GOBP_IMMUNOGLOBULIN_PRODUCTION	GOBP_IMMUNOGLOBULIN_PRODUCTION	98	0.510043	1.70573	0.00082398	0.0103758	0.00832153	1682	tags=24%, list=9%, signal=22%	PTPRC/IGLV1-44/IL13RA2/FCGR2B/FCRL3/SASH3/HLA-DRB1/GAPT/SAMHD1/CD86/IL33/HLA-E/BTK/CTNNBL1/HLA-DQB1/CD22/RNF168/IL4R/CD40/CD40LG/CD28/XBP1/HPX/STX4
GOBP_CELLULAR_RESPONSE_TO_INORGANIC_SUBSTANCE	GOBP_CELLULAR_RESPONSE_TO_INORGANIC_SUBSTANCE	201	0.424844	1.53457	0.000876138	0.0110114	0.0088313	2475	tags=24%, list=13%, signal=21%	CYBB/MT1X/MMP9/MT1G/FBP1/MT2A/FOSB/NQO1/HVCN1/MT1F/FABP4/GSN/TSPO/ALOX5AP/IQGAP1/ADCY7/CRHBP/ITPKB/MT1M/AKT1/RASGRP2/FOS/MT1H/CYP1A2/MEF2C/CAPN3/HMOX1/AQP1/CFLAR/CALR/LGMN/CPNE2/JUNB/LRRK2/BLM/FOXO1/SYT11/PRNP/TFR2/CPNE8/ANK3/B2M/ALAD/CRK/CAMK2D/SLC25A24/JUN/APP/BMP6
GOBP_NEGATIVE_REGULATION_OF_CELL_FATE_COMMITMENT	GOBP_NEGATIVE_REGULATION_OF_CELL_FATE_COMMITMENT	12	-0.851498	-1.86537	0.000911501	0.0114339	0.00917016	50	tags=25%, list=0%, signal=25%	FZD7/SFRP2/DKK1
GOBP_NEGATIVE_REGULATION_OF_LOCOMOTION	GOBP_NEGATIVE_REGULATION_OF_LOCOMOTION	280	0.389449	1.44325	0.000913273	0.0114342	0.00917041	2524	tags=29%, list=13%, signal=25%	KLRK1/IL24/CX3CR1/ARHGDIB/IFITM1/CD74/SLAMF8/PTGER4/CXCL12/DCN/CCL2/AIF1/CD300A/BMP5/TIMP1/EVL/BCL2/IL33/KLF4/SEMA4D/PADI2/AKT1/SEMA4A/GSTP1/MEF2C/IGFBP3/DPYSL3/IDH2/CXCL13/HMOX1/PTN/NAV3/RAP2B/CALR/BST2/DDT/RRAS/SPINT2/CORO1B/ATP2B4/LRP1/GATA3/CX3CL1/DUSP10/STAP1/LRCH1/ARHGAP4/PODN/ENG/CD200/PBLD/PTPN2/DLC1/ABHD6/APOE/NR2F2/DUSP1/SFRP1/ATP1B2/RECK/CHRD/HRG/CCL21/IGFBP5/MMRN2/CLDN5/BMP10/OSBPL8/S…
GOBP_LEUKOTRIENE_METABOLIC_PROCESS	GOBP_LEUKOTRIENE_METABOLIC_PROCESS	30	0.690474	1.84518	0.000918962	0.0114835	0.00920992	2286	tags=40%, list=12%, signal=35%	SYK/CYP4A11/ALOX5AP/GGTA1/ALOX5/DPEP2/TLR2/ABCC1/GGT5/LTA4H/PTGR1/MAPKAPK2
GOBP_CELLULAR_TRANSITION_METAL_ION_HOMEOSTASIS	GOBP_CELLULAR_TRANSITION_METAL_ION_HOMEOSTASIS	110	0.504116	1.70587	0.000927835	0.0115723	0.00928114	2666	tags=35%, list=14%, signal=30%	S100A8/LCN2/MT1X/MT1G/MT2A/LCK/HAMP/MT1F/MT1M/CYBRD1/MT1H/SLC31A2/HMOX1/SLC39A14/ATP6V0D1/SCO2/NUBP1/IFNG/HEPH/HMOX2/FXN/HPX/SLC11A1/ATP6AP1/PRNP/SLC39A5/CP/TFR2/ATP7B/S100A9/FTL/SLC1A1/ATP6V0A2/APP/BMP6/ATP6V1G1/ALAS2/FTH1
GOBP_CARDIAC_CELL_FATE_COMMITMENT	GOBP_CARDIAC_CELL_FATE_COMMITMENT	11	-0.858624	-1.83285	0.000941446	0.0117197	0.00939939	631	tags=18%, list=3%, signal=18%	TBX3/DKK1
GOBP_PHOSPHATIDYLINOSITOL_3_KINASE_SIGNALING	GOBP_PHOSPHATIDYLINOSITOL_3_KINASE_SIGNALING	142	0.470567	1.62918	0.000947166	0.0117686	0.00943855	1639	tags=22%, list=9%, signal=20%	CCL5/FYN/NLRC3/FGR/DCN/SERPINA12/HCLS1/PDGFRA/PIK3R5/PTPN6/PIK3CD/PIP4K2A/HGF/LYN/PIK3IP1/KLF4/SEMA4D/AKT1/NTRK2/TEK/HTR2B/FLT3/JAK2/PPP2R5C/SELP/GATA3/PPP1R16B/CBL/SIRT2/CD28/PIK3CG
GOBP_REGULATION_OF_ANIMAL_ORGAN_FORMATION	GOBP_REGULATION_OF_ANIMAL_ORGAN_FORMATION	26	-0.729435	-1.90318	0.000966463	0.0119856	0.0096126	1066	tags=19%, list=6%, signal=18%	SULF1/BMP2/ROBO2/ROBO1/DKK1
GOBP_T_HELPER_17_TYPE_IMMUNE_RESPONSE	GOBP_T_HELPER_17_TYPE_IMMUNE_RESPONSE	33	0.670102	1.82423	0.000974716	0.0120651	0.00967636	1641	tags=33%, list=9%, signal=31%	IL23A/SLAMF6/IRF4/NFKBIZ/MALT1/LY9/IL12RB1/PRKCQ/TNFSF18/ZC3H12A/STAT3
GOBP_REGULATION_OF_GRANULOCYTE_CHEMOTAXIS	GOBP_REGULATION_OF_GRANULOCYTE_CHEMOTAXIS	44	0.642236	1.87388	0.000980911	0.0121189	0.00971949	1982	tags=39%, list=10%, signal=35%	RAC2/CCL5/IL23A/BST1/CCR7/CD74/CSF1R/C5AR1/C3AR1/NCKAP1L/LBP/MPP1/TNFSF18/NOD2/MDK/CCL19/CCL21
GOBP_ERYTHROCYTE_HOMEOSTASIS	GOBP_ERYTHROCYTE_HOMEOSTASIS	107	0.492172	1.65824	0.000982953	0.0121212	0.00972138	3185	tags=38%, list=17%, signal=32%	IKZF1/JAK3/ETS1/HCLS1/LYN/KLF2/INPP5D/STAT1/MAFB/SPI1/ISG15/NCKAP1L/HMOX1/RPS19/TGFBR3/JAK2/LDB1/KLF13/GATA3/BMP4/EPAS1/PTPN2/STAT3/INHBA/MFHAS1/ARID4A/B2M/LYAR/RB1/AXL/ZFP36/KIT/ACIN1/RPS6/SH2B3/ALAS2/DNASE2/ZFP36L1/RPS17/ADD1/HOXA5
GOBP_MESODERMAL_CELL_DIFFERENTIATION	GOBP_MESODERMAL_CELL_DIFFERENTIATION	29	-0.699569	-1.86172	0.000988018	0.0121608	0.00975311	709	tags=21%, list=4%, signal=20%	BMPR1A/GJA1/ITGA2/HMGA2/SFRP2/DKK1
GOBP_NEGATIVE_REGULATION_OF_TRANSPORT	GOBP_NEGATIVE_REGULATION_OF_TRANSPORT	381	0.369143	1.40705	0.00100214	0.0123115	0.00987398	2336	tags=21%, list=12%, signal=19%	CORO1A/TRAT1/PRKCB/MMP9/IL13RA2/CD74/UCP2/FCGR2B/LILRB2/CCR2/ANXA1/CD84/GEM/EPHA3/HAMP/ACTN2/CD300A/TNFRSF1B/HLA-F/BCL2/PTK2B/CRHBP/ICAM1/AKT1/ARL6IP5/GNAI2/IL1B/TLR2/OAZ1/IDH2/HMOX1/UBE2J1/CLIC2/FGF12/LGALS3/RGS2/ADRA2A/BST2/LGALS9/ABCG5/LRRK2/INHBB/PLN/AKT2/OAZ2/NFKB1/APOC1/CD200/MDFIC/APOE/UNC119/GNAO1/CNR1/SYT11/SFRP1/LILRB1/INHBA/SFRP4/CD33/APOC2/APOC3/F2R/ATP1A2/NR1H3/ANK3/FABP5/ABCG8/CALM1…
GOBP_REGULATION_OF_T_HELPER_17_TYPE_IMMUNE_RESPONSE	GOBP_REGULATION_OF_T_HELPER_17_TYPE_IMMUNE_RESPONSE	22	0.748332	1.88315	0.00101764	0.0124785	0.0100079	1501	tags=32%, list=8%, signal=29%	IL23A/NFKBIZ/MALT1/IL12RB1/PRKCQ/TNFSF18/ZC3H12A
GOBP_NEGATIVE_REGULATION_OF_INTERLEUKIN_12_PRODUCTION	GOBP_NEGATIVE_REGULATION_OF_INTERLEUKIN_12_PRODUCTION	18	0.793971	1.9016	0.00103421	0.0126579	0.0101518	1925	tags=61%, list=10%, signal=55%	CCR7/JAK3/IRAK3/TLR8/MEFV/ARRB2/SLAMF1/NFKB1/LILRB1/NOD2/LILRA5
GOMF_COMPLEMENT_BINDING	GOMF_COMPLEMENT_BINDING	19	0.777242	1.87979	0.00103664	0.012664	0.0101567	1413	tags=53%, list=7%, signal=49%	ITGB2/CRP/ITGAM/C5AR1/C8A/PTX3/APCS/CALR/CR2/CFB
GOBP_ESTABLISHMENT_OF_RNA_LOCALIZATION	GOBP_ESTABLISHMENT_OF_RNA_LOCALIZATION	173	-0.438652	-1.5524	0.00105223	0.0128305	0.0102902	4725	tags=42%, list=25%, signal=32%	G3BP2/NUP98/RAN/ARC/SARNP/UPF3B/SEC13/IWS1/THOC1/PCID2/CPSF2/CPSF6/NCBP1/NCBP2/MRPL18/POM121C/AGFG1/HNRNPA2B1/HNRNPU/CPSF4/RAE1/SFPQ/MAGOHB/ATR/EIF6/NUP43/SENP2/EIF4A3/TERF1/KHDRBS1/NUP153/CKAP5/ENY2/PURA/SMG7/CPSF3/NMD3/FMR1/NUP35/RRS1/NUP160/SEH1L/NUP37/SLU7/LTV1/XPO1/TPR/NPM1/NUP133/SSB/POM121/UPF2/THOC7/PHAX/THOC2/CASC3/NSUN2/NUP107/RANBP2/RIOK2/PNPT1/LRPPRC/AHCTF1/NUP205/TOMM20/NUP155/EIF5A2…
GOBP_RESPONSE_TO_ALCOHOL	GOBP_RESPONSE_TO_ALCOHOL	224	0.420516	1.53085	0.00105786	0.0128604	0.0103142	2401	tags=26%, list=13%, signal=23%	S100A8/FYN/CYBB/CCR7/PTGER2/VCAM1/GNG2/PTGER4/AVPR1A/RGS19/PTGFR/FOSB/NQO1/HAMP/KLF2/GSN/HPGD/ADCY7/PTK2B/CRHBP/FGFR2/ICAM1/KLF4/AKT1/CCR5/PPP1R9B/SPI1/FOS/CD14/GSTP1/CFTR/CD27/CASP8/MAP4K1/RGS2/SOD2/TGFBR3/ADCY3/GATA3/CBL/PEMT/BLM/CYP2E1/CNR1/SFRP1/RPS4X/INHBA/CCL19/CCL21/PPARA/CALM1/ALAD/ACTR2/GNB1/CALM3/CCL3/ADAM15/IGFBP7
GOBP_DENDRITIC_CELL_DIFFERENTIATION	GOBP_DENDRITIC_CELL_DIFFERENTIATION	44	0.640166	1.86784	0.0010586	0.0128604	0.0103142	3515	tags=52%, list=18%, signal=43%	CCR7/FCGR2B/LILRB2/IRF8/LYN/IRF4/HLA-B/SPI1/NOTCH2/LGALS9/FLT3/TMEM176A/LILRB1/CCL19/AXL/TREM2/RELB/AGER/ZBTB46/HMGB1/TGFBR2/GAS6/TMEM176B
GOBP_POSITIVE_REGULATION_OF_LIPID_METABOLIC_PROCESS	GOBP_POSITIVE_REGULATION_OF_LIPID_METABOLIC_PROCESS	136	0.470378	1.62088	0.00106714	0.012925	0.010366	2489	tags=32%, list=13%, signal=28%	CCR7/CD74/AVPR1A/FGR/ANXA1/PDGFRA/FABP1/LYN/APOA1/FABP3/PTK2B/AKT1/HSD17B13/IL1B/TEK/HTR2B/PRKCD/APOA5/VAV3/FLT3/CCDC3/MLYCD/IFNG/AKT2/APOC1/ABHD6/APOE/CD81/NSMAF/NOD2/PLIN5/RDH10/APOC2/SRC/CCL19/NR1H3/CCL21/PPARA/DGKZ/TWIST1/P2RY12/KIT/BMP6/RGN
GOCC_MICROBODY_MEMBRANE	GOCC_MICROBODY_MEMBRANE	58	-0.577488	-1.77783	0.00106787	0.012925	0.010366	3354	tags=48%, list=18%, signal=40%	SYT7/CAT/ALDH3A2/PEX19/PEX5/HSD17B4/ATAD1/PXMP4/PEX6/ACBD5/PEX3/IMPDH2/PECR/PNPLA8/PEX2/GNPAT/PEX1/TMEM135/ACSL6/ACSL4/PEX12/TTC1/AGPS/FNDC5/ACSL3/HMGCR/PEX11B/PEX7
GOCC_UBIQUITIN_LIGASE_COMPLEX	GOCC_UBIQUITIN_LIGASE_COMPLEX	268	-0.399388	-1.48681	0.00107505	0.0129879	0.0104165	4557	tags=37%, list=24%, signal=28%	RBX1/KCTD10/RAD18/DERL1/BRAP/CUL3/ANAPC11/CDC16/KLHL2/RNF8/CUL9/FBXO25/KLHL24/UBE4A/KLHL13/KLHL15/UBE2U/SYVN1/SEL1L/FBXL6/RCHY1/PCGF1/RNF144A/WWP1/ANAPC10/MKLN1/UBE2D2/FBXO45/CDC20B/ANAPC4/CUL2/CUL4A/ANAPC7/DCAF16/FBXO31/RNF20/RANBP9/DCAF12/KLHL9/TNFAIP1/RHBDD2/DCUN1D4/MED30/FBXO11/ZYG11B/DDB1/ZSWIM5/DCUN1D3/DCAF8L1/FBXL16/UBE4B/FBXL18/SPOPL/CUL5/PCGF2/RNF11/MED1/CBLL1/FBXL20/USP33/UBXN8/CACYBP/P…
GOBP_INNATE_IMMUNE_RESPONSE_ACTIVATING_SIGNAL_TRANSDUCTION	GOBP_INNATE_IMMUNE_RESPONSE_ACTIVATING_SIGNAL_TRANSDUCTION	113	0.480671	1.63047	0.00110712	0.0133507	0.0107074	2152	tags=24%, list=11%, signal=21%	FCN1/FYN/FCER1G/HCK/KLRD1/CLEC4A/PSMB9/SYK/LYN/PSMB8/CLEC4E/LILRA2/TYROBP/MALT1/PRKCD/ICAM3/RELA/PRKACB/NFKB1/PSME1/PSME2/MUC15/CLEC6A/CLEC4D/SRC/ICAM2/TAB2
GOBP_CELL_SUBSTRATE_ADHESION	GOBP_CELL_SUBSTRATE_ADHESION	332	0.384166	1.44635	0.0011092	0.0133512	0.0107078	2245	tags=23%, list=12%, signal=20%	RAC2/CORO1A/CD96/ITGB2/ITGA4/BST1/CCR7/FBLN5/SKAP1/CD3E/VCAM1/ITGAL/FERMT3/ITGBL1/SPOCK2/CD44/USH2A/LPXN/GBP1/ITGB7/PLEKHA2/EPHA3/ACTN2/PARVG/TIAM1/CCDC80/APOA1/IQGAP1/BCL2/PTK2B/FLNA/STK4/PREX1/TEK/ARPC2/PTN/FGA/VTN/HPSE/SIGLEC1/CALR/RRAS/JAK2/LDB1/FBLN2/CIB1/LRP1/CX3CL1/FGG/ZYX/PRKX/SORBS3/PLG/FGB/LGALS1/DLC1/S100A10/SFRP1/ATP1B2/PXN/MDK/SRC/LIMS2/HRG/CCL21/ONECUT1/RCC2/KDR/LYVE1/FERMT2/MYO1G/A…
GOBP_REGULATION_OF_PATTERN_RECOGNITION_RECEPTOR_SIGNALING_PATHWAY	GOBP_REGULATION_OF_PATTERN_RECOGNITION_RECEPTOR_SIGNALING_PATHWAY	87	0.526828	1.71139	0.00113906	0.0136855	0.0109759	2085	tags=30%, list=11%, signal=27%	PTPN22/FCRL3/IRAK3/CYBA/LYN/IRF4/CD300A/IRF1/SLC15A3/ESR1/TNFAIP3/LILRA2/LBP/BIRC3/CD14/TLR2/TLR4/ARRB2/RNF125/NOD2/TLR1/MFHAS1/USP15/NR1H3/LY96/WDFY1
GOBP_NEGATIVE_REGULATION_OF_NEUROINFLAMMATORY_RESPONSE	GOBP_NEGATIVE_REGULATION_OF_NEUROINFLAMMATORY_RESPONSE	11	0.857015	1.84123	0.00117222	0.014058	0.0112747	1701	tags=64%, list=9%, signal=58%	PTPRC/TNFRSF1B/CX3CL1/CST7/CD200/GRN/SYT11
GOBP_NEGATIVE_REGULATION_OF_MAPK_CASCADE	GOBP_NEGATIVE_REGULATION_OF_MAPK_CASCADE	164	0.438282	1.54329	0.00118505	0.0141677	0.0113626	2659	tags=29%, list=14%, signal=25%	PTPRC/PTPN22/DUSP2/IRAK3/GBP1/PTPN6/LYN/CD300A/KLF4/AKT1/UCHL1/IL1B/GSTP1/RAPGEF1/DUSP7/TLR4/PRKCD/RGS2/NDRG2/IGBP1/EZR/DUSP10/P2RX7/HIPK3/BMP4/TIMP3/PTPN2/APOE/FOXO1/LAX1/DUSP1/SFRP1/PTPN1/CYLD/TBC1D10C/AMBP/PER1/ARRB1/DUSP5/SIRPA/NCOR1/DUSP4/PDCD4/PTPRJ/SH2B3/CSK/LILRB4
GOBP_PROTEIN_TARGETING_TO_MEMBRANE	GOBP_PROTEIN_TARGETING_TO_MEMBRANE	180	0.44117	1.56779	0.00118569	0.0141677	0.0113626	3590	tags=38%, list=19%, signal=31%	ITGB2/FYN/ITGAM/RPS15/CHMP4A/RPS26/RPS9/ZDHHC2/RAB8B/RPL21/RPL13/RPS19/RPS29/RPL18/RPS11/RPL28/CIB1/RPL35/RPL18A/AKT2/RPS5/RPL13A/RPL29/RPL7A/ZDHHC20/RPL41/STOM/PRNP/RPS4X/RPLP2/RPLP1/RPS28/ANK3/RPL3/RPS8/RPL24/SEC61B/TRAM2/RPL11/ZDHHC18/SLC1A1/RPL10/RPL12/ZDHHC7/RPS6/RPL10A/RPS27/RPS2/RPS15A/INPP5K/RPS16/NACA/UBA52/ZDHHC3/VPS37B/RPS17/RPS3/RPL6/CHMP4B/RPL4/RPL37/RPL34/RPL8/RPS25/RPL37A/RPL19/RPL…
GOBP_RESPONSE_TO_METAL_ION	GOBP_RESPONSE_TO_METAL_ION	337	0.379572	1.42974	0.00120478	0.0143481	0.0115073	2475	tags=23%, list=13%, signal=21%	S100A8/CYBB/MT1X/MMP9/VCAM1/MT1G/FBP1/MT2A/FOSB/NQO1/HVCN1/HAMP/MT1F/FABP4/TERT/GSN/TSPO/ALOX5AP/IQGAP1/BCL2/ADCY7/PTK2B/CRHBP/ITPKB/MT1M/C1QA/ICAM1/TXNIP/CYBRD1/AKT1/RASGRP2/ASS1/FOS/MT1H/CYP1A2/CD14/MEF2C/FIBIN/CAPN3/CPS1/HMOX1/FGA/AQP1/CASP8/SOD2/CALR/LGMN/AQP3/TAT/CPNE2/JUNB/LRRK2/IGFBP2/FGG/PLN/FGB/FXN/SUCNR1/DUSP1/CRIP1/SYT11/PRNP/HAAO/TFR2/CPNE8/ATP7B/ANK3/B2M/CALM1/ALAD/PLSCR1/CAMK2D/CALM…
GOBP_POSITIVE_REGULATION_OF_ALPHA_BETA_T_CELL_PROLIFERATION	GOBP_POSITIVE_REGULATION_OF_ALPHA_BETA_T_CELL_PROLIFERATION	21	0.759592	1.90294	0.00120584	0.0143481	0.0115073	1614	tags=62%, list=8%, signal=57%	PTPRC/IL23A/PTPN22/CD3E/CCR2/SYK/HLA-E/ZAP70/LGALS9/RIPK2/HLA-A/CD28/CD81
GOMF_NUCLEOSIDE_TRIPHOSPHATASE_REGULATOR_ACTIVITY	GOMF_NUCLEOSIDE_TRIPHOSPHATASE_REGULATOR_ACTIVITY	457	0.350672	1.35586	0.00120736	0.0143481	0.0115073	2563	tags=21%, list=13%, signal=19%	ARHGAP15/ARHGDIB/ARHGAP30/DOCK8/TAGAP/ARHGEF6/DOCK11/ARHGAP9/RHOH/DOCK2/ACAP1/ARHGAP25/RGS10/DOCK10/DENND2D/RASGRP1/RGS18/TIAM1/DEPDC1/MYCBP2/RASGRF1/IQGAP1/ARAP2/SMAP2/RANBP3L/ABR/RASGRP2/RASA3/RGS1/NCKAP1L/PREX1/CDC42SE1/RAPGEF1/RABGAP1L/DNAJC1/PFN1/FAM13A/HTR2B/ARAP1/RCBTB2/RGS2/RAP1GAP2/CCDC88C/PSD4/VAV3/TNK2/ARHGEF1/TBC1D9/DNAJC15/DENND1C/LRRK2/SH3BP1/RASGRP4/FARP1/DNAJB1/PLN/GMIP/PDE6D/ARHG…
GOBP_CELLULAR_RESPONSE_TO_COPPER_ION	GOBP_CELLULAR_RESPONSE_TO_COPPER_ION	26	0.719172	1.88083	0.00121926	0.0144632	0.0115997	898	tags=31%, list=5%, signal=29%	MT1X/MT1G/MT2A/MT1F/MT1M/MT1H/CYP1A2/AQP1
GOBP_POSITIVE_REGULATION_OF_PHOSPHATIDYLINOSITOL_3_KINASE_SIGNALING	GOBP_POSITIVE_REGULATION_OF_PHOSPHATIDYLINOSITOL_3_KINASE_SIGNALING	85	0.528292	1.70685	0.00122303	0.0144817	0.0116145	2434	tags=32%, list=13%, signal=28%	CCL5/FYN/FGR/DCN/SERPINA12/HCLS1/PDGFRA/PIK3R5/PTPN6/PIK3CD/HGF/LYN/SEMA4D/NTRK2/TEK/FLT3/JAK2/SELP/CBL/CD28/PIK3CG/SRC/F2R/KDR/MAZ/HCST/KIT
GOBP_POSITIVE_REGULATION_OF_HUMORAL_IMMUNE_RESPONSE	GOBP_POSITIVE_REGULATION_OF_HUMORAL_IMMUNE_RESPONSE	19	0.772891	1.86927	0.00122685	0.0145007	0.0116297	2779	tags=53%, list=15%, signal=45%	PTPRC/CCR7/FCGR2B/PGC/IL1B/HPX/NOD2/CR1/C3/TNF
GOBP_NEGATIVE_REGULATION_OF_INTERFERON_GAMMA_PRODUCTION	GOBP_NEGATIVE_REGULATION_OF_INTERFERON_GAMMA_PRODUCTION	34	0.657152	1.81583	0.0012294	0.0145047	0.0116329	2315	tags=50%, list=12%, signal=44%	CD96/LAPTM5/HLA-DRB1/IL33/TLR4/LGALS9/HAVCR2/GATA3/PDCD1LG2/ZC3H12A/LILRB1/PRNP/NOD2/INHBA/AXL/IL1RL1/CR1
GOBP_BODY_FLUID_SECRETION	GOBP_BODY_FLUID_SECRETION	80	-0.536279	-1.70711	0.00123276	0.0145181	0.0116437	2436	tags=22%, list=13%, signal=20%	COPA/OXTR/CDO1/DHODH/MED1/CAV1/PAM/CCND1/ERBB4/PPAT/DDR1/CELSR2/CAD/SLC29A1/STK39/HK2/AGR2/TAC1
GOBP_INOSITOL_LIPID_MEDIATED_SIGNALING	GOBP_INOSITOL_LIPID_MEDIATED_SIGNALING	182	0.439897	1.5665	0.00126295	0.014847	0.0119075	1639	tags=21%, list=9%, signal=19%	CCL5/FYN/NLRC3/FGR/DCN/SERPINA12/HCLS1/PDGFRA/PIK3R5/PTPN6/PIK3CD/CSF1R/PIP4K2A/HGF/LYN/PIK3IP1/PTAFR/GSN/KLF4/SEMA4D/AKT1/PLCL2/NTRK2/TEK/HTR2B/FLT3/JAK2/PPP2R5C/EZR/SELP/GATA3/PLCD1/PPP1R16B/CBL/SIRT2/CD28/PLCB2/PIK3CG
GOBP_REGULATION_OF_VASCULATURE_DEVELOPMENT	GOBP_REGULATION_OF_VASCULATURE_DEVELOPMENT	250	0.411473	1.51646	0.00127226	0.0149297	0.0119738	2232	tags=25%, list=12%, signal=22%	PRKCB/ITGB2/CX3CR1/CYBB/CXCL10/SMOC2/DCN/CCR2/ETS1/BTG1/CXCR4/PIK3CD/HGF/KLF2/TERT/STAT1/LRG1/PTK2B/KLF4/C5AR1/PTGIS/TNFAIP3/C3AR1/ALOX5/GPNMB/IL1B/SEMA4A/TEK/AKT3/ITGAX/CXCL13/HMOX1/PTN/APLNR/AQP1/STAB1/RRAS/ATP2B4/CD40/VEGFB/PPP1R16B/EPN1/CCBE1/BMPER/ZC3H12A/ENG/GRN/XBP1/TNFSF12/SFRP1/RECK/VEGFC/MDK/SP1/HRG/CTSH/CLDN5/KDR/PF4/COL4A3/SP100/TWIST1
GOBP_CELL_MATRIX_ADHESION	GOBP_CELL_MATRIX_ADHESION	212	0.416107	1.51744	0.00131639	0.0154199	0.0123669	2486	tags=25%, list=13%, signal=22%	CD96/ITGB2/ITGA4/BST1/CCR7/FBLN5/SKAP1/CD3E/VCAM1/ITGAL/FERMT3/ITGBL1/CD44/ITGB7/PLEKHA2/EPHA3/ACTN2/PARVG/TIAM1/IQGAP1/BCL2/PTK2B/TEK/FGA/VTN/HPSE/SIGLEC1/RRAS/LDB1/CIB1/LRP1/CX3CL1/FGG/ZYX/FGB/DLC1/S100A10/SFRP1/PXN/SRC/HRG/CCL21/ONECUT1/RCC2/KDR/LYVE1/FERMT2/CCL25/CDKN2A/ITGA8/THY1/ADAM15/ACVRL1/PTPRJ
GOBP_ADENYLATE_CYCLASE_MODULATING_G_PROTEIN_COUPLED_RECEPTOR_SIGNALING_PATHWAY	GOBP_ADENYLATE_CYCLASE_MODULATING_G_PROTEIN_COUPLED_RECEPTOR_SIGNALING_PATHWAY	201	0.418197	1.51056	0.00133235	0.0155789	0.0124945	2487	tags=23%, list=13%, signal=21%	CXCL9/GPR65/CXCL10/PTGER2/GNG2/PTGER4/PTGFR/MARCO/PDE4B/ADCY7/FPR1/FLNA/CXCL11/RGS1/GNAI2/RAMP3/GABBR1/RGS2/ADRA2A/WASF2/PTH1R/S1PR5/PSAP/ATP2B4/ADCY3/PRKACB/LPAR1/PLN/GPR37/VIPR1/GNAO1/GNAS/CNR1/S1PR2/ADRA1A/DRD1/S1PR1/PDE2A/GNA15/PDE4D/PF4/GRK5/GNB1/ADCY4/P2RY12/GNA11/NPY1R
GOBP_MITOCHONDRIAL_TRANSLATION	GOBP_MITOCHONDRIAL_TRANSLATION	120	-0.485991	-1.64529	0.00133966	0.0156366	0.0125407	5330	tags=53%, list=28%, signal=39%	MRPL36/MRPL47/EARS2/MRPL48/TARS2/MRPS28/MRPS18B/MRPL22/MRPS17/MRPS5/MRPL11/MRPL14/RARS2/MRPS24/MRPS18C/MRPL35/ERAL1/MRPL16/AARS2/MRPS7/MRPL18/NGRN/QRSL1/MRPS22/CDK5RAP1/TSFM/MRPL32/MRPL27/MRPL1/MRPL21/MRPS33/YARS2/MRPL39/MRPS25/FASTKD3/MRPL51/MRPL42/MRPS16/MRPL2/FASTKD2/RPUSD4/DARS2/MTIF2/MRPS36/TACO1/MRPL45/MRPS21/MRPL3/MRPS27/GFM1/MRPS30/MRPS35/MRPS23/MRPL15/DAP3/MRPL24/MRPL10/MRPL30/IARS2/LRPP…
GOBP_LYSOSOME_LOCALIZATION	GOBP_LYSOSOME_LOCALIZATION	66	0.570866	1.78031	0.00134327	0.0156507	0.0125521	1347	tags=21%, list=7%, signal=20%	RAC2/IL13RA2/FGR/PTGDS/SYK/CD84/PIK3CD/LYN/CD300A/BTK/HMOX1/LGALS9/IL4R/CBL
GOMF_MONOCARBOXYLIC_ACID_BINDING	GOMF_MONOCARBOXYLIC_ACID_BINDING	65	0.566001	1.76783	0.00135927	0.0157854	0.0126601	2067	tags=31%, list=11%, signal=28%	S100A8/PTGDS/FABP1/AFP/FABP4/FABP3/ALOX5AP/AFM/GSTP1/AKR1C4/STARD5/PSAP/ACACB/CYP26A1/APOC1/ALB/NR2F2/S100A9/FABP5/PC
GOBP_IMMUNOLOGICAL_SYNAPSE_FORMATION	GOBP_IMMUNOLOGICAL_SYNAPSE_FORMATION	13	0.826682	1.82861	0.00136073	0.0157854	0.0126601	1982	tags=77%, list=10%, signal=69%	PRF1/DOCK8/CCR7/DOCK2/MSN/LGALS3/HAVCR2/CD81/CCL19/CCL21
GOBP_ENTRY_INTO_HOST	GOBP_ENTRY_INTO_HOST	143	0.456326	1.58497	0.00136206	0.0157854	0.0126601	2315	tags=30%, list=12%, signal=27%	FCN1/IFITM1/CD74/CD4/HLA-DRB1/ITGB7/TRIM22/CXCR4/CD86/FCN3/SIVA1/GSN/CIITA/LY6E/ICAM1/SELPLG/CCR5/CLEC4G/PTX3/TRIM31/NCAM1/APCS/SIGLEC1/LGALS9/CR2/TRIM68/CLEC4M/CBL/SLAMF1/TRIM8/TRIM25/CD80/LGALS1/CD81/TRIM38/IFITM3/TRIM14/SRC/IFITM2/AXL/TNFRSF14/PLSCR1/CR1
GOBP_CYTOSKELETON_DEPENDENT_INTRACELLULAR_TRANSPORT	GOBP_CYTOSKELETON_DEPENDENT_INTRACELLULAR_TRANSPORT	174	-0.438581	-1.55303	0.00137339	0.0158886	0.0127428	3128	tags=28%, list=16%, signal=24%	TTC30A/SYT4/TUBA1B/RAB21/TRIP11/IFT20/CLN3/VAMP7/MYO1E/MYO1B/PURA/TUB/HOOK1/RAB1A/IFT80/KIF3B/MYO5C/RPGR/OPA1/DYNC1I2/HOOK3/AP3S1/SPAST/IFT27/KIFAP3/IFT81/KIF1B/KIF5B/AP3B1/SSX2IP/MYO19/DYNC2H1/MYO5B/WASL/FBXW11/WDR35/DYNC2LI1/RHOT1/TNPO1/RAB27B/LRPPRC/WASF1/SYBU/MYO1D/MAP2/COPG2/KIF3A/MYO6/FNBP1L
GOBP_ACUTE_PHASE_RESPONSE	GOBP_ACUTE_PHASE_RESPONSE	45	0.629341	1.84242	0.00138294	0.0159709	0.0128089	1885	tags=44%, list=10%, signal=40%	SAA1/SAA2/CRP/ORM2/SAA4/HAMP/ORM1/ASS1/LBP/IL1B/APOL2/SERPINF2/APCS/SERPINA3/HP/ITIH4/SERPINA1/CD163/CNR1/TFR2
GOBP_NEGATIVE_REGULATION_OF_EXOCYTOSIS	GOBP_NEGATIVE_REGULATION_OF_EXOCYTOSIS	28	0.681019	1.80613	0.00140119	0.0161531	0.012955	1065	tags=39%, list=6%, signal=37%	IL13RA2/FCGR2B/CCR2/ANXA1/CD84/CD300A/HLA-F/GNAI2/HMOX1/ADRA2A/LGALS9
GOBP_PURINERGIC_NUCLEOTIDE_RECEPTOR_SIGNALING_PATHWAY	GOBP_PURINERGIC_NUCLEOTIDE_RECEPTOR_SIGNALING_PATHWAY	30	0.681566	1.82137	0.00140679	0.016178	0.012975	1503	tags=30%, list=8%, signal=28%	GPR171/P2RY13/P2RY8/PTAFR/P2RY14/P2RY10/GNAI2/P2RX7/P2RX1
GOBP_PYROPTOSIS	GOBP_PYROPTOSIS	17	0.796307	1.87227	0.00140829	0.016178	0.012975	1270	tags=41%, list=7%, signal=38%	GZMA/GZMB/CASP1/AIM2/NLRP1/CASP8/CASP4
GOBP_SPECIFICATION_OF_ANIMAL_ORGAN_IDENTITY	GOBP_SPECIFICATION_OF_ANIMAL_ORGAN_IDENTITY	34	-0.661312	-1.82595	0.00141656	0.0162445	0.0130283	496	tags=15%, list=3%, signal=14%	BMP2/ROBO2/AXIN2/ROBO1/DKK1
GOBP_REGULATION_OF_LIPID_KINASE_ACTIVITY	GOBP_REGULATION_OF_LIPID_KINASE_ACTIVITY	64	0.568965	1.76535	0.00142	0.0162555	0.0130371	2434	tags=39%, list=13%, signal=34%	CCR7/FGR/PDGFRA/PIK3R5/PIP4K2A/LYN/PIK3IP1/PTK2B/KLF4/TEK/VAV3/FLT3/SLA2/CD81/SOCS3/NOD2/SRC/CCL19/RBL2/CCL21/CISH/RB1/DGKZ/P2RY12/KIT
GOMF_LIPOPEPTIDE_BINDING	GOMF_LIPOPEPTIDE_BINDING	10	0.863743	1.81146	0.00145005	0.0165705	0.0132898	1786	tags=80%, list=9%, signal=73%	CD1C/CD1A/LBP/CD14/TLR2/CD1B/CD1E/TLR1
GOBP_REGULATION_OF_INFLAMMATORY_RESPONSE_TO_ANTIGENIC_STIMULUS	GOBP_REGULATION_OF_INFLAMMATORY_RESPONSE_TO_ANTIGENIC_STIMULUS	26	0.714933	1.86975	0.00146499	0.0167122	0.0134034	1771	tags=42%, list=9%, signal=38%	CCR7/FCGR2B/HLA-DRB1/PLA2G2D/HLA-E/BTK/CD28/CD81/CNR1/NOD2/GPX1
GOBP_P38MAPK_CASCADE	GOBP_P38MAPK_CASCADE	42	0.627269	1.8107	0.00147274	0.0167713	0.0134508	3132	tags=57%, list=16%, signal=48%	PTPN22/HGF/SPI1/IL1B/MAP3K3/GADD45B/LGALS9/EZR/GADD45G/DUSP10/HAND2/ZC3H12A/RELL1/DUSP1/CYLD/MFHAS1/PER1/MAPKAPK2/ZFP36/MAP3K5/ZFP36L1/AGER/PHLPP1/RELL2
GOCC_APICOLATERAL_PLASMA_MEMBRANE	GOCC_APICOLATERAL_PLASMA_MEMBRANE	20	-0.771506	-1.89907	0.00148016	0.0168265	0.0134951	2832	tags=60%, list=15%, signal=51%	THBD/JUP/EPPK1/KRT8/NEDD4/OCLN/CLDN7/CXADR/CLDN6/CLDN4/FZD6/KRT19
GOMF_RNA_METHYLTRANSFERASE_ACTIVITY	GOMF_RNA_METHYLTRANSFERASE_ACTIVITY	48	-0.612659	-1.81277	0.00149226	0.0169347	0.0135818	4771	tags=56%, list=25%, signal=42%	THUMPD3/TRMT5/MEPCE/TGS1/TRMT112/TFB1M/FTSJ3/THUMPD2/LCMT2/NSUN5/NSUN4/METTL2A/METTL14/NOP2/METTL2B/TYW3/TRMT12/EMG1/METTL1/METTL6/TRMT11/TRMT6/NSUN2/TRMT61B/METTL5/TFB2M/TARBP1
GOBP_POSITIVE_REGULATION_OF_MHC_CLASS_II_BIOSYNTHETIC_PROCESS	GOBP_POSITIVE_REGULATION_OF_MHC_CLASS_II_BIOSYNTHETIC_PROCESS	11	0.852132	1.83074	0.00149624	0.0169505	0.0135945	1649	tags=55%, list=9%, signal=50%	CIITA/IL33/TLR4/JAK2/IFNG/XBP1
GOBP_LOCALIZATION_WITHIN_MEMBRANE	GOBP_LOCALIZATION_WITHIN_MEMBRANE	72	0.541302	1.71328	0.00151254	0.0171055	0.0137189	865	tags=18%, list=5%, signal=17%	PTPRC/ITGB2/ITGA4/ITGAL/CD2/DOCK2/ITGB7/RILPL2/GSN/FLNA/PIGR/ZDHHC2/PTN
GOBP_REGULATION_OF_EXTRINSIC_APOPTOTIC_SIGNALING_PATHWAY	GOBP_REGULATION_OF_EXTRINSIC_APOPTOTIC_SIGNALING_PATHWAY	148	0.45809	1.59804	0.001528	0.0172506	0.0138352	2930	tags=36%, list=15%, signal=31%	PTPRC/FYN/SRPX/FAS/TNFSF10/HGF/TMC8/TERT/BMP5/BCL2/ICAM1/AKT1/TNFAIP3/STK4/IL1B/GSTP1/TRAF1/HMOX1/FGA/CASP8/LGALS3/CFLAR/IL7/RELA/FGG/FGB/BMP4/TIMP3/PMAIP1/STX4/TRADD/TNFSF12/SFRP1/GPX1/SIAH2/PYCARD/PPP2R1B/INHBA/CYLD/SRC/RBCK1/PF4/SP100/FAF1/RAF1/ARHGEF2/AR/NOL3/BRCA1/TNF/PPP1CA/DEDD2/BCL10/TNFRSF10B
GOBP_ANTIGEN_PROCESSING_AND_PRESENTATION_OF_ENDOGENOUS_PEPTIDE_ANTIGEN	GOBP_ANTIGEN_PROCESSING_AND_PRESENTATION_OF_ENDOGENOUS_PEPTIDE_ANTIGEN	19	0.766838	1.85463	0.00153117	0.0172567	0.0138401	2004	tags=68%, list=11%, signal=61%	HLA-DRB1/TAP1/ERAP2/HLA-DRA/HLA-F/HLA-E/HLA-B/HLA-C/TAPBP/TAP2/HLA-A/HLA-H/B2M
GOBP_POSITIVE_REGULATION_OF_ANIMAL_ORGAN_MORPHOGENESIS	GOBP_POSITIVE_REGULATION_OF_ANIMAL_ORGAN_MORPHOGENESIS	30	-0.660712	-1.77561	0.00153385	0.0172571	0.0138404	496	tags=17%, list=3%, signal=16%	SOX9/BMP2/ROBO2/ROBO1/DKK1
GOBP_NEGATIVE_REGULATION_OF_HEMOPOIESIS	GOBP_NEGATIVE_REGULATION_OF_HEMOPOIESIS	96	0.520569	1.72391	0.00153732	0.0172665	0.013848	2379	tags=31%, list=13%, signal=27%	FGL2/CD74/FCGR2B/JAK3/ANXA1/RUNX3/LYN/C1QC/IRF1/INPP5D/MAFB/CTLA4/APCS/TLR4/IL17D/IL4R/TMEM176A/GPR68/TNFSF18/ZC3H12A/BMP4/PTPN2/SFRP1/LILRB1/MDK/INHBA/LILRB3/CR1/TBX21/CCL3
GOBP_POSITIVE_REGULATION_OF_T_HELPER_17_TYPE_IMMUNE_RESPONSE	GOBP_POSITIVE_REGULATION_OF_T_HELPER_17_TYPE_IMMUNE_RESPONSE	10	0.861856	1.8075	0.0015436	0.0173073	0.0138807	1142	tags=50%, list=6%, signal=47%	IL23A/NFKBIZ/MALT1/IL12RB1/PRKCQ
GOBP_REGULATION_OF_RECEPTOR_SIGNALING_PATHWAY_VIA_STAT	GOBP_REGULATION_OF_RECEPTOR_SIGNALING_PATHWAY_VIA_STAT	96	0.520274	1.72293	0.00155595	0.0174161	0.0139679	1964	tags=22%, list=10%, signal=20%	IL7R/PTPRC/CCL5/IL23A/IL24/IL10RA/JAK3/CD300A/PTK2B/AKR1B1/IL26/JAK2/CRLF3/IFNG/IFNA21/PTPN2/SOCS3/GHR/F2R/DOT1L/IL10RB
GOBP_DEFENSE_RESPONSE_TO_GRAM_NEGATIVE_BACTERIUM	GOBP_DEFENSE_RESPONSE_TO_GRAM_NEGATIVE_BACTERIUM	71	0.567401	1.78932	0.00156189	0.0174527	0.0139973	1809	tags=21%, list=10%, signal=19%	IGHM/IL23A/LYZ/MPEG1/CD4/RNASE6/DEFB1/LBP/AQP1/RPS19/TLR4/SELP/SLC11A1/PYCARD/MR1
GOBP_ESTABLISHMENT_OF_PROTEIN_LOCALIZATION_TO_ENDOPLASMIC_RETICULUM	GOBP_ESTABLISHMENT_OF_PROTEIN_LOCALIZATION_TO_ENDOPLASMIC_RETICULUM	109	0.489119	1.65126	0.00156821	0.0174705	0.0140116	3523	tags=49%, list=19%, signal=40%	RPS15/CHMP4A/RPS26/RPS9/RPL21/EDEM1/RPL13/RPS19/RPS29/RPL18/RPS11/RPL28/RPL35/RPL18A/RPS5/RPL13A/RPL29/RPL7A/RPL41/RPS4X/RPLP2/RPLP1/RPS28/RPL3/RPS8/RPL24/SEC61B/TRAM2/RPL11/RPL10/RPL12/RPS6/RPL10A/RPS27/RPS2/RPS15A/RPS16/UBA52/RYR2/RPS17/RPS3/RPL6/CHMP4B/SPCS2/RPL4/RPL37/RPL34/RPL8/RPS25/RPL37A/RPL19/RPL9/SGTA
GOBP_NEUTRAL_LIPID_METABOLIC_PROCESS	GOBP_NEUTRAL_LIPID_METABOLIC_PROCESS	122	0.482313	1.6385	0.00157403	0.0174705	0.0140116	2092	tags=26%, list=11%, signal=23%	DGKA/SERPINA12/SLC22A4/FABP1/FABP4/APOA1/FABP3/GK/ANG/CPS1/LIPC/SLC27A5/MGLL/APOA5/LPIN2/DGKE/SIK1/ABHD12B/PCK1/CETP/APOC1/CYP2E1/ABHD6/APOE/PIK3CG/GPX1/PLIN5/APOC2/APOC3/NR1H3/FABP5/DGKZ
GOBP_POSITIVE_REGULATION_OF_PROTEIN_KINASE_B_SIGNALING	GOBP_POSITIVE_REGULATION_OF_PROTEIN_KINASE_B_SIGNALING	160	0.451012	1.58585	0.00157403	0.0174705	0.0140116	2486	tags=28%, list=13%, signal=24%	RAC2/TRAT1/CX3CR1/FYN/CCR7/HCLS1/PDGFRA/LCK/PIK3R5/PIK3CD/CD86/HGF/FGFR2/ESR1/TEK/RHOG/RAMP3/IL26/HPSE/ARRB2/GATA3/CX3CL1/ENG/CD80/CD28/EREG/PIK3CG/TSPYL5/GPX1/VAV1/ICOS/MFHAS1/SRC/CCL19/CCL21/IGFBP5/FERMT2/OSBPL8/AXL/MAZ/CCL3/P2RY12/KIT/PTPRJ
GOCC_ENDOCYTIC_VESICLE_LUMEN	GOCC_ENDOCYTIC_VESICLE_LUMEN	18	0.782989	1.87529	0.00157459	0.0174705	0.0140116	1663	tags=44%, list=9%, signal=41%	GNLY/SAA1/HBB/APOA1/CALR/HP/APOE/HPX
GOCC_CHROMOSOMAL_REGION	GOCC_CHROMOSOMAL_REGION	274	-0.388549	-1.44906	0.00157683	0.0174705	0.0140116	3817	tags=35%, list=20%, signal=28%	XRCC6/WRN/TP53BP1/DYNC1LI1/HNRNPA2B1/PSEN2/RPA4/STAG2/CENPP/HNRNPU/GAR1/KNTC1/PPP1CC/ZW10/WRNIP1/DHX36/PMF1/EID3/ZNF207/TNKS2/SKA2/DNA2/CLIP1/PPP2R5A/ATR/CBX5/DYNLT3/NUP43/SMC3/TERF1/NAT10/PTGES3/CLASP2/MEAF6/PPP1CB/MCM7/CKAP5/BUB1/DDB1/POT1/PURA/RIF1/CENPQ/RAD21/CENPK/ATRX/SMC6/DSN1/HAT1/APC/PHF6/FMR1/RAD51AP1/NHP2/PELI1/PPP2CB/ZNF330/MTBP/NUP160/SEH1L/NUP37/CDK1/RAD17/ITGB3BP/FBXO28/XPO1/PPP2CA…
GOMF_PROSTANOID_RECEPTOR_ACTIVITY	GOMF_PROSTANOID_RECEPTOR_ACTIVITY	10	0.859794	1.80317	0.00159973	0.0176943	0.014191	498	tags=40%, list=3%, signal=39%	PTGER2/PTGER4/PTGFR/HPGD
GOBP_TYPE_I_INTERFERON_PRODUCTION	GOBP_TYPE_I_INTERFERON_PRODUCTION	120	0.483213	1.64137	0.00160762	0.0177516	0.014237	2685	tags=32%, list=14%, signal=27%	PTPN22/NLRC5/NLRC3/IRF8/SYK/TLR8/IRF1/MYD88/STAT1/IFI16/TNFAIP3/ISG15/CD14/TLR2/TLR4/DTX4/RELA/HAVCR2/RIPK2/TRAF3/REL/TRIM25/RNF135/RNF125/NFKB1/TLR7/LILRB1/PYCARD/UBA7/CYLD/IKBKE/SIRPA/POLR2E/POLR2L/PTPRS/NFKB2/RELB/TRIM21
GOMF_CCR_CHEMOKINE_RECEPTOR_BINDING	GOMF_CCR_CHEMOKINE_RECEPTOR_BINDING	32	0.667737	1.81649	0.00161956	0.0178533	0.0143186	2387	tags=47%, list=13%, signal=41%	CCL5/CCL2/CCL18/CCR2/DEFB1/CXCL13/CCRL2/CX3CL1/CCL8/CCL20/CCL19/CCL21/CCL25/CCL3/CCL23
GOBP_RNA_METHYLATION	GOBP_RNA_METHYLATION	61	-0.571195	-1.76756	0.00164576	0.0181117	0.0145258	4947	tags=54%, list=26%, signal=40%	GTPBP3/MTO1/THUMPD3/TRMT5/MEPCE/TGS1/TRMT112/TFB1M/LARP7/FTSJ3/THUMPD2/LCMT2/NSUN5/NSUN4/METTL2A/METTL14/NOP2/METTL2B/NSUN5P2/CBLL1/TYW3/TRMT12/EMG1/METTL1/VIRMA/METTL6/TRMT11/TRMT6/NSUN2/TRMT61B/METTL5/TFB2M/TARBP1
GOBP_T_HELPER_1_TYPE_IMMUNE_RESPONSE	GOBP_T_HELPER_1_TYPE_IMMUNE_RESPONSE	41	0.620665	1.78339	0.00167825	0.0184382	0.0147877	1913	tags=44%, list=10%, signal=40%	IL23A/JAK3/HLA-DRB1/CCR2/LEF1/ANXA1/SPN/IL33/IL1B/SEMA4A/TLR4/IL12RB1/HAVCR2/RIPK2/IL4R/CD80/SLC11A1/CCL19
GOCC_ACTIN_CYTOSKELETON	GOCC_ACTIN_CYTOSKELETON	459	0.349046	1.35193	0.00169599	0.018579	0.0149006	1902	tags=15%, list=10%, signal=14%	RAC2/CORO1A/STK17B/PRKCB/FYN/LCP1/LSP1/VCAM1/WIPF1/FERMT3/FGR/HCK/BIN2/MYO1F/ANXA1/CAPG/LPXN/HCLS1/GBP1/AIF1/RCSD1/NPFFR2/CDC42EP3/EPHA3/ACTN2/COTL1/PARVG/GSN/IQGAP1/FMN2/FLNA/PPP1R9B/CNN2/TEK/RND1/ANG/ARPC2/VASP/DPYSL3/PSTPIP2/MYH3/GAS7/WDR1/MSRA/FOXA3/WASF2/CTNNA2/CORO1B/EZR/DAPK1/MICAL1/SYNPO2/DAAM1/SMTNL1/ZYX/SYNPO/GABARAP/CAPZB/DLC1/CNR1/CAP1/ALDOA/MYO5A/DCTN3/NEXN/PXN/TWF2/SRC/ACTR1B/ARPC4
GOBP_REGULATION_OF_TUMOR_NECROSIS_FACTOR_MEDIATED_SIGNALING_PATHWAY	GOBP_REGULATION_OF_TUMOR_NECROSIS_FACTOR_MEDIATED_SIGNALING_PATHWAY	55	0.583356	1.78075	0.00169674	0.018579	0.0149006	1919	tags=33%, list=10%, signal=30%	CASP1/CARD16/LAPTM5/SYK/APOA1/TNFAIP3/BIRC3/GSTP1/TRAF1/CASP8/CARD8/CCDC3/CASP4/PTPN2/TRADD/PYCARD/CYLD/RBCK1
GOBP_COTRANSLATIONAL_PROTEIN_TARGETING_TO_MEMBRANE	GOBP_COTRANSLATIONAL_PROTEIN_TARGETING_TO_MEMBRANE	96	0.517609	1.7141	0.00170503	0.0186386	0.0149484	3488	tags=49%, list=18%, signal=40%	RPS15/RPS26/RPS9/RPL21/RPL13/RPS19/RPS29/RPL18/RPS11/RPL28/RPL35/RPL18A/RPS5/RPL13A/RPL29/RPL7A/RPL41/RPS4X/RPLP2/RPLP1/RPS28/RPL3/RPS8/RPL24/SEC61B/TRAM2/RPL11/RPL10/RPL12/RPS6/RPL10A/RPS27/RPS2/RPS15A/RPS16/UBA52/RPS17/RPS3/RPL6/RPL4/RPL37/RPL34/RPL8/RPS25/RPL37A/RPL19/RPL9
GOBP_POSITIVE_REGULATION_OF_GRANULOCYTE_MACROPHAGE_COLONY_STIMULATING_FACTOR_PRODUCTION	GOBP_POSITIVE_REGULATION_OF_GRANULOCYTE_MACROPHAGE_COLONY_STIMULATING_FACTOR_PRODUCTION	13	0.822016	1.81829	0.00170815	0.0186416	0.0149508	1518	tags=46%, list=8%, signal=42%	IL23A/SYK/RASGRP1/IL1B/IL17D/CD80
GOMF_TRANSLATION_REGULATOR_ACTIVITY	GOMF_TRANSLATION_REGULATOR_ACTIVITY	121	-0.479683	-1.62557	0.001719	0.0187288	0.0150208	3643	tags=43%, list=19%, signal=35%	EIF2B2/EIF3B/EIF3D/TSFM/EIF1AY/RPS27L/EIF1AD/EIF2S1/EIF2B4/EIF4A2/MCTS1/EIF6/EIF4A3/TYMS/ETF1/EIF2B1/PAIP2/EIF4H/FXR1/EIF5B/EIF3E/CELF1/GTPBP2/PURA/EIF3H/EIF3J/EIF2AK2/ABCF1/MTOR/MTIF2/FMR1/EIF1AX/EIF3A/EIF4G3/EIF3M/EIF4G2/GFM1/LARP1/EIF2B3/EIF2AK1/HBS1L/CPEB4/DENR/BOLL/PAIP1/COPS5/DHFR/DHX29/EIF5A2/IGF2BP2/IGF2BP3/IGF2BP1
GOBP_ACTIN_FILAMENT_ORGANIZATION	GOBP_ACTIN_FILAMENT_ORGANIZATION	392	0.366097	1.39874	0.00173262	0.0188458	0.0151146	2120	tags=22%, list=11%, signal=20%	RAC2/CORO1A/LCP1/GPR65/PLEK/CCR7/GMFG/PTGER4/WIPF1/HCK/RHOH/CXCL12/ARHGAP25/MYO1F/CAPG/HCLS1/AIF1/CDC42EP3/ACTN2/COTL1/TMSB10/GSN/APOA1/EVL/FMN2/BCL2/PTK2B/ICAM1/FLNA/PPP1R9B/NCKAP1L/PREX1/FCHSD2/RND1/ANG/RHOG/ELN/ARPC2/VASP/DPYSL3/PSTPIP2/SERPINF2/SSH2/GAS7/WDR1/PFN1/ARAP1/PRKCD/RHOBTB1/SH3KBP1/WASF2/CTNNA2/CORO1B/JAK2/EZR/MICAL1/SYNPO2/SH3BP1/CX3CL1/LPAR1/ZYX/SORBS3/SYNPO/CAPZB/DLC1/S100A10/ELM…
GOBP_SMOOTH_MUSCLE_CELL_PROLIFERATION	GOBP_SMOOTH_MUSCLE_CELL_PROLIFERATION	124	0.473594	1.61197	0.00175026	0.0190061	0.0152431	2856	tags=36%, list=15%, signal=31%	CCL5/MMP9/AIF1/PTAFR/TERT/HPGD/MYD88/STAT1/FGFR2/KLF4/AKR1B1/AKT1/TNFAIP3/GNAI2/GSTP1/MEF2C/IGFBP3/ANG/ELN/SERPINF2/HMOX1/SOD2/NDRG2/JAK2/IRAK4/CX3CL1/IFNG/PDE1A/BMP4/EREG/MMP2/DNMT1/IGFBP5/S1PR1/TGFB3/TGM2/IL15/PDCD4/OGN/JUN/MAP3K5/HDAC4/TNF/ERN1/CALCRL
GOBP_MYELOID_CELL_HOMEOSTASIS	GOBP_MYELOID_CELL_HOMEOSTASIS	130	0.466026	1.59006	0.00175736	0.0190516	0.0152796	2639	tags=32%, list=14%, signal=27%	IKZF1/JAK3/ANXA1/ETS1/HCLS1/PIK3CD/PDE4B/LYN/HAMP/KLF2/INPP5D/STAT1/ITPKB/MAFB/SPI1/ISG15/NCKAP1L/HMOX1/RPS19/TGFBR3/JAK2/LDB1/KLF13/GATA3/BMP4/EPAS1/PTPN2/STAT3/INHBA/MFHAS1/ARID4A/B2M/LYAR/RB1/AXL/ZFP36/KIT/ACIN1/RPS6/SH2B3/ALAS2
GOBP_REGULATION_OF_MAP_KINASE_ACTIVITY	GOBP_REGULATION_OF_MAP_KINASE_ACTIVITY	295	0.38827	1.44407	0.00178864	0.0193587	0.0155259	3122	tags=31%, list=16%, signal=26%	PTPRC/PTPN22/S100A12/SAA1/CD74/DUSP2/IRAK3/CXCR4/SYK/PIK3R5/PTPN6/HGF/LYN/MLKL/RASGRP1/TIAM1/CD300A/IQGAP1/PTK2B/FPR1/C5AR1/UCHL1/IL1B/GSTP1/DUSP7/HTR2B/MAP4K1/GADD45B/TLR4/PRKCD/RGS2/ADRA2A/FLT3/RIPK2/LRRK2/GADD45G/CD40/DUSP10/LPAR1/AVPI1/MAP2K6/CD40LG/HIPK3/BMP4/FGD2/MDFIC/APOE/CD81/PIK3CG/LAX1/DUSP1/SFRP1/S1PR2/GHR/NOD2/PTPN1/MAPKAPK3/KSR1/SRC/CCL19/ARRB1/DUSP5/TGFB3/DBNL/TAB2/TNIK/MAPKAPK2/DU…
GOBP_RESPONSE_TO_INTERFERON_BETA	GOBP_RESPONSE_TO_INTERFERON_BETA	27	0.697638	1.84129	0.0017982	0.0194252	0.0155793	2276	tags=48%, list=12%, signal=42%	MNDA/IFITM1/PYHIN1/AIM2/IRF1/STAT1/IFI16/BST2/XAF1/IFITM3/IFITM2/IKBKE/PLSCR1
GOCC_NEURONAL_DENSE_CORE_VESICLE	GOCC_NEURONAL_DENSE_CORE_VESICLE	13	-0.832015	-1.87658	0.00180072	0.0194252	0.0155793	453	tags=23%, list=2%, signal=23%	VPS13A/CADPS/PENK
GOBP_DNA_REPAIR	GOBP_DNA_REPAIR	466	-0.342134	-1.32583	0.00180414	0.0194301	0.0155832	5006	tags=35%, list=26%, signal=27%	COPS7A/RECQL5/MCM3/POLA1/FEN1/RFC1/ASCC1/UBE2N/ZSWIM7/KDM1A/ASF1A/NONO/HMGN1/BRCC3/FANCI/FH/REV1/REV3L/XRCC5/NPLOC4/RUVBL1/KIN/RBX1/RAD18/TRRAP/USP1/NEIL1/DMAP1/FOXM1/RNF169/PARP9/RNF8/MCM6/ACTR5/TMEM161A/POLR2G/KLHL15/CHEK1/UBE2U/RFC3/SUPT16H/BCCIP/GTF2H3/PSME4/RAD54B/EXD2/XRCC6/WRN/TP53BP1/MSH5/RPA4/DEK/TIMELESS/TDP2/UHRF1/MLH1/RCHY1/MC1R/RAD51C/SUMO1/SFPQ/WRNIP1/EID3/ASCC3/RAD1/DNA2/BACH1/POLD…
GOBP_REGULATION_OF_DENDRITIC_CELL_ANTIGEN_PROCESSING_AND_PRESENTATION	GOBP_REGULATION_OF_DENDRITIC_CELL_ANTIGEN_PROCESSING_AND_PRESENTATION	11	0.847351	1.82047	0.00182026	0.0195566	0.0156846	1982	tags=82%, list=10%, signal=73%	CCR7/FGL2/CD74/FCGR2B/CD68/SLC11A1/NOD2/CCL19/CCL21
GOBP_ANIMAL_ORGAN_FORMATION	GOBP_ANIMAL_ORGAN_FORMATION	60	-0.567874	-1.74953	0.00182185	0.0195566	0.0156846	1396	tags=15%, list=7%, signal=14%	FOXH1/FOLR1/SULF1/BMPR1A/BMP2/ROBO2/AXIN2/ROBO1/DKK1
GOMF_ICOSANOID_RECEPTOR_ACTIVITY	GOMF_ICOSANOID_RECEPTOR_ACTIVITY	14	0.810745	1.82368	0.00182786	0.0195889	0.0157106	552	tags=36%, list=3%, signal=35%	PTGER2/PTGER4/PTGFR/HPGD/CYSLTR1
GOBP_MONOCYTE_CHEMOTAXIS	GOBP_MONOCYTE_CHEMOTAXIS	59	0.582637	1.7777	0.00184336	0.0196904	0.015792	2494	tags=47%, list=13%, signal=41%	CCL5/S100A12/CXCL10/SLAMF8/CXCL12/CCL2/CCL18/CCR2/ANXA1/AIF1/LYN/CCR1/PLA2G7/RPS19/LGALS3/LGMN/CREB3/CX3CL1/CCL8/CCL20/TNFSF18/DUSP1/CCL19/CCL21/CCL25/CCL3/CCL23/SLIT2
GOBP_REGULATION_OF_STRESS_ACTIVATED_PROTEIN_KINASE_SIGNALING_CASCADE	GOBP_REGULATION_OF_STRESS_ACTIVATED_PROTEIN_KINASE_SIGNALING_CASCADE	170	0.433371	1.53025	0.00185	0.0196904	0.015792	1982	tags=27%, list=10%, signal=24%	PTPN22/CCR7/RASSF2/FCGR2B/CLEC7A/FAS/HGF/LYN/RASGRP1/MYD88/PTK2B/AKT1/SPI1/ARL6IP5/IL1B/GSTP1/TRAF1/MAP3K3/SERPINF2/RAPGEF1/IL26/CD27/GADD45B/TLR4/IGBP1/EZR/RIPK2/TRAF3/GADD45G/DUSP10/SLAMF1/HAND2/HIPK3/ZC3H12A/RELL1/FOXO1/DUSP1/SFRP1/NOD2/PYCARD/CYLD/MFHAS1/CCL19/AMBP/PER1/CCL21
GOBP_INTEGRIN_ACTIVATION	GOBP_INTEGRIN_ACTIVATION	23	0.727058	1.84649	0.0018541	0.0196904	0.015792	2400	tags=61%, list=13%, signal=53%	PLEK/SKAP1/PTGER4/FERMT3/CXCL12/CXCL13/SELP/CX3CL1/TLN1/SRC/FERMT2/RAP1B/P2RY12/CDH17
GOBP_POSITIVE_REGULATION_OF_LEUKOCYTE_APOPTOTIC_PROCESS	GOBP_POSITIVE_REGULATION_OF_LEUKOCYTE_APOPTOTIC_PROCESS	24	0.719476	1.85119	0.0018541	0.0196904	0.015792	1332	tags=33%, list=7%, signal=31%	CCL5/IDO1/ANXA1/PIK3CD/LYN/MEF2C/LGALS9/TP53
GOBP_REGULATION_OF_CELL_MORPHOGENESIS	GOBP_REGULATION_OF_CELL_MORPHOGENESIS	286	0.394041	1.45905	0.00185543	0.0196904	0.015792	2265	tags=23%, list=12%, signal=21%	RAC2/CORO1A/ARHGAP15/ITGB2/FYN/FGR/HCK/RHOH/LST1/CD44/CCL2/ANXA1/GBP1/CXCR4/CSF1R/CDC42EP3/TIAM1/APOA1/PTK2B/ICAM1/SEMA4D/FLNA/PREX1/MSN/SEMA4A/CDC42SE1/RND1/RHOG/ARPC2/EPB41L3/PTN/FGA/WDR1/PLEKHO1/PALMD/ARAP1/CDC42SE2/RHOBTB1/CALR/SH3KBP1/FMNL3/FMNL1/CORO1B/EZR/CIB1/FGG/LPAR1/FGB/FGD2/CAPZB/DLC1/S100A10/ALDOA/EPB41/CFDP1/MDK/SRC/LIMS2/RCC2/RND3/KDR/DBNL/BCL9L/FERMT2/CRK/ACTR2
GOBP_POSITIVE_REGULATION_OF_CALCIUM_ION_TRANSMEMBRANE_TRANSPORT	GOBP_POSITIVE_REGULATION_OF_CALCIUM_ION_TRANSMEMBRANE_TRANSPORT	64	0.560598	1.73939	0.00185838	0.0196904	0.015792	3028	tags=34%, list=16%, signal=29%	CXCL9/CXCL10/FGF14/CXCL11/CAPN3/RAMP3/APLNR/STIM2/CX3CL1/ANK2/F2R/DRD1/CALM1/BDKRB1/CACNB2/CALM3/THY1/RGN/KCNE2/RYR2/STAC3/EHD3
GOBP_POSITIVE_REGULATION_OF_TOLERANCE_INDUCTION	GOBP_POSITIVE_REGULATION_OF_TOLERANCE_INDUCTION	11	0.846694	1.81906	0.00185838	0.0196904	0.015792	242	tags=36%, list=1%, signal=36%	IDO1/CD3E/LILRB2/IRAK3
GOBP_POSITIVE_REGULATION_OF_SMALL_GTPASE_MEDIATED_SIGNAL_TRANSDUCTION	GOBP_POSITIVE_REGULATION_OF_SMALL_GTPASE_MEDIATED_SIGNAL_TRANSDUCTION	72	0.534182	1.69074	0.00188371	0.0199265	0.0159813	1974	tags=32%, list=10%, signal=29%	GPR65/GPR174/P2RY8/LPAR6/LYN/RASGRP1/APOA1/RASGRF1/ITPKB/GPR18/P2RY10/STK19/RAPGEF1/ARHGEF3/NOTCH2/JAK2/RASGRP4/LPAR1/PIK3CG/VAV1/SRC/F2R/ARRB1
GOBP_REGULATION_OF_EXOCYTOSIS	GOBP_REGULATION_OF_EXOCYTOSIS	186	0.427607	1.52395	0.00192356	0.0203153	0.0162931	1772	tags=20%, list=9%, signal=18%	RAC2/PRKCB/ITGB2/IL13RA2/FCGR2B/FGR/CCR2/ANXA1/SYK/CD84/ITGAM/LYN/PTAFR/CD300A/RAB27A/HLA-F/GNAI2/CFTR/RAB8B/HMOX1/FGA/ADRA2A/PRAM1/LGALS9/MICAL1/LRRK2/IL4R/FGG/IFNG/VAMP2/P2RX1/FGB/CNR1/STX4/SYT11/ATP6AP1/ADRA1A
GOBP_MRNA_PROCESSING	GOBP_MRNA_PROCESSING	442	-0.348568	-1.34738	0.00194237	0.0204759	0.0164219	4815	tags=34%, list=25%, signal=26%	APOBEC1/TSEN54/NONO/DHX8/NUP98/TARDBP/RNGTT/BUD31/CWC15/KIN/SARNP/UPF3B/DHX15/TGS1/IWS1/TRA2A/PRPF38B/THOC1/SNRNP25/RBBP6/TXNL4A/NCL/CPSF2/CPSF6/POLR2G/SNRPG/NCBP1/SMN1/NCBP2/PRPF4B/GTF2H3/GTF2F2/GEMIN5/LARP7/BUD13/RBM39/ZRANB2/SYF2/TSEN15/LUC7L2/HNRNPF/PPWD1/HNRNPA2B1/GRSF1/SNRPD1/SNW1/SNRPB2/C9orf78/HNRNPU/METTL14/CLNS1A/LSM3/CPSF4/CLP1/SFPQ/NUDT21/DHX36/HNRNPR/SMN2/HNRNPH2/MAGOHB/RSRC1/DHX35/D…
GOBP_REGULATION_OF_CYTOSKELETON_ORGANIZATION	GOBP_REGULATION_OF_CYTOSKELETON_ORGANIZATION	455	0.352853	1.36422	0.00194502	0.0204759	0.0164219	2813	tags=25%, list=15%, signal=22%	RAC2/CORO1A/S100A8/ARHGDIB/GPR65/PLEK/BST1/CCR7/GMFG/PTGER4/HCK/RHOH/CXCL12/CAPG/HCLS1/PDGFRA/CSF1R/CDC42EP3/EPHA3/ACTN2/COTL1/TMSB10/GSN/APOA1/EVL/MYCBP2/IQGAP1/PTK2B/ICAM1/FLNA/NCKAP1L/PREX1/TEK/FCHSD2/RND1/STMN2/RHOG/ELN/ARPC2/VASP/SERPINF2/SSH2/WDR1/NAV3/PFN1/ARAP1/PRKCD/NIN/NOTCH2/RHOBTB1/BST2/WASF2/CTNNA2/CORO1B/NUBP1/CIB1/SYNPO2/LRP1/SH3BP1/CX3CL1/LPAR1/STAP1/P2RX7/SORBS3/CHMP1A/SYNPO/CAPZ…
GOBP_NATURAL_KILLER_CELL_ACTIVATION_INVOLVED_IN_IMMUNE_RESPONSE	GOBP_NATURAL_KILLER_CELL_ACTIVATION_INVOLVED_IN_IMMUNE_RESPONSE	28	0.669856	1.77653	0.00195831	0.0205575	0.0164874	1507	tags=18%, list=8%, signal=16%	CORO1A/RAB27A/HLA-F/CD244/IFNA21
GOBP_POSITIVE_REGULATION_OF_MYOBLAST_FUSION	GOBP_POSITIVE_REGULATION_OF_MYOBLAST_FUSION	13	0.819692	1.81315	0.00195906	0.0205575	0.0164874	1276	tags=38%, list=7%, signal=36%	CXCL9/CD53/NFATC2/EHD1/IL4R
GOMF_ENDOPEPTIDASE_ACTIVITY	GOMF_ENDOPEPTIDASE_ACTIVITY	375	0.36743	1.39817	0.00198147	0.0207595	0.0166494	2141	tags=17%, list=11%, signal=16%	GZMH/GZMA/GZMK/CTSK/GZMB/MMP9/ADAMDEC1/CTSS/CASP1/PGC/PSMB9/CTSW/HGF/PIK3IP1/KLK4/CD5L/UCHL1/PSMB8/ADAM28/CTSZ/PLGLB2/F9/CAPN3/CPS1/PAPLN/CAPN12/MMP7/CASP8/HTRA1/MALT1/C1R/CFLAR/PLAT/HP/HABP2/LGMN/CAPNS1/CFI/CASP4/ADAM19/CASP10/C2/KLKB1/MST1/PCSK7/CFB/MBTPS1/CASP12/PLG/MMP15/HPR/PROZ/USP11/C1RL/SFRP1/MMP2/USP41/PYCARD/USP15/USP10/CTSB/C1S/CTSH/HTRA4/RCE1
GOBP_POSITIVE_REGULATION_OF_MACROPHAGE_MIGRATION	GOBP_POSITIVE_REGULATION_OF_MACROPHAGE_MIGRATION	24	0.717392	1.84583	0.00200372	0.0209591	0.0168094	2947	tags=62%, list=15%, signal=53%	CCL5/CX3CR1/CSF1R/C5AR1/C3AR1/CX3CL1/TNFSF18/MDK/TREM2/CCL3/P2RY12/MAPK3/RARRES2/CXCL17/CMKLR1
GOBP_POSITIVE_REGULATION_OF_B_CELL_DIFFERENTIATION	GOBP_POSITIVE_REGULATION_OF_B_CELL_DIFFERENTIATION	15	0.797971	1.84218	0.00202015	0.0210971	0.0169202	1649	tags=47%, list=9%, signal=43%	SYK/INPP5D/NCKAP1L/BTK/CD27/IL7/XBP1
GOBP_REGULATION_OF_ACTIN_FILAMENT_BASED_PROCESS	GOBP_REGULATION_OF_ACTIN_FILAMENT_BASED_PROCESS	351	0.370686	1.40334	0.00203664	0.0212356	0.0170312	2538	tags=26%, list=13%, signal=23%	RAC2/CORO1A/ARHGDIB/GPR65/PLEK/BST1/CCR7/GMFG/PTGER4/HCK/RHOH/CXCL12/CAPG/HCLS1/PDGFRA/CSF1R/PDE4B/CDC42EP3/EPHA3/ACTN2/COTL1/TMSB10/GSN/APOA1/EVL/IQGAP1/PTK2B/ICAM1/FLNA/CNN2/NCKAP1L/PREX1/TEK/FCHSD2/RND1/RHOG/ELN/ARPC2/VASP/SERPINF2/SSH2/WDR1/PFN1/ARAP1/PRKCD/NOTCH2/RHOBTB1/BST2/WASF2/CTNNA2/CORO1B/SYNPO2/LRP1/SH3BP1/CX3CL1/LPAR1/STAP1/PLN/SORBS3/SYNPO/CAPZB/DLC1/S100A10/SFRP1/C9orf72/PXN/ANK2/…
GOBP_NEGATIVE_REGULATION_OF_CYSTEINE_TYPE_ENDOPEPTIDASE_ACTIVITY	GOBP_NEGATIVE_REGULATION_OF_CYSTEINE_TYPE_ENDOPEPTIDASE_ACTIVITY	73	0.525605	1.67311	0.00205771	0.0214212	0.01718	1897	tags=37%, list=10%, signal=33%	MMP9/CARD16/CD44/FABP1/TNFAIP8/HGF/RPS6KA1/LAMP3/SERPINB9/IFI16/KLF4/AKT1/AQP1/CD27/NGFR/TNFSF14/CARD8/ARRB2/IGBP1/PLAUR/MICAL1/CDKN2D/CST7/GPX1/SIAH2/SRC/RPS6KA3
GOBP_SKIN_DEVELOPMENT	GOBP_SKIN_DEVELOPMENT	389	-0.361928	-1.39034	0.00207553	0.0215724	0.0173013	1550	tags=11%, list=8%, signal=10%	KRT8/NSDHL/PIP5K1A/PDGFA/SOX9/AP3B1/ROCK2/HDAC2/LDB2/COL5A2/SOS1/NSUN2/COMP/ZMPSTE24/HRNR/PKP4/CD109/CLDN4/COL1A2/DSP/FZD6/YAP1/ERRFI1/NOM1/DSC2/LGR5/ETV4/ITGA6/FERMT1/ADAM9/PI3/KRT7/MET/KRT23/ITGA2/REG3A/DSG2/FRAS1/KRT19/FOXQ1/KRT20
GOBP_DETOXIFICATION	GOBP_DETOXIFICATION	121	0.474347	1.6136	0.00209058	0.0216943	0.0173991	1980	tags=23%, list=10%, signal=21%	FBLN5/MT1X/MT1G/MT2A/NQO1/FABP1/IPCEF1/MT1F/HBB/ALOX5AP/MT1M/ADH4/MT1H/GSTP1/CLIC2/SOD2/GSTT1/HP/GSTZ1/GPX2/GCH1/PTGS1/APOE/ALB/GPX1/APOM/OSCP1/S100A9
GOBP_REGULATION_OF_T_HELPER_1_TYPE_IMMUNE_RESPONSE	GOBP_REGULATION_OF_T_HELPER_1_TYPE_IMMUNE_RESPONSE	27	0.691964	1.82632	0.00215353	0.0223017	0.0178863	1913	tags=48%, list=10%, signal=43%	IL23A/JAK3/CCR2/ANXA1/IL33/IL1B/IL12RB1/HAVCR2/RIPK2/IL4R/CD80/SLC11A1/CCL19
GOBP_POST_GOLGI_VESICLE_MEDIATED_TRANSPORT	GOBP_POST_GOLGI_VESICLE_MEDIATED_TRANSPORT	99	-0.48867	-1.61442	0.00215592	0.0223017	0.0178863	2655	tags=32%, list=14%, signal=28%	EXOC2/CLN3/VAMP7/MYO1B/CCDC93/SORCS1/BBS1/KLHL20/SCAMP3/GOSR2/NSF/LYPLA1/BBS2/AP1AR/STXBP6/SCFD1/EXOC6/GOLPH3L/PREPL/ARFGEF2/GOLGA4/KIF16B/BLZF1/VPS54/WIPI1/CNST/VPS13A/EXOC8/ACSL3/SORT1/SCAMP1/STEAP2
GOBP_MONOCYTE_CHEMOTACTIC_PROTEIN_1_PRODUCTION	GOBP_MONOCYTE_CHEMOTACTIC_PROTEIN_1_PRODUCTION	15	0.794238	1.83356	0.00217118	0.0224241	0.0179844	3118	tags=73%, list=16%, signal=61%	C1QTNF3/CLEC7A/SYK/MCOLN2/IL1B/GSTP1/LGALS9/NOD2/TWIST1/AGER/HMGB1
GOMF_PROTEIN_SELF_ASSOCIATION	GOMF_PROTEIN_SELF_ASSOCIATION	54	0.576156	1.74789	0.00218461	0.0225273	0.0180672	3549	tags=48%, list=19%, signal=39%	CCL5/CD2/MYD88/TNFAIP3/MALT1/CCDC88C/FLT3/PTH1R/LDB1/SMTNL1/TP53/VAMP2/AGXT/CRK/DYRK1A/SHANK3/ZFYVE27/RYR2/BCL10/HSF1/TMEM190/TTN/ADAM8/SLC9A3R1/SGTA/AGA
GOBP_CELLULAR_RESPONSE_TO_VASCULAR_ENDOTHELIAL_GROWTH_FACTOR_STIMULUS	GOBP_CELLULAR_RESPONSE_TO_VASCULAR_ENDOTHELIAL_GROWTH_FACTOR_STIMULUS	58	0.560913	1.71215	0.00219643	0.0225781	0.0181079	2286	tags=31%, list=12%, signal=27%	VCAM1/MT1G/SMOC2/DCN/ANXA1/PDGFRA/PIK3CD/GAS1/AKT1/FLT3/RELA/ATP2B4/VEGFB/CCBE1/VEGFC/HRG/KDR/MAPKAPK2
GOCC_ER_TO_GOLGI_TRANSPORT_VESICLE_MEMBRANE	GOCC_ER_TO_GOLGI_TRANSPORT_VESICLE_MEMBRANE	58	0.561037	1.71253	0.00219643	0.0225781	0.0181079	1324	tags=26%, list=7%, signal=24%	HLA-DRB4/HLA-DRB5/CD74/HLA-DPA1/HLA-DRB1/HLA-DPB1/HLA-DQA1/HLA-DRA/HLA-F/HLA-E/HLA-B/HLA-DQB1/HLA-C/CNIH3/HLA-A
GOMF_SECONDARY_ACTIVE_TRANSMEMBRANE_TRANSPORTER_ACTIVITY	GOMF_SECONDARY_ACTIVE_TRANSMEMBRANE_TRANSPORTER_ACTIVITY	224	-0.406952	-1.48197	0.00221049	0.022687	0.0181953	3029	tags=25%, list=16%, signal=21%	SLC23A2/SLC15A4/SLC22A3/SLC38A3/SLC25A30/SLC35D1/SLC38A2/SLC35D2/SLC35E1/SLC23A1/SLC22A18/SLC17A5/SLC8A3/SLC25A3/SLC15A1/SLC45A4/SLC25A14/SLC5A3/SLC2A13/SLC5A6/SLC4A8/SLC25A4/SLC35D3/SLC20A2/SLC6A1/SLC16A6/SLC3A2/SLC10A5/SLC16A9/SLC26A2/SLCO1A2/SLC9A3/SLC35E3/SLC28A1/SLCO1B3/SLC4A3/SLC1A2/SLC12A1/SLC4A4/CLCN3/SLC16A1/SLC26A6/SLC12A2/SLC22A9/SLC25A16/SLC6A11/SLC6A2/SLC24A5/SLC16A14/SLC16A7/SLCO6A1…
GOBP_REGULATION_OF_MACROPHAGE_CHEMOTAXIS	GOBP_REGULATION_OF_MACROPHAGE_CHEMOTAXIS	26	0.702986	1.8385	0.00226059	0.0231649	0.0185785	2947	tags=62%, list=15%, signal=52%	CCL5/SLAMF8/CSF1R/PTK2B/C5AR1/C3AR1/DDT/STAP1/MST1/TNFSF18/MDK/MIF/MAPK3/RARRES2/CXCL17/CMKLR1
GOBP_VIRAL_LIFE_CYCLE	GOBP_VIRAL_LIFE_CYCLE	317	0.371442	1.39289	0.00227899	0.0233169	0.0187005	2940	tags=29%, list=15%, signal=25%	FCN1/CCL5/IFITM1/CD74/CD4/APOBEC3C/CXCR6/APOBEC3A/CCL2/HLA-DRB1/ITGB7/TRIM22/CXCR4/CD86/FCN3/OAS2/SIVA1/ISG20/GSN/LAMP3/BCL2/CIITA/LY6E/ICAM1/IFI16/SELPLG/CCR5/ISG15/APOBEC3G/CHMP4A/CLEC4G/OASL/PTX3/TRIM31/NCAM1/APCS/FAM111A/SIGLEC1/BST2/LGALS9/MX1/CR2/IFI27/TRIM68/CLEC4M/SLAMF1/TRIM8/CHMP7/TRIM25/CCL8/CHMP1A/ZC3H12A/CD80/CD28/LGALS1/RAB43/APOE/CD81/STOM/TRIM38/NUP50/IFITM3/TRIM14/PPIB/IFITM2/PPA…
GOBP_PLATELET_AGGREGATION	GOBP_PLATELET_AGGREGATION	60	0.55227	1.69444	0.00228867	0.023364	0.0187383	1648	tags=32%, list=9%, signal=29%	PLEK/FERMT3/PDGFRA/SYK/PTPN6/LYN/HBB/GP1BA/FLNA/CLIC1/FGA/PRKCD/RAP2B/PRKCQ/FGG/TLN1/FGB/PIK3CG/GNAS
GOCC_LATE_ENDOSOME	GOCC_LATE_ENDOSOME	234	0.40293	1.47685	0.00229386	0.023364	0.0187383	3027	tags=29%, list=16%, signal=24%	HLA-DRB4/HLA-DMB/GIMAP5/HLA-DRB5/CD74/CTSS/HLA-DMA/HLA-DRB1/CD68/CXCR4/HLA-DRA/RAB27A/MCOLN2/MREG/LAMP3/CRHBP/CD79A/CHMP4A/SLC31A2/CD1E/SLC39A14/SIGLEC1/STEAP3/LITAF/APOA5/BST2/LGMN/PSAP/LRRK2/SLA2/CHMP7/FIG4/CHMP1A/CST7/ABHD6/GRN/PARM1/SLC11A1/VAMP5/MYO5A/MTM1/MR1/IFITM3/SRC/F2R/RAB14/ATP7B/M6PR/CTSH/RILP/VAC14/UBXN6/VPS4A/SLC1A1/STX8/TCIRG1/MAPK3/MON1B/SDF4/SLC29A3/ARF1/GFRA1/ANKRD13A/RASGEF1B/…
GOCC_DENSE_CORE_GRANULE	GOCC_DENSE_CORE_GRANULE	27	-0.703884	-1.84098	0.0022943	0.023364	0.0187383	453	tags=22%, list=2%, signal=22%	VPS13A/SYT1/MYRIP/CADPS/BACE2/PENK
GOBP_POSITIVE_REGULATION_OF_GRANULOCYTE_CHEMOTAXIS	GOBP_POSITIVE_REGULATION_OF_GRANULOCYTE_CHEMOTAXIS	24	0.712913	1.8343	0.00230334	0.0234196	0.0187828	680	tags=33%, list=4%, signal=32%	RAC2/IL23A/CCR7/CD74/C5AR1/C3AR1/NCKAP1L/LBP
GOBP_RNA_EXPORT_FROM_NUCLEUS	GOBP_RNA_EXPORT_FROM_NUCLEUS	119	-0.469094	-1.58603	0.00232161	0.0234723	0.0188251	4717	tags=45%, list=25%, signal=34%	NUP98/RAN/SARNP/UPF3B/SEC13/IWS1/THOC1/PCID2/CPSF2/CPSF6/NCBP1/NCBP2/POM121C/AGFG1/HNRNPA2B1/CPSF4/RAE1/MAGOHB/EIF6/NUP43/EIF4A3/KHDRBS1/NUP153/ENY2/SMG7/CPSF3/NMD3/NUP35/RRS1/NUP160/SEH1L/NUP37/SLU7/LTV1/XPO1/TPR/NPM1/NUP133/SSB/POM121/UPF2/THOC7/PHAX/THOC2/CASC3/NSUN2/NUP107/RANBP2/RIOK2/NUP205/NUP155/XPO5/XPOT
GOCC_EXTRINSIC_COMPONENT_OF_CYTOPLASMIC_SIDE_OF_PLASMA_MEMBRANE	GOCC_EXTRINSIC_COMPONENT_OF_CYTOPLASMIC_SIDE_OF_PLASMA_MEMBRANE	95	0.513891	1.70109	0.00232191	0.0234723	0.0188251	2428	tags=33%, list=13%, signal=29%	FYN/GNG2/FGR/HCK/LCK/SYK/LYN/SLA/TIAM1/IQGAP1/PTK2B/AKT1/RGS1/GNAI2/KCNAB2/GNB4/ZAP70/TNK2/FARP1/GNG5/GNAO1/GNAS/PLEKHA4/CYLD/SRC/GNG11/GNA15/FERMT2/GNB1/GNA11/SHANK3
GOBP_MACROPHAGE_DIFFERENTIATION	GOBP_MACROPHAGE_DIFFERENTIATION	44	0.619988	1.80897	0.00232286	0.0234723	0.0188251	3582	tags=57%, list=19%, signal=46%	MMP9/CD4/HLA-DRB1/HCLS1/CSF1R/C1QC/SPI1/GAB3/TLR2/CASP8/IFNG/BMP4/PTPN2/INHBA/RB1/PF4/IL15/APP/CEBPA/TGFB1/ZBTB46/RIPK1/NKX2-3/IL34/L3MBTL3
GOBP_REGULATION_OF_DEFENSE_RESPONSE_TO_VIRUS_BY_HOST	GOBP_REGULATION_OF_DEFENSE_RESPONSE_TO_VIRUS_BY_HOST	35	0.632344	1.74098	0.00232286	0.0234723	0.0188251	2347	tags=34%, list=12%, signal=30%	IL23A/PTPN22/AIM2/STAT1/TNFAIP3/APOBEC3G/IL12RB1/ZC3H12A/LILRB1/PYCARD/APOBEC3F/IL15
GOBP_PROTEIN_TRANSPORT_ALONG_MICROTUBULE	GOBP_PROTEIN_TRANSPORT_ALONG_MICROTUBULE	60	-0.55956	-1.72392	0.00234237	0.023633	0.018954	4602	tags=47%, list=24%, signal=35%	IFT46/IFT88/TTC21B/IFT172/RABL2B/MAK/HNRNPU/TRAF3IP1/SFPQ/TTC30A/TRIP11/IFT20/PURA/TUB/IFT80/KIF3B/RPGR/IFT27/KIFAP3/IFT81/KIF5B/SSX2IP/DYNC2H1/WDR35/DYNC2LI1/TNPO1/RAB27B/KIF3A
GOBP_POSITIVE_REGULATION_OF_GLIAL_CELL_MIGRATION	GOBP_POSITIVE_REGULATION_OF_GLIAL_CELL_MIGRATION	11	0.841895	1.80875	0.00243263	0.0244971	0.019647	2399	tags=73%, list=13%, signal=64%	CX3CR1/CCR2/TIAM1/LRP1/CX3CL1/TREM2/CCL3/P2RY12
GOBP_POSITIVE_REGULATION_OF_T_HELPER_1_TYPE_IMMUNE_RESPONSE	GOBP_POSITIVE_REGULATION_OF_T_HELPER_1_TYPE_IMMUNE_RESPONSE	15	0.789052	1.82159	0.00243549	0.0244971	0.019647	1678	tags=40%, list=9%, signal=36%	IL23A/CCR2/IL1B/IL12RB1/RIPK2/SLC11A1
GOBP_NEGATIVE_REGULATION_OF_B_CELL_PROLIFERATION	GOBP_NEGATIVE_REGULATION_OF_B_CELL_PROLIFERATION	17	0.784915	1.84548	0.00245056	0.0245869	0.019719	921	tags=53%, list=5%, signal=50%	MNDA/FCGR2B/LYN/CD300A/INPP5D/BTK/ATM/CTLA4/TYROBP
GOBP_NEGATIVE_REGULATION_OF_LYMPHOCYTE_DIFFERENTIATION	GOBP_NEGATIVE_REGULATION_OF_LYMPHOCYTE_DIFFERENTIATION	52	0.581634	1.74746	0.00245303	0.0245869	0.019719	2352	tags=33%, list=12%, signal=29%	FGL2/CD74/JAK3/ANXA1/RUNX3/IRF1/CTLA4/IL4R/TNFSF18/ZC3H12A/BMP4/PTPN2/SFRP1/MDK/INHBA/CR1/TBX21
GOBP_CORTICOSTEROID_HORMONE_SECRETION	GOBP_CORTICOSTEROID_HORMONE_SECRETION	15	-0.781415	-1.7897	0.00245569	0.0245869	0.019719	1145	tags=20%, list=6%, signal=19%	AGTR1/REN/TAC1
GOBP_VASCULAR_ENDOTHELIAL_GROWTH_FACTOR_RECEPTOR_SIGNALING_PATHWAY	GOBP_VASCULAR_ENDOTHELIAL_GROWTH_FACTOR_RECEPTOR_SIGNALING_PATHWAY	85	0.510895	1.65064	0.00249567	0.024949	0.0200095	2314	tags=31%, list=12%, signal=27%	PRKCB/FYN/CYBB/CYBA/NCF2/PTK2B/NCKAP1L/IL1B/VTN/WASF2/VAV3/VEGFB/CLEC14A/ELMO2/PXN/PTPN1/VEGFC/VAV1/MAPKAPK3/SRC/MMRN2/KDR/AXL/CRK/MAPKAPK2/NCF4
GOBP_CARDIAC_VENTRICLE_DEVELOPMENT	GOBP_CARDIAC_VENTRICLE_DEVELOPMENT	110	-0.480241	-1.60671	0.00250939	0.025048	0.0200888	2594	tags=27%, list=14%, signal=24%	WNT5A/MDM4/SLIT3/TRIP11/SALL4/FRS2/CHD7/MATR3/JAG1/AP2B1/TPM1/MED1/HECTD1/CPE/PPP1R13L/FOXH1/PTCD2/BMPR1A/ZMPSTE24/TBX3/DSP/HOXA13/COL11A1/TMEM65/ROBO2/SOX4/ROBO1/HEY1/SFRP2/SEMA3C
GOBP_DOPAMINE_METABOLIC_PROCESS	GOBP_DOPAMINE_METABOLIC_PROCESS	34	0.633397	1.75019	0.00254755	0.0253902	0.0203633	2246	tags=26%, list=12%, signal=23%	ITGB2/ITGAM/MOXD1/NR4A2/GPR37/GCH1/DRD1/COMT/PNKD
GOMF_ATP_DEPENDENT_MICROTUBULE_MOTOR_ACTIVITY	GOMF_ATP_DEPENDENT_MICROTUBULE_MOTOR_ACTIVITY	34	-0.646479	-1.78499	0.00256417	0.0254915	0.0204445	2033	tags=26%, list=11%, signal=24%	DNAH14/KIF3B/KIF1B/KIF5B/DYNC2H1/DNAH12/KIF16B/KIF3A/DNAH11
GOBP_POSITIVE_REGULATION_OF_DEFENSE_RESPONSE_TO_VIRUS_BY_HOST	GOBP_POSITIVE_REGULATION_OF_DEFENSE_RESPONSE_TO_VIRUS_BY_HOST	27	0.687137	1.81358	0.0025655	0.0254915	0.0204445	2175	tags=37%, list=11%, signal=33%	IL23A/PTPN22/AIM2/STAT1/APOBEC3G/IL12RB1/ZC3H12A/LILRB1/PYCARD/APOBEC3F
GOBP_B_CELL_ACTIVATION_INVOLVED_IN_IMMUNE_RESPONSE	GOBP_B_CELL_ACTIVATION_INVOLVED_IN_IMMUNE_RESPONSE	71	0.553829	1.74652	0.00258196	0.0256093	0.0205389	1649	tags=28%, list=9%, signal=26%	PTPRC/ITM2A/POU2AF1/DOCK11/FCGR2B/DOCK10/GPR183/GAPT/PTK2B/PLCL2/ST3GAL1/TLR4/NOTCH2/MFNG/RNF168/CD40/CD40LG/CD28/LGALS1/XBP1
GOBP_PHAGOSOME_MATURATION	GOBP_PHAGOSOME_MATURATION	45	0.614313	1.79842	0.00258517	0.0256093	0.0205389	2747	tags=40%, list=14%, signal=34%	CORO1A/SLAMF8/SRPX/MREG/ATP6V0C/ATP6V1B2/RAB31/ATP6V0D1/RAB20/RAB43/SYT11/RAB14/ATP6V0B/RAB32/ATP6V0A2/ATP6V1G1/TCIRG1/ATP6V1F
GOBP_ACTIVATION_OF_CYSTEINE_TYPE_ENDOPEPTIDASE_ACTIVITY_INVOLVED_IN_APOPTOTIC_PROCESS	GOBP_ACTIVATION_OF_CYSTEINE_TYPE_ENDOPEPTIDASE_ACTIVITY_INVOLVED_IN_APOPTOTIC_PROCESS	82	0.5254	1.68941	0.00259241	0.0256422	0.0205653	2779	tags=35%, list=15%, signal=30%	S100A8/ATP2A3/LAPTM5/FAS/TNFSF10/LCK/NLRP1/CASP8/NGFR/NLRP12/CFLAR/CARD8/JAK2/CASP10/BOK/P2RX1/DLC1/PMAIP1/ANP32B/TRADD/PYCARD/F2R/S100A9/CTSH/COL4A3/SLC1A1/DAP/NLRC4/TNF
GOBP_NECROTIC_CELL_DEATH	GOBP_NECROTIC_CELL_DEATH	51	0.576918	1.7384	0.00261302	0.025807	0.0206976	2914	tags=47%, list=15%, signal=40%	CASP1/FAS/MLKL/TSPO/BIRC3/CD14/SLC6A6/CASP8/ASAH1/TLR4/CFLAR/TP53/BOK/ALKBH7/CYLD/RBCK1/LY96/RIPK3/MAP3K5/ARHGEF2/NOL3/NUPR1/TNF/IRF3
GOBP_CELL_SURFACE_RECEPTOR_SIGNALING_PATHWAY_INVOLVED_IN_HEART_DEVELOPMENT	GOBP_CELL_SURFACE_RECEPTOR_SIGNALING_PATHWAY_INVOLVED_IN_HEART_DEVELOPMENT	28	-0.659831	-1.73618	0.00262978	0.0259335	0.020799	846	tags=18%, list=4%, signal=17%	SNAI2/BMPR1A/BMP2/HEY1/DKK1
GOMF_LONG_CHAIN_FATTY_ACID_BINDING	GOMF_LONG_CHAIN_FATTY_ACID_BINDING	13	0.808064	1.78743	0.00265732	0.0261378	0.0209628	526	tags=31%, list=3%, signal=30%	S100A8/FABP4/FABP3/ALOX5AP
GOBP_MESODERMAL_CELL_FATE_COMMITMENT	GOBP_MESODERMAL_CELL_FATE_COMMITMENT	16	-0.789426	-1.84386	0.00266043	0.0261378	0.0209628	709	tags=19%, list=4%, signal=18%	BMPR1A/SFRP2/DKK1
GOBP_MYOBLAST_FUSION	GOBP_MYOBLAST_FUSION	34	0.631679	1.74544	0.00266248	0.0261378	0.0209628	1614	tags=29%, list=8%, signal=27%	CXCL9/CD53/CXCL10/JAM2/NFATC2/EHD1/PLEKHO1/CFLAR/IL4R/CD81
GOCC_EXTRINSIC_COMPONENT_OF_PLASMA_MEMBRANE	GOCC_EXTRINSIC_COMPONENT_OF_PLASMA_MEMBRANE	161	0.440152	1.5485	0.00267186	0.0261906	0.0210052	2428	tags=25%, list=13%, signal=22%	FCN1/FYN/GNG2/FGR/HCK/ANXA1/LCK/SYK/LYN/SLA/TIAM1/IQGAP1/PTK2B/AKT1/RGS1/GNAI2/KCNAB2/GNB4/ZAP70/TNK2/CTNNA2/FARP1/PLG/GNG5/GNAO1/GNAS/S100A10/PLEKHA4/CYLD/SRC/GNG11/RS1/GNA15/SYTL3/FERMT2/SYTL1/GNB1/CDH17/GNA11/SHANK3
GOMF_TRANSFERASE_ACTIVITY_TRANSFERRING_HEXOSYL_GROUPS	GOMF_TRANSFERASE_ACTIVITY_TRANSFERRING_HEXOSYL_GROUPS	170	-0.418857	-1.47736	0.00267722	0.0262039	0.0210159	4409	tags=36%, list=23%, signal=28%	ALG10B/TMTC4/HYAL1/TMTC1/UGT2B4/PIGP/GALNT10/B4GALT4/EXTL3/B4GALT6/GBA2/B3GNT2/ALG13/GCNT3/ALG1/B3GALNT1/UGGT1/PIGV/PIGB/GALNT11/AGL/GCNT7/EXT1/OSTC/UGT2B15/PYGL/PLOD3/HEXB/B4GALT3/UGGT2/B3GALT2/TMTC3/DPY19L1/C1GALT1C1/GCNT4/B3GNT5/ALG6/GBA/ALG9/UGT2A3/PIGC/STT3B/B3GAT2/MGAT4B/PYGB/B3GALNT2/UGT3A2/GALNT4/RPN2/EXTL2/DPY19L4/DPM1/GALNT1/STT3A/ALG8/GCNT1/UGT1A1/HAS2/PIGM/UGT2B11/GBE1/C1GALT1
GOBP_ACTIN_CYTOSKELETON_REORGANIZATION	GOBP_ACTIN_CYTOSKELETON_REORGANIZATION	101	0.486052	1.63079	0.00268259	0.0262075	0.0210187	1821	tags=22%, list=10%, signal=20%	ARHGDIB/GPR65/PLEK/GMFG/HCK/ANXA1/HCLS1/PDGFRA/CSF1R/PARVG/GSN/PTK2B/FLNA/TEK/ARAP1/NOTCH2/EZR/STAP1/S1PR2/PHACTR1/PTPN1/MDK
GOBP_REGULATION_OF_OSTEOCLAST_DIFFERENTIATION	GOBP_REGULATION_OF_OSTEOCLAST_DIFFERENTIATION	59	0.574797	1.75378	0.00268559	0.0262075	0.0210187	2991	tags=37%, list=16%, signal=32%	IL23A/RASSF2/CCR1/INPP5D/MAFB/FOS/TYROBP/TLR4/NOTCH2/IFNG/GPR68/GNAS/ATP6AP1/SFRP1/LILRB1/LILRB3/TREM2/CCL3/LILRB4/FBN1/TNF/TFE3
GOBP_HEART_FIELD_SPECIFICATION	GOBP_HEART_FIELD_SPECIFICATION	18	-0.779414	-1.86553	0.00269173	0.0262284	0.0210355	496	tags=33%, list=3%, signal=32%	FOXH1/BMP2/ROBO2/AXIN2/ROBO1/DKK1
GOBP_OSTEOCLAST_DIFFERENTIATION	GOBP_OSTEOCLAST_DIFFERENTIATION	86	0.517451	1.67353	0.0027098	0.0263652	0.0211452	3200	tags=36%, list=17%, signal=30%	IL23A/RASSF2/GPR183/CSF1R/CCR1/INPP5D/MAFB/FOS/TYROBP/TLR4/NOTCH2/JUNB/IFNG/GPR68/CD81/GNAS/ATP6AP1/SFRP1/LILRB1/SRC/LILRB3/LRRK1/TREM2/CCL3/TCIRG1/LILRB4/FBN1/TNF/TFE3/OSCAR/FBXW7
GOBP_EOSINOPHIL_CHEMOTAXIS	GOBP_EOSINOPHIL_CHEMOTAXIS	17	0.782697	1.84027	0.0027165	0.0263912	0.0211661	2379	tags=41%, list=13%, signal=36%	CCL5/CCL2/LGALS3/CX3CL1/CCL8/CCL21/CCL3
GOBP_NEGATIVE_REGULATION_OF_APOPTOTIC_SIGNALING_PATHWAY	GOBP_NEGATIVE_REGULATION_OF_APOPTOTIC_SIGNALING_PATHWAY	203	0.40815	1.47758	0.00273607	0.0265419	0.021287	2677	tags=28%, list=14%, signal=24%	CX3CR1/FYN/MMP9/CD74/CXCL12/CD44/FAS/TNFSF10/HGF/TERT/BMP5/BCL2/ICAM1/AKT1/TNFAIP3/GNAI2/IL1B/NR4A2/GSTP1/HMOX1/FGA/CASP8/LGALS3/SOD2/CFLAR/IL7/ARRB2/RELA/PLAUR/LRRK2/CREB3/CX3CL1/CDKN2D/FGG/BOK/FGB/BMP4/FXN/XBP1/TRADD/GPX1/PTPN1/SIAH2/SRC/CLU/RB1/PF4/MAZ/GATA4/RAF1/ARHGEF2/MIF/ACAA2/AR/NOL3/BRCA1
GOCC_CULLIN_RING_UBIQUITIN_LIGASE_COMPLEX	GOCC_CULLIN_RING_UBIQUITIN_LIGASE_COMPLEX	150	-0.432351	-1.5146	0.00274943	0.026632	0.0213592	2998	tags=29%, list=16%, signal=25%	FBXO45/CDC20B/ANAPC4/CUL2/CUL4A/ANAPC7/DCAF16/FBXO31/DCAF12/KLHL9/TNFAIP1/ZYG11B/DDB1/ZSWIM5/DCAF8L1/FBXL16/FBXL18/SPOPL/CUL5/FBXL20/CACYBP/PLRG1/KLHL20/PDCD6/FBXO38/CDC27/SKP1/GLMN/KLHL21/DCAF10/DCAF8/FBXL4/ERCC8/DET1/KLHL7/CAND1/FBXW11/FBXL17/KLHL12/CDC23/ENC1/USP47/FBXO2/DCAF13
GOMF_ACTIVE_TRANSMEMBRANE_TRANSPORTER_ACTIVITY	GOMF_ACTIVE_TRANSMEMBRANE_TRANSPORTER_ACTIVITY	284	-0.379762	-1.42375	0.00279447	0.0270284	0.0216771	3364	tags=26%, list=18%, signal=22%	SLC41A1/SLC6A9/SLC36A4/SEC61G/ABCC3/RALBP1/ABCB5/SLC23A2/SLC15A4/SLC22A3/SLC38A3/SLC25A30/SLC35D1/SLC38A2/SLC35D2/SLC35E1/SLC23A1/SLC22A18/SLC17A5/SLC8A3/SLC25A3/SLC15A1/SLC45A4/SLC25A14/ABCC9/SLC5A3/ABCC10/SLC2A13/ATP1A1/ABCC4/SLC5A6/SLC4A8/ABCC2/LMBRD1/SLC25A4/SLC35D3/SLC20A2/SLC6A1/ABCB10/SLC16A6/ABCB1/SLC3A2/SLC10A5/SLC16A9/SLC26A2/SLCO1A2/SLC9A3/SLC35E3/SLC28A1/SLCO1B3/SLC4A3/SLC1A2/SLC12A1/…
GOMF_ANION_TRANSMEMBRANE_TRANSPORTER_ACTIVITY	GOMF_ANION_TRANSMEMBRANE_TRANSPORTER_ACTIVITY	423	-0.352162	-1.35492	0.0028018	0.0270593	0.0217019	3077	tags=28%, list=16%, signal=24%	GABRA2/FLVCR1/SLC35B4/SLC5A9/SLC25A44/SLC6A4/SLC38A6/SLC39A8/VDAC3/SLC13A4/SLC12A7/PCYOX1/SLC4A2/SLC9A6/SLC18A2/ANO5/SLC6A9/SLC36A4/CLIC4/SEC61G/ABCC3/SLC2A14/SLC44A1/LRRC8E/SLC23A2/SLC15A4/PGRMC2/SLC35B2/SLC22A3/SLC38A3/XPR1/SLC35B1/SLC25A30/SLC35D1/SLC38A2/SLC35D2/SLC25A33/SLC23A1/AQP11/SLC35A5/SLC25A32/SLC17A5/SLC2A5/CEACAM1/SLC15A1/SLC35B3/SEC61A2/SLC45A4/SLC25A14/SEC63/SLC38A11/SLC43A1/SLC5A…
GOBP_SALIVA_SECRETION	GOBP_SALIVA_SECRETION	11	-0.830501	-1.77282	0.00281174	0.0271152	0.0217468	3	tags=18%, list=0%, signal=18%	OPRK1/TAC1
GOBP_NEGATIVE_REGULATION_OF_LEUKOCYTE_MIGRATION	GOBP_NEGATIVE_REGULATION_OF_LEUKOCYTE_MIGRATION	37	0.633518	1.76736	0.00281842	0.0271397	0.0217664	2722	tags=62%, list=14%, signal=53%	KLRK1/SLAMF8/PTGER4/CXCL12/CCL2/CD300A/BMP5/IL33/PADI2/AKT1/HMOX1/DDT/STAP1/LRCH1/CD200/DUSP1/CCL21/CCL25/RIN3/SLIT2/ADA/MIF/CCL28
GOBP_REGULATION_OF_SYNCYTIUM_FORMATION_BY_PLASMA_MEMBRANE_FUSION	GOBP_REGULATION_OF_SYNCYTIUM_FORMATION_BY_PLASMA_MEMBRANE_FUSION	22	0.717959	1.80672	0.00287095	0.0276049	0.0221395	1276	tags=36%, list=7%, signal=34%	CXCL9/CD53/CXCL10/NFATC2/EHD1/TYROBP/CFLAR/IL4R
GOBP_CELL_CELL_JUNCTION_ASSEMBLY	GOBP_CELL_CELL_JUNCTION_ASSEMBLY	139	-0.438409	-1.51805	0.00288369	0.0276868	0.0222052	3212	tags=34%, list=17%, signal=28%	MARVELD3/MTDH/TBCD/FSCN1/RAB13/POF1B/PARD6G/CTNND1/PRKCI/CLDN20/CLDN15/ZNF703/JUP/CTNNB1/PARD3/CD9/ECT2/GJB6/CDH9/TJP1/CAV1/DLG1/APC/PKN2/CLDN11/ACE2/PDCD6IP/CDH6/PRKCA/GNPAT/ROCK2/OCLN/CLDN22/CLDN7/CTNNA1/SNAI2/PKP4/GJC1/CLDN6/CLDN18/CLDN4/PARD6B/MARVELD2/GJA1/CLDN10/DLG5/CTNND2
GOBP_POSITIVE_REGULATION_OF_RELEASE_OF_SEQUESTERED_CALCIUM_ION_INTO_CYTOSOL	GOBP_POSITIVE_REGULATION_OF_RELEASE_OF_SEQUESTERED_CALCIUM_ION_INTO_CYTOSOL	38	0.626345	1.76738	0.0029185	0.02798	0.0224403	2391	tags=32%, list=13%, signal=28%	CXCL9/CXCL10/CXCL11/CAPN3/APLNR/CX3CL1/F2R/DRD1/CALM1/BDKRB1/CALM3/THY1
GOBP_POSITIVE_REGULATION_OF_CYSTEINE_TYPE_ENDOPEPTIDASE_ACTIVITY_INVOLVED_IN_APOPTOTIC_SIGNALING_PATHWAY	GOBP_POSITIVE_REGULATION_OF_CYSTEINE_TYPE_ENDOPEPTIDASE_ACTIVITY_INVOLVED_IN_APOPTOTIC_SIGNALING_PATHWAY	11	0.836105	1.79631	0.00296894	0.0284123	0.022787	1140	tags=45%, list=6%, signal=43%	FAS/GSN/CASP8/LGALS9/JAK2
GOBP_NCRNA_EXPORT_FROM_NUCLEUS	GOBP_NCRNA_EXPORT_FROM_NUCLEUS	35	-0.638212	-1.78568	0.00297259	0.0284123	0.022787	1813	tags=66%, list=10%, signal=60%	NUP98/RAN/SEC13/NCBP2/POM121C/RAE1/NUP43/NUP153/NUP35/NUP160/SEH1L/NUP37/TPR/NPM1/NUP133/SSB/POM121/PHAX/NUP107/RANBP2/NUP205/NUP155/XPOT
GOBP_RESPONSE_TO_PEPTIDE_HORMONE	GOBP_RESPONSE_TO_PEPTIDE_HORMONE	405	0.353657	1.35404	0.00297661	0.0284123	0.022787	2973	tags=26%, list=16%, signal=22%	PRKCB/FYN/CYBB/BTG2/UCP2/STAT4/CXCL12/JAK3/SERPINA12/ANXA1/TNFSF10/PIP4K2A/LYN/ACTN2/PTPRE/TIMP1/STAT1/FABP3/IQGAP1/ADCY7/CRHBP/ICAM1/AKT1/CCND3/ATP6V0C/ASS1/MAX/ATP6V1B2/GNAI2/EGR2/IL1B/NR4A2/TEK/GSTP1/ECHDC3/TLR2/RAB8B/RAB31/CPS1/SLC39A14/ATP6V0D1/PRKCD/CFLAR/RELA/TGFBR3/JAK2/PRKCQ/LPIN2/ADCY3/INHBB/PCK1/PRKACB/VAMP2/PLN/AKT2/STAT5A/APRT/NFKB1/STAT2/PTPN2/PRKAR2B/EREG/STAT3/FOXO1/XBP1/SOCS3/ATP…
GOBP_MOVEMENT_IN_HOST_ENVIRONMENT	GOBP_MOVEMENT_IN_HOST_ENVIRONMENT	163	0.430195	1.51744	0.00299754	0.0285704	0.0229139	2315	tags=28%, list=12%, signal=24%	FCN1/IFITM1/CD74/CD4/HLA-DRB1/ITGB7/TRIM22/CXCR4/CD86/FCN3/SIVA1/GSN/CIITA/LY6E/ICAM1/SELPLG/CCR5/CLEC4G/PTX3/TRIM31/NCAM1/APCS/SIGLEC1/LGALS9/CR2/TRIM68/CLEC4M/CBL/SLAMF1/TRIM8/TRIM25/CD80/LGALS1/CD81/TRIM38/IFITM3/TRIM14/SRC/IFITM2/PC/AXL/TNFRSF14/PLSCR1/VPS4A/CR1
GOBP_PROTEIN_AUTOPHOSPHORYLATION	GOBP_PROTEIN_AUTOPHOSPHORYLATION	218	0.40648	1.48698	0.00301492	0.0286943	0.0230132	2763	tags=28%, list=15%, signal=24%	PTPRC/STK17B/ITK/RASSF2/FGR/HCK/IRAK3/PDGFRA/CSF1R/LYN/IQGAP1/PTK2B/FGFR2/AKT1/STK4/BTK/GPNMB/NTRK2/ATM/TEK/MAP3K3/STK10/MAP4K1/NLRP12/VRK1/RAP2B/MVP/FLT3/JAK2/PPP2R5C/DAPK1/PIM2/LRRK2/SIK1/PRKX/ENG/PASK/TXK/VEGFC/MAPKAPK3/SRC/MKNK2/NEK6/KDR/CALM1/RIPK3/CSNK1G2/GRK5/TNIK/MAPKAPK2/CAMK2D/CALM3/DYRK1A/KIT/MKNK1/MAPK3/CSK/PPP2R5E/MELK/BCR
GOMF_HEPARIN_BINDING	GOMF_HEPARIN_BINDING	146	0.437934	1.52785	0.00302827	0.0287608	0.0230665	2494	tags=29%, list=13%, signal=26%	SELL/PTPRC/CXCL10/SAA1/LXN/SMOC2/PLA2G2D/CCDC80/LGR6/FGFR2/CXCL11/GPNMB/FGFRL1/ANG/LTBP2/CXCL13/PTN/LIPC/MMP7/CRISPLD2/VTN/APOA5/TGFBR3/SELP/SERPINA10/VEGFB/CCL8/BMP4/RPL29/APOE/SFRP1/MDK/SMOC1/HRG/PRELP/PRG2/PCOLCE/PF4/CCL23/PTPRS/APP/SERPIND1/SLIT2
GOBP_REGULATION_OF_CHOLESTEROL_BIOSYNTHETIC_PROCESS	GOBP_REGULATION_OF_CHOLESTEROL_BIOSYNTHETIC_PROCESS	42	-0.613498	-1.78611	0.00303069	0.0287608	0.0230665	2560	tags=45%, list=13%, signal=39%	MBTPS2/FASN/PRKAA1/KPNB1/PMVK/GPAM/GGPS1/FDPS/HMGCS1/ERLIN2/ACACA/DHCR7/NFYB/IDI1/TM7SF2/SQLE/HMGCR/CYP51A1/CYP7A1
GOBP_NEGATIVE_REGULATION_OF_INTERLEUKIN_1_PRODUCTION	GOBP_NEGATIVE_REGULATION_OF_INTERLEUKIN_1_PRODUCTION	32	0.648323	1.76368	0.00306475	0.029042	0.023292	1854	tags=41%, list=10%, signal=37%	CX3CR1/CARD16/MEFV/APOA1/TNFAIP3/GSTP1/NLRP12/CARD8/ARRB2/CX3CL1/SERPINB1/ZC3H12A/CD33
GOMF_TRANSLATION_REGULATOR_ACTIVITY_NUCLEIC_ACID_BINDING	GOMF_TRANSLATION_REGULATOR_ACTIVITY_NUCLEIC_ACID_BINDING	93	-0.481129	-1.58279	0.0030771	0.0291168	0.023352	3643	tags=46%, list=19%, signal=38%	EIF2B2/EIF3B/EIF3D/TSFM/EIF1AY/RPS27L/EIF1AD/EIF2S1/EIF2B4/EIF4A2/MCTS1/EIF6/TYMS/ETF1/EIF2B1/PAIP2/EIF4H/EIF5B/EIF3E/CELF1/GTPBP2/PURA/EIF3H/EIF3J/ABCF1/MTIF2/EIF1AX/EIF3A/EIF4G3/EIF3M/EIF4G2/GFM1/LARP1/EIF2B3/HBS1L/CPEB4/DENR/BOLL/PAIP1/COPS5/DHFR/DHX29/EIF5A2
GOBP_REGULATION_OF_NEUTROPHIL_CHEMOTAXIS	GOBP_REGULATION_OF_NEUTROPHIL_CHEMOTAXIS	27	0.68245	1.80121	0.00308982	0.0291951	0.0234148	1982	tags=52%, list=10%, signal=47%	RAC2/IL23A/BST1/CCR7/CD74/C5AR1/C3AR1/NCKAP1L/LBP/MPP1/NOD2/MDK/CCL19/CCL21
GOMF_RAGE_RECEPTOR_BINDING	GOMF_RAGE_RECEPTOR_BINDING	10	0.8444	1.77089	0.00310244	0.029272	0.0234765	1230	tags=50%, list=6%, signal=47%	S100A8/S100A12/S100A4/FPR1/S100B
GOBP_FC_EPSILON_RECEPTOR_SIGNALING_PATHWAY	GOBP_FC_EPSILON_RECEPTOR_SIGNALING_PATHWAY	113	0.45485	1.54288	0.00310788	0.0292811	0.0234838	2152	tags=20%, list=11%, signal=18%	IGLV1-44/ITK/LCP2/FCER1G/FCER1A/PSMB9/SYK/LYN/PSMB8/FOS/BTK/NFATC2/MALT1/VAV3/RELA/PRKCQ/NFKB1/PSME1/PSME2/VAV1/IGKC/CALM1/TAB2
GOBP_NEGATIVE_REGULATION_OF_TRANSMEMBRANE_RECEPTOR_PROTEIN_SERINE_THREONINE_KINASE_SIGNALING_PATHWAY	GOBP_NEGATIVE_REGULATION_OF_TRANSMEMBRANE_RECEPTOR_PROTEIN_SERINE_THREONINE_KINASE_SIGNALING_PATHWAY	119	-0.462011	-1.56208	0.0031625	0.0297529	0.0238622	1075	tags=18%, list=6%, signal=17%	LTBP1/IGSF1/CRIM1/ZNF451/CAV1/RBPMS2/ONECUT2/TOB1/HIPK2/SMAD2/MTMR4/CD109/GREM1/GREM2/STRAP/BAMBI/PMEPA1/DLX1/PEG10/SFRP2/DKK1
GOBP_NEUROINFLAMMATORY_RESPONSE	GOBP_NEUROINFLAMMATORY_RESPONSE	35	0.624525	1.71946	0.00318171	0.0298907	0.0239727	2779	tags=51%, list=15%, signal=44%	PTPRC/MMP9/TNFRSF1B/IL33/IL1B/ATM/LRRK2/CX3CL1/IFNG/STAP1/CST7/CD200/GRN/SYT11/TREM2/CCL3/NUPR1/TNF
GOBP_RESPONSE_TO_COPPER_ION	GOBP_RESPONSE_TO_COPPER_ION	37	0.630045	1.75767	0.00320716	0.0300867	0.0241299	898	tags=24%, list=5%, signal=23%	MT1X/MT1G/MT2A/MT1F/MT1M/ICAM1/MT1H/CYP1A2/AQP1
GOBP_CD8_POSITIVE_ALPHA_BETA_T_CELL_DIFFERENTIATION	GOBP_CD8_POSITIVE_ALPHA_BETA_T_CELL_DIFFERENTIATION	14	0.795656	1.78974	0.00325062	0.0304507	0.0244219	1096	tags=43%, list=6%, signal=40%	RUNX3/TNFSF8/IRF1/BCL2/NCKAP1L/EOMES
GOCC_SMALL_SUBUNIT_PROCESSOME	GOCC_SMALL_SUBUNIT_PROCESSOME	33	-0.635061	-1.74269	0.00330419	0.0309084	0.0247889	2815	tags=39%, list=15%, signal=34%	UTP6/NOP56/NOP58/RRP9/EMG1/HEATR1/WDR3/MPHOSPH10/UTP18/UTP23/WDR36/DCAF13/PRKDC
GOBP_KERATINIZATION	GOBP_KERATINIZATION	209	-0.396122	-1.43158	0.00333246	0.0311284	0.0249653	665	tags=5%, list=3%, signal=5%	HRNR/PKP4/DSP/DSC2/PI3/KRT7/KRT23/DSG2/KRT19/KRT20
GOMF_NEUROPEPTIDE_HORMONE_ACTIVITY	GOMF_NEUROPEPTIDE_HORMONE_ACTIVITY	27	-0.691395	-1.80831	0.00334207	0.0311736	0.0250017	507	tags=15%, list=3%, signal=14%	CALCB/VGF/NTS/PENK
GOBP_REGULATION_OF_DENDRITIC_CELL_CHEMOTAXIS	GOBP_REGULATION_OF_DENDRITIC_CELL_CHEMOTAXIS	10	0.841134	1.76404	0.00340328	0.0316994	0.0254233	1982	tags=60%, list=10%, signal=54%	CCR7/SLAMF8/CALR/LGALS9/TNFSF18/CCL21
GOBP_POSITIVE_REGULATION_OF_NEUTROPHIL_MIGRATION	GOBP_POSITIVE_REGULATION_OF_NEUTROPHIL_MIGRATION	26	0.691328	1.80801	0.00343836	0.0319807	0.0256489	1982	tags=46%, list=10%, signal=41%	RAC2/IL23A/CCR7/CD74/C5AR1/C3AR1/NCKAP1L/LBP/CD99/MDK/CCL19/CCL21
GOMF_GTPASE_ACTIVATOR_ACTIVITY	GOMF_GTPASE_ACTIVATOR_ACTIVITY	244	0.387616	1.42937	0.00344546	0.0319995	0.025664	2467	tags=22%, list=13%, signal=19%	ARHGAP15/ARHGDIB/ARHGAP30/TAGAP/ARHGEF6/ARHGAP9/DOCK2/ACAP1/ARHGAP25/RGS10/RGS18/DEPDC1/IQGAP1/ARAP2/SMAP2/RANBP3L/ABR/RASA3/RGS1/NCKAP1L/PREX1/RABGAP1L/FAM13A/HTR2B/ARAP1/RGS2/RAP1GAP2/VAV3/ARHGEF1/TBC1D9/LRRK2/SH3BP1/GMIP/ARHGAP4/DLC1/RABEP1/RAP1GAP/ACAP2/TBC1D10C/ARRB1/ARHGAP24/ARHGAP26/SIPA1/ARHGAP10/ADAP1/TBC1D2B/RIN3/TBC1D10B/THY1/ARHGAP31/RASAL3/JUN/BNIP2
GOBP_NEUTRAL_LIPID_CATABOLIC_PROCESS	GOBP_NEUTRAL_LIPID_CATABOLIC_PROCESS	46	0.571908	1.68371	0.00345016	0.0319995	0.025664	2002	tags=33%, list=11%, signal=29%	FABP1/FABP4/APOA1/FABP3/CPS1/LIPC/MGLL/APOA5/ABHD12B/ABHD6/PIK3CG/PLIN5/APOC2/APOC3/FABP5
GOBP_ANTIMICROBIAL_HUMORAL_IMMUNE_RESPONSE_MEDIATED_BY_ANTIMICROBIAL_PEPTIDE	GOBP_ANTIMICROBIAL_HUMORAL_IMMUNE_RESPONSE_MEDIATED_BY_ANTIMICROBIAL_PEPTIDE	63	0.545208	1.69237	0.00349603	0.032379	0.0259684	972	tags=21%, list=5%, signal=20%	GNLY/CXCL9/S100A12/CXCL10/CXCL14/PGC/RNASE6/DEFB1/CXCL11/CXCL2/ANG/CXCL13/RPS19
GOBP_NEGATIVE_REGULATION_OF_DNA_BINDING_TRANSCRIPTION_FACTOR_ACTIVITY	GOBP_NEGATIVE_REGULATION_OF_DNA_BINDING_TRANSCRIPTION_FACTOR_ACTIVITY	151	0.437033	1.52326	0.00350893	0.0324384	0.026016	2819	tags=32%, list=15%, signal=28%	NLRC5/NLRC3/IRAK3/AIM2/KLF4/FLNA/PTGIS/ESR1/TNFAIP3/NFKBIA/HMOX1/NLRP12/CARD8/ARRB2/EOMES/HAVCR2/COMMD6/TRAF3/SIK1/PRMT2/HAND2/ZC3H12A/SFRP5/CD200/PRNP/NOD2/PYCARD/ID3/SFRP4/CYLD/RBCK1/TMSB4X/GLIS2/ARRB1/RB1/PLA2G10/SP100/TWIST1/CDKN2A/DAP/FAF1/GFI1/HDAC4/NFKBIE/NUPR1/TRIM21/COMMD7/WWP2/BHLHE40
GOMF_SULFUR_COMPOUND_TRANSMEMBRANE_TRANSPORTER_ACTIVITY	GOMF_SULFUR_COMPOUND_TRANSMEMBRANE_TRANSPORTER_ACTIVITY	47	-0.576192	-1.70811	0.00351234	0.0324384	0.026016	3195	tags=38%, list=17%, signal=32%	ABCC3/SLC35B2/SLC25A30/SLC35B3/SLC25A14/ABCC10/ABCC4/SLC5A6/SLC3A1/SLC26A2/ABCG2/SLC7A9/SLC26A6/GJA1/SLC19A2/SLC7A11/SLC13A3/SLC26A10
GOBP_ANTIGEN_PROCESSING_AND_PRESENTATION_OF_EXOGENOUS_PEPTIDE_ANTIGEN_VIA_MHC_CLASS_I	GOBP_ANTIGEN_PROCESSING_AND_PRESENTATION_OF_EXOGENOUS_PEPTIDE_ANTIGEN_VIA_MHC_CLASS_I	78	0.499878	1.60681	0.00352653	0.0324923	0.0260592	2004	tags=28%, list=11%, signal=25%	CYBB/FCER1G/CYBA/TAP1/IFI30/CLEC4A/PSMB9/NCF2/HLA-F/HLA-E/PSMB8/HLA-B/HLA-C/TAPBP/CALR/TAP2/HLA-A/PSME1/PSME2/CD207/HLA-H/B2M
GOBP_NEGATIVE_REGULATION_OF_MAP_KINASE_ACTIVITY	GOBP_NEGATIVE_REGULATION_OF_MAP_KINASE_ACTIVITY	74	0.521913	1.66613	0.0035281	0.0324923	0.0260592	2555	tags=34%, list=13%, signal=29%	PTPN22/DUSP2/IRAK3/PTPN6/LYN/CD300A/UCHL1/IL1B/GSTP1/DUSP7/PRKCD/RGS2/DUSP10/HIPK3/BMP4/APOE/LAX1/DUSP1/SFRP1/PTPN1/DUSP5/DUSP4/PDCD4/PTPRJ/SH2B3
GOBP_RNA_3_END_PROCESSING	GOBP_RNA_3_END_PROCESSING	117	-0.463053	-1.56967	0.00358094	0.0329326	0.0264124	4118	tags=36%, list=22%, signal=28%	CPSF2/CPSF6/NCBP1/NCBP2/LARP7/GRSF1/PTCD1/DKC1/CPSF4/CLP1/TRNT1/NUDT21/EXOSC8/DHX36/EXOSC9/MAGOHB/ZNF473/EXOSC7/EIF4A3/RNF20/INTS7/CPSF3/CSTF1/PABPC1L/VIRMA/SLU7/CSTF3/EXOSC3/SSB/MTPAP/CDC73/THOC7/THOC2/CASC3/INTS2/CTR9/PNPT1/INTS8/CCNB1/RPRD1A/LIN28B/LIN28A
GOMF_TUMOR_NECROSIS_FACTOR_RECEPTOR_SUPERFAMILY_BINDING	GOMF_TUMOR_NECROSIS_FACTOR_RECEPTOR_SUPERFAMILY_BINDING	45	0.606014	1.77413	0.0035959	0.0329646	0.026438	1690	tags=36%, list=9%, signal=32%	TNFSF13B/TNFSF10/TNFSF8/LTB/SIVA1/MYD88/STAT1/TRAF1/CASP8/TNFSF14/CFLAR/TRAF3/CD40LG/TNFSF18/TRADD/TNFSF12
GOBP_POSITIVE_REGULATION_OF_PROTEIN_CONTAINING_COMPLEX_ASSEMBLY	GOBP_POSITIVE_REGULATION_OF_PROTEIN_CONTAINING_COMPLEX_ASSEMBLY	222	0.396536	1.44797	0.00359864	0.0329646	0.026438	1343	tags=15%, list=7%, signal=14%	CORO1A/GBP5/LCP1/PLEK/CCR7/SKAP1/GMFG/HCK/CLEC7A/SYK/CDC42EP3/GSN/EVL/PTK2B/ICAM1/ESR1/NCKAP1L/MSN/ATM/FCHSD2/ARPC2/VASP/CXCL13/NAV3/PFN1/LGALS3/TLR4/NIN/WASF2/CTNNA2/CORO1B/TP53/IFNG
GOBP_POSITIVE_REGULATION_OF_CALCIUM_MEDIATED_SIGNALING	GOBP_POSITIVE_REGULATION_OF_CALCIUM_MEDIATED_SIGNALING	28	0.648223	1.71915	0.00359952	0.0329646	0.026438	2779	tags=36%, list=15%, signal=31%	TRAT1/CD3E/CD4/SYK/ZAP70/CIB1/TREM2/CCL3/ADA/TNF
GOCC_APICAL_JUNCTION_COMPLEX	GOCC_APICAL_JUNCTION_COMPLEX	124	-0.449497	-1.52827	0.00368895	0.033691	0.0270206	3774	tags=37%, list=20%, signal=30%	MARVELD3/MTDH/AMOTL1/TBCD/CYTH2/RAPGEF2/MAGI1/RAB13/RAP2C/TJAP1/POF1B/PARD6G/LIN7A/CTNND1/PRKCI/CLDN20/CLDN15/PLEKHA7/JUP/PARD3/VAPA/PLXDC1/ECT2/TJP1/DLG1/APC/PKN2/CLDN11/CCND1/PDCD6IP/EPPK1/LIN7C/CGN/OCLN/CLDN22/CLDN7/CTNNA1/CXADR/CLDN6/CLDN18/CLDN4/WNK3/EPCAM/PARD6B/MARVELD2/CLDN10
GOBP_CHRONIC_INFLAMMATORY_RESPONSE	GOBP_CHRONIC_INFLAMMATORY_RESPONSE	19	0.74821	1.80958	0.00368914	0.033691	0.0270206	836	tags=32%, list=4%, signal=30%	S100A8/CCL5/IDO1/VCAM1/TNFAIP3/CXCL13
GOBP_REGULATION_OF_TOLERANCE_INDUCTION	GOBP_REGULATION_OF_TOLERANCE_INDUCTION	17	0.776529	1.82576	0.00370431	0.0337825	0.027094	3823	tags=82%, list=20%, signal=66%	IDO1/CD3E/LILRB2/IRAK3/HLA-B/HAVCR2/IL2RA/CBLB/LILRB4/PHLPP1/HMGB1/TGFBR2/CLC/CD274
GOBP_REGULATION_OF_CELLULAR_EXTRAVASATION	GOBP_REGULATION_OF_CELLULAR_EXTRAVASATION	32	0.642249	1.74716	0.00371196	0.0338052	0.0271122	2391	tags=47%, list=13%, signal=41%	ITGA4/BST1/PTGER4/CXCL12/CCR2/PTAFR/ICAM1/SELP/CD99/MDK/CCL21/RIPK3/CCL25/PLVAP/THY1
GOCC_CYTOSOLIC_LARGE_RIBOSOMAL_SUBUNIT	GOCC_CYTOSOLIC_LARGE_RIBOSOMAL_SUBUNIT	55	0.558844	1.70593	0.00378705	0.0344411	0.0276222	3488	tags=51%, list=18%, signal=42%	RPL21/RPL13/RPL18/RPL28/RPL35/RPL39L/RPL18A/RPL13A/RPL29/RPL7A/RPL41/RPLP2/RPLP1/RPL3/RPL24/RPL11/RPL36AL/RPL10/RPL12/RPL10A/RPL6/RPL4/RPL37/RPL34/RPL8/RPL37A/RPL19/RPL9
GOMF_TRANSFERASE_ACTIVITY_TRANSFERRING_ONE_CARBON_GROUPS	GOMF_TRANSFERASE_ACTIVITY_TRANSFERRING_ONE_CARBON_GROUPS	162	-0.421074	-1.48118	0.00379946	0.0344586	0.0276362	4694	tags=40%, list=25%, signal=30%	SETD5/LCMT1/TRMT5/AMT/MEPCE/PCMT1/TGS1/TRMT112/RBBP5/CARM1/SUV39H2/TFB1M/FTSJ3/THUMPD2/ICMT/SETDB1/LCMT2/NSUN5/HEMK1/NSUN4/RRP8/METTL2A/GART/METTL14/TPMT/FAM98A/MTR/FAM98B/NOP2/TYMS/PCMTD1/FBXO11/N6AMT1/METTL2B/NSUN5P2/TYW3/AS3MT/TRMT12/EMG1/EHMT2/SETD7/METTL1/SUZ12/BHMT2/COQ3/METTL6/TRMT11/PCMTD2/TRMT6/ALDH1L1/PRMT5/NSUN2/BHMT/ATIC/CAD/SMYD1/TRMT61B/METTL5/TFB2M/PRMT3/SMYD2/SMYD3/TARBP1/GNMT
GOBP_POSITIVE_REGULATION_OF_PROTEOLYSIS	GOBP_POSITIVE_REGULATION_OF_PROTEOLYSIS	340	0.3642	1.37069	0.00379949	0.0344586	0.0276362	3234	tags=31%, list=17%, signal=26%	S100A8/FYN/CASP1/PYHIN1/ATP2A3/LAPTM5/CLEC7A/FAS/TNFSF10/LCK/SYK/LYN/RNF19B/AIM2/GSN/MEFV/TNFRSF1B/PTK2B/IL33/IFI16/AKT1/ARL6IP5/IL1B/NLRP1/CAPN3/CIDEB/CASP8/NGFR/MALT1/NLRP12/ADRA2A/CFLAR/CARD8/AURKAIP1/LGALS9/LGMN/PRICKLE1/JAK2/DAPK1/RIPK2/LRRK2/CASP10/IFNG/KLKB1/BOK/SIRT2/RNF185/CCBE1/ZC3H12A/P2RX1/PIAS1/DLC1/FAM122A/PSME1/PMAIP1/APOE/GRN/STAT3/PSME2/ANP32B/TRADD/PYCARD/SRC/CDC20/F2R/ARRB1/S10…
GOBP_ACUTE_INFLAMMATORY_RESPONSE_TO_ANTIGENIC_STIMULUS	GOBP_ACUTE_INFLAMMATORY_RESPONSE_TO_ANTIGENIC_STIMULUS	22	0.709778	1.78613	0.00380916	0.0344984	0.0276682	1668	tags=36%, list=9%, signal=33%	CCR7/FCGR2B/PLA2G2D/ICAM1/HLA-E/BTK/GATA3/CNR1
GOBP_MESODERM_MORPHOGENESIS	GOBP_MESODERM_MORPHOGENESIS	63	-0.545346	-1.70028	0.00384463	0.0347716	0.0278873	1799	tags=19%, list=9%, signal=17%	TXNRD1/ITGB1/PRKAR1A/EPB41L5/SMAD2/BMPR1A/TBX3/GJA1/ITGA2/HMGA2/SFRP2/DKK1
GOBP_NEGATIVE_REGULATION_OF_RESPONSE_TO_CYTOKINE_STIMULUS	GOBP_NEGATIVE_REGULATION_OF_RESPONSE_TO_CYTOKINE_STIMULUS	59	0.565524	1.72548	0.00390094	0.0352322	0.0282567	1581	tags=25%, list=8%, signal=23%	PTPRC/CCL5/NLRC5/CARD16/IRAK3/SAMHD1/APOA1/KLF4/PADI2/GSTP1/CARD8/CCDC3/IL1RN/STAP1/PTPN2
GOBP_TRANSPORT_ALONG_MICROTUBULE	GOBP_TRANSPORT_ALONG_MICROTUBULE	139	-0.430056	-1.48913	0.00397329	0.0358363	0.0287411	3937	tags=31%, list=21%, signal=25%	BLOC1S2/RABL2B/SPG11/MAK/HNRNPU/TRAF3IP1/SFPQ/TTC30A/RAB21/TRIP11/IFT20/CLN3/VAMP7/PURA/TUB/RAB1A/IFT80/KIF3B/RPGR/OPA1/DYNC1I2/AP3S1/SPAST/IFT27/KIFAP3/IFT81/KIF1B/KIF5B/AP3B1/SSX2IP/DYNC2H1/FBXW11/WDR35/DYNC2LI1/RHOT1/TNPO1/RAB27B/LRPPRC/WASF1/SYBU/MAP2/COPG2/KIF3A
GOBP_CELL_CELL_JUNCTION_ORGANIZATION	GOBP_CELL_CELL_JUNCTION_ORGANIZATION	193	-0.412615	-1.47813	0.00399896	0.0360182	0.028887	3212	tags=29%, list=17%, signal=24%	POF1B/PARD6G/VEGFA/CTNND1/PRKCI/CLDN20/CLDN15/PLEKHA7/EXT1/ZNF703/JUP/CTNNB1/GRHL1/PARD3/CD9/PVR/CDH13/ECT2/PERP/GJB6/CDH9/TJP1/CAV1/DLG1/APC/PKN2/CLDN11/ACE2/PDCD6IP/CDH6/PRKCA/GNPAT/ADAM10/CADM1/ROCK2/OCLN/CLDN22/CLDN7/CTNNA1/F2RL1/SNAI2/CXADR/PKP4/GJC1/CLDN6/CLDN18/CLDN4/RDX/DSP/PARD6B/MARVELD2/GJA1/CLDN10/DLG5/CTNND2/DSG2
GOMF_ENZYME_INHIBITOR_ACTIVITY	GOMF_ENZYME_INHIBITOR_ACTIVITY	342	0.362554	1.36804	0.00400699	0.0360409	0.0289053	1974	tags=22%, list=10%, signal=20%	LXN/GMFG/RARRES1/SPOCK2/CARD16/RHOH/SERPINA12/PZP/ANXA1/TNFAIP8/SERPINA7/SPP2/SERPINA11/TIMP1/APOA1/IQGAP1/RPS6KA1/SERPINB9/TXNIP/PPP1R9B/BIRC3/CDKN2C/CDC42SE1/SERPINA6/SERPINB8/OAZ1/SERPINF2/PAPLN/PTN/SKI/CST3/CD27/LGALS3/TNFSF14/GCHFR/SERPINA3/BST2/DYNLL1/TNK2/TIMP2/SPINT2/ATP2B4/CIB1/LRRK2/ITIH4/CDKN2D/SERPINA10/CSTA/ITIH1/PDC/SMR3A/PLN/PDE6D/ANXA5/OAZ2/SERPINB1/SERPINA1/CST7/PPP1R1A/TIMP3/APO…
GOBP_RESPONSE_TO_AMYLOID_BETA	GOBP_RESPONSE_TO_AMYLOID_BETA	43	0.586317	1.69984	0.00404953	0.0363736	0.0291721	1726	tags=35%, list=9%, signal=32%	FYN/ITGA4/MMP9/VCAM1/FCGR2B/ICAM1/RAMP3/NGFR/TLR4/LGMN/LRP1/CASP4/ABCC1/MMP2/PRNP
GOBP_PROGRAMMED_NECROTIC_CELL_DEATH	GOBP_PROGRAMMED_NECROTIC_CELL_DEATH	42	0.595718	1.71962	0.00405815	0.036401	0.0291941	2914	tags=50%, list=15%, signal=42%	CASP1/FAS/MLKL/BIRC3/CD14/CASP8/ASAH1/TLR4/CFLAR/TP53/BOK/ALKBH7/CYLD/RBCK1/LY96/RIPK3/MAP3K5/ARHGEF2/NUPR1/TNF/IRF3
GOCC_APICAL_PLASMA_MEMBRANE	GOCC_APICAL_PLASMA_MEMBRANE	322	-0.35262	-1.33359	0.00408075	0.0365537	0.0293165	3029	tags=24%, list=16%, signal=21%	SLC23A2/PRKCI/KCNE4/PODXL/EMP2/SLC38A3/HAX1/ATP2B1/DDR2/SLC23A1/SLC22A18/ENPEP/SLC2A5/ATP6V1A/PARD3/JAG1/CEACAM1/OXTR/SLC15A1/STX3/SORBS2/PRKAA1/KCNK1/GJB6/DLG1/ATP1A1/ABCC4/TMEM30A/SLC5A6/ABCC2/ACE2/SLC7A1/CNKSR3/HSP90AB1/RAB18/SLC46A1/ENPP3/ABCB1/FOLR1/SLC3A2/SCNN1A/SLC26A2/ERBB3/CD36/OCLN/SLC9A3/PFKM/ANO1/SLC12A1/MAL2/ABCG2/ATP8B1/RAB27B/ATP1B1/SLC29A1/LMO7/SLC16A1/SLC7A9/CLDN4/SHANK2/RDX/SLC2…
GOBP_NEGATIVE_REGULATION_OF_VIRAL_GENOME_REPLICATION	GOBP_NEGATIVE_REGULATION_OF_VIRAL_GENOME_REPLICATION	49	0.572876	1.71759	0.0040938	0.0365705	0.02933	2852	tags=47%, list=15%, signal=40%	CCL5/IFITM1/APOBEC3C/APOBEC3A/OAS2/ISG20/IFI16/ISG15/APOBEC3G/OASL/FAM111A/BST2/MX1/IFITM3/IFITM2/APOBEC3F/PLSCR1/ZC3HAV1/MPHOSPH8/OAS3/TNF/INPP5K/OAS1
GOBP_NUCLEOTIDE_BINDING_OLIGOMERIZATION_DOMAIN_CONTAINING_2_SIGNALING_PATHWAY	GOBP_NUCLEOTIDE_BINDING_OLIGOMERIZATION_DOMAIN_CONTAINING_2_SIGNALING_PATHWAY	12	0.817646	1.79563	0.0040938	0.0365705	0.02933	1753	tags=67%, list=9%, signal=61%	PTPN22/SLC15A3/TNFAIP3/NFKBIA/TLR4/RELA/RIPK2/NOD2
GOBP_NEGATIVE_REGULATION_OF_REGULATED_SECRETORY_PATHWAY	GOBP_NEGATIVE_REGULATION_OF_REGULATED_SECRETORY_PATHWAY	20	0.724686	1.79536	0.00411086	0.0366729	0.0294121	1065	tags=50%, list=6%, signal=47%	IL13RA2/FCGR2B/CCR2/CD84/CD300A/HLA-F/GNAI2/HMOX1/ADRA2A/LGALS9
GOBP_RESPONSE_TO_INTERLEUKIN_1	GOBP_RESPONSE_TO_INTERLEUKIN_1	188	0.412613	1.47181	0.00413653	0.0368016	0.0295154	2673	tags=30%, list=14%, signal=26%	CCL5/CD38/CCL2/IRAK3/CCL18/ANXA1/ETS1/GBP1/PSMB9/KLF2/MYD88/ICAM1/PTGIS/PSMB8/GBP2/IL1B/NFKBIA/MAP3K3/LGALS9/IL1RAP/RELA/IGBP1/RIPK2/PELI2/IRAK4/CX3CL1/CD40/IL1RN/PCK1/CCL8/CCL20/ZC3H12A/FGB/NFKB1/PSME1/PSME2/SFRP1/NOD2/PYCARD/SRC/CCL19/USP10/CCL21/TAB2/SIRPA/CCL25/MAP3K8/CCL3/CCL23/RPS6KA5/APP/MAPK3/TANK/HDAC4/MTHFR/UBC
GOBP_RESPONSE_TO_KETONE	GOBP_RESPONSE_TO_KETONE	188	0.412727	1.47222	0.00413653	0.0368016	0.0295154	2624	tags=30%, list=14%, signal=26%	CD38/CYBB/CCR7/PTGER2/GNG2/PTGER4/AVPR1A/PTGFR/FOSB/NQO1/KLF2/PTAFR/TSPO/ICAM1/KLF4/TXNIP/AKR1B1/AKT1/ASS1/PPP1R9B/FOS/MSN/TLR2/CFTR/FIBIN/CPS1/PTN/AQP1/MAP4K1/CFLAR/CALR/RELA/TGFBR3/ADCY3/NCOA1/PCK1/CBL/PLN/FOXO1/DUSP1/SFRP1/CA9/SRC/CCL19/NR1H3/CCL21/DCPS/CALM1/TGFB3/GNB1/CALM3/ADAM15/IGFBP7/SLIT2/ELK1/ARG1/AR
GOBP_REGULATION_OF_PHOSPHATIDYLINOSITOL_3_KINASE_ACTIVITY	GOBP_REGULATION_OF_PHOSPHATIDYLINOSITOL_3_KINASE_ACTIVITY	52	0.565483	1.69894	0.00415387	0.0368624	0.0295641	2434	tags=38%, list=13%, signal=34%	CCR7/FGR/PDGFRA/PIK3R5/LYN/PIK3IP1/PTK2B/KLF4/TEK/VAV3/FLT3/SLA2/SOCS3/NOD2/SRC/CCL19/CCL21/CISH/P2RY12/KIT
GOBP_CELLULAR_RESPONSE_TO_PEPTIDE_HORMONE_STIMULUS	GOBP_CELLULAR_RESPONSE_TO_PEPTIDE_HORMONE_STIMULUS	302	0.372033	1.38689	0.00415462	0.0368624	0.0295641	3075	tags=28%, list=16%, signal=24%	PRKCB/FYN/UCP2/JAK3/SERPINA12/PIP4K2A/LYN/ACTN2/PTPRE/ADCY7/CRHBP/AKT1/CCND3/ATP6V0C/ASS1/MAX/ATP6V1B2/GNAI2/IL1B/NR4A2/GSTP1/ECHDC3/RAB8B/RAB31/CPS1/SLC39A14/ATP6V0D1/PRKCD/CFLAR/RELA/JAK2/PRKCQ/LPIN2/ADCY3/INHBB/PCK1/PRKACB/VAMP2/AKT2/STAT5A/APRT/NFKB1/PTPN2/PRKAR2B/STAT3/FOXO1/XBP1/SOCS3/ATP6AP1/MYO5A/GHR/PXN/PTPN1/AGTRAP/SRC/SP1/EIF4EBP2/GCK/GPR21/OSBPL8/CRK/ATP6V0B/RAP1B/ADCY4/ATP6V0A2/ZDHHC…
GOBP_NEGATIVE_REGULATION_OF_INTERLEUKIN_1_BETA_PRODUCTION	GOBP_NEGATIVE_REGULATION_OF_INTERLEUKIN_1_BETA_PRODUCTION	26	0.686344	1.79498	0.00416172	0.0368754	0.0295745	2659	tags=54%, list=14%, signal=46%	CX3CR1/CARD16/MEFV/APOA1/TNFAIP3/GSTP1/CARD8/ARRB2/CX3CL1/SERPINB1/ZC3H12A/CD33/TREM2/LILRB4
GOBP_REGULATION_OF_UNSATURATED_FATTY_ACID_BIOSYNTHETIC_PROCESS	GOBP_REGULATION_OF_UNSATURATED_FATTY_ACID_BIOSYNTHETIC_PROCESS	12	0.817526	1.79537	0.00417032	0.0369017	0.0295956	718	tags=33%, list=4%, signal=32%	CD74/AVPR1A/ANXA1/IL1B
GOBP_JNK_CASCADE	GOBP_JNK_CASCADE	181	0.426115	1.51426	0.00420341	0.0371443	0.0297902	3181	tags=33%, list=17%, signal=28%	PTPN22/CCR7/ARHGEF6/RASSF2/PTGER4/FCGR2B/SYK/MLKL/RASGRP1/MYD88/PTK2B/AKT1/IL1B/GSTP1/TRAF1/SERPINF2/RAPGEF1/CD27/MAP4K1/GADD45B/TLR4/RIPK2/TRAF3/GADD45G/IRAK4/DUSP10/SLAMF1/CD40LG/HIPK3/MDFIC/SFRP1/NOD2/PTPN1/PYCARD/CYLD/MFHAS1/CCL19/AMBP/PER1/CCL21/DBNL/TAB2/SIRPA/TNIK/NCOR1/SH2D3C/PDCD4/APP/MAP3K5/UBC/TNF/ERN1/UBA52/AGER/DAXX/PHLPP1/HMGB1/UBB/RIPK1/DACT1
GOCC_PLATELET_ALPHA_GRANULE	GOCC_PLATELET_ALPHA_GRANULE	87	0.493971	1.60465	0.00422728	0.0373049	0.029919	2951	tags=43%, list=16%, signal=36%	FERMT3/SRGN/F13A1/HGF/ORM2/ACTN2/A1BG/TIMP1/ORM1/PECAM1/SERPINF2/FGA/SERPINA3/SELP/FGG/VEGFB/PLG/SERPINA1/FGB/MMRN1/ALB/ALDOA/PPBP/VEGFC/TMSB4X/HRG/PCYOX1L/CLU/TGFB3/PF4/ISLR/APP/SERPING1/KNG1/AHSG/TGFB1/ACTN1
GOBP_REGULATION_OF_HUMORAL_IMMUNE_RESPONSE_MEDIATED_BY_CIRCULATING_IMMUNOGLOBULIN	GOBP_REGULATION_OF_HUMORAL_IMMUNE_RESPONSE_MEDIATED_BY_CIRCULATING_IMMUNOGLOBULIN	13	0.793413	1.75502	0.00424933	0.037449	0.0300346	2779	tags=62%, list=15%, signal=53%	PTPRC/FCGR2B/PTPN6/HPX/NOD2/C4BPA/CR1/TNF
GOBP_POSITIVE_REGULATION_OF_OSTEOCLAST_DIFFERENTIATION	GOBP_POSITIVE_REGULATION_OF_OSTEOCLAST_DIFFERENTIATION	25	0.688963	1.7758	0.00427332	0.0376098	0.0301635	1704	tags=36%, list=9%, signal=33%	IL23A/CCR1/FOS/TYROBP/NOTCH2/IFNG/GPR68/GNAS/ATP6AP1
GOBP_ENDOPLASMIC_RETICULUM_TO_GOLGI_VESICLE_MEDIATED_TRANSPORT	GOBP_ENDOPLASMIC_RETICULUM_TO_GOLGI_VESICLE_MEDIATED_TRANSPORT	187	-0.416027	-1.49181	0.00433843	0.0381147	0.0305684	3968	tags=38%, list=21%, signal=30%	HYOU1/CD59/ARCN1/TMED2/SEC24D/TRAPPC6B/LMAN2/DYNC1LI1/SEC24B/SEC23IP/COG6/BET1L/ZW10/F5/TRAPPC2/SEC22B/SEC23A/TRAPPC4/GOSR1/NRBP2/GOLT1A/ERGIC1/TRIP11/ERGIC3/TMED9/PGAP1/SEC31A/ARFGAP3/VAMP7/COG2/VAPA/COPA/TGFA/TMED3/MIA2/SEC23B/RAB1A/TMED7/SAR1B/PREB/ARF4/CREB3L2/COG5/TFG/DYNC1I2/PDCD6/SPAST/GOSR2/NSF/BET1/RNF139/SCFD1/ANKRD28/SEC16B/FOLR1/COPB1/INSIG1/MCFD2/CD55/CNIH4/BCAP29/SEC24A/YIPF5/KLHL12…
GOBP_MUSCLE_CELL_FATE_COMMITMENT	GOBP_MUSCLE_CELL_FATE_COMMITMENT	16	-0.776714	-1.81417	0.00434232	0.0381147	0.0305684	631	tags=12%, list=3%, signal=12%	TBX3/DKK1
GOMF_PHOSPHOTYROSINE_RESIDUE_BINDING	GOMF_PHOSPHOTYROSINE_RESIDUE_BINDING	44	0.603726	1.76152	0.0043548	0.038173	0.0306153	3243	tags=45%, list=17%, signal=38%	FGR/HCK/SAMSN1/LCK/SYK/PTPN6/PFN1/ZAP70/CBL/STAP1/SOCS3/VAV1/SH3BP2/CRK/SH2D3C/CBLB/MAPK3/GRB2/PIK3R3/LDLRAP1
GOBP_RESPONSE_TO_INTERLEUKIN_2	GOBP_RESPONSE_TO_INTERLEUKIN_2	14	0.785919	1.76783	0.00436848	0.0382417	0.0306703	1679	tags=57%, list=9%, signal=52%	IL2RB/IL2RG/JAK3/SYK/PTK2B/STAT5A/PTPN2/IL2RA
GOBP_CELL_CYCLE_G2_M_PHASE_TRANSITION	GOBP_CELL_CYCLE_G2_M_PHASE_TRANSITION	249	-0.375515	-1.38588	0.00442889	0.0387188	0.031053	4042	tags=33%, list=21%, signal=26%	CHEK1/MAPRE1/DYRK3/PSME4/PSMC4/CDK14/SYF2/PSMD10/PSMB3/FBXL6/CHMP4C/PSMB5/RAD51C/PSMC3/AVEN/VPS4B/BACH1/CDK5RAP3/YWHAE/CEP72/CEP290/ARPP19/KHDRBS1/PPP1CB/TPD52L1/PSMB4/CKAP5/ENSA/ATAD5/NAE1/CEP63/CCNA2/CEP70/CDC14B/RAD21/PSME3/PSMC5/MNAT1/PSMD4/TAOK1/TAF2/CCNH/PSMD6/PSMC2/AURKA/PPME1/HUS1/PSMA1/CCND1/NINL/DYNC1I2/PSMC6/MTA3/SKP1/CDK1/RAD17/AKAP9/RFPL1/ABCB1/NPM1/WEE1/PSMD11/PAXIP1/CEP192/TOPBP1/T…
GOCC_AZUROPHIL_GRANULE	GOCC_AZUROPHIL_GRANULE	140	0.436957	1.51308	0.00449715	0.0392294	0.0314625	2699	tags=34%, list=14%, signal=29%	LYZ/MNDA/PLAC8/CD68/ORM2/TRAPPC1/FPR1/PIGR/PADI2/ATP6V0C/MAN2B1/C3AR1/RNASET2/GM2A/ATP11B/PRKCD/SLCO4C1/SERPINA3/PRCP/BST2/NPC2/BRI3/PSAP/RAB37/GRN/ATP8A1/CAP1/STOM/IMPDH1/PYCARD/LPCAT1/GLA/HLA-H/FABP5/FTL/TMEM179B/CMTM6/RAP1B/ACTR2/CYB5R3/RAB3D/NFAM1/B4GALT1/DPP7/C3/ARG1/STXBP2
GOBP_CD4_POSITIVE_OR_CD8_POSITIVE_ALPHA_BETA_T_CELL_LINEAGE_COMMITMENT	GOBP_CD4_POSITIVE_OR_CD8_POSITIVE_ALPHA_BETA_T_CELL_LINEAGE_COMMITMENT	21	0.720869	1.80593	0.00449928	0.0392294	0.0314625	1641	tags=43%, list=9%, signal=39%	IL23A/SLAMF6/IRF4/SPN/BCL2/LY9/IL12RB1/TNFSF18/STAT3
GOBP_POSITIVE_REGULATION_OF_WNT_SIGNALING_PATHWAY	GOBP_POSITIVE_REGULATION_OF_WNT_SIGNALING_PATHWAY	168	-0.419092	-1.47844	0.00451919	0.0393506	0.0315597	3443	tags=30%, list=18%, signal=25%	PPM1B/PSMB5/PSMC3/ARNTL/WNT5A/TNKS2/TMEM198/NLE1/COL1A1/ANKRD6/SMARCA4/LGR4/PSMB4/JUP/USP8/PSME3/PSMC5/PSMD4/CAV1/PSMD6/CSNK2A1/PSMC2/PSMA1/CAPRIN2/CSNK1G3/PSMC6/WLS/XIAP/UBE2B/EGF/DIXDC1/TMEM9/PSMD11/CDC73/SULF1/PSMD14/DEPDC1B/USP47/BMP2/RSPO2/NKD1/YAP1/UBR5/PSMD12/BAMBI/LGR5/SOX4/AXIN2/SFRP2/DKK1
GOCC_ORGANELLE_INNER_MEMBRANE	GOCC_ORGANELLE_INNER_MEMBRANE	442	-0.338359	-1.30791	0.00452577	0.0393556	0.0315637	3229	tags=25%, list=17%, signal=22%	TMEM126A/NDUFA2/MRPL27/NDUFB3/MRPL1/FECH/TOR1AIP1/TMEM14C/MRPL21/UQCRHL/STAR/MRPS33/YME1L1/SLC25A39/TYMS/COX6C/PHB/SLC25A30/NNT/MRPL39/SLC25A33/SLC25A40/TMX4/SLC25A32/NDUFA9/MRPS25/MRPL51/MATR3/MRPL42/SLC25A3/ARL6IP6/LBR/MRPS16/TIMM8B/MRPL2/FASTKD2/NDUFB5/NDUFA12/DHODH/COX7B/DPY19L1/SLC25A14/NDUFS6/AGK/CCDC51/UQCRC1/NDUFB9/ALDH18A1/NDUFAF1/HSPD1/MRPS36/UNC50/TMEM14B/MTCH2/NDUFB6/SUN1/OPA1/SLC25A2…
GOBP_VESICLE_CYTOSKELETAL_TRAFFICKING	GOBP_VESICLE_CYTOSKELETAL_TRAFFICKING	62	-0.542292	-1.68091	0.00453279	0.0393643	0.0315707	2607	tags=34%, list=14%, signal=29%	CLN3/VAMP7/MYO1E/MYO1B/RAB1A/KIF3B/MYO5C/AP3S1/KIFAP3/KIF1B/KIF5B/AP3B1/MYO19/MYO5B/WASL/FBXW11/MYO1D/MAP2/KIF3A/MYO6/FNBP1L
GOBP_REGULATION_OF_ACUTE_INFLAMMATORY_RESPONSE_TO_ANTIGENIC_STIMULUS	GOBP_REGULATION_OF_ACUTE_INFLAMMATORY_RESPONSE_TO_ANTIGENIC_STIMULUS	13	0.791207	1.75014	0.0045612	0.0395117	0.0316889	1668	tags=46%, list=9%, signal=42%	CCR7/FCGR2B/PLA2G2D/HLA-E/BTK/CNR1
GOBP_PATTERN_SPECIFICATION_PROCESS	GOBP_PATTERN_SPECIFICATION_PROCESS	406	-0.347546	-1.33862	0.00456183	0.0395117	0.0316889	1648	tags=15%, list=9%, signal=14%	GORAB/PSKH1/SENP2/GALNT11/WT1/SEMA3F/SATB2/MEIS2/EXT1/PGAP1/INTU/HOXC4/FRS2/LRP5/WDR77/PCGF2/MICAL2/APC/KIF3B/NEUROD1/AURKA/TULP3/MIB1/ERBB4/WLS/FOXH1/MKKS/BICC1/FOLR1/NRG3/AIDA/DYNC2H1/HIPK2/EPB41L5/PCSK5/ACVR2B/SEMA3A/DLX2/DYNC2LI1/SMAD2/CELSR2/BMPR1A/TBX3/SMAD5/GREM1/BMP2/NKD1/PRKDC/MEOX2/ROBO2/STC1/AXIN2/DLX1/RELN/ROBO1/HEY1/SFRP2/DNAH11/SEMA3C/MNS1/DKK1
GOBP_POSITIVE_REGULATION_OF_LEUKOCYTE_ADHESION_TO_VASCULAR_ENDOTHELIAL_CELL	GOBP_POSITIVE_REGULATION_OF_LEUKOCYTE_ADHESION_TO_VASCULAR_ENDOTHELIAL_CELL	21	0.719247	1.80186	0.00457364	0.0395617	0.031729	1821	tags=43%, list=10%, signal=39%	ITGB2/ITGA4/ETS1/PTAFR/ICAM1/ALOX5/RELA/SELP/MDK
GOBP_CATECHOL_CONTAINING_COMPOUND_METABOLIC_PROCESS	GOBP_CATECHOL_CONTAINING_COMPOUND_METABOLIC_PROCESS	44	0.599506	1.74921	0.00459019	0.0396525	0.0318018	2246	tags=30%, list=12%, signal=26%	ITGB2/ITGAM/MOXD1/AKR1B1/NR4A2/GATA3/HAND2/GPR37/GCH1/EPAS1/DRD1/COMT/PNKD
GOMF_CHEMOKINE_RECEPTOR_BINDING	GOMF_CHEMOKINE_RECEPTOR_BINDING	53	0.563363	1.70622	0.0046009	0.0396926	0.031834	2387	tags=43%, list=13%, signal=38%	CCL5/CXCL9/CXCL10/CXCL12/CXCL14/CCL2/CCL18/CCR2/DEFB1/CXCL11/CXCL2/CXCL13/CCRL2/CX3CL1/CCL8/CCL20/PPBP/CCL19/CCL21/PF4/CCL25/CCL3/CCL23
GOMF_PROTEIN_PHOSPHORYLATED_AMINO_ACID_BINDING	GOMF_PROTEIN_PHOSPHORYLATED_AMINO_ACID_BINDING	54	0.556064	1.68694	0.00461988	0.0398039	0.0319232	3243	tags=41%, list=17%, signal=34%	FGR/HCK/SAMSN1/LCK/SYK/PTPN6/PFN1/ZAP70/CBL/STAP1/SOCS3/VAV1/ARRB1/SH3BP2/CRK/SH2D3C/CBLB/MAPK3/GRB2/FBXW7/PIK3R3/LDLRAP1
GOBP_ZINC_ION_HOMEOSTASIS	GOBP_ZINC_ION_HOMEOSTASIS	38	0.610595	1.72294	0.00463901	0.0398205	0.0319366	879	tags=26%, list=5%, signal=25%	S100A8/MT1X/MT1G/MT2A/LCK/TMC8/MT1F/MT1M/MT1H/SLC39A14
GOBP_POSITIVE_REGULATION_OF_INTRACELLULAR_PROTEIN_TRANSPORT	GOBP_POSITIVE_REGULATION_OF_INTRACELLULAR_PROTEIN_TRANSPORT	159	0.416369	1.46297	0.00464801	0.0398205	0.0319366	1726	tags=18%, list=9%, signal=17%	RAC2/ITGB2/FYN/GZMB/HCLS1/ITGAM/PPP3CC/BCL2/FLNA/IL1B/ZDHHC2/OAZ1/CASP8/EDEM1/PRKCD/JAK2/CIB1/UBE2L3/TP53/IFNG/VAMP2/AKT2/OAZ2/ZC3H12A/PMAIP1/CD81/ANP32B/STOM/PRNP
GOBP_POSITIVE_REGULATION_OF_MONOCYTE_CHEMOTACTIC_PROTEIN_1_PRODUCTION	GOBP_POSITIVE_REGULATION_OF_MONOCYTE_CHEMOTACTIC_PROTEIN_1_PRODUCTION	10	0.831091	1.74298	0.00464831	0.0398205	0.0319366	3118	tags=90%, list=16%, signal=75%	CLEC7A/SYK/MCOLN2/IL1B/LGALS9/NOD2/TWIST1/AGER/HMGB1
GOMF_IGG_BINDING	GOMF_IGG_BINDING	10	0.830846	1.74246	0.00464831	0.0398205	0.0319366	268	tags=40%, list=1%, signal=39%	FCGR2B/FCER1G/FCGR3A/FCGR2A
GOBP_POSITIVE_REGULATION_BY_SYMBIONT_OF_ENTRY_INTO_HOST	GOBP_POSITIVE_REGULATION_BY_SYMBIONT_OF_ENTRY_INTO_HOST	11	0.824975	1.7724	0.00465829	0.0398205	0.0319366	1736	tags=55%, list=9%, signal=50%	CD74/CD4/HLA-DRB1/LGALS9/LGALS1/TRIM38
GOCC_NADPH_OXIDASE_COMPLEX	GOCC_NADPH_OXIDASE_COMPLEX	11	0.825279	1.77305	0.00465829	0.0398205	0.0319366	2586	tags=55%, list=14%, signal=47%	CYBB/CYBA/NCF2/NCF4/DUOX2/DUOX1
GOBP_GROWTH_HORMONE_RECEPTOR_SIGNALING_PATHWAY_VIA_JAK_STAT	GOBP_GROWTH_HORMONE_RECEPTOR_SIGNALING_PATHWAY_VIA_JAK_STAT	14	0.784777	1.76527	0.00467774	0.0399346	0.0320281	1775	tags=50%, list=9%, signal=45%	JAK3/LYN/JAK2/STAT5A/STAT3/GHR/PTPN1
GOBP_COMPLEMENT_ACTIVATION_LECTIN_PATHWAY	GOBP_COMPLEMENT_ACTIVATION_LECTIN_PATHWAY	12	0.812197	1.78366	0.00470594	0.040123	0.0321792	686	tags=42%, list=4%, signal=40%	FCN1/MFAP4/COLEC10/FCN3/COLEC11
GOCC_PROTEIN_COMPLEX_INVOLVED_IN_CELL_ADHESION	GOCC_PROTEIN_COMPLEX_INVOLVED_IN_CELL_ADHESION	36	0.637174	1.7673	0.00471714	0.0401662	0.0322138	1520	tags=36%, list=8%, signal=33%	ITGB2/ITGA4/ITGAL/ITGBL1/ITGB7/ITGAM/JAM2/LYN/ITGAX/CTLA4/ITGA9/CD80/CD28
GOMF_NEUROPEPTIDE_RECEPTOR_BINDING	GOMF_NEUROPEPTIDE_RECEPTOR_BINDING	34	-0.631164	-1.74271	0.00472715	0.0401992	0.0322403	100	tags=12%, list=1%, signal=12%	PMCH/MRAP/NTS/TAC1
GOBP_GLIAL_CELL_MIGRATION	GOBP_GLIAL_CELL_MIGRATION	44	0.597279	1.74271	0.00482558	0.040983	0.0328689	2399	tags=36%, list=13%, signal=32%	CX3CR1/CCL2/CCR2/GPR183/TIAM1/TSPO/IDH2/SUN2/LRP1/CX3CL1/STAP1/ATP1B2/SYNE2/TREM2/CCL3/P2RY12
GOMF_TUMOR_NECROSIS_FACTOR_RECEPTOR_BINDING	GOMF_TUMOR_NECROSIS_FACTOR_RECEPTOR_BINDING	29	0.658752	1.75471	0.00490509	0.0416043	0.0333672	1690	tags=45%, list=9%, signal=41%	TNFSF13B/TNFSF10/TNFSF8/LTB/SIVA1/STAT1/TRAF1/CASP8/TNFSF14/TRAF3/CD40LG/TRADD/TNFSF12
GOBP_REGULATION_OF_TRANSMEMBRANE_RECEPTOR_PROTEIN_SERINE_THREONINE_KINASE_SIGNALING_PATHWAY	GOBP_REGULATION_OF_TRANSMEMBRANE_RECEPTOR_PROTEIN_SERINE_THREONINE_KINASE_SIGNALING_PATHWAY	229	-0.392584	-1.42889	0.00492605	0.041728	0.0334664	1656	tags=13%, list=9%, signal=12%	PELO/HSP90AB1/RBPMS2/THBS1/XIAP/ONECUT2/FOLR1/PARP1/TOB1/SULF1/HIPK2/ACVR2B/SMAD2/MTMR4/BMPR1A/CD109/GREM1/GREM2/BMP2/HOXA13/STRAP/LOX/BAMBI/FERMT1/CDKN2B/PMEPA1/DLX1/PEG10/SFRP2/DKK1
GOBP_NEGATIVE_REGULATION_OF_CANONICAL_WNT_SIGNALING_PATHWAY	GOBP_NEGATIVE_REGULATION_OF_CANONICAL_WNT_SIGNALING_PATHWAY	167	-0.413013	-1.45273	0.00498978	0.0421803	0.0338291	2656	tags=22%, list=14%, signal=19%	PSMB4/FZD4/SCYL2/GSK3B/DKK3/PTPRU/PSME3/PSMC5/PSMD4/CAV1/LIMD1/APC/NOTUM/PSMD6/PSMC2/PSMA1/PSMC6/TMEM64/SOX9/BICC1/PSMD11/SNAI2/KLHL12/PSMD14/GREM1/BMP2/FZD6/NKD1/PSMD12/STK3/CTHRC1/ZNRF3/FERMT1/AXIN2/SFRP2/DKK1
GOBP_RESPONSE_TO_TOPOLOGICALLY_INCORRECT_PROTEIN	GOBP_RESPONSE_TO_TOPOLOGICALLY_INCORRECT_PROTEIN	188	-0.404922	-1.45251	0.00499232	0.0421803	0.0338291	3968	tags=32%, list=21%, signal=26%	HYOU1/YOD1/TMED2/SERPINH1/UBXN4/EXTL3/HSPA5/SYVN1/JKAMP/KLHDC3/ERMP1/HSPA1B/EIF2S1/TBL2/UGGT1/HSP90B1/CDK5RAP3/TM7SF3/HSPB8/DDRGK1/SSR1/RHBDD2/SEC31A/HSPE1/DNAJB4/MBTPS2/UGGT2/PDIA6/ATF6/HSPD1/ATF3/PREB/CCND1/CREB3L2/CTH/STT3B/HSP90AB1/GOSR2/THBS1/HSPA4/UBE2W/DNAJB11/HSPA4L/EDEM3/GFPT1/TMEM33/CANX/COMP/DDX11/EXTL2/FAF2/HSPA9/DNAJB9/WIPI1/PACRG/COPS5/KDELR3/CLGN/THBS4/ASNS/AGR2
GOBP_RECEPTOR_CLUSTERING	GOBP_RECEPTOR_CLUSTERING	51	0.560602	1.68924	0.00501844	0.0423463	0.0339623	2428	tags=27%, list=13%, signal=24%	ITGB2/ITGA4/ITGAL/ITGB7/GSN/FLNA/PIGR/ZDHHC2/PTN/APOE/CD81/SSNA1/THY1/SHANK3
GOCC_CYTOPLASMIC_REGION	GOCC_CYTOPLASMIC_REGION	215	-0.398665	-1.44368	0.00506987	0.0427253	0.0342662	2424	tags=19%, list=13%, signal=16%	PURA/SPAG16/PRKAR2A/DNAH14/KIF3B/FMR1/BBS1/OPA1/EFHC1/PRKAR1A/GPSM2/AP3S1/TULP3/SPAST/KIFAP3/WLS/KIF1B/PHLDB2/BSN/NEK4/KIF5B/AP3B1/UHMK1/DYNC2H1/MYO5B/ARFGEF2/FBXW11/WDR35/DYNC2LI1/RAB27B/WASF1/SYBU/DCDC2/MAP2/UNC13A/GNAI1/KIF3A/ANLN/DNAH11/MNS1
GOBP_TRNA_TRANSPORT	GOBP_TRNA_TRANSPORT	34	-0.627446	-1.73244	0.00508257	0.0427772	0.0343079	1813	tags=50%, list=10%, signal=45%	RAE1/NUP43/NUP153/NUP35/NUP160/SEH1L/NUP37/TPR/NUP133/SSB/POM121/NUP107/RANBP2/NUP205/TOMM20/NUP155/XPOT
GOBP_REGULATION_OF_NON_CANONICAL_WNT_SIGNALING_PATHWAY	GOBP_REGULATION_OF_NON_CANONICAL_WNT_SIGNALING_PATHWAY	25	-0.67853	-1.76173	0.00515366	0.0433198	0.034743	442	tags=16%, list=2%, signal=16%	NKD1/ZNRF3/SFRP2/DKK1
GOMF_CATALYTIC_ACTIVITY_ACTING_ON_RNA	GOMF_CATALYTIC_ACTIVITY_ACTING_ON_RNA	302	-0.368595	-1.38096	0.0051669	0.0433755	0.0347877	4646	tags=37%, list=24%, signal=28%	ISG20L2/TRMT5/POLR3G/POP1/RPP14/MEPCE/RARS2/DDX58/ENDOG/DHX15/DDX50/TGS1/DTWD1/PTRH2/TRMT112/RPAP1/POLR2G/AARS2/DALRD3/TFB1M/RAD54B/FTSJ3/EXD2/THUMPD2/QRSL1/LCMT2/NSUN5/TDP2/NSUN4/METTL2A/METTL14/EDC3/DHX30/TRNT1/DHX36/AARSD1/DIS3/EXOSC9/DHX35/EIF4A2/DHX32/DDX41/DDX46/DDX55/NOP2/POLR3B/EXOSC7/EIF4A3/DDX5/YARS2/RNASEH1/IFIH1/TRIT1/MARS2/DUS1L/DDX21/PSTK/DDX53/LACTB2/POLR3C/METTL2B/POLR2C/POLR2K/PO…
GOMF_CYSTEINE_TYPE_ENDOPEPTIDASE_REGULATOR_ACTIVITY_INVOLVED_IN_APOPTOTIC_PROCESS	GOMF_CYSTEINE_TYPE_ENDOPEPTIDASE_REGULATOR_ACTIVITY_INVOLVED_IN_APOPTOTIC_PROCESS	38	0.607182	1.71331	0.00517574	0.043394	0.0348026	2065	tags=37%, list=11%, signal=33%	CASP1/ATP2A3/TNFAIP8/RPS6KA1/SERPINB9/BIRC3/NLRP1/CD27/NLRP12/TNFSF14/CARD8/PYCARD/RPS6KA3/CTSH
GOBP_DOPAMINERGIC_NEURON_DIFFERENTIATION	GOBP_DOPAMINERGIC_NEURON_DIFFERENTIATION	36	-0.609659	-1.71074	0.00523553	0.0438392	0.0351596	473	tags=8%, list=2%, signal=8%	RSPO2/SFRP2/DKK1
GOMF_CYSTEINE_TYPE_ENDOPEPTIDASE_ACTIVITY	GOMF_CYSTEINE_TYPE_ENDOPEPTIDASE_ACTIVITY	92	0.487733	1.60617	0.00525349	0.0439334	0.0352352	2141	tags=27%, list=11%, signal=24%	CTSK/CTSS/CASP1/CTSW/UCHL1/CTSZ/CAPN3/CAPN12/CASP8/MALT1/CFLAR/LGMN/CAPNS1/CASP4/CASP10/CASP12/USP11/SFRP1/USP41/PYCARD/USP15/USP10/CTSB/CTSH/RCE1
GOCC_CILIARY_PLASM	GOCC_CILIARY_PLASM	94	-0.468091	-1.54314	0.00527516	0.0440583	0.0353353	2306	tags=22%, list=12%, signal=20%	MAK/TRAF3IP1/ATG7/TTC30A/WDR11/SPAG16/PRKAR2A/DNAH14/BBS1/EFHC1/PRKAR1A/TULP3/KIFAP3/NEK4/DYNC2H1/ARFGEF2/WDR35/DYNC2LI1/DCDC2/DNAH11/MNS1
GOBP_POSITIVE_REGULATION_OF_NON_CANONICAL_WNT_SIGNALING_PATHWAY	GOBP_POSITIVE_REGULATION_OF_NON_CANONICAL_WNT_SIGNALING_PATHWAY	15	-0.756753	-1.73321	0.00529589	0.0441752	0.035429	442	tags=13%, list=2%, signal=13%	NKD1/DKK1
GOBP_TOLL_LIKE_RECEPTOR_9_SIGNALING_PATHWAY	GOBP_TOLL_LIKE_RECEPTOR_9_SIGNALING_PATHWAY	25	0.683676	1.76217	0.00535125	0.0445801	0.0357538	1593	tags=28%, list=8%, signal=26%	PTPN22/FCRL3/TLR8/MYD88/HAVCR2/IRAK4/TLR7
GOMF_SUPEROXIDE_GENERATING_NAD_P_H_OXIDASE_ACTIVITY	GOMF_SUPEROXIDE_GENERATING_NAD_P_H_OXIDASE_ACTIVITY	10	0.826923	1.73424	0.00540412	0.0449147	0.0360221	2586	tags=60%, list=14%, signal=52%	CYBB/CYBA/NCF2/NCF4/DUOX2/DUOX1
GOCC_APICAL_PART_OF_CELL	GOCC_APICAL_PART_OF_CELL	380	-0.346212	-1.32538	0.0054139	0.0449147	0.0360221	3209	tags=25%, list=17%, signal=21%	PARD6G/CA2/SRR/CEACAM7/CEACAM20/SLC23A2/PRKCI/KCNE4/PODXL/EMP2/SLC38A3/HAX1/ATP2B1/DDR2/SLC23A1/SLC22A18/ENPEP/SLC2A5/ATP6V1A/PARD3/MYO1B/JAG1/CEACAM1/OXTR/SLC15A1/STX3/SORBS2/HFE/PRKAA1/KCNK1/GJB6/TJP1/DLG1/ATP1A1/ABCC4/TMEM30A/SLC5A6/ABCC2/ACE2/SLC7A1/SLC25A27/CNKSR3/HSP90AB1/RAB18/SLC46A1/ENPP3/ABCB1/FOLR1/SLC3A2/SCNN1A/SLC26A2/ERBB3/CD36/OCLN/SLC9A3/DYNC2H1/MYO5B/PFKM/ANO1/SLC12A1/DYNC2LI1/MA…
GOBP_POSITIVE_REGULATION_OF_INTERLEUKIN_10_PRODUCTION	GOBP_POSITIVE_REGULATION_OF_INTERLEUKIN_10_PRODUCTION	36	0.631815	1.75244	0.00541884	0.0449147	0.0360221	1925	tags=44%, list=10%, signal=40%	IL23A/SASH3/CLEC7A/SYK/HGF/IRF4/CD83/TLR2/TLR4/LGALS9/CD40LG/CD28/STAT3/NOD2/PYCARD/LILRA5
GOBP_REGULATION_OF_LEUKOCYTE_TETHERING_OR_ROLLING	GOBP_REGULATION_OF_LEUKOCYTE_TETHERING_OR_ROLLING	13	0.788313	1.74374	0.00541884	0.0449147	0.0360221	2722	tags=54%, list=14%, signal=46%	ITGA4/CXCL12/PTAFR/SELP/CCL21/CCL25/CCL28
GOBP_T_CELL_TOLERANCE_INDUCTION	GOBP_T_CELL_TOLERANCE_INDUCTION	14	0.780854	1.75644	0.00545091	0.0451233	0.0361895	3309	tags=71%, list=17%, signal=59%	IDO1/CD3E/LILRB2/HLA-B/IL2RA/ICOS/CBLB/LILRB4/PHLPP1/TGFBR2
GOBP_NEGATIVE_REGULATION_OF_CYTOKINE_PRODUCTION_INVOLVED_IN_IMMUNE_RESPONSE	GOBP_NEGATIVE_REGULATION_OF_CYTOKINE_PRODUCTION_INVOLVED_IN_IMMUNE_RESPONSE	26	0.678602	1.77473	0.00545983	0.0451402	0.036203	3067	tags=58%, list=16%, signal=48%	CD96/JAK3/IRAK3/APOA1/HLA-F/HMOX1/BST2/LILRB1/TGFB3/TBX21/ARG1/LILRB4/TNF/TGFB1/CUEDC2
GOBP_HETEROTYPIC_CELL_CELL_ADHESION	GOBP_HETEROTYPIC_CELL_CELL_ADHESION	59	0.557701	1.70161	0.00547649	0.0452208	0.0362676	1567	tags=32%, list=8%, signal=30%	PTPRC/ITGB2/ITGA4/SKAP1/VCAM1/CD2/LILRB2/CD44/ITGB7/LCK/APOA1/KLF4/IL1B/ITGAX/FGA/IL1RN/FGG/FGB/CD200
GOCC_MITOCHONDRIAL_PROTEIN_CONTAINING_COMPLEX	GOCC_MITOCHONDRIAL_PROTEIN_CONTAINING_COMPLEX	207	-0.398609	-1.43537	0.00549344	0.0453035	0.036334	3619	tags=39%, list=19%, signal=32%	MRPS5/MRPL11/MRPL14/MRPS24/MRPS18C/IMMP2L/MRPL35/MRPL16/BCKDHB/NDUFB2/MRPS7/SDHC/MRPL18/TOMM5/NDUFC2/NDUFA4/MRPS22/NSUN4/CLPX/PDHB/MRPL32/NDUFS3/NDUFA2/DNA2/MRPL27/NDUFB3/MRPL21/UQCRHL/MRPS33/PHB/MRPL39/NDUFA9/MRPL51/MRPL42/MFN1/MRPS16/TIMM8B/MRPL2/NDUFB5/NDUFA12/NDUFS6/AGK/UQCRC1/NDUFB9/NDUFAF1/MRPS36/NDUFB6/NDUFS1/MRPL45/MRPS21/MRPL3/MRPS27/MRPS30/MRPS35/MCCC2/MRPL15/IMMP1L/DAP3/SDHD/MRPL24/NDU…
GOBP_ANTIBACTERIAL_HUMORAL_RESPONSE	GOBP_ANTIBACTERIAL_HUMORAL_RESPONSE	45	0.590811	1.72962	0.00550841	0.0453699	0.0363872	1753	tags=24%, list=9%, signal=22%	IGHA1/IGHM/PGC/RNASE6/DEFB1/HLA-E/ANG/FGA/HLA-A/FGB/NOD2
GOBP_CELL_CYCLE_CHECKPOINT	GOBP_CELL_CYCLE_CHECKPOINT	185	-0.407391	-1.45968	0.00553764	0.0455534	0.0365344	4349	tags=37%, list=23%, signal=29%	THOC1/MAD2L1/MUC1/PCID2/CARM1/CASP2/CHEK1/TFDP2/TIPRL/SYF2/TP53BP1/DYNC1LI1/RPA4/TIMELESS/CHMP4C/CNOT10/KNTC1/RPS27L/ZW10/ZNF207/MDM4/PLAGL1/RAD1/DNA2/TRIP13/CDK5RAP3/ATR/CUL4A/PTPN11/ERCC6/FBXO31/WAC/BUB1/PCBP4/NAE1/CEP63/CDC14B/PLK2/INTS7/IK/TAOK1/APC/AURKA/HUS1/CCND1/HORMAD1/CDK1/RAD17/TPR/ETAA1/WEE1/CNOT6/ZWINT/GADD45A/ARID3A/TOPBP1/NSUN2/DONSON/CCNB1/CDC5L/MAD2L1BP/PCNA/CDC6/RINT1/PRKDC/MSH2…
GOBP_MUSCLE_CELL_PROLIFERATION	GOBP_MUSCLE_CELL_PROLIFERATION	172	0.407738	1.44094	0.00557004	0.0457624	0.036702	2856	tags=30%, list=15%, signal=25%	CCL5/MMP9/AIF1/PTAFR/TERT/HPGD/MYD88/STAT1/FGFR2/KLF4/AKR1B1/AKT1/TNFAIP3/GNAI2/GSTP1/MEF2C/IGFBP3/ANG/ELN/SERPINF2/HMOX1/SOD2/NDRG2/CFLAR/TGFBR3/JAK2/IRAK4/CX3CL1/IFNG/PDE1A/BMP4/EREG/MMP2/DNMT1/IGFBP5/S1PR1/BMP10/TGFB3/TGM2/ZFPM2/IL15/PDCD4/OGN/JUN/MAP3K5/TBX20/HDAC4/RBP4/TNF/ERN1/CALCRL
GOCC_PLASMA_MEMBRANE_RAFT	GOCC_PLASMA_MEMBRANE_RAFT	102	0.470158	1.57947	0.00558115	0.0457962	0.0367292	2632	tags=30%, list=14%, signal=26%	CD8A/MS4A1/ITGB2/SKAP1/LCP2/HCK/ITGAM/FXYD1/SELPLG/PTGIS/HMOX1/BMPR2/JAK2/EZR/ATP2B4/LRRK2/CBL/DLC1/MS4A4A/ADRA1A/SRC/F2R/ATP1A2/PLVAP/CR1/TREM2/P2RY12/KCNMA1/RANGRF/MYOF/MAPK3
GOBP_REGIONALIZATION	GOBP_REGIONALIZATION	314	-0.36224	-1.36461	0.00563128	0.0461497	0.0370127	1120	tags=9%, list=6%, signal=8%	AIDA/DYNC2H1/HIPK2/EPB41L5/PCSK5/ACVR2B/SEMA3A/DLX2/SMAD2/CELSR2/BMPR1A/TBX3/GREM1/BMP2/NKD1/PRKDC/MEOX2/ROBO2/AXIN2/DLX1/RELN/ROBO1/HEY1/SFRP2/SEMA3C/MNS1/DKK1
GOCC_COATED_VESICLE_MEMBRANE	GOCC_COATED_VESICLE_MEMBRANE	172	0.406808	1.43765	0.00564381	0.0461946	0.0370487	2004	tags=19%, list=11%, signal=17%	HLA-DRB4/IL7R/CD3D/CD3G/HLA-DRB5/CD74/CD4/HLA-DPA1/HLA-DRB1/HLA-DPB1/HLA-DQA1/HLA-DRA/HLA-F/HLA-E/HLA-B/HLA-DQB1/CFTR/HLA-C/AP2M1/CNIH3/NECAP2/HLA-A/VAMP2/EPN1/EREG/APOE/SYT11/CD207/HLA-H/SEC31B/M6PR/B2M
GOBP_TRANSCRIPTION_BY_RNA_POLYMERASE_I	GOBP_TRANSCRIPTION_BY_RNA_POLYMERASE_I	58	-0.533489	-1.64237	0.0057166	0.046732	0.0374796	2855	tags=36%, list=15%, signal=31%	WDR43/SMARCA4/ERCC6/POLR2K/POLR1B/MTOR/MNAT1/CCNH/HEATR1/TAF1A/PWP1/WDR75/POLR1A/IPPK/POLR1C/DDX11/UTP15/ZMPSTE24/TAF1D/NOL11/CDK7
GOBP_REGULATION_OF_EXTRINSIC_APOPTOTIC_SIGNALING_PATHWAY_VIA_DEATH_DOMAIN_RECEPTORS	GOBP_REGULATION_OF_EXTRINSIC_APOPTOTIC_SIGNALING_PATHWAY_VIA_DEATH_DOMAIN_RECEPTORS	57	0.526373	1.61368	0.0057416	0.0468778	0.0375966	2677	tags=46%, list=14%, signal=39%	FAS/TNFSF10/HGF/TMC8/BMP5/ICAM1/TNFAIP3/STK4/HMOX1/FGA/CASP8/LGALS3/CFLAR/FGG/FGB/TIMP3/PMAIP1/STX4/TRADD/SFRP1/GPX1/SP100/FAF1/RAF1/ARHGEF2/BRCA1
GOMF_DNA_DEPENDENT_ATPASE_ACTIVITY	GOMF_DNA_DEPENDENT_ATPASE_ACTIVITY	48	-0.572699	-1.69454	0.00581156	0.0473899	0.0380073	4100	tags=52%, list=22%, signal=41%	SMARCA5/RFC3/RAD54B/RBBP4/XRCC6/MSH5/RAD51C/DHX36/BTAF1/CHD6/SMARCA4/ERCC6/RFC2/ATRX/SMARCAD1/MSH6/RAD17/SMARCA1/MSH3/HLTF/DSCC1/DDX11/TOP2A/CDK7/MSH2
GOBP_TERMINATION_OF_RNA_POLYMERASE_I_TRANSCRIPTION	GOBP_TERMINATION_OF_RNA_POLYMERASE_I_TRANSCRIPTION	26	-0.673079	-1.75614	0.00583823	0.0475482	0.0381343	2169	tags=38%, list=11%, signal=34%	POLR2K/POLR1B/MNAT1/CCNH/TAF1A/POLR1A/POLR1C/ZMPSTE24/TAF1D/CDK7
GOBP_PROSTANOID_METABOLIC_PROCESS	GOBP_PROSTANOID_METABOLIC_PROCESS	43	0.578628	1.67755	0.00585801	0.04765	0.0382159	2147	tags=30%, list=11%, signal=27%	CD74/AVPR1A/ANXA1/PTGDS/HPGD/PTGIS/IL1B/GSTP1/AKR1C4/PTGS1/TBXAS1/FABP5/PTGR1
GOBP_HEART_MORPHOGENESIS	GOBP_HEART_MORPHOGENESIS	229	-0.387872	-1.41174	0.00593282	0.0481986	0.0386559	2234	tags=15%, list=12%, signal=13%	PARVA/TPM1/MICAL2/MED1/MTOR/CPE/PPP1R13L/MIB1/FOXH1/MKKS/SOX9/FOLR1/PTK2/PTCD2/SOS1/SNAI2/TEAD2/BMPR1A/ZMPSTE24/TBX3/BMP2/DSP/HAS2/YAP1/COL11A1/ROBO2/ANKRD1/SOX4/AXIN2/ROBO1/HEY1/SFRP2/SEMA3C/DKK1
GOBP_NEUROEPITHELIAL_CELL_DIFFERENTIATION	GOBP_NEUROEPITHELIAL_CELL_DIFFERENTIATION	20	-0.733629	-1.80584	0.00605173	0.0491038	0.0393819	670	tags=30%, list=4%, signal=29%	SERPINE1/BCCIP/DSPP/BMP2/INSM1/SOX4
GOCC_CHAPERONE_COMPLEX	GOCC_CHAPERONE_COMPLEX	26	-0.672094	-1.75357	0.00612477	0.0496349	0.0398078	4155	tags=62%, list=22%, signal=48%	TCP1/STIP1/CCT6B/CCT8/HSPB8/PTGES3/CCT2/CCT4/HSP90AB1/SDF2/DNAJB11/CCT5/CCT3/PSMG1/CCT6A/BAG2
GOBP_POSITIVE_REGULATION_OF_PROTEIN_KINASE_ACTIVITY	GOBP_POSITIVE_REGULATION_OF_PROTEIN_KINASE_ACTIVITY	493	0.331996	1.29685	0.00613347	0.0496439	0.0398151	2290	tags=21%, list=12%, signal=19%	PTPRC/CCL5/IL23A/FYN/S100A12/CCR7/SAA1/LCP2/RASSF2/CD74/CD4/CCND2/CXCR4/SYK/PIK3R5/CSF1R/CD86/HGF/MLKL/RASGRP1/TIAM1/CD300A/GPRC5B/IQGAP1/ADCY7/PTK2B/CDC25B/FPR1/C5AR1/AKT1/CCND3/STK4/NCKAP1L/IL1B/NTRK2/MAP3K3/ANG/RAPGEF1/DUSP7/HTR2B/MAP4K1/MALT1/GADD45B/TLR4/PRKCD/ADRA2A/CKS1B/FLT3/JAK2/RIPK2/ATP2B4/CIB1/ADCY3/LRRK2/GADD45G/CD40/PRKACB/IFNG/LPAR1/STAP1/AVPI1/MAP2K6/CD40LG/ARAF/BMP4/FGD2/MDFIC/PR…
GOBP_CELLULAR_RESPONSE_TO_INTERFERON_BETA	GOBP_CELLULAR_RESPONSE_TO_INTERFERON_BETA	19	0.726854	1.75793	0.00618534	0.050002	0.0401022	577	tags=32%, list=3%, signal=31%	MNDA/PYHIN1/AIM2/IRF1/STAT1/IFI16
GOBP_ENDOTHELIAL_CELL_APOPTOTIC_PROCESS	GOBP_ENDOTHELIAL_CELL_APOPTOTIC_PROCESS	50	0.565581	1.69458	0.0062116	0.0501523	0.0402228	3709	tags=46%, list=20%, signal=37%	ITGA4/CCL2/TERT/ICAM1/TNFAIP3/TEK/FGA/BMPR2/GATA3/CD40/FGG/CD40LG/FGB/KDR/COL4A3/PDCD4/MAP3K5/TNF/GAS6/CDH5/FGF21/FASLG/PAK4
GOMF_S_ADENOSYLMETHIONINE_DEPENDENT_METHYLTRANSFERASE_ACTIVITY	GOMF_S_ADENOSYLMETHIONINE_DEPENDENT_METHYLTRANSFERASE_ACTIVITY	111	-0.452285	-1.51877	0.00623328	0.0502654	0.0403135	4771	tags=43%, list=25%, signal=33%	THUMPD3/SETD5/LCMT1/TRMT5/MEPCE/PCMT1/TRMT112/RBBP5/CARM1/SUV39H2/TFB1M/FTSJ3/THUMPD2/ICMT/SETDB1/NSUN5/NSUN4/RRP8/METTL2A/METTL14/TPMT/NOP2/PCMTD1/FBXO11/N6AMT1/METTL2B/AS3MT/EMG1/EHMT2/SETD7/METTL1/SUZ12/COQ3/METTL6/TRMT11/PCMTD2/TRMT6/PRMT5/NSUN2/SMYD1/TRMT61B/METTL5/TFB2M/PRMT3/SMYD2/SMYD3/TARBP1/GNMT
GOBP_PEPTIDYL_PROLINE_MODIFICATION	GOBP_PEPTIDYL_PROLINE_MODIFICATION	47	-0.56095	-1.66292	0.00634989	0.0511428	0.0410172	3038	tags=40%, list=16%, signal=34%	FKBP3/PPWD1/OGFOD1/PPIL4/FKBP7/PPIH/FKBP4/EGLN1/FKBP9/PPIL1/FKBP1B/PPID/PIN4/FKBP5/CWC27/PPIC/RANBP2/P4HA2/FKBP10
GOBP_COMPLEMENT_ACTIVATION_ALTERNATIVE_PATHWAY	GOBP_COMPLEMENT_ACTIVATION_ALTERNATIVE_PATHWAY	16	0.764137	1.78013	0.00636304	0.0511857	0.0410516	2565	tags=62%, list=13%, signal=54%	C7/CFP/C9/C8B/C8A/CR2/CFB/CR1/VSIG4/C3
GOBP_NEGATIVE_REGULATION_OF_PROTEIN_LOCALIZATION_TO_NUCLEUS	GOBP_NEGATIVE_REGULATION_OF_PROTEIN_LOCALIZATION_TO_NUCLEUS	28	-0.635353	-1.67178	0.00637908	0.0512499	0.0411031	2396	tags=36%, list=13%, signal=31%	GSK3B/OTUD7B/RAB23/POLR1A/CD36/CTNNA1/CLDN18/ANGPT1/FERMT1/TMEM98
GOBP_POSITIVE_REGULATION_OF_CATION_TRANSMEMBRANE_TRANSPORT	GOBP_POSITIVE_REGULATION_OF_CATION_TRANSMEMBRANE_TRANSPORT	127	0.442361	1.50616	0.00638668	0.0512499	0.0411031	3036	tags=29%, list=16%, signal=25%	CXCL9/CXCL10/CTSS/FGF14/CCL2/CCR2/ACTN2/FXYD1/FLNA/CXCL11/CAPN3/RAMP3/APLNR/STIM2/CX3CL1/IFNG/ATP1B2/ANK2/F2R/TMSB4X/DRD1/ANK3/CALM1/BDKRB1/CACNB2/CALM3/TREM2/THY1/SHANK3/RGN/FXYD2/ARF1/KCNE2/RYR2/STAC3/EHD3/DNM2
GOBP_REGULATION_OF_ACTIN_FILAMENT_ORGANIZATION	GOBP_REGULATION_OF_ACTIN_FILAMENT_ORGANIZATION	241	0.369881	1.3589	0.00640256	0.0513145	0.0411549	2845	tags=29%, list=15%, signal=25%	CORO1A/GPR65/PLEK/CCR7/GMFG/PTGER4/HCK/CXCL12/CAPG/HCLS1/CDC42EP3/ACTN2/COTL1/TMSB10/GSN/APOA1/EVL/PTK2B/ICAM1/FLNA/NCKAP1L/PREX1/FCHSD2/ELN/ARPC2/VASP/SERPINF2/SSH2/WDR1/PFN1/ARAP1/PRKCD/WASF2/CTNNA2/CORO1B/SYNPO2/SH3BP1/CX3CL1/LPAR1/SORBS3/SYNPO/CAPZB/DLC1/S100A10/SFRP1/C9orf72/PXN/PYCARD/TWF2/ARPC4/TMSB4X/CCL21/S1PR1/TGFB3/DBNL/FERMT2/ACTR2/ACTR3/SHANK3/SLIT2/LIMK1/MYADM/WAS/ADD3/PPM1F/SPTBN2/…
GOBP_CALCIUM_MEDIATED_SIGNALING_USING_INTRACELLULAR_CALCIUM_SOURCE	GOBP_CALCIUM_MEDIATED_SIGNALING_USING_INTRACELLULAR_CALCIUM_SOURCE	19	0.724936	1.75329	0.00641584	0.0513581	0.0411899	2876	tags=53%, list=15%, signal=45%	PTPRC/VCAM1/PTGFR/DEFB1/SELP/CCL20/PRNP/KDR/PTPRJ/RYR2
GOBP_ENDODERMAL_CELL_FATE_COMMITMENT	GOBP_ENDODERMAL_CELL_FATE_COMMITMENT	13	-0.799481	-1.8032	0.0064302	0.0514102	0.0412316	1125	tags=23%, list=6%, signal=22%	CDC73/CTR9/DKK1
GOBP_NEGATIVE_REGULATION_OF_GLIAL_CELL_DIFFERENTIATION	GOBP_NEGATIVE_REGULATION_OF_GLIAL_CELL_DIFFERENTIATION	19	-0.722356	-1.76653	0.00644554	0.05147	0.0412796	860	tags=26%, list=5%, signal=25%	NF1/DLX2/DLX1/TMEM98/LIN28A
GOBP_MYD88_DEPENDENT_TOLL_LIKE_RECEPTOR_SIGNALING_PATHWAY	GOBP_MYD88_DEPENDENT_TOLL_LIKE_RECEPTOR_SIGNALING_PATHWAY	35	0.607758	1.67329	0.00647331	0.0516284	0.0414067	3122	tags=51%, list=16%, signal=43%	IRAK3/TLR8/CD300A/IRF1/MYD88/BTK/CD14/TLR2/TLR4/IRAK4/TLR1/LY96/TAB2/UBC/IRF7/UBA52/CD300LF/UBB
GOMF_ANTIOXIDANT_ACTIVITY	GOMF_ANTIOXIDANT_ACTIVITY	77	0.483147	1.54927	0.00648115	0.0516284	0.0414067	3482	tags=35%, list=18%, signal=29%	NQO1/FABP1/IPCEF1/HBB/ALOX5AP/GSTP1/CLIC2/SOD2/GSTT1/HP/GSTZ1/GPX2/PTGS1/APOE/ALB/GPX1/APOM/S100A9/DUOX2/DUOX1/APOA4/HBM/PTGES/GPX4/GPX7/HBE1/CYGB
GOBP_NEGATIVE_REGULATION_OF_TOLL_LIKE_RECEPTOR_SIGNALING_PATHWAY	GOBP_NEGATIVE_REGULATION_OF_TOLL_LIKE_RECEPTOR_SIGNALING_PATHWAY	33	0.615213	1.6748	0.00651039	0.0517424	0.0414981	2449	tags=39%, list=13%, signal=34%	IRAK3/LYN/IRF4/CD300A/TNFAIP3/LILRA2/CD14/TLR4/ARRB2/NOD2/MFHAS1/LY96/PTPRS
GOBP_NEGATIVE_REGULATION_OF_INTERLEUKIN_10_PRODUCTION	GOBP_NEGATIVE_REGULATION_OF_INTERLEUKIN_10_PRODUCTION	18	0.74348	1.78067	0.00651126	0.0517424	0.0414981	1708	tags=39%, list=9%, signal=35%	IL23A/IDO1/FCGR2B/JAK3/TYROBP/PDCD1LG2/LILRB1
GOBP_TRANSLATIONAL_TERMINATION	GOBP_TRANSLATIONAL_TERMINATION	101	-0.462356	-1.53298	0.00657668	0.0521877	0.0418552	5330	tags=52%, list=28%, signal=38%	MRPL36/ABCE1/MRPL47/MRPL48/MRPS28/MRPS18B/MRPL22/MRPS17/MRPS5/MRPL11/MRPL14/MRPS24/MRPS18C/MRPL35/TRMT112/ERAL1/MRPL16/GSPT2/MRPS7/MRPL18/MRPS22/OGFOD1/MRPL32/MRPL27/MRPL1/MRPL21/MRPS33/ETF1/MRPL39/MRPS25/MRPL51/MRPL42/N6AMT1/MRPS16/MRPL2/MRPS36/MRPL45/MRPS21/MRPL3/MRPS27/MRPS30/MRPS35/MRPS23/MRPL15/DAP3/MRPL24/MRPL10/MRPL30/GFM2/MRPL19/EIF5A2/MRPL13/MRPS10
GOBP_POST_TRANSLATIONAL_PROTEIN_MODIFICATION	GOBP_POST_TRANSLATIONAL_PROTEIN_MODIFICATION	342	-0.35169	-1.33326	0.00658324	0.0521877	0.0418552	3942	tags=31%, list=21%, signal=25%	PSME4/CHML/TULP4/PSMC4/SUMF1/WIPI2/ICMT/PSMD10/PSMB3/PCSK9/ESCO1/WSB1/RAB13/RAB5A/ENAM/KTN1/ZBTB16/PSMB5/SOCS5/PSMC3/MFGE8/F5/SOCS6/FBXO30/ATG7/HSP90B1/GPLD1/CHM/CUL2/RAB2A/CUL4A/HRC/DCAF16/FBXO31/CKAP4/SUMF2/KLHL9/GOLM1/PSMB4/FUCA2/FBXO11/LTBP1/DDB1/PRSS23/DCUN1D3/FN3K/NAE1/PDIA6/FBXL16/COPS8/FBXL18/RAB1A/CUL5/PSME3/PSMC5/PSMD4/FBXL20/COPS6/NOTUM/FEM1C/PSMD6/KLHL20/PSMC2/PSMA1/KCTD6/KBTBD6/FN3KR…
GOBP_NEGATIVE_REGULATION_OF_PROTEOLYSIS	GOBP_NEGATIVE_REGULATION_OF_PROTEOLYSIS	300	0.369162	1.37441	0.00660777	0.0522372	0.0418949	2779	tags=29%, list=15%, signal=25%	LXN/MMP9/RARRES1/SPOCK2/CARD16/CD44/SERPINA12/PZP/FABP1/TNFAIP8/HGF/SERPINA7/SPP2/SERPINA11/TIMP1/RPS6KA1/LAMP3/SERPINB9/IFI16/KLF4/GAS1/AKT1/CTSZ/SERPINA6/SERPINB8/SERPINF2/PAPLN/DNAJC1/AQP1/CST3/CD27/NGFR/VTN/TNFSF14/SERPINA3/CARD8/PLAT/BST2/ARRB2/TIMP2/SPINT2/IGBP1/PLAUR/MICAL1/LRRK2/ITIH4/LRP1/CDKN2D/SERPINA10/TP53/CSTA/ITIH1/SMR3A/SERPINB1/SERPINA1/CST7/TTC36/TIMP3/MTM1/PRNP/GPX1/SIAH2/FHIT/…
GOBP_INFLAMMATORY_RESPONSE_TO_WOUNDING	GOBP_INFLAMMATORY_RESPONSE_TO_WOUNDING	14	0.773383	1.73964	0.00661066	0.0522372	0.0418949	2969	tags=64%, list=16%, signal=54%	CCR2/TIMP1/ALOX5/HMOX1/GRN/MDK/F2R/TGFB1/AGER
GOBP_RESPONSE_TO_INTERLEUKIN_9	GOBP_RESPONSE_TO_INTERLEUKIN_9	10	0.821239	1.72232	0.00661342	0.0522372	0.0418949	1641	tags=50%, list=9%, signal=46%	IL2RG/JAK3/STAT1/STAT5A/STAT3
GOBP_POSITIVE_REGULATION_OF_VASOCONSTRICTION	GOBP_POSITIVE_REGULATION_OF_VASOCONSTRICTION	31	0.627697	1.69905	0.0066954	0.0528211	0.0423632	1907	tags=35%, list=10%, signal=32%	CD38/AVPR1A/PTAFR/ICAM1/AKT1/FGA/FGG/SMTNL1/FGB/ADRA1A/F2R
GOBP_POSITIVE_REGULATION_OF_LEUKOCYTE_DEGRANULATION	GOBP_POSITIVE_REGULATION_OF_LEUKOCYTE_DEGRANULATION	23	0.688824	1.74939	0.00681236	0.0536317	0.0430133	1682	tags=35%, list=9%, signal=32%	ITGB2/FGR/SYK/ITGAM/PTAFR/HLA-F/IL4R/STX4
GOBP_REGULATORY_T_CELL_DIFFERENTIATION	GOBP_REGULATORY_T_CELL_DIFFERENTIATION	33	0.613235	1.66942	0.00682226	0.0536317	0.0430133	1821	tags=42%, list=10%, signal=38%	LILRB2/HLA-DRB1/HLA-DRA/PLA2G2D/IRF1/NFATC2/CTLA4/LGALS9/DUSP10/FANCA/IFNG/CD28/IL2RA/MDK
GOMF_INTEGRIN_BINDING	GOMF_INTEGRIN_BINDING	132	0.438283	1.50423	0.00683208	0.0536317	0.0430133	2400	tags=31%, list=13%, signal=27%	ITGB2/LCP1/ITGA4/FBLN5/VCAM1/FERMT3/ITGBL1/CXCL12/ITGB7/SYK/ITGAM/CD226/JAM2/LYN/ACTN2/LAMA3/ICAM1/ISG15/GPNMB/IL1B/ITGAX/PTN/VTN/ICAM3/CALR/TIMP2/CX3CL1/CD40LG/TLN1/PTPN2/CD81/S1PR2/SRC/KDR/ICAM2/COL4A3/FERMT2/TLN2/THY1/ADAM15/CDH17
GOBP_DNA_INTEGRITY_CHECKPOINT	GOBP_DNA_INTEGRITY_CHECKPOINT	138	-0.42198	-1.46263	0.00683558	0.0536317	0.0430133	4075	tags=36%, list=21%, signal=28%	CARM1/CASP2/CHEK1/TFDP2/TIPRL/SYF2/TP53BP1/RPA4/TIMELESS/CNOT10/RPS27L/MDM4/PLAGL1/RAD1/DNA2/CDK5RAP3/ATR/CUL4A/PTPN11/ERCC6/FBXO31/WAC/PCBP4/NAE1/CEP63/CDC14B/PLK2/INTS7/TAOK1/AURKA/HUS1/CCND1/CDK1/RAD17/ETAA1/CNOT6/GADD45A/ARID3A/TOPBP1/DONSON/CCNB1/CDC5L/PCNA/CDC6/RINT1/PRKDC/MSH2/SOX4/HMGA2
GOCC_EXTRINSIC_COMPONENT_OF_MEMBRANE	GOCC_EXTRINSIC_COMPONENT_OF_MEMBRANE	276	0.370825	1.37118	0.00683911	0.0536317	0.0430133	2579	tags=22%, list=14%, signal=19%	FCN1/FYN/BST1/GNG2/FGR/HCK/ANXA1/LCK/SYK/PIK3R5/PIK3CD/LYN/SLA/TIAM1/DEFB1/IQGAP1/PTK2B/AKT1/RGS1/GNAI2/KCNAB2/GNB4/NAAA/MGLL/ZAP70/TNK2/CTNNA2/EZR/PLAUR/SLA2/FARP1/PLG/ZC3H12A/GNG5/GNAO1/PIK3CG/GNAS/S100A10/SOCS3/PRNP/VPS13C/PLEKHA4/CYLD/SRC/GNG11/CISH/RS1/ATG2B/GNA15/SYTL3/FERMT2/SYTL1/VAC14/UBXN6/GNB1/CDH17/GNA11/SHANK3/MTMR3/TOR1A/GNG7
GOBP_RECEPTOR_MEDIATED_ENDOCYTOSIS	GOBP_RECEPTOR_MEDIATED_ENDOCYTOSIS	255	0.375068	1.38419	0.00687455	0.0538452	0.0431845	2120	tags=24%, list=11%, signal=22%	IGHA1/IGLV1-44/ITGB2/ITGA4/SAA1/FCGR2B/FCER1G/SYK/MARCO/ITGAM/HBB/APOA1/PPT1/COLEC11/CD14/FCHSD2/RAB31/RAMP3/VTN/HTR2B/AP2M1/SIGLEC1/CALR/APOA5/HP/ARRB2/TNK2/STAB1/MX1/EZR/LRP1/MX2/CBL/CLEC9A/HPR/APOC1/APOE/CD81/CD163/UNC119/ALB/HPX/CAP1/SYT11/LILRB1/APOL1/CD207/SFRP4/APOC2/TFR2/APOC3/IGKC/CCL19/AMBP/DNM1/M6PR/ARRB1/CCL21/B2M/CLU/STAB2/DBNL
GOBP_POSITIVE_REGULATION_OF_T_CELL_RECEPTOR_SIGNALING_PATHWAY	GOBP_POSITIVE_REGULATION_OF_T_CELL_RECEPTOR_SIGNALING_PATHWAY	11	0.814356	1.74958	0.00689115	0.0539107	0.0432371	3430	tags=91%, list=18%, signal=75%	TRAT1/CCR7/LCK/CD226/RELA/CD81/ADA/RPS3/KCNN4/CARD11
GOBP_NEGATIVE_REGULATION_OF_NIK_NF_KAPPAB_SIGNALING	GOBP_NEGATIVE_REGULATION_OF_NIK_NF_KAPPAB_SIGNALING	24	0.675039	1.73685	0.0069629	0.054407	0.0436351	1948	tags=42%, list=10%, signal=37%	C1QTNF3/RASSF2/NLRC3/NLRP12/LITAF/RELA/ZC3H12A/HDAC7/CYLD/TMSB4X
GOBP_VOCALIZATION_BEHAVIOR	GOBP_VOCALIZATION_BEHAVIOR	18	-0.754036	-1.80479	0.00700762	0.0546912	0.043863	466	tags=33%, list=2%, signal=33%	EXT1/MYH14/SHANK2/SRPX2/NRXN3/CNTNAP2
GOBP_TRIGLYCERIDE_CATABOLIC_PROCESS	GOBP_TRIGLYCERIDE_CATABOLIC_PROCESS	38	0.595688	1.68088	0.00701597	0.0546912	0.043863	2002	tags=34%, list=11%, signal=31%	FABP1/FABP4/APOA1/FABP3/CPS1/LIPC/MGLL/APOA5/PIK3CG/PLIN5/APOC2/APOC3/FABP5
GOBP_RESPONSE_TO_DRUG	GOBP_RESPONSE_TO_DRUG	341	0.351019	1.32076	0.00708257	0.0551447	0.0442267	2147	tags=23%, list=11%, signal=21%	FYN/CD38/CYBB/SLAMF8/ANXA1/FBP1/CXCR4/LCK/FOSB/NQO1/PDE4B/LYN/CYP2C8/NNMT/CYP2B6/AIM2/TSPO/APOA1/FABP3/BCL2/PTK2B/CRHBP/ICAM1/TXNIP/ASS1/PPP1R9B/FOS/GABRG3/NCKAP1L/ARL6IP5/NFATC2/IL1B/CYP1A2/MEF2C/SLC8A1/TDO2/ENO3/CPS1/HMOX1/PTN/HTR2B/SOD2/CALR/VAV3/TIMP2/RELA/ABCG5/CYP3A4/NCOA1/IGFBP2/GATA3/SMTNL1/TP53/VEGFB/ACACB/PEMT/MAP2K6/ENG/LGALS1/PRKAR2B/CYP2E1/ABCC1/GNAO1/GNAS/S100A10/SFRP1/CA9/ADRA1A/VE…
GOBP_TISSUE_REMODELING	GOBP_TISSUE_REMODELING	159	0.40629	1.42755	0.00710211	0.0552312	0.0442961	2658	tags=31%, list=14%, signal=27%	RAC2/IL23A/CD38/RASSF2/CCR2/SYK/CSF1R/HAMP/SPP2/INPP5D/TIMP1/PTK2B/FLNA/TNFAIP3/GPNMB/MEF2C/PTN/CST3/BMPR2/NOTCH2/IL7/PTH1R/TP53/P2RX7/HAND2/PLG/EPAS1/ATP6AP1/SFRP1/MMP2/MDK/SRC/F2R/HRG/IGFBP5/S1PR1/TGFB3/TGM2/TMEM119/AXL/LRRK1/IL15/RAB3D/ACVRL1/TCIRG1/BGN/DEF8/ARG1/NOL3/CSK
GOBP_MICROTUBULE_BASED_TRANSPORT	GOBP_MICROTUBULE_BASED_TRANSPORT	163	-0.414249	-1.45793	0.00713351	0.0554095	0.0444391	3608	tags=29%, list=19%, signal=24%	BLOC1S2/RABL2B/SPG11/MAK/HNRNPU/TRAF3IP1/SFPQ/KIF27/TTC30A/RAB21/TRIP11/IFT20/CLN3/VAMP7/PURA/TUB/SPAG16/RAB1A/IFT80/KIF3B/RPGR/OPA1/DYNC1I2/AP3S1/SPAST/IFT27/KIFAP3/IFT81/KIF1B/STK36/KIF5B/AP3B1/SSX2IP/DYNC2H1/FBXW11/WDR35/DYNC2LI1/RHOT1/TNPO1/RAB27B/LRPPRC/WASF1/SYBU/CABYR/MAP2/COPG2/KIF3A
GOBP_REGULATION_OF_RHO_PROTEIN_SIGNAL_TRANSDUCTION	GOBP_REGULATION_OF_RHO_PROTEIN_SIGNAL_TRANSDUCTION	76	0.48618	1.5582	0.00715034	0.0554745	0.0444912	1974	tags=26%, list=10%, signal=24%	ARHGDIB/GPR65/GPR174/P2RY8/LPAR6/APOA1/RASGRF1/GPR18/P2RY10/CDC42SE1/ARHGEF3/CDC42SE2/LPAR1/DLC1/APOE/HEG1/ADRA1A/APOC3/F2R/ARRB1
GOBP_POSITIVE_REGULATION_OF_SYNAPTIC_TRANSMISSION_GABAERGIC	GOBP_POSITIVE_REGULATION_OF_SYNAPTIC_TRANSMISSION_GABAERGIC	12	-0.791813	-1.73462	0.00725688	0.0562343	0.0451007	1243	tags=25%, list=7%, signal=23%	OXTR/KIF5B/TAC1
GOBP_REGULATION_OF_RENAL_SYSTEM_PROCESS	GOBP_REGULATION_OF_RENAL_SYSTEM_PROCESS	30	-0.608697	-1.63583	0.00732982	0.0567164	0.0454873	1145	tags=17%, list=6%, signal=16%	AGTR1/F2RL1/GJA1/STC1/TAC1
GOBP_CELLULAR_RESPONSE_TO_AMYLOID_BETA	GOBP_CELLULAR_RESPONSE_TO_AMYLOID_BETA	35	0.605098	1.66597	0.00733641	0.0567164	0.0454873	1726	tags=34%, list=9%, signal=31%	FYN/ITGA4/VCAM1/FCGR2B/ICAM1/NGFR/TLR4/LGMN/LRP1/CASP4/ABCC1/PRNP
GOMF_TOLL_LIKE_RECEPTOR_BINDING	GOMF_TOLL_LIKE_RECEPTOR_BINDING	12	0.795799	1.74765	0.00738407	0.0570175	0.0457288	2062	tags=58%, list=11%, signal=52%	S100A8/SYK/MYD88/TLR2/TLR1/S100A9/LY96
GOBP_MRNA_TRANSPORT	GOBP_MRNA_TRANSPORT	129	-0.421456	-1.44349	0.00739973	0.0570712	0.0457718	4725	tags=40%, list=25%, signal=30%	G3BP2/NUP98/ARC/SARNP/UPF3B/SEC13/IWS1/THOC1/PCID2/CPSF2/NCBP1/NCBP2/POM121C/AGFG1/HNRNPA2B1/CPSF4/RAE1/MAGOHB/NUP43/SENP2/EIF4A3/NUP153/ENY2/SMG7/CPSF3/FMR1/NUP35/NUP160/SEH1L/NUP37/SLU7/XPO1/TPR/NUP133/POM121/UPF2/THOC7/THOC2/CASC3/NSUN2/NUP107/RANBP2/LRPPRC/AHCTF1/NUP205/NUP155/EIF5A2/IGF2BP2/IGF2BP3/CETN3/IGF2BP1
GOBP_CARDIAC_CONDUCTION_SYSTEM_DEVELOPMENT	GOBP_CARDIAC_CONDUCTION_SYSTEM_DEVELOPMENT	13	-0.795845	-1.79499	0.00741543	0.057125	0.045815	709	tags=23%, list=4%, signal=22%	BMPR1A/TBX3/DSG2
GOBP_INTRACILIARY_TRANSPORT	GOBP_INTRACILIARY_TRANSPORT	46	-0.556467	-1.6434	0.00745788	0.0573379	0.0459857	4602	tags=50%, list=24%, signal=38%	IFT46/IFT88/TTC21B/IFT172/RABL2B/MAK/TRAF3IP1/TTC30A/TRIP11/IFT20/TUB/IFT80/KIF3B/RPGR/IFT27/KIFAP3/IFT81/SSX2IP/DYNC2H1/WDR35/DYNC2LI1/TNPO1/KIF3A
GOBP_RESPONSE_TO_LAMINAR_FLUID_SHEAR_STRESS	GOBP_RESPONSE_TO_LAMINAR_FLUID_SHEAR_STRESS	12	0.795574	1.74716	0.00746058	0.0573379	0.0459857	647	tags=33%, list=3%, signal=32%	ETS1/KLF2/KLF4/ASS1
GOBP_DETECTION_OF_ABIOTIC_STIMULUS	GOBP_DETECTION_OF_ABIOTIC_STIMULUS	131	-0.429323	-1.47342	0.00751666	0.0577012	0.0462771	1389	tags=11%, list=7%, signal=10%	MKKS/EYS/METAP2/GPR52/PTK2/SERPINE2/ANO1/TRPM8/CDS1/COL11A1/PLEKHB1/ITGA2/CALCA/TAC1
GOBP_POSITIVE_REGULATION_OF_RHO_PROTEIN_SIGNAL_TRANSDUCTION	GOBP_POSITIVE_REGULATION_OF_RHO_PROTEIN_SIGNAL_TRANSDUCTION	30	0.630443	1.68475	0.00753846	0.0578008	0.0463569	1974	tags=37%, list=10%, signal=33%	GPR65/GPR174/P2RY8/LPAR6/APOA1/GPR18/P2RY10/ARHGEF3/LPAR1/F2R/ARRB1
GOBP_NUCLEAR_TRANSCRIBED_MRNA_CATABOLIC_PROCESS_NONSENSE_MEDIATED_DECAY	GOBP_NUCLEAR_TRANSCRIBED_MRNA_CATABOLIC_PROCESS_NONSENSE_MEDIATED_DECAY	112	0.454434	1.53858	0.0075635	0.0579149	0.0464485	3488	tags=45%, list=18%, signal=37%	RPS15/RPS26/RPS9/RPL21/MAGOH/RPL13/RPS19/RPS29/RPL18/RPS11/RPL28/RPL35/RPL18A/RPS5/RPL13A/RPL29/RPL7A/RPL41/RPS4X/RPLP2/RPLP1/RPS28/RPL3/RPS8/RPL24/RPL11/RNPS1/PARN/RPL10/RPL12/RPS6/RPL10A/RPS27/RPS2/RPS15A/RPS16/UBA52/RPS17/RPS3/SMG1/RPL6/RPL4/RPL37/RPL34/RPL8/UPF3A/RPS25/RPL37A/RPL19/RPL9
GOBP_REGULATION_OF_ACTION_POTENTIAL	GOBP_REGULATION_OF_ACTION_POTENTIAL	51	-0.56769	-1.70407	0.00757104	0.0579149	0.0464485	2050	tags=25%, list=11%, signal=23%	CAV1/DLG1/GBA/FMR1/AKAP9/CD36/ATP2A2/CXADR/KCNB1/DSP/DSC2/DSG2/TAC1
GOBP_AMINO_ACID_ACTIVATION	GOBP_AMINO_ACID_ACTIVATION	29	-0.637622	-1.69687	0.00758822	0.0579786	0.0464995	5239	tags=72%, list=28%, signal=53%	PPA1/AASDH/WARS2/EARS2/TARS2/PPA2/RARS2/AARS2/DALRD3/QRSL1/AARSD1/YARS2/MARS2/DARS2/HARS2/AIMP1/AIMP2/FARSB/IARS2/EEF1E1/NARS2
GOBP_CHONDROITIN_SULFATE_BIOSYNTHETIC_PROCESS	GOBP_CHONDROITIN_SULFATE_BIOSYNTHETIC_PROCESS	25	0.669646	1.72601	0.00766111	0.0584673	0.0468915	2794	tags=48%, list=15%, signal=41%	DCN/VCAN/CHST11/DSE/CHST15/CSGALNACT2/CHST9/XYLT1/CSGALNACT1/BGN/CHST12/CHST13
GOBP_REGULATION_OF_WNT_SIGNALING_PATHWAY	GOBP_REGULATION_OF_WNT_SIGNALING_PATHWAY	336	-0.35353	-1.33755	0.00776548	0.059135	0.047427	3302	tags=25%, list=17%, signal=21%	TLE1/PSMC3/ARNTL/WNT5A/TNKS2/TMEM198/NLE1/CTNND1/VGLL4/SENP2/COL1A1/ANKRD6/SMARCA4/LGR4/IFT20/PSMB4/ZNF703/JUP/CTNNB1/FZD4/USP8/KLF15/SCYL2/FZD7/GSK3B/DKK3/PTPRU/PSME3/PSMC5/PSMD4/CAV1/IFT80/LIMD1/APC/NOTUM/PSMD6/CSNK2A1/PSMC2/PSMA1/TSKU/CAPRIN2/APCDD1/CSNK1G3/GRB10/PSMC6/TMEM64/WLS/XIAP/UBE2B/EGF/DIXDC1/SOX9/BICC1/PPP2CA/FOLR1/TMEM9/PSMD11/CDC73/SULF1/SNAI2/KLHL12/PSMD14/NLK/DEPDC1B/USP47/GREM1/…
GOBP_REGULATION_OF_DENDRITIC_CELL_DIFFERENTIATION	GOBP_REGULATION_OF_DENDRITIC_CELL_DIFFERENTIATION	12	0.793355	1.74229	0.00776666	0.059135	0.047427	3515	tags=83%, list=18%, signal=68%	FCGR2B/LILRB2/HLA-B/LGALS9/TMEM176A/LILRB1/AGER/ZBTB46/HMGB1/TMEM176B
GOBP_CELL_ADHESION_MEDIATED_BY_INTEGRIN	GOBP_CELL_ADHESION_MEDIATED_BY_INTEGRIN	67	0.517528	1.62032	0.00780753	0.0592493	0.0475187	937	tags=24%, list=5%, signal=23%	CCL5/ITGB2/ITGA4/SKAP1/CD3E/FERMT3/ITGBL1/LPXN/ITGB7/SYK/PTPN6/LYN/ICAM1/NCKAP1L/CXCL13/VTN
GOBP_POSITIVE_REGULATION_OF_PROTEIN_TARGETING_TO_MEMBRANE	GOBP_POSITIVE_REGULATION_OF_PROTEIN_TARGETING_TO_MEMBRANE	20	0.707574	1.75297	0.00780753	0.0592493	0.0475187	1988	tags=40%, list=10%, signal=36%	ITGB2/FYN/ITGAM/CIB1/AKT2/STOM/PRNP/ANK3
GOBP_ADENYLATE_CYCLASE_ACTIVATING_G_PROTEIN_COUPLED_RECEPTOR_SIGNALING_PATHWAY	GOBP_ADENYLATE_CYCLASE_ACTIVATING_G_PROTEIN_COUPLED_RECEPTOR_SIGNALING_PATHWAY	117	0.44741	1.51251	0.00782346	0.0592493	0.0475187	2290	tags=25%, list=12%, signal=22%	CXCL9/GPR65/CXCL10/PTGER2/GNG2/PTGER4/PTGFR/PDE4B/ADCY7/CXCL11/GNAI2/RAMP3/ADRA2A/PTH1R/S1PR5/ATP2B4/ADCY3/LPAR1/PLN/GNAS/CNR1/S1PR2/ADRA1A/DRD1/S1PR1/PDE4D/PF4/GNB1/ADCY4
GOBP_MICROTUBULE_BASED_MOVEMENT	GOBP_MICROTUBULE_BASED_MOVEMENT	306	-0.360298	-1.35078	0.00783915	0.0592493	0.0475187	2670	tags=17%, list=14%, signal=15%	IFT20/CLN3/VAMP7/PURA/TUB/KIFC2/SPAG16/KPNB1/RAB1A/DNAH14/IFT80/KIF3B/TMF1/IQCG/RPGR/OPA1/DYNC1I2/AP3S1/SPAST/IFT27/KIFAP3/KIF20A/IFT81/KIF1B/STK36/BBS2/UBE2B/MKKS/KIF5B/AP3B1/SSX2IP/DYNC2H1/DNAH12/KIF16B/FBXW11/WDR35/DYNC2LI1/RHOT1/CELSR2/TNPO1/RAB27B/LRPPRC/WASF1/SYBU/VPS13A/CABYR/MAP2/KIF21A/COPG2/KIF3A/TEX101/DNAH11
GOBP_NEGATIVE_REGULATION_OF_T_CELL_PROLIFERATION	GOBP_NEGATIVE_REGULATION_OF_T_CELL_PROLIFERATION	59	0.547114	1.66931	0.00784041	0.0592493	0.0475187	2659	tags=44%, list=14%, signal=38%	IDO1/LILRB2/HLA-DRB1/PTPN6/CD86/SPN/PLA2G2D/GPNMB/CLEC4G/CTLA4/LGALS9/HAVCR2/LRRC32/PDCD1LG2/BMP4/CD80/IL2RA/LILRB1/PRNP/TNFRSF14/CR1/CRTAM/VSIG4/CBLB/ARG1/LILRB4
GOMF_CHEMOKINE_ACTIVITY	GOMF_CHEMOKINE_ACTIVITY	42	0.576981	1.66553	0.00784041	0.0592493	0.0475187	2387	tags=48%, list=13%, signal=42%	CCL5/CXCL9/CXCL10/CXCL12/CXCL14/CCL2/CCL18/CXCL11/CXCL2/CXCL13/CX3CL1/CCL8/CCL20/PPBP/CCL19/CCL21/PF4/CCL25/CCL3/CCL23
GOBP_POSITIVE_REGULATION_OF_CYTOKINE_PRODUCTION_INVOLVED_IN_INFLAMMATORY_RESPONSE	GOBP_POSITIVE_REGULATION_OF_CYTOKINE_PRODUCTION_INVOLVED_IN_INFLAMMATORY_RESPONSE	21	0.702407	1.75967	0.00784725	0.0592493	0.0475187	1753	tags=38%, list=9%, signal=35%	GBP5/CLEC7A/MYD88/TLR4/IL17D/GPSM3/STAT3/NOD2
GOBP_CANONICAL_WNT_SIGNALING_PATHWAY	GOBP_CANONICAL_WNT_SIGNALING_PATHWAY	310	-0.36365	-1.36396	0.00785406	0.0592493	0.0475187	3302	tags=24%, list=17%, signal=20%	TLE1/PSMC3/ARNTL/WNT5A/TNKS2/TMEM198/HESX1/NLE1/CTNND1/COL1A1/ANKRD6/FZD8/EXT1/LGR4/IFT20/PSMB4/ZNF703/JUP/CTNNB1/FZD4/USP8/LRP5/SCYL2/FZD7/GSK3B/DKK3/RYK/PTPRU/PSME3/PSMC5/PSMD4/CAV1/LIMD1/APC/NOTUM/PSMD6/PSMC2/PSMA1/CAPRIN2/CSNK1G3/PSMC6/TMEM64/WLS/XIAP/UBE2B/EGF/DIXDC1/SOX9/BICC1/FOLR1/TMEM9/PSMD11/SNAI2/KLHL12/PSMD14/USP47/GREM1/BMP2/RSPO2/FZD6/NKD1/YAP1/UBR5/PSMD12/STK3/CTHRC1/BAMBI/LGR5/ZNR…
GOMF_PHOSPHATIDYLINOSITOL_BISPHOSPHATE_BINDING	GOMF_PHOSPHATIDYLINOSITOL_BISPHOSPHATE_BINDING	93	-0.456549	-1.50193	0.00792344	0.0596804	0.0478644	2623	tags=28%, list=14%, signal=24%	ANXA9/ASAP1/KRIT1/SH3PXD2B/PARD3/MYO1B/FZD7/SVIL/TULP3/SESTD1/CLVS1/HIP1/STXBP6/TTPAL/KIF16B/PLEK2/KCNH1/WIPI1/TWF1/SYT1/PLEKHA5/VIL1/CLVS2/PLCB1/PFN2/LAPTM4B
GOCC_AXOLEMMA	GOCC_AXOLEMMA	11	-0.792176	-1.69101	0.00792943	0.0596804	0.0478644	384	tags=36%, list=2%, signal=36%	MYO1D/ROBO2/KCNC2/CNTNAP2
GOBP_CARDIAC_CHAMBER_DEVELOPMENT	GOBP_CARDIAC_CHAMBER_DEVELOPMENT	145	-0.415978	-1.45083	0.00798583	0.060028	0.0481432	2594	tags=20%, list=14%, signal=17%	SALL4/FRS2/CHD7/MATR3/JAG1/PARVA/AP2B1/TPM1/MED1/HECTD1/CPE/PPP1R13L/FOXH1/PTCD2/SOS1/BMPR1A/ZMPSTE24/TBX3/BMP2/DSP/HOXA13/COL11A1/TMEM65/ROBO2/SOX4/ROBO1/HEY1/SFRP2/SEMA3C
GOBP_BONE_CELL_DEVELOPMENT	GOBP_BONE_CELL_DEVELOPMENT	30	0.628288	1.67899	0.00800312	0.060028	0.0481432	3200	tags=53%, list=17%, signal=44%	FLI1/PTPN6/PIP4K2A/TYROBP/NOTCH2/WASF2/GPR68/ATP6AP1/LILRB1/SRC/LRRK1/KIT/SH2B3/FBN1/ZNF385A/FBXW7
GOCC_CLATHRIN_COATED_VESICLE	GOCC_CLATHRIN_COATED_VESICLE	186	0.399296	1.42305	0.00800312	0.060028	0.0481432	1966	tags=17%, list=10%, signal=16%	HLA-DRB4/IL7R/CD3D/CD3G/HLA-DRB5/CD74/CD4/HLA-DPA1/HLA-DRB1/HLA-DPB1/RGS19/HLA-DQA1/HLA-DRA/RAB27A/HLA-DQB1/CFTR/RAB8B/CTLA4/AP2M1/TNK2/DENND1C/LRP1/NECAP2/VAMP2/EPN1/EREG/APOE/SYT11/CD207/STON1/RAB14/M6PR
GOBP_PHOSPHOLIPASE_C_ACTIVATING_G_PROTEIN_COUPLED_RECEPTOR_SIGNALING_PATHWAY	GOBP_PHOSPHOLIPASE_C_ACTIVATING_G_PROTEIN_COUPLED_RECEPTOR_SIGNALING_PATHWAY	98	0.457616	1.5304	0.00809741	0.0606657	0.0486546	2417	tags=27%, list=13%, signal=23%	CX3CR1/GPR65/GPR174/P2RY8/LPAR6/ACTN2/FPR1/C5AR1/GPR18/ESR1/P2RY10/C3AR1/FPR3/HTR2B/ADRA2A/PTH1R/LPAR1/ADRA1A/F2R/DRD1/S1PR1/GNA15/TGM2/GNB1/P2RY12/GNA11
GOMF_MONOCARBOXYLIC_ACID_TRANSMEMBRANE_TRANSPORTER_ACTIVITY	GOMF_MONOCARBOXYLIC_ACID_TRANSMEMBRANE_TRANSPORTER_ACTIVITY	63	-0.523492	-1.63214	0.00815258	0.0610092	0.0489302	1834	tags=29%, list=10%, signal=26%	SLC5A6/SLC6A1/SLC16A6/SLC10A5/SLC16A9/SLC25A13/SLCO1A2/CD36/SLCO1B3/SLC1A2/ABCG2/SLC16A1/SLC26A6/SLC22A9/SLC6A11/SLC16A14/SLC16A7/SLC7A11
GOMF_LIGASE_ACTIVITY	GOMF_LIGASE_ACTIVITY	115	-0.448337	-1.50776	0.00819556	0.0612608	0.049132	4537	tags=44%, list=24%, signal=34%	MOCS3/RARS2/PCCB/GSS/GLUL/TTLL4/RIMKLB/AARS2/DALRD3/SAE1/QRSL1/ACSM2A/SUCLA2/GART/ACSM4/AARSD1/ACSBG2/ATG7/PFAS/YARS2/MARS2/ATP6V1A/TTLL2/NAE1/ASNSD1/LIG3/DARS2/MTHFD1L/PPCS/HARS2/PAICS/ACSF2/MCCC2/CTPS2/FARSB/GCLC/UBA2/ACSL6/ACACA/ACSL4/CAD/IARS2/HLCS/UBA5/ACSM1/ACSS2/ACSL3/ACSS3/NARS2/GCLM/ASNS
GOBP_VESICLE_TARGETING	GOBP_VESICLE_TARGETING	86	-0.488918	-1.58533	0.00826261	0.0616759	0.0494649	3943	tags=48%, list=21%, signal=38%	CD59/TMED2/SEC24D/TRAPPC6B/SEC24B/SEC23IP/F5/TRAPPC2/SEC22B/SEC23A/WDR11/TRAPPC4/GOSR1/CLASP2/TRIP11/TMED9/SEC31A/ARFGAP3/TGFA/RAB1A/SAR1B/STARD3NL/PREB/TFG/PDCD6/GOSR2/NSF/AP1AR/BET1/SCFD1/ANKRD28/SEC16B/FOLR1/MCFD2/FAM91A1/SEC24A/KLHL12/WIPI1/TBC1D23/AP1M2/C17orf75
GOBP_INOSITOL_TRISPHOSPHATE_METABOLIC_PROCESS	GOBP_INOSITOL_TRISPHOSPHATE_METABOLIC_PROCESS	10	0.812496	1.70398	0.00827918	0.0616759	0.0494649	556	tags=30%, list=3%, signal=29%	PTAFR/PTK2B/ITPKB
GOBP_DENDRITIC_CELL_APOPTOTIC_PROCESS	GOBP_DENDRITIC_CELL_APOPTOTIC_PROCESS	11	0.808777	1.7376	0.00827935	0.0616759	0.0494649	2216	tags=73%, list=12%, signal=64%	CCR7/CXCL12/LYN/LGALS9/LILRB1/CCL19/CCL21/AXL
GOBP_POSITIVE_REGULATION_OF_STRESS_ACTIVATED_PROTEIN_KINASE_SIGNALING_CASCADE	GOBP_POSITIVE_REGULATION_OF_STRESS_ACTIVATED_PROTEIN_KINASE_SIGNALING_CASCADE	109	0.44927	1.51673	0.00836282	0.062227	0.0499068	1982	tags=28%, list=10%, signal=25%	CCR7/RASSF2/FCGR2B/CLEC7A/LYN/RASGRP1/MYD88/PTK2B/SPI1/ARL6IP5/IL1B/TRAF1/MAP3K3/SERPINF2/IL26/CD27/GADD45B/TLR4/RIPK2/TRAF3/GADD45G/SLAMF1/HAND2/ZC3H12A/RELL1/NOD2/PYCARD/MFHAS1/CCL19/CCL21
GOBP_TRIGLYCERIDE_RICH_LIPOPROTEIN_PARTICLE_REMODELING	GOBP_TRIGLYCERIDE_RICH_LIPOPROTEIN_PARTICLE_REMODELING	14	0.76663	1.72445	0.00846931	0.0629478	0.050485	3422	tags=71%, list=18%, signal=59%	APOA1/LIPC/APOA5/LCAT/CETP/APOE/APOC2/APOC3/APOA4/APOA2
GOBP_REGULATION_OF_HIGH_VOLTAGE_GATED_CALCIUM_CHANNEL_ACTIVITY	GOBP_REGULATION_OF_HIGH_VOLTAGE_GATED_CALCIUM_CHANNEL_ACTIVITY	13	0.773145	1.71019	0.00854063	0.063406	0.0508524	2336	tags=46%, list=12%, signal=41%	FGF14/PDE4B/GEM/CALM1/CACNB2/CALM3
GOBP_RNA_SPLICING	GOBP_RNA_SPLICING	390	-0.339039	-1.3025	0.00856773	0.0635351	0.050956	4477	tags=33%, list=24%, signal=26%	UPF3B/DHX15/TGS1/IWS1/TRA2A/CLK4/PRPF38B/THOC1/SNRNP25/TXNL4A/NCL/CPSF2/POLR2G/SNRPG/NCBP1/SMN1/NCBP2/PRPF4B/GTF2F2/ZBTB8OS/GEMIN5/LARP7/BUD13/RBM39/ZRANB2/SYF2/TSEN15/LUC7L2/HNRNPF/PPWD1/HNRNPA2B1/GRSF1/SNRPD1/SNW1/SNRPB2/C9orf78/HNRNPU/METTL14/CLNS1A/LSM3/CPSF4/CLP1/SFPQ/NUDT21/RBM12B/HNRNPR/SMN2/HNRNPH2/MAGOHB/FAM98B/RSRC1/DHX35/DDX41/PNN/HNRNPA3/DDX46/LSM1/PSIP1/EFTUD2/ZNF638/RBM17/EIF4A3/DDX…
GOBP_REGULATION_OF_SYNAPTIC_TRANSMISSION_GABAERGIC	GOBP_REGULATION_OF_SYNAPTIC_TRANSMISSION_GABAERGIC	30	-0.600003	-1.61246	0.00861072	0.0637648	0.0511401	3	tags=13%, list=0%, signal=13%	CLN3/OXTR/KIF5B/TAC1
GOBP_REGULATION_OF_GRANULOCYTE_DIFFERENTIATION	GOBP_REGULATION_OF_GRANULOCYTE_DIFFERENTIATION	15	0.741812	1.71253	0.00861817	0.0637648	0.0511401	492	tags=33%, list=3%, signal=32%	EVI2B/LEF1/HCLS1/C1QC/INPP5D
GOBP_NEGATIVE_REGULATION_OF_TYPE_I_INTERFERON_PRODUCTION	GOBP_NEGATIVE_REGULATION_OF_TYPE_I_INTERFERON_PRODUCTION	42	0.572806	1.65348	0.00863149	0.0637912	0.0511613	3183	tags=45%, list=17%, signal=38%	NLRC5/NLRC3/TNFAIP3/ISG15/HAVCR2/REL/TRIM25/RNF135/RNF125/LILRB1/PYCARD/UBA7/CYLD/IKBKE/SIRPA/PTPRS/RELB/IRF3/OTUD5
GOMF_HELICASE_ACTIVITY	GOMF_HELICASE_ACTIVITY	146	-0.414233	-1.44195	0.00870908	0.064292	0.051563	3388	tags=38%, list=18%, signal=31%	MCM6/SMARCA5/RFC3/GTF2F2/RAD54B/XRCC6/WRN/DHX30/WRNIP1/DHX36/BTAF1/ASCC3/DNA2/DHX35/EIF4A2/DHX32/DDX41/DDX46/CHD6/DDX55/EIF4A3/DDX5/SMARCA4/IFIH1/MCM7/SHPRH/RFC2/DDX21/CHD7/DQX1/CHD1/DDX53/RECQL/ATRX/DDX10/SMC6/SMARCAD1/CHD1L/DDX59/SMARCA1/DDX42/DDX60/DDX52/HLTF/RAD50/MCM8/DSCC1/DDX11/DDX18/DHX40/G3BP1/DHX29/YTHDC2/DDX1/MCM4
GOBP_MUSCLE_TISSUE_DEVELOPMENT	GOBP_MUSCLE_TISSUE_DEVELOPMENT	333	-0.350908	-1.33072	0.00873699	0.0644016	0.0516509	2563	tags=18%, list=13%, signal=16%	MYH14/FRS2/CHD7/FZD7/SORBS2/NF1/PRKAA1/TPM1/MED1/MTOR/ZFAND5/CAV1/DLG1/CACYBP/ATF3/HDAC9/FOXN2/NEBL/KLF5/SVIL/IGSF8/PRKAR1A/PPP1R13L/AKAP6/ERBB4/ADAMTS9/FOXH1/SOX9/FBXO22/ERBB3/COPS2/SOX6/PTCD2/ALPK3/CXADR/RPS6KB1/BMPR1A/ZMPSTE24/SMYD1/TBX3/CCNB1/GJC1/GREM1/BMP2/NEB/DSP/YAP1/TIPARP/LOX/NLN/FGF2/CSRP2/GJA1/RBM24/COL11A1/MEOX2/HOMER1/ANKRD1/SEMA3C/DSG2/DKK1
GOBP_MONOCYTE_DIFFERENTIATION	GOBP_MONOCYTE_DIFFERENTIATION	34	0.600715	1.65988	0.0087436	0.0644016	0.0516509	1516	tags=29%, list=8%, signal=27%	CD74/CD4/MT1G/HLA-DRB1/CSF1R/INPP5D/IFI16/APCS/GPR68/BMP4
GOBP_CELL_JUNCTION_ASSEMBLY	GOBP_CELL_JUNCTION_ASSEMBLY	398	-0.338571	-1.29748	0.00878571	0.0646391	0.0518414	3243	tags=24%, list=17%, signal=20%	EFNB2/WNT5A/PCDH17/POF1B/PARD6G/LRRN3/VEGFA/LRRTM2/CTNND1/PRKCI/CLDN20/FBXO45/CLDN15/VPS35/SIX4/CLASP2/GPC4/PCDHB11/ZNF703/JUP/CTNNB1/PARD3/LRRTM1/CD9/OXTR/CTTN/NPTN/FBLIM1/ECT2/RYK/GJB6/CDH9/TJP1/CAV1/CBLN4/DLG1/APC/PKN2/CLDN11/BCAS3/LIMCH1/PCDHB6/ACE2/LRRN1/PDCD6IP/CDH6/PRKCA/ERBB4/PTPRK/THBS1/PIP5K1A/NRCAM/GNPAT/PHLDB2/BSN/ROCK2/OCLN/CLDN22/PTK2/EPB41L5/AGRN/CLDN7/CTNNA1/PCDHB16/SNAI2/PCDHB5/L…
GOMF_AMIDE_BINDING	GOMF_AMIDE_BINDING	353	0.352473	1.33462	0.00892923	0.0655203	0.0525481	2203	tags=21%, list=12%, signal=19%	ITM2A/ITGB2/HLA-DRB5/CD74/FCGR2B/AVPR1A/HLA-DPA1/LILRB2/HLA-DRB1/HLA-DPB1/TAP1/HLA-DQA1/MARCO/NPFFR2/ITGAM/ERAP2/HLA-DRA/CD1C/APOA1/HLA-F/CRHBP/C1QA/CD1A/HLA-E/HLA-B/LBP/NFKBIA/CD14/GSTP1/TLR2/HLA-DQB1/CD1B/ANG/HLA-C/TAPBP/RAMP3/CD1E/CST3/NGFR/TLR4/AP2M1/PANK1/CALR/FOLR2/PFDN5/ACOT7/PTH1R/RELA/PSAP/LRP1/TAP2/HLA-A/CLEC4M/ACACB/GPR37/TMEM158/VIPR1/APOE/DBI/CRIP1/FTCD/GHR/PRNP/NOD2/TLR1/INHBA/HLA-H…
GOBP_RIBONUCLEOPROTEIN_COMPLEX_SUBUNIT_ORGANIZATION	GOBP_RIBONUCLEOPROTEIN_COMPLEX_SUBUNIT_ORGANIZATION	168	-0.404329	-1.42636	0.00893533	0.0655203	0.0525481	4247	tags=40%, list=22%, signal=31%	TXNL4A/ERAL1/CPSF6/SNRPG/MRPS7/NCBP1/DYRK3/SMN1/GEMIN5/EIF2S3/LUC7L2/SNRPD1/EIF3B/ZNHIT3/EIF3D/CLNS1A/RPS27L/DHX30/CLP1/NUDT21/ZNHIT6/SMN2/NLE1/MDN1/ATR/MCTS1/PSIP1/EIF6/NOP2/PTGES3/SNRPC/EIF4H/PUF60/SNRPE/EIF3E/CELF1/WDR77/EIF3H/PRPF6/FASTKD2/EIF3J/RPF2/PRPF3/SRPK2/SHQ1/RRS1/EIF3A/HSP90AB1/EIF3M/SLU7/LUC7L3/KIF5B/CDC73/PRPF18/CRNKL1/TAF9/PRMT5/DENR/SRPK1/COIL/BRIX1/DHX29/PTBP2/STRAP/DDX1/ZFAND1/…
GOBP_RESPONSE_TO_MECHANICAL_STIMULUS	GOBP_RESPONSE_TO_MECHANICAL_STIMULUS	188	0.397169	1.41672	0.0089355	0.0655203	0.0525481	2663	tags=27%, list=14%, signal=23%	FYN/CXCL10/BTG2/PTGER4/CASP1/CXCL12/DCN/ETS1/FAS/CXCR4/FOSB/TLR8/GSN/IRF1/MYD88/PTK2B/TXNIP/AKT1/CNN2/FOS/IL1B/NFKBIA/SLC8A1/PTN/AQP1/MMP7/CASP8/TLR4/TNFSF14/RELA/IGFBP2/MBD2/CD40/ENG/NFKB1/TLR7/MDK/SRC/ATP1A2/PDE2A/BDKRB1/SHANK3/KIT/GATA4/JUN/BMP6/RAF1/MAPK3/HDAC4/TRPV4
GOMF_OXIDOREDUCTASE_ACTIVITY_ACTING_ON_NAD_P_H_OXYGEN_AS_ACCEPTOR	GOMF_OXIDOREDUCTASE_ACTIVITY_ACTING_ON_NAD_P_H_OXYGEN_AS_ACCEPTOR	15	0.736319	1.69985	0.00907577	0.0664744	0.0533133	3065	tags=53%, list=16%, signal=45%	CYBB/CYBA/NCF2/MICAL1/NCF4/DUOX2/DUOX1/KMO
GOBP_MACROPHAGE_ACTIVATION_INVOLVED_IN_IMMUNE_RESPONSE	GOBP_MACROPHAGE_ACTIVATION_INVOLVED_IN_IMMUNE_RESPONSE	18	0.732296	1.75388	0.00915327	0.0669101	0.0536627	3977	tags=72%, list=21%, signal=57%	SYK/IL33/LBP/TYROBP/HAVCR2/IFNG/SUCNR1/GRN/TREM2/HMGB1/IFI35/TICAM1/SBNO2
GOBP_EXTRINSIC_APOPTOTIC_SIGNALING_PATHWAY_VIA_DEATH_DOMAIN_RECEPTORS	GOBP_EXTRINSIC_APOPTOTIC_SIGNALING_PATHWAY_VIA_DEATH_DOMAIN_RECEPTORS	80	0.484851	1.55827	0.00915569	0.0669101	0.0536627	3944	tags=51%, list=21%, signal=41%	FAS/TNFSF10/HGF/TMC8/BMP5/BCL2/ICAM1/TNFAIP3/STK4/HMOX1/FGA/CASP8/LGALS3/CFLAR/FGG/FGB/GABARAP/TIMP3/PMAIP1/STX4/TRADD/SFRP1/GPX1/SP100/FAF1/RAF1/ARHGEF2/BRCA1/TNF/DEDD2/ZDHHC3/TNFRSF10B/DAXX/RIPK1/FEM1B/BID/FASLG/HMGB2/TNFRSF10A/TNFRSF10C/ITPRIP
GOCC_SPLICEOSOMAL_COMPLEX	GOCC_SPLICEOSOMAL_COMPLEX	169	-0.402862	-1.4224	0.00921243	0.0671954	0.0538916	4468	tags=38%, list=23%, signal=30%	BUD31/CWC15/DHX15/TRA2A/PRPF38B/SNRNP25/TXNL4A/NCL/SNRPG/PRPF4B/BUD13/SYF2/LUC7L2/HNRNPF/PPWD1/HNRNPA2B1/SNRPD1/SNW1/SNRPB2/C9orf78/HNRNPU/LSM3/HNRNPR/MAGOHB/DHX35/DHX32/DDX41/PNN/HNRNPA3/RHEB/EFTUD2/RBM17/EIF4A3/DDX5/SNRPC/ZCRB1/PRPF40A/SNRPE/DQX1/PPIH/RBM41/PRPF6/MYEF2/LSM5/API5/MFAP1/IK/PLRG1/HNRNPH1/BCAS2/PRPF3/SNRNP48/PPIL1/SLU7/LUC7L3/PRPF18/CRNKL1/CWC27/CASC3/HTATSF1/RBM28/IVNS1ABP/CDC5L/P…
GOBP_WNT_SIGNALING_PATHWAY_INVOLVED_IN_HEART_DEVELOPMENT	GOBP_WNT_SIGNALING_PATHWAY_INVOLVED_IN_HEART_DEVELOPMENT	11	-0.787325	-1.68065	0.00921525	0.0671954	0.0538916	496	tags=18%, list=3%, signal=18%	BMP2/DKK1
GOBP_NEGATIVE_REGULATION_OF_STRIATED_MUSCLE_CELL_DIFFERENTIATION	GOBP_NEGATIVE_REGULATION_OF_STRIATED_MUSCLE_CELL_DIFFERENTIATION	31	-0.623601	-1.68003	0.00926862	0.0675094	0.0541434	996	tags=10%, list=5%, signal=9%	SOX6/BMP2/DKK1
GOBP_REGULATION_OF_NEURON_PROJECTION_REGENERATION	GOBP_REGULATION_OF_NEURON_PROJECTION_REGENERATION	27	0.64432	1.70057	0.00930456	0.0676207	0.0542327	3345	tags=44%, list=18%, signal=37%	HGF/KLF4/FLNA/PTN/LRP1/GRN/PRRX1/THY1/PTPRS/EPHA4/MAP2K1/STK24
GOBP_POSITIVE_REGULATION_OF_T_CELL_APOPTOTIC_PROCESS	GOBP_POSITIVE_REGULATION_OF_T_CELL_APOPTOTIC_PROCESS	12	0.786033	1.72621	0.00930456	0.0676207	0.0542327	1332	tags=33%, list=7%, signal=31%	CCL5/IDO1/LGALS9/TP53
GOBP_REGULATION_OF_PLATELET_ACTIVATION	GOBP_REGULATION_OF_PLATELET_ACTIVATION	33	0.600139	1.63377	0.00932415	0.067688	0.0542866	2751	tags=45%, list=14%, signal=39%	PLEK/FCER1G/PDGFRA/SYK/LYN/TLR4/PRKCD/PRKCQ/SELP/APOE/TXK/HRG/SH2B3/C1QTNF1/PDPN
GOCC_VACUOLAR_MEMBRANE	GOCC_VACUOLAR_MEMBRANE	378	0.349915	1.33304	0.0093445	0.0677606	0.0543448	2886	tags=26%, list=15%, signal=23%	HLA-DRB4/TRAF3IP3/HLA-DMB/GIMAP5/HLA-DRB5/CD74/HLA-DPA1/HLA-DMA/LAPTM5/HLA-DOA/HLA-DRB1/AP1S2/HLA-DPB1/HLA-DOB/CD68/HLA-DQA1/HLA-DRA/OCA2/TLR8/HLA-F/MREG/LAMP3/SLC15A3/CYBRD1/FPR1/PIGR/ATP6V0C/MAN2B1/C3AR1/ATP6V1B2/MAP1LC3B/GNB4/HLA-DQB1/CFTR/CD1B/DRAM1/SLC39A14/ATP6V0D1/ATP11B/ENTPD4/HPSE/SLCO4C1/AP2M1/SLC44A2/LITAF/PRCP/BST2/COL6A1/BRI3/PSAP/LRP1/GABARAP/RAB37/TLR7/ABHD6/GRN/ATP8A1/SYT11/STOM/L…
GOBP_T_CELL_LINEAGE_COMMITMENT	GOBP_T_CELL_LINEAGE_COMMITMENT	26	0.658089	1.72109	0.00943885	0.068369	0.0548328	1641	tags=42%, list=9%, signal=39%	IL23A/SLAMF6/IRF4/SPN/BCL2/IL7/LY9/IL12RB1/TP53/TNFSF18/STAT3
GOBP_REGULATION_OF_CHOLESTEROL_METABOLIC_PROCESS	GOBP_REGULATION_OF_CHOLESTEROL_METABOLIC_PROCESS	55	-0.519535	-1.56767	0.00950406	0.0687653	0.0551506	2560	tags=38%, list=13%, signal=33%	MBTPS2/FASN/PRKAA1/KPNB1/PMVK/GPAM/GGPS1/ACADL/FDPS/HMGCS1/ERLIN2/ACACA/DHCR7/NFYB/IDI1/TM7SF2/SQLE/HMGCR/ARV1/CYP51A1/CYP7A1
GOBP_POSITIVE_REGULATION_OF_CYTOKINE_PRODUCTION_INVOLVED_IN_IMMUNE_RESPONSE	GOBP_POSITIVE_REGULATION_OF_CYTOKINE_PRODUCTION_INVOLVED_IN_IMMUNE_RESPONSE	52	0.543402	1.6326	0.00959716	0.0693622	0.0556294	2235	tags=37%, list=12%, signal=32%	CD74/SASH3/LAPTM5/CLEC7A/HK1/CD226/GPRC5B/HLA-F/HLA-E/IL1B/MALT1/TLR4/GATA3/HLA-A/CD81/LILRB1/NOD2/B2M/TNFRSF14
GOMF_INTERLEUKIN_1_RECEPTOR_BINDING	GOMF_INTERLEUKIN_1_RECEPTOR_BINDING	12	0.783824	1.72135	0.00961214	0.069394	0.0556548	1300	tags=42%, list=7%, signal=39%	MYD88/IL1B/IL1RAP/IRAK4/IL1RN
GOBP_REGULATION_OF_ACTIN_CYTOSKELETON_REORGANIZATION	GOBP_REGULATION_OF_ACTIN_CYTOSKELETON_REORGANIZATION	38	0.580834	1.63896	0.00963205	0.069461	0.0557086	1366	tags=26%, list=7%, signal=24%	ARHGDIB/GMFG/HCK/HCLS1/PDGFRA/CSF1R/PTK2B/TEK/NOTCH2/STAP1
GOBP_GLIOGENESIS	GOBP_GLIOGENESIS	262	0.378219	1.39807	0.00964327	0.0694655	0.0557122	1641	tags=19%, list=9%, signal=17%	S100A8/CX3CR1/PRKCH/CCL2/CCR2/LEF1/ANXA1/GPR183/CXCR4/CSF1R/LYN/KCNJ10/TIAM1/LAMA2/VIM/GSN/TSPO/TNFRSF1B/PTK2B/IL33/C1QA/C5AR1/AKT1/EGR2/IL1B/NTRK2/CDKN2C/GSTP1/TLR2/IDH2/PTN/SKI/WDR1/TLR4/SUN2/RELA/LRP1/CX3CL1/DUSP10/IFNG/LPAR1/STAP1/BOK/SIRT2/AKT2/PHGDH/DICER1/GRN/STAT3
GOMF_CYSTEINE_TYPE_ENDOPEPTIDASE_ACTIVITY_INVOLVED_IN_APOPTOTIC_PROCESS	GOMF_CYSTEINE_TYPE_ENDOPEPTIDASE_ACTIVITY_INVOLVED_IN_APOPTOTIC_PROCESS	15	0.731461	1.68863	0.00983842	0.0707934	0.0567772	1801	tags=47%, list=9%, signal=42%	CASP1/CASP8/CFLAR/CASP4/CASP10/CASP12/PYCARD
GOBP_MITOCHONDRION_MORPHOGENESIS	GOBP_MITOCHONDRION_MORPHOGENESIS	17	-0.716124	-1.70268	0.00986245	0.0708496	0.0568223	3112	tags=59%, list=16%, signal=49%	POLDIP2/MYH14/DNM1L/OPA1/PANK2/POLG2/NUBPL/SSBP1/PNPT1/WASF1
GOBP_POSITIVE_REGULATION_OF_CELLULAR_COMPONENT_BIOGENESIS	GOBP_POSITIVE_REGULATION_OF_CELLULAR_COMPONENT_BIOGENESIS	468	0.321618	1.24961	0.00986788	0.0708496	0.0568223	2749	tags=22%, list=14%, signal=19%	RAC2/CORO1A/GBP5/LCP1/GPR65/PLEK/CCR7/SKAP1/GMFG/DOCK11/HCK/CLEC7A/SYK/CDC42EP3/PIP4K2A/GSN/APOA1/EVL/GPM6A/IQGAP1/PTK2B/ICAM1/SEMA4D/FLNA/ESR1/NCKAP1L/MSN/NTRK2/SEMA4A/ATM/TEK/FCHSD2/ARPC2/VASP/DPYSL3/SERPINF2/CXCL13/NAV3/PFN1/ARAP1/LGALS3/TLR4/NIN/WASF2/DYNLL1/CTNNA2/IL1RAP/CORO1B/CEP135/SYNPO2/CX3CL1/CNOT6L/TP53/ATMIN/IFNG/LPAR1/CLSTN2/P2RX7/LRRTM3/SORBS3/SETDB2/DZIP1/SYNPO/ATF7IP/S100A10/SFRP…
GOBP_RESPONSE_TO_MURAMYL_DIPEPTIDE	GOBP_RESPONSE_TO_MURAMYL_DIPEPTIDE	18	0.724854	1.73606	0.00990972	0.0710721	0.0570007	1939	tags=50%, list=10%, signal=45%	PTPN22/VIM/TNFAIP3/NFKBIA/NLRP1/RELA/RIPK2/NOD2/LDOC1
GOBP_NEGATIVE_REGULATION_OF_CARDIOCYTE_DIFFERENTIATION	GOBP_NEGATIVE_REGULATION_OF_CARDIOCYTE_DIFFERENTIATION	11	-0.780248	-1.66554	0.0099296	0.0711368	0.0570526	996	tags=45%, list=5%, signal=43%	FRS2/FZD7/SOX6/BMP2/DKK1
GOBP_HIGH_DENSITY_LIPOPROTEIN_PARTICLE_ASSEMBLY	GOBP_HIGH_DENSITY_LIPOPROTEIN_PARTICLE_ASSEMBLY	15	0.730868	1.68726	0.00999095	0.0714701	0.0573199	3611	tags=67%, list=19%, signal=54%	APOA1/APOA5/LCAT/PRKACB/APOE/APOM/APOA4/APOA2/ABCA7/PRKACA
GOMF_TRNA_METHYLTRANSFERASE_ACTIVITY	GOMF_TRNA_METHYLTRANSFERASE_ACTIVITY	26	-0.649322	-1.69416	0.0100064	0.0714701	0.0573199	3821	tags=50%, list=20%, signal=40%	THUMPD2/LCMT2/METTL2A/METTL2B/TYW3/TRMT12/METTL1/METTL6/TRMT11/TRMT6/NSUN2/TRMT61B/TARBP1
GOBP_REGULATION_OF_RAS_PROTEIN_SIGNAL_TRANSDUCTION	GOBP_REGULATION_OF_RAS_PROTEIN_SIGNAL_TRANSDUCTION	176	0.408402	1.45019	0.0100089	0.0714701	0.0573199	1983	tags=22%, list=10%, signal=20%	ARHGDIB/GPR65/GPR174/FBP1/P2RY8/LPAR6/LYN/RASGRP1/APOA1/RASGRF1/ITPKB/GPR18/RASA3/P2RY10/CDC42SE1/STK19/RAPGEF1/ARHGEF3/CDC42SE2/NOTCH2/PSD4/TIMP2/JAK2/SH3BP1/CBL/RASGRP4/LPAR1/CYTH4/DLC1/APOE/PIK3CG/HEG1/ADRA1A/VAV1/APOC3/F2R/ARRB1/ARHGAP24
GOBP_PROSTANOID_BIOSYNTHETIC_PROCESS	GOBP_PROSTANOID_BIOSYNTHETIC_PROCESS	27	0.640796	1.69127	0.010061	0.0717642	0.0575558	2002	tags=33%, list=11%, signal=30%	CD74/AVPR1A/ANXA1/PTGDS/PTGIS/IL1B/PTGS1/TBXAS1/FABP5
GOBP_ERAD_PATHWAY	GOBP_ERAD_PATHWAY	93	-0.448926	-1.47685	0.0101041	0.0719934	0.0577396	4137	tags=43%, list=22%, signal=34%	DERL1/TMUB2/UBE4A/UBQLN1/ANKZF1/YOD1/UBXN4/GET4/HSPA5/SYVN1/SEL1L/TMEM67/UBQLN2/JKAMP/ERLIN1/UGGT1/HSP90B1/DNAJC10/RHBDD2/AQP11/SVIP/RNFT1/UGGT2/RNF103/USP14/UBE4B/CAV1/UBXN8/ERLEC1/SGTB/PSMC6/STT3B/FOXRED2/RNF139/EDEM3/ERLIN2/FAF2/DNAJB9/CCDC47/FBXO2
GOBP_PEPTIDYL_TYROSINE_DEPHOSPHORYLATION	GOBP_PEPTIDYL_TYROSINE_DEPHOSPHORYLATION	97	0.466382	1.55013	0.0101227	0.0720475	0.057783	2514	tags=26%, list=13%, signal=22%	PTPRC/PTPN22/DUSP2/PTPN6/PTPRE/CDC14A/CDC25B/PTPN18/MTMR7/SSH2/DUSP7/PTPN4/DUSP10/CDKN3/PTPN2/DUSP1/MTM1/PTPN1/MTMR14/DUSP5/PTP4A2/DUSP4/PTPRS/PTPRJ/MTMR3
GOCC_INTERMEDIATE_FILAMENT	GOCC_INTERMEDIATE_FILAMENT	187	-0.398021	-1.42725	0.0101375	0.0720743	0.0578045	466	tags=12%, list=2%, signal=12%	PPL/CLIP1/PNN/EIF6/JUP/NCKIPSD/KRT222/KRTAP5-2/CLDN11/EPPK1/SYNC/KRT8/SHANK2/DSP/FAM83H/UPP2/KRT7/KRT23/INA/MNS1/KRT19/KRT20
GOMF_CALCIUM_DEPENDENT_PROTEIN_KINASE_ACTIVITY	GOMF_CALCIUM_DEPENDENT_PROTEIN_KINASE_ACTIVITY	24	0.660989	1.70071	0.0102123	0.0725129	0.0581562	2479	tags=38%, list=13%, signal=33%	PRKCB/PRKCH/PRKCD/PRKCQ/MAPKAPK3/MKNK2/MAPKAPK2/CCL3/MKNK1
GOBP_CARBOHYDRATE_DERIVATIVE_CATABOLIC_PROCESS	GOBP_CARBOHYDRATE_DERIVATIVE_CATABOLIC_PROCESS	185	0.383907	1.36614	0.0102213	0.0725129	0.0581562	2573	tags=23%, list=14%, signal=20%	CHIT1/APOBEC3C/APOBEC3A/CD44/DCN/AOAH/SAMHD1/PDE4B/VCAN/NUDT7/SDC3/NAGK/LUM/APOBEC3G/AMPD3/CST3/GM2A/ENTPD4/EDEM1/HPSE/PRKCD/ACOT7/MLYCD/PDE7B/PDE1A/TYMP/GLA/PRELP/PDE2A/STAB2/PDE4D/APOBEC2/LYVE1/APOBEC3F/GPC1/GALC/UPP1/DPYD/OGN/MGAT1/ADA/BGN
GOBP_ACTIVATION_OF_TRANSMEMBRANE_RECEPTOR_PROTEIN_TYROSINE_KINASE_ACTIVITY	GOBP_ACTIVATION_OF_TRANSMEMBRANE_RECEPTOR_PROTEIN_TYROSINE_KINASE_ACTIVITY	13	-0.785257	-1.77111	0.0102403	0.0725686	0.0582009	1392	tags=46%, list=7%, signal=43%	EGF/NRG3/GREM1/PDGFC/ANGPT1/EFNA5
GOBP_MUSCLE_CELL_APOPTOTIC_PROCESS	GOBP_MUSCLE_CELL_APOPTOTIC_PROCESS	62	0.520487	1.60954	0.0102644	0.0726607	0.0582748	2901	tags=42%, list=15%, signal=36%	PTK2B/STK4/HMOX1/SOD2/CFLAR/ARRB2/JAK2/TP53/IFNG/HAND2/PDE1A/ZC3H12A/PPP1R10/MDK/DNMT1/ARRB1/CDKN2A/GNB1/CAMK2D/PDCD4/GATA4/MAP3K5/RBM10/NOL3/NUPR1/HSF1
GOMF_AMYLOID_BETA_BINDING	GOMF_AMYLOID_BETA_BINDING	81	0.48395	1.55485	0.010326	0.0729982	0.0585455	1255	tags=20%, list=7%, signal=19%	ITM2A/ITGB2/CD74/FCGR2B/LILRB2/MARCO/ITGAM/APOA1/C1QA/TLR2/RAMP3/CST3/NGFR/TLR4/PFDN5/LRP1
GOCC_GAP_JUNCTION	GOCC_GAP_JUNCTION	29	-0.624079	-1.66083	0.0103344	0.0729982	0.0585455	2142	tags=21%, list=11%, signal=18%	GJB6/TJP1/PANX1/GJC1/GJA1/DBN1
GOBP_CELL_REDOX_HOMEOSTASIS	GOBP_CELL_REDOX_HOMEOSTASIS	39	0.56237	1.59403	0.0103557	0.0730701	0.0586031	510	tags=15%, list=3%, signal=15%	RAC2/CYBB/CYBA/NQO1/HVCN1/NCF2
GOCC_PROTEIN_ACETYLTRANSFERASE_COMPLEX	GOCC_PROTEIN_ACETYLTRANSFERASE_COMPLEX	76	-0.48582	-1.51945	0.0104091	0.0733679	0.058842	4818	tags=45%, list=25%, signal=34%	TAF9B/ZZZ3/RUVBL1/TAF7/NAA11/TRRAP/DMAP1/BRPF3/KAT2A/ACTL6B/YEATS2/UBAP2L/TAF6/ING3/USP22/MORF4L1/MORF4L2/MEAF6/PHF14/ENY2/NAA15/TAF2/MBIP/TAF4/NAA35/ACTL6A/NAA25/TAF9/PHF20L1/BRD8/NAA20/YEATS4/NAA38/TADA1
GOCC_CORNIFIED_ENVELOPE	GOCC_CORNIFIED_ENVELOPE	42	-0.571405	-1.66356	0.0104239	0.073393	0.0588621	665	tags=14%, list=3%, signal=14%	HRNR/PKP4/DSP/DSC2/PI3/DSG2
GOBP_APICAL_JUNCTION_ASSEMBLY	GOBP_APICAL_JUNCTION_ASSEMBLY	79	-0.471399	-1.49654	0.0104974	0.073778	0.0591709	3774	tags=39%, list=20%, signal=32%	MARVELD3/MTDH/TBCD/RAB13/POF1B/PARD6G/PRKCI/CLDN20/CLDN15/PARD3/ECT2/TJP1/DLG1/APC/PKN2/CLDN11/PDCD6IP/ROCK2/OCLN/CLDN22/CLDN7/CTNNA1/SNAI2/CLDN6/CLDN18/CLDN4/PARD6B/MARVELD2/GJA1/CLDN10/DLG5
GOBP_REGULATION_OF_ENDOCRINE_PROCESS	GOBP_REGULATION_OF_ENDOCRINE_PROCESS	34	-0.600197	-1.6572	0.0105011	0.073778	0.0591709	1145	tags=15%, list=6%, signal=14%	AGTR1/F2RL1/REN/GJA1/TAC1
GOBP_NEGATIVE_REGULATION_OF_GLIAL_CELL_PROLIFERATION	GOBP_NEGATIVE_REGULATION_OF_GLIAL_CELL_PROLIFERATION	12	0.780677	1.71444	0.0105349	0.0739362	0.0592978	1534	tags=42%, list=8%, signal=38%	TSPO/IDH2/PTN/SKI/DICER1
GOBP_NEGATIVE_REGULATION_OF_WNT_SIGNALING_PATHWAY	GOBP_NEGATIVE_REGULATION_OF_WNT_SIGNALING_PATHWAY	197	-0.388787	-1.39285	0.0105599	0.0739603	0.0593171	2209	tags=19%, list=12%, signal=17%	DKK3/PTPRU/PSME3/PSMC5/PSMD4/CAV1/IFT80/LIMD1/APC/NOTUM/PSMD6/PSMC2/PSMA1/TSKU/APCDD1/GRB10/PSMC6/TMEM64/SOX9/BICC1/PSMD11/SNAI2/KLHL12/PSMD14/NLK/GREM1/BMP2/FZD6/NKD1/PSMD12/STK3/CTHRC1/ZNRF3/FERMT1/AXIN2/SFRP2/DKK1
GOBP_STEROID_HORMONE_SECRETION	GOBP_STEROID_HORMONE_SECRETION	20	-0.71548	-1.76116	0.0105609	0.0739603	0.0593171	1145	tags=15%, list=6%, signal=14%	AGTR1/REN/TAC1
GOBP_NUCLEOTIDE_BINDING_DOMAIN_LEUCINE_RICH_REPEAT_CONTAINING_RECEPTOR_SIGNALING_PATHWAY	GOBP_NUCLEOTIDE_BINDING_DOMAIN_LEUCINE_RICH_REPEAT_CONTAINING_RECEPTOR_SIGNALING_PATHWAY	37	0.590664	1.64781	0.0106001	0.0741555	0.0594736	3122	tags=46%, list=16%, signal=38%	PTPN22/SLC15A3/TNFAIP3/BIRC3/NFKBIA/CASP8/TLR4/RELA/RIPK2/MAP2K6/NOD2/CYLD/TAB2/UBC/UBA52/SLC15A2/UBB
GOBP_T_HELPER_17_CELL_LINEAGE_COMMITMENT	GOBP_T_HELPER_17_CELL_LINEAGE_COMMITMENT	14	0.761073	1.71195	0.0106449	0.074389	0.059661	1641	tags=50%, list=9%, signal=46%	IL23A/SLAMF6/IRF4/LY9/IL12RB1/TNFSF18/STAT3
GOBP_REGULATION_OF_PROTEIN_TARGETING_TO_MEMBRANE	GOBP_REGULATION_OF_PROTEIN_TARGETING_TO_MEMBRANE	24	0.659485	1.69683	0.0106662	0.0744585	0.0597167	2318	tags=38%, list=12%, signal=33%	ITGB2/FYN/ITGAM/CIB1/AKT2/STOM/PRNP/ANK3/SLC1A1
GOBP_REGULATION_OF_INSULIN_RECEPTOR_SIGNALING_PATHWAY	GOBP_REGULATION_OF_INSULIN_RECEPTOR_SIGNALING_PATHWAY	61	0.527493	1.62291	0.0106903	0.0745477	0.0597882	3075	tags=34%, list=16%, signal=29%	PRKCB/SERPINA12/PIP4K2A/PTPRE/CCND3/GNAI2/IL1B/PRKCD/RELA/PRKCQ/PTPN2/SOCS3/PTPN1/SRC/GPR21/OSBPL8/AHSG/ENHO/INPP5K/OGT/TSC2
GOBP_REGULATION_OF_PROTEIN_TARGETING	GOBP_REGULATION_OF_PROTEIN_TARGETING	65	0.511301	1.59699	0.0107316	0.0746173	0.059844	2318	tags=22%, list=12%, signal=19%	RAC2/ITGB2/FYN/ITGAM/BNIP3L/CIB1/LRRK2/UBE2L3/AKT2/STOM/PRNP/ANK3/UBE2J2/SLC1A1
GOBP_NLRP3_INFLAMMASOME_COMPLEX_ASSEMBLY	GOBP_NLRP3_INFLAMMASOME_COMPLEX_ASSEMBLY	13	0.765158	1.69252	0.0107345	0.0746173	0.059844	1396	tags=46%, list=7%, signal=43%	GBP5/NLRC3/AIM2/MEFV/TLR4/SIRT2
GOBP_T_CELL_EXTRAVASATION	GOBP_T_CELL_EXTRAVASATION	13	0.76479	1.69171	0.0107345	0.0746173	0.059844	2224	tags=54%, list=12%, signal=48%	ITGAL/CCL2/CCR2/ICAM1/CD99/RIPK3/CRK
GOBP_REGULATION_OF_PROTEIN_DEPHOSPHORYLATION	GOBP_REGULATION_OF_PROTEIN_DEPHOSPHORYLATION	125	0.428277	1.4556	0.0108616	0.0753791	0.060455	2937	tags=29%, list=15%, signal=25%	PTPRC/FCRL3/LILRB2/CD300A/PPP1R9B/NCKAP1L/RCAN3/GNAI2/PPP1R3B/IGFBP3/PTN/LGALS3/PRKCD/PPP1R15A/IGBP1/JAK2/PPP2R5C/PPP1R16B/RCAN2/PPP1R1A/DLC1/FAM122A/PHACTR1/PPP1R10/PPP2R1B/CD33/MFHAS1/CALM1/CALM3/RGN/PPP2R2D/PPP2R2B/PPP2R5E/TNF/SHOC2/TGFB1
GOBP_POSITIVE_REGULATION_OF_DENDRITIC_SPINE_DEVELOPMENT	GOBP_POSITIVE_REGULATION_OF_DENDRITIC_SPINE_DEVELOPMENT	39	-0.542503	-1.54739	0.0108671	0.0753791	0.060455	2101	tags=36%, list=11%, signal=32%	MTOR/FMR1/DNM1L/CAPRIN2/OPA1/EIF4G2/CAPRIN1/PAK3/LLPH/SHANK2/PPP1R9A/DBN1/DLG5/RELN
GOBP_AORTA_DEVELOPMENT	GOBP_AORTA_DEVELOPMENT	50	-0.5533	-1.66074	0.0109258	0.0757057	0.0607169	2546	tags=26%, list=13%, signal=23%	CHD7/JAG1/AP2B1/HECTD1/ADAMTS9/FOXH1/BMPR1A/LOX/ROBO2/SOX4/FKBP10/ROBO1/HEY1
GOBP_POSITIVE_REGULATION_OF_MACROPHAGE_ACTIVATION	GOBP_POSITIVE_REGULATION_OF_MACROPHAGE_ACTIVATION	24	0.657497	1.69172	0.0109688	0.0759233	0.0608914	2726	tags=50%, list=14%, signal=43%	HAMP/IL33/LBP/TLR4/HAVCR2/LRRK2/IL4R/STAP1/IL1RL1/TREM2/CCL3/CEBPA
GOBP_POSITIVE_REGULATION_OF_DIGESTIVE_SYSTEM_PROCESS	GOBP_POSITIVE_REGULATION_OF_DIGESTIVE_SYSTEM_PROCESS	12	-0.774606	-1.69692	0.010993	0.0759645	0.0609245	3	tags=17%, list=0%, signal=17%	ENPP7/TAC1
GOBP_STEROL_BIOSYNTHETIC_PROCESS	GOBP_STEROL_BIOSYNTHETIC_PROCESS	68	-0.501727	-1.57296	0.0109979	0.0759645	0.0609245	2580	tags=43%, list=14%, signal=37%	INSIG2/MBTPS2/ACAT2/LBR/FASN/PRKAA1/KPNB1/PMVK/CYB5R1/GPAM/GGPS1/NSDHL/INSIG1/FDPS/HMGCS1/ERLIN2/ACACA/DHCR7/NFYB/IDI1/TM7SF2/ACLY/SQLE/HSD17B7/HMGCR/ARV1/PRKAA2/CYP51A1/CYP7A1
GOBP_IMMUNE_RESPONSE_INHIBITING_SIGNAL_TRANSDUCTION	GOBP_IMMUNE_RESPONSE_INHIBITING_SIGNAL_TRANSDUCTION	10	0.801392	1.68069	0.0110135	0.0759922	0.0609467	2659	tags=60%, list=14%, signal=52%	LILRB2/LYN/KLRC1/LILRB1/CD33/LILRB4
GOBP_PHOSPHOLIPID_EFFLUX	GOBP_PHOSPHOLIPID_EFFLUX	13	0.764541	1.69116	0.0110479	0.0761319	0.0610587	3993	tags=77%, list=21%, signal=61%	APOA1/APOA5/APOC1/APOE/APOC2/APOC3/APOA4/APOA2/ABCA7/ABCG1
GOBP_NEGATIVE_REGULATION_OF_CELL_SUBSTRATE_ADHESION	GOBP_NEGATIVE_REGULATION_OF_CELL_SUBSTRATE_ADHESION	57	-0.50623	-1.54047	0.011057	0.0761319	0.0610587	2927	tags=37%, list=15%, signal=31%	COL1A1/CLASP2/FZD4/JAG1/FZD7/SPRY4/RASA1/TACSTD2/ANGPT2/BCAS3/THBS1/AP1AR/PHLDB2/FBLN1/SEMA3E/CASK/MMP12/POSTN/MAP4K4/EFNA5/SPOCK1
GOBP_REGULATION_OF_ESTABLISHMENT_OF_PROTEIN_LOCALIZATION_TO_CHROMOSOME	GOBP_REGULATION_OF_ESTABLISHMENT_OF_PROTEIN_LOCALIZATION_TO_CHROMOSOME	11	-0.774849	-1.65402	0.0110726	0.0761587	0.0610803	4155	tags=82%, list=22%, signal=64%	TCP1/CCT8/DKC1/TERF1/CCT2/CCT4/CCT5/CCT3/CCT6A
GOCC_COPII_COATED_ER_TO_GOLGI_TRANSPORT_VESICLE	GOCC_COPII_COATED_ER_TO_GOLGI_TRANSPORT_VESICLE	88	0.464487	1.51362	0.0111427	0.0765351	0.0613822	2004	tags=24%, list=11%, signal=21%	HLA-DRB4/HLA-DRB5/CD74/HLA-DPA1/HLA-DRB1/HLA-DPB1/HLA-DQA1/HLA-DRA/HLA-F/HLA-E/HLA-B/CTSZ/HLA-DQB1/HLA-C/CNIH3/HLA-A/TMED6/SERPINA1/HLA-H/SEC31B/B2M
GOBP_ASPARTATE_FAMILY_AMINO_ACID_BIOSYNTHETIC_PROCESS	GOBP_ASPARTATE_FAMILY_AMINO_ACID_BIOSYNTHETIC_PROCESS	21	-0.671153	-1.65336	0.0111507	0.0765351	0.0613822	3251	tags=57%, list=17%, signal=47%	MTR/MTRR/PLOD3/AASDHPPT/ASNSD1/AASS/BHMT2/PLOD2/BHMT/APIP/ENOPH1/ASNS
GOMF_NADPLUS_NUCLEOSIDASE_ACTIVITY	GOMF_NADPLUS_NUCLEOSIDASE_ACTIVITY	16	0.73954	1.72283	0.0112573	0.0771864	0.0619045	2689	tags=56%, list=14%, signal=48%	CD38/BST1/TLR2/TLR4/IL1RAP/TLR1/IL1RL1/IL18RAP/IL18R1
GOBP_CARDIAC_MUSCLE_TISSUE_DEVELOPMENT	GOBP_CARDIAC_MUSCLE_TISSUE_DEVELOPMENT	187	-0.394789	-1.41566	0.0114135	0.078149	0.0626765	2559	tags=19%, list=13%, signal=17%	FRS2/CHD7/FZD7/SORBS2/TPM1/MED1/MTOR/CACYBP/NEBL/PRKAR1A/PPP1R13L/AKAP6/ERBB4/ADAMTS9/FOXH1/ERBB3/SOX6/PTCD2/ALPK3/CXADR/BMPR1A/ZMPSTE24/TBX3/CCNB1/GJC1/GREM1/BMP2/NEB/DSP/YAP1/FGF2/GJA1/COL11A1/ANKRD1/DSG2/DKK1
GOBP_REGULATION_OF_HYDROGEN_PEROXIDE_METABOLIC_PROCESS	GOBP_REGULATION_OF_HYDROGEN_PEROXIDE_METABOLIC_PROCESS	18	0.717247	1.71784	0.0114226	0.078149	0.0626765	1064	tags=22%, list=6%, signal=21%	RAC2/FYN/SOD2/HP
GOBP_ACYLGLYCEROL_HOMEOSTASIS	GOBP_ACYLGLYCEROL_HOMEOSTASIS	35	0.587371	1.61716	0.0114335	0.078149	0.0626765	2011	tags=37%, list=11%, signal=33%	C1QTNF3/APOA1/LIPC/APOA5/ABCG5/APOC4/CETP/APOE/XBP1/APOC2/APOC3/NR1H3/ABCG8
GOMF_POLYSACCHARIDE_BINDING	GOMF_POLYSACCHARIDE_BINDING	22	0.671032	1.68863	0.0114459	0.0781519	0.0626788	1709	tags=36%, list=9%, signal=33%	HLA-DRB1/CLEC7A/HLA-DRA/PPP1R3B/CLEC4G/PTX3/VTN/PPP1R3G
GOCC_LOW_DENSITY_LIPOPROTEIN_PARTICLE	GOCC_LOW_DENSITY_LIPOPROTEIN_PARTICLE	11	0.795864	1.70986	0.0115291	0.0786381	0.0630687	1874	tags=55%, list=10%, signal=49%	APOF/APOA1/PLA2G7/APOE/APOM/APOC2
GOBP_GAMMA_DELTA_T_CELL_ACTIVATION	GOBP_GAMMA_DELTA_T_CELL_ACTIVATION	18	0.715901	1.71462	0.0115739	0.0788023	0.0632004	1753	tags=50%, list=9%, signal=45%	PTPRC/ITK/LEF1/SYK/NCKAP1L/TCF7/KLRC1/LILRB1/NOD2
GOBP_GERMINAL_CENTER_FORMATION	GOBP_GERMINAL_CENTER_FORMATION	14	0.758223	1.70554	0.0115772	0.0788023	0.0632004	3192	tags=57%, list=17%, signal=48%	TNFSF13B/KLHL6/TNFAIP3/MEF2C/CXCL13/ADA/NFKB2/BCL3
GOBP_HOMOLOGOUS_CHROMOSOME_SEGREGATION	GOBP_HOMOLOGOUS_CHROMOSOME_SEGREGATION	38	0.573938	1.6195	0.0116355	0.0791164	0.0634523	1138	tags=13%, list=6%, signal=12%	CCNE1/MAEL/FMN2/ATM/TEX11
GOBP_RESPONSE_TO_ETHANOL	GOBP_RESPONSE_TO_ETHANOL	124	0.427647	1.45558	0.0116541	0.0791612	0.0634883	1743	tags=22%, list=9%, signal=20%	S100A8/FYN/CYBB/VCAM1/RGS19/NQO1/HAMP/GSN/HPGD/ADCY7/PTK2B/CRHBP/FGFR2/ICAM1/SPI1/CD14/GSTP1/CD27/CASP8/RGS2/SOD2/GATA3/CBL/PEMT/CYP2E1/CNR1/RPS4X
GOBP_SEQUESTERING_OF_METAL_ION	GOBP_SEQUESTERING_OF_METAL_ION	15	0.72486	1.6734	0.0116688	0.0791785	0.0635021	38	tags=13%, list=0%, signal=13%	S100A8/LCN2
GOBP_INNER_EAR_MORPHOGENESIS	GOBP_INNER_EAR_MORPHOGENESIS	85	-0.463129	-1.50166	0.0117262	0.0794471	0.0637175	1347	tags=12%, list=7%, signal=11%	SOX9/INSIG1/LRIG3/FZD6/CTHRC1/PLS1/COL11A1/MYO6/DLX6/HOXA1
GOBP_CELL_MIGRATION_IN_HINDBRAIN	GOBP_CELL_MIGRATION_IN_HINDBRAIN	14	0.758018	1.70507	0.0117326	0.0794471	0.0637175	1994	tags=36%, list=10%, signal=32%	LEF1/FLNA/CTNNA2/ATP1B2/RERE
GOCC_INTRINSIC_COMPONENT_OF_ENDOPLASMIC_RETICULUM_MEMBRANE	GOCC_INTRINSIC_COMPONENT_OF_ENDOPLASMIC_RETICULUM_MEMBRANE	142	0.416381	1.44158	0.0117652	0.0795854	0.0638285	2393	tags=23%, list=13%, signal=20%	HLA-DRB4/HLA-DRB5/CD74/HLA-DPA1/HLA-DRB1/HLA-DPB1/TAP1/HLA-DQA1/DHRS9/RTN1/HLA-DRA/HLA-F/HLA-E/HLA-B/HLA-DQB1/HLA-C/TAPBP/SLC27A5/EDEM1/CALR/TAP2/HLA-A/CYP2E1/MBOAT4/HLA-H/B2M/DPM2/RCE1/TRAM2/DNAJB12/SAMD8/TAPT1/SLC27A2
GOBP_INNER_EAR_AUDITORY_RECEPTOR_CELL_DIFFERENTIATION	GOBP_INNER_EAR_AUDITORY_RECEPTOR_CELL_DIFFERENTIATION	29	-0.619792	-1.64942	0.0117797	0.0796011	0.0638411	230	tags=24%, list=1%, signal=24%	MYO7A/SLITRK6/SEC24B/JAG1/PLS1/MYO6/ESRP1
GOBP_REGULATION_OF_DEFENSE_RESPONSE_TO_VIRUS	GOBP_REGULATION_OF_DEFENSE_RESPONSE_TO_VIRUS	59	0.533648	1.62823	0.0117989	0.0796489	0.0638794	1801	tags=25%, list=9%, signal=23%	IL23A/PTPN22/FGL2/AIM2/STAT1/TNFAIP3/APOBEC3G/HTRA1/IL12RB1/TRAF3/RNF125/ZC3H12A/IL2RA/LILRB1/PYCARD
GOBP_ENDOTHELIAL_CELL_MORPHOGENESIS	GOBP_ENDOTHELIAL_CELL_MORPHOGENESIS	11	-0.769791	-1.64322	0.0119298	0.0804492	0.0645213	422	tags=64%, list=2%, signal=62%	COL15A1/CLIC4/PLOD3/HOXA13/MET/STC1/COL22A1
GOBP_NUCLEOSIDE_BISPHOSPHATE_METABOLIC_PROCESS	GOBP_NUCLEOSIDE_BISPHOSPHATE_METABOLIC_PROCESS	127	-0.423431	-1.4473	0.0119941	0.0807998	0.0648024	3403	tags=35%, list=18%, signal=29%	PDHB/ELOVL2/ACSM4/OXSM/ACSBG2/SLC35B2/PPT2/HSD17B4/PANK3/THEM5/PDK4/SLC35B3/FASN/ACBD6/PMVK/PPCS/GPAM/CBR4/AASS/BPNT1/PANK2/ACSF2/PDP1/MCCC2/SLC26A2/ELOVL5/HMGCS1/HSD17B12/DLAT/ACSL6/ACACA/ACSL4/ELOVL7/DLD/ACSM1/ACLY/ACSS2/ACSL3/HMGCR/SULT1E1/PDHX/PDK1/SULT1C4/SULT1C2
GOBP_NEGATIVE_REGULATION_OF_KINASE_ACTIVITY	GOBP_NEGATIVE_REGULATION_OF_KINASE_ACTIVITY	234	0.373808	1.37011	0.0120231	0.0808603	0.064851	2801	tags=26%, list=15%, signal=23%	PTPRC/PTPN22/GMFG/RHOH/DUSP2/IRAK3/PTPN6/PIP4K2A/LYN/PIK3IP1/FABP4/CD300A/AKT1/UCHL1/TNFAIP3/IL1B/CDKN2C/GSTP1/SLC8A1/DUSP7/PRKCD/RGS2/MVP/CIB1/DUSP10/CDKN2D/IFNG/CBL/HIPK3/BMP4/PTPN2/PRKAR2B/APOE/NR2F2/HEG1/LAX1/DUSP1/SOCS3/SFRP1/PTPN1/PYCARD/DUSP5/RB1/MIDN/CDKN2A/DUSP4/THY1/PDCD4/SMCR8/PTPRJ/RGN/PLK1/SH2B3/CBLB/CSK/LILRB4/CEBPA/PPM1F/AHSG/CORO1C/INPP5K
GOBP_TRIGLYCERIDE_METABOLIC_PROCESS	GOBP_TRIGLYCERIDE_METABOLIC_PROCESS	96	0.46292	1.533	0.0120278	0.0808603	0.064851	2002	tags=27%, list=11%, signal=24%	SERPINA12/SLC22A4/FABP1/FABP4/APOA1/FABP3/GK/CPS1/LIPC/SLC27A5/MGLL/APOA5/LPIN2/SIK1/PCK1/CETP/APOC1/CYP2E1/APOE/PIK3CG/GPX1/PLIN5/APOC2/APOC3/NR1H3/FABP5
GOCC_TIGHT_JUNCTION	GOCC_TIGHT_JUNCTION	114	-0.448388	-1.50743	0.0121331	0.0814846	0.0653517	3774	tags=37%, list=20%, signal=30%	MARVELD3/MTDH/AMOTL1/TBCD/CYTH2/RAPGEF2/MAGI1/RAB13/RAP2C/TJAP1/POF1B/PARD6G/LIN7A/PRKCI/CLDN20/CLDN15/PARD3/VAPA/PLXDC1/ECT2/TJP1/DLG1/APC/CLDN11/CCND1/PDCD6IP/EPPK1/LIN7C/CGN/OCLN/CLDN22/CLDN7/CXADR/CLDN6/CLDN18/CLDN4/WNK3/EPCAM/PARD6B/MARVELD2/GJA1/CLDN10
GOMF_SMAD_BINDING	GOMF_SMAD_BINDING	72	-0.480735	-1.50423	0.0122351	0.0820853	0.0658334	1396	tags=21%, list=7%, signal=19%	FOXH1/PARP1/TOB1/HIPK2/COL5A2/SMAD2/BMPR1A/SMAD5/BMP2/COL1A2/IPO7/ANKRD1/PMEPA1/AXIN2/HMGA2
GOBP_REGULATION_OF_NEURAL_PRECURSOR_CELL_PROLIFERATION	GOBP_REGULATION_OF_NEURAL_PRECURSOR_CELL_PROLIFERATION	76	0.47154	1.51128	0.0123078	0.0824884	0.0661567	1912	tags=21%, list=10%, signal=19%	CX3CR1/BTG2/LYN/FLNA/GNAI2/RAPGEF1/PTN/SPINT2/LRRK2/CX3CL1/TP53/SIRT2/VEGFC/MDK/LIMS2/SLC16A2
GOBP_REGULATION_OF_PROTEIN_LOCALIZATION_TO_CHROMOSOME_TELOMERIC_REGION	GOBP_REGULATION_OF_PROTEIN_LOCALIZATION_TO_CHROMOSOME_TELOMERIC_REGION	13	-0.776327	-1.75097	0.0123589	0.0827467	0.0663639	4155	tags=85%, list=22%, signal=66%	TCP1/CCT8/DKC1/TERF1/GNL3L/CCT2/CCT4/CCT5/CCT3/GNL3/CCT6A
GOBP_POSITIVE_REGULATION_OF_FATTY_ACID_METABOLIC_PROCESS	GOBP_POSITIVE_REGULATION_OF_FATTY_ACID_METABOLIC_PROCESS	36	0.605207	1.67864	0.0124583	0.0833265	0.0668289	2489	tags=42%, list=13%, signal=36%	CD74/AVPR1A/ANXA1/FABP1/APOA1/IL1B/APOA5/MLYCD/AKT2/PLIN5/APOC2/NR1H3/PPARA/TWIST1/RGN
GOBP_REGULATION_OF_MICROGLIAL_CELL_ACTIVATION	GOBP_REGULATION_OF_MICROGLIAL_CELL_ACTIVATION	16	0.736301	1.71528	0.0124826	0.0833976	0.0668859	2379	tags=62%, list=13%, signal=55%	PTPRC/ATM/LRRK2/CX3CL1/STAP1/CST7/GRN/SYT11/TREM2/CCL3
GOBP_GLYCOSYLATION	GOBP_GLYCOSYLATION	232	-0.365154	-1.33176	0.0125024	0.0833976	0.0668859	4409	tags=33%, list=23%, signal=25%	ALG10B/DOLK/TMTC4/DDOST/MUC1/ALG14/PGM3/TMTC1/TET3/KRTCAP2/GALNT10/B4GALT4/EXTL3/B4GALT6/SLC39A8/GBA2/GXYLT1/B3GNT2/TET1/ALG13/GCNT3/COG6/ALG1/B3GALNT1/UGGT1/NUS1/PIGV/PIGB/GALNT11/GCNT7/TRIP11/EXT1/AQP11/OSTC/PLOD3/SRD5A3/TMEM59/MAGT1/B4GALT3/UGGT2/B3GALT2/TMTC3/DPY19L1/C1GALT1C1/GCNT4/B3GNT5/ALG6/GBA/FKTN/ALG9/STT3B/B3GAT2/ST6GAL2/MGAT4B/B3GALNT2/EDEM3/ARFGEF1/ST3GAL6/GALNT4/RPN2/MCFD2/GFPT1/RA…
GOBP_POSITIVE_REGULATION_OF_NATURAL_KILLER_CELL_ACTIVATION	GOBP_POSITIVE_REGULATION_OF_NATURAL_KILLER_CELL_ACTIVATION	20	0.691414	1.71294	0.0125071	0.0833976	0.0668859	4065	tags=60%, list=21%, signal=47%	IL23A/HLA-F/HLA-E/TYROBP/ZBTB1/AXL/IL15/GAS6/TICAM1/BLOC1S3/AP1G1/TOX
GOBP_NEGATIVE_REGULATION_OF_AUTOPHAGY	GOBP_NEGATIVE_REGULATION_OF_AUTOPHAGY	77	0.457809	1.46802	0.0125797	0.0837964	0.0672058	3090	tags=32%, list=16%, signal=27%	PTPN22/IL10RA/HGF/TSPO/BCL2/AKT1/CHMP4A/HMOX1/HTR2B/LRRK2/TP53/SIRT2/STAT3/MTM1/ADRA1A/TAB2/TREM2/GATA4/SMCR8/DAP/NUPR1/SNRNP70/SMG1/TSC2/CHMP4B
GOBP_REGULATION_OF_DEFENSE_RESPONSE_TO_VIRUS_BY_VIRUS	GOBP_REGULATION_OF_DEFENSE_RESPONSE_TO_VIRUS_BY_VIRUS	29	0.625241	1.66545	0.0126098	0.0839116	0.0672982	1520	tags=34%, list=8%, signal=32%	FYN/CD4/HCK/DOCK2/AP1S2/LCK/CD247/AP2M1/CD8B/CD28
GOBP_BIOLOGICAL_PROCESS_INVOLVED_IN_INTERACTION_WITH_HOST	GOBP_BIOLOGICAL_PROCESS_INVOLVED_IN_INTERACTION_WITH_HOST	202	0.382882	1.38672	0.0126556	0.0840457	0.0674057	2315	tags=23%, list=12%, signal=21%	FCN1/IFITM1/CD74/CD4/HLA-DRB1/ITGB7/TRIM22/CXCR4/CD86/FCN3/SIVA1/GSN/CIITA/SERPINB9/LY6E/ICAM1/SELPLG/CCR5/CLEC4G/PTX3/TRIM31/CASP8/NCAM1/APCS/SIGLEC1/LGALS9/CR2/TRIM68/CLEC4M/CBL/SLAMF1/TRIM8/TRIM25/CD80/LGALS1/CD81/TRIM38/IFITM3/TRIM14/SRC/IFITM2/PC/AXL/TNFRSF14/PLSCR1/VPS4A/CR1
GOBP_IRON_ION_TRANSPORT	GOBP_IRON_ION_TRANSPORT	73	0.469384	1.49415	0.0126556	0.0840457	0.0674057	2747	tags=33%, list=14%, signal=28%	LCN2/HAMP/ATP6V0C/ATP6V1B2/SLC39A14/ATP6V0D1/STEAP3/IFNG/HEPH/HPX/SLC11A1/SLC25A28/ATP6AP1/CP/TFR2/HRG/B2M/FTL/ATP6V0B/ATP6V0A2/ATP6V1G1/TCIRG1/FTH1/ATP6V1F
GOBP_COLLAGEN_FIBRIL_ORGANIZATION	GOBP_COLLAGEN_FIBRIL_ORGANIZATION	48	-0.545404	-1.61377	0.0126962	0.0841385	0.0674802	2927	tags=42%, list=15%, signal=35%	COL1A1/DDR2/EXT1/PLOD3/COL5A1/NF1/PXDN/MMP11/COL11A2/COL5A2/COMP/LOXL2/GREM1/COL1A2/LOX/CYP1B1/COL11A1/COL12A1/FKBP10/SFRP2
GOBP_EPITHELIAL_CELL_APOPTOTIC_PROCESS	GOBP_EPITHELIAL_CELL_APOPTOTIC_PROCESS	97	0.461177	1.53283	0.0127105	0.0841385	0.0674802	3709	tags=46%, list=20%, signal=38%	ITGA4/CCL2/TERT/GSN/ICAM1/TNFAIP3/STK4/TEK/HMOX1/FGA/BMPR2/CFLAR/ARRB2/JAK2/GATA3/CD40/FGG/BOK/CD40LG/FGB/PIK3CG/MDK/SFRP4/PPARA/RB1/KDR/COL4A3/ZFP36/PDCD4/MAP3K5/NUPR1/TNF/RYR2/ZFP36L1/SIX3/PPARGC1A/TGFBR2/GAS6/ARF6/BID/CDH5/FGF21/PDX1/FASLG/PAK4
GOBP_REGULATION_OF_DOPAMINERGIC_NEURON_DIFFERENTIATION	GOBP_REGULATION_OF_DOPAMINERGIC_NEURON_DIFFERENTIATION	10	-0.809234	-1.68218	0.012721	0.0841385	0.0674802	50	tags=30%, list=0%, signal=30%	GSK3B/SFRP2/DKK1
GOMF_DYSTROGLYCAN_BINDING	GOMF_DYSTROGLYCAN_BINDING	10	-0.809177	-1.68206	0.012721	0.0841385	0.0674802	972	tags=30%, list=5%, signal=28%	AGRN/MAP2/AGR2
GOBP_HYDROGEN_PEROXIDE_METABOLIC_PROCESS	GOBP_HYDROGEN_PEROXIDE_METABOLIC_PROCESS	51	0.531353	1.6011	0.0127448	0.0842111	0.0675384	1064	tags=14%, list=6%, signal=13%	RAC2/FYN/CYBA/HBB/CYP1A2/SOD2/HP
GOBP_REGULATION_OF_ACTIN_FILAMENT_LENGTH	GOBP_REGULATION_OF_ACTIN_FILAMENT_LENGTH	160	0.410219	1.44241	0.0127797	0.0843562	0.0676548	1260	tags=19%, list=7%, signal=18%	CORO1A/PLEK/CCR7/GMFG/HCK/CXCL12/CAPG/HCLS1/CDC42EP3/ACTN2/COTL1/TMSB10/GSN/EVL/PTK2B/ICAM1/NCKAP1L/PREX1/FCHSD2/ELN/ARPC2/VASP/SSH2/WDR1/PFN1/PRKCD/WASF2/CTNNA2/CORO1B/SH3BP1
GOBP_MULTICELLULAR_ORGANISMAL_HOMEOSTASIS	GOBP_MULTICELLULAR_ORGANISMAL_HOMEOSTASIS	493	0.32261	1.26019	0.0127986	0.0843961	0.0676867	3211	tags=25%, list=17%, signal=21%	RAC2/CORO1A/IGHA1/LCN2/LYZ/CD38/UCP2/SASH3/PLAC8/CCR2/USH2A/CXCR4/SYK/CSF1R/JAM2/HAMP/IRF4/ESRRG/LAMA2/FABP4/CYP4A11/INPP5D/BCL2/ADCY7/PTK2B/AKR1B1/PIGR/PLCL2/TNFAIP3/PECAM1/IL1B/CFTR/AKT3/AQP1/TLR4/TRPV2/SERPINA3/IL7/PRCP/AQP3/PTH1R/JAK2/LDB1/ADCY3/IL4R/GADD45G/PRKACB/ACACB/P2RX7/PEMT/MAP2K6/CRTC3/PBLD/EPAS1/PRKAR2B/ABHD6/PASK/CPT2/ALB/STAT3/FOXO1/GNAS/CNR1/SLC11A1/ATP6AP1/NOD2/ATP1B2/GPX1/LPCAT…
GOCC_CHROMOSOME_CENTROMERIC_REGION	GOCC_CHROMOSOME_CENTROMERIC_REGION	167	-0.388305	-1.36582	0.0128517	0.0846611	0.0678993	3761	tags=35%, list=20%, signal=28%	TP53BP1/DYNC1LI1/PSEN2/STAG2/CENPP/HNRNPU/KNTC1/PPP1CC/ZW10/PMF1/ZNF207/SKA2/CLIP1/PPP2R5A/CBX5/DYNLT3/NUP43/SMC3/CLASP2/MEAF6/CKAP5/BUB1/CENPQ/RAD21/CENPK/ATRX/SMC6/DSN1/APC/PHF6/FMR1/PELI1/PPP2CB/ZNF330/MTBP/NUP160/SEH1L/NUP37/ITGB3BP/FBXO28/XPO1/PPP2CA/TPR/NUP133/ZWINT/FBXW11/DSCC1/CBX3/DCTN4/NUP107/BOD1/SS18L1/CCNB1/AHCTF1/NUDCD2/CBX1/TOP2A/SYCP3
GOBP_HIPPO_SIGNALING	GOBP_HIPPO_SIGNALING	41	-0.560391	-1.62014	0.0129979	0.0855379	0.0686025	3290	tags=46%, list=17%, signal=38%	MARK3/AMOT/AMOTL1/CASP3/NEK8/YWHAE/VGLL4/PJA2/TEAD4/TJP1/LIMD1/TEAD1/WWC2/CIT/TEAD2/SHANK2/YAP1/STK3/DLG5
GOBP_REGULATION_OF_EPITHELIAL_CELL_APOPTOTIC_PROCESS	GOBP_REGULATION_OF_EPITHELIAL_CELL_APOPTOTIC_PROCESS	75	0.471586	1.50661	0.0131661	0.0865576	0.0694203	3709	tags=45%, list=20%, signal=37%	ITGA4/CCL2/TERT/GSN/ICAM1/TNFAIP3/TEK/HMOX1/FGA/CFLAR/ARRB2/JAK2/GATA3/CD40/FGG/BOK/CD40LG/FGB/MDK/SFRP4/PPARA/KDR/ZFP36/PDCD4/NUPR1/TNF/ZFP36L1/PPARGC1A/GAS6/CDH5/FGF21/PDX1/FASLG/PAK4
GOBP_POSITIVE_REGULATION_OF_REGULATORY_T_CELL_DIFFERENTIATION	GOBP_POSITIVE_REGULATION_OF_REGULATORY_T_CELL_DIFFERENTIATION	15	0.720822	1.66407	0.0131941	0.0865819	0.0694398	2659	tags=53%, list=14%, signal=46%	LILRB2/HLA-DRB1/HLA-DRA/LGALS9/DUSP10/IFNG/CR1/LILRB4
GOBP_PROTEIN_DEPHOSPHORYLATION	GOBP_PROTEIN_DEPHOSPHORYLATION	294	0.358917	1.33565	0.0131962	0.0865819	0.0694398	2862	tags=25%, list=15%, signal=21%	PTPRC/PTPN22/FCRL3/LILRB2/DUSP2/LCK/PTPN6/PPP3CC/PTPRE/CD300A/PPM1M/CDC14A/BCL2/CDC25B/PPP1R9B/NCKAP1L/RCAN3/GNAI2/DAPP1/PPP1R3B/IGFBP3/PTPN18/MYH3/PTN/MTMR7/SSH2/DUSP7/LGALS3/PRKCD/PTPN4/PPP1R15A/IGBP1/JAK2/PPP2R5C/LRRK2/CTDSP1/DUSP10/PPP1R16B/CDKN3/RCAN2/PPP1R1A/PTPN2/DLC1/FAM122A/DUSP1/MTM1/PHACTR1/PPP1R10/PTPN1/PPP2R1B/PPP4C/CD33/MFHAS1/MTMR14/DUSP5/CALM1/PTP4A2/LRRK1/DUSP4/CALM3/PTPRS/PTPRJ/…
GOBP_APPENDAGE_MORPHOGENESIS	GOBP_APPENDAGE_MORPHOGENESIS	128	-0.416219	-1.4251	0.0133286	0.0873628	0.0700661	2721	tags=20%, list=14%, signal=18%	EXT1/CTNNB1/INTU/SALL4/CHD7/LRP5/ATRX/MED1/TULP3/CRABP2/SOX9/DYNC2H1/PCSK5/HDAC2/BMPR1A/TBX3/GREM1/RSPO2/FZD6/HOXA13/SOX4/SFRP2/SEMA3C/DLX6/FREM2/FRAS1
GOBP_POSITIVE_REGULATION_OF_T_HELPER_CELL_DIFFERENTIATION	GOBP_POSITIVE_REGULATION_OF_T_HELPER_CELL_DIFFERENTIATION	22	0.665305	1.67422	0.0134167	0.0878524	0.0704588	1913	tags=45%, list=10%, signal=41%	IL23A/ANXA1/CD86/NFKBIZ/MALT1/IL12RB1/RIPK2/IL4R/CD80/CCL19
GOMF_PROTEIN_TYROSINE_PHOSPHATASE_ACTIVITY	GOMF_PROTEIN_TYROSINE_PHOSPHATASE_ACTIVITY	95	0.46933	1.55359	0.0134315	0.0878616	0.0704661	2514	tags=26%, list=13%, signal=23%	PTPRC/PTPN22/DUSP2/PTPN6/PTPRE/CDC14A/CDC25B/PTPN18/MTMR7/SSH2/DUSP7/PTPN4/DUSP10/CDKN3/PTPN2/DUSP1/MTM1/PTPN1/MTMR14/DUSP5/PTP4A2/DUSP4/PTPRS/PTPRJ/MTMR3
GOBP_OSSIFICATION	GOBP_OSSIFICATION	364	-0.335019	-1.28102	0.0134898	0.0881548	0.0707013	1655	tags=12%, list=9%, signal=12%	DMP1/MMP16/TMEM64/ANO6/SBDS/SOX9/CLTC/SLC26A2/TOB1/TNC/TUFT1/MINPP1/PTK2/ACVR2B/BCAP29/COL5A2/COMP/SNAI2/BMPR1A/ZMPSTE24/IL6/DSPP/SMAD5/PTHLH/GREM1/GTPBP4/BMP2/RSPO2/CCDC47/COL1A2/YAP1/CDK6/SORT1/LOX/CTHRC1/BAMBI/COL11A1/PEX7/STC1/AXIN2/SFRP2/PENK/CALCA/TAC1/DKK1
GOBP_REGULATION_OF_INTRACELLULAR_PROTEIN_TRANSPORT	GOBP_REGULATION_OF_INTRACELLULAR_PROTEIN_TRANSPORT	220	0.372294	1.35663	0.0135269	0.0883091	0.070825	1775	tags=17%, list=9%, signal=15%	RAC2/ITGB2/FYN/LCP1/GZMB/HCLS1/ITGAM/PPP3CC/BCL2/FLNA/IL1B/ZDHHC2/OAZ1/BNIP3L/UBE2J1/CASP8/EDEM1/PRKCD/JAK2/IFI27/CIB1/LRRK2/UBE2L3/TP53/IFNG/VAMP2/AKT2/OAZ2/ZC3H12A/BMP4/MDFIC/PMAIP1/CD81/ANP32B/STOM/PRNP/PTPN1
GOMF_RIBOSOME_BINDING	GOMF_RIBOSOME_BINDING	48	-0.543112	-1.60699	0.0135668	0.0884815	0.0709633	4249	tags=50%, list=22%, signal=39%	SRP68/EIF2A/GEMIN5/HSPA5/YTHDF3/EIF2S1/RICTOR/EIF6/ETF1/YTHDF1/NAA15/SEC61A2/OLA1/MTOR/FMR1/TACO1/SPCS1/MRPS27/SRP19/SBDS/RPN2/CPEB4/EIF5A2/PRMT3
GOBP_POSITIVE_REGULATION_OF_INTRACELLULAR_TRANSPORT	GOBP_POSITIVE_REGULATION_OF_INTRACELLULAR_TRANSPORT	193	0.386022	1.38017	0.0136517	0.0889465	0.0713363	1726	tags=17%, list=9%, signal=16%	RAC2/ITGB2/FYN/GZMB/HCLS1/ITGAM/ACTN2/PPP3CC/BCL2/FLNA/MSN/IL1B/ZDHHC2/OAZ1/EHD1/CASP8/EDEM1/PRKCD/JAK2/EZR/CIB1/UBE2L3/TP53/IFNG/VAMP2/AKT2/OAZ2/ZC3H12A/PMAIP1/CD81/ANP32B/STOM/PRNP
GOBP_POSITIVE_REGULATION_OF_INFLAMMATORY_RESPONSE_TO_ANTIGENIC_STIMULUS	GOBP_POSITIVE_REGULATION_OF_INFLAMMATORY_RESPONSE_TO_ANTIGENIC_STIMULUS	11	0.786715	1.6902	0.0136956	0.0890861	0.0714482	2779	tags=73%, list=15%, signal=62%	CCR7/HLA-E/BTK/CD28/CD81/CNR1/C3/TNF
GOMF_SODIUM_ION_TRANSMEMBRANE_TRANSPORTER_ACTIVITY	GOMF_SODIUM_ION_TRANSMEMBRANE_TRANSPORTER_ACTIVITY	136	-0.410138	-1.41587	0.0137003	0.0890861	0.0714482	3911	tags=28%, list=21%, signal=22%	CACNA1H/SLC5A9/SLC6A4/SLC13A4/SLC9A6/GRIK1/SLC18A2/SLC41A1/SLC6A9/SLC23A2/SLC22A3/SLC38A2/SLC23A1/SLC8A3/HCN3/KCNK1/SLC5A3/ATP1A1/SLC5A6/SLC4A8/SCN8A/SLC20A2/SLC6A1/SLC3A2/SLC10A5/SCNN1A/SLC9A3/SLC28A1/SLC1A2/SLC12A1/SLC4A4/SLC12A2/SLC6A11/SLC6A2/SLC24A5/SLC13A3/SLC34A2/SCN9A
GOCC_ENDOSOME_MEMBRANE	GOCC_ENDOSOME_MEMBRANE	454	0.320566	1.23984	0.0137286	0.0891815	0.0715247	2341	tags=20%, list=12%, signal=18%	HLA-DRB4/HLA-DMB/GIMAP5/HLA-DRB5/HLA-DPA1/HLA-DMA/ACAP1/HLA-DOA/HLA-DRB1/HLA-DPB1/ANXA1/HLA-DOB/CD68/HLA-DQA1/TMEM163/STEAP4/HLA-DRA/CD1C/OCA2/TLR8/RAB27A/MYD88/HLA-F/MCOLN2/MREG/LAMP3/SLC15A3/CD1A/HLA-E/ATP6V0C/HLA-B/GPNMB/NTRK2/CD14/CHMP4A/HLA-DQB1/CFTR/CD1B/ZDHHC2/HLA-C/RAB8B/RAB31/SLC39A14/ATP6V0D1/EHD1/ATP11B/TLR4/AP2M1/STEAP3/RAP2B/LITAF/CD8B/INPP4A/SUN2/IRAK4/SLA2/HLA-A/BOK/GOLIM4/CHMP7/FI…
GOBP_RNA_MODIFICATION	GOBP_RNA_MODIFICATION	137	-0.408098	-1.41365	0.0137926	0.0895081	0.0717866	4855	tags=45%, list=26%, signal=34%	MTO1/QTRT1/APOBEC1/THUMPD3/RBM47/TPRKB/TRMT5/MOCS3/MEPCE/TGS1/ELP4/DTWD1/TRMT112/AARS2/ADAT2/TFB1M/LARP7/PUS7L/KTI12/FTSJ3/THUMPD2/LCMT2/CDK5RAP1/NSUN5/TRUB1/NSUN4/METTL2A/GAR1/METTL14/DKC1/CTU2/NOP2/OSGEPL1/NAT10/TRIT1/DUS1L/APOBEC3B/METTL2B/NSUN5P2/RPUSD4/CBLL1/TYW3/NHP2/TRMT12/EMG1/METTL1/VIRMA/SSB/DTWD2/METTL6/TRMT11/TRMT6/ELP2/NSUN2/BAG4/TRMT61B/METTL5/TFB2M/TYW1/DUS4L/PUS7/TARBP1
GOBP_REGULATION_OF_CELLULAR_RESPONSE_TO_HEAT	GOBP_REGULATION_OF_CELLULAR_RESPONSE_TO_HEAT	74	-0.481466	-1.5031	0.013826	0.089571	0.0718371	3412	tags=39%, list=18%, signal=32%	CHORDC1/RAE1/HSPA1B/YWHAE/ATR/NUP43/HSPB8/PTGES3/NUP153/DNAJC7/GSK3B/FKBP4/MTOR/NUP35/DNAJC2/NUP160/HSP90AB1/DNAJB6/SEH1L/NUP37/TPR/NUP133/POM121/NUP107/RANBP2/BAG4/NUP205/NUP155/BAG2
GOBP_UROGENITAL_SYSTEM_DEVELOPMENT	GOBP_UROGENITAL_SYSTEM_DEVELOPMENT	312	-0.342053	-1.28594	0.0138339	0.089571	0.0718371	3316	tags=25%, list=17%, signal=21%	MME/CAT/WNT5A/KCNJ8/CA2/VEGFA/PLAG1/NLE1/PODXL/CEP290/SIX4/WT1/CYP7B1/EXT1/LGR4/AQP11/IFT20/ENPEP/CTNNB1/FRS2/MYO1E/MYC/KLF15/JAG1/CRLF1/WDR77/TACSTD2/NF1/GCNT4/AP2B1/NID1/DLG1/ANGPT2/NUP160/IFT27/KIF26B/MTSS1/PDGFA/LIF/ACTA2/SOX9/BICC1/PPAT/NUP133/AGTR1/SMARCC1/DYNC2H1/SULF1/TNC/PCSK5/PTCD2/PDGFD/SMAD2/COL4A1/NUP107/ZMPSTE24/SMAD5/GREM1/BMP2/GCNT1/ANGPT1/HAS2/YAP1/HOXA13/TIPARP/PROM1/REN/FGF2/LG…
GOBP_NEGATIVE_REGULATION_OF_CYTOKINE_PRODUCTION_INVOLVED_IN_INFLAMMATORY_RESPONSE	GOBP_NEGATIVE_REGULATION_OF_CYTOKINE_PRODUCTION_INVOLVED_IN_INFLAMMATORY_RESPONSE	18	0.707889	1.69543	0.0138433	0.089571	0.0718371	3067	tags=56%, list=16%, signal=47%	NLRC3/MEFV/ADCY7/ZC3H12A/PYCARD/PPARA/SIRPA/PDCD4/LILRB4/CUEDC2
GOBP_FATTY_ACYL_COA_BIOSYNTHETIC_PROCESS	GOBP_FATTY_ACYL_COA_BIOSYNTHETIC_PROCESS	30	-0.581007	-1.56141	0.0138767	0.0896985	0.0719393	3974	tags=53%, list=21%, signal=42%	TECR/HACD1/SCD/ELOVL2/ACSBG2/PPT2/FASN/CBR4/ELOVL5/HSD17B12/ACSL6/ACACA/ACSL4/ELOVL7/ACLY/ACSL3
GOBP_SISTER_CHROMATID_SEGREGATION	GOBP_SISTER_CHROMATID_SEGREGATION	172	-0.385522	-1.36099	0.0139195	0.0898867	0.0720903	3810	tags=31%, list=20%, signal=25%	CHMP2B/DYNC1LI1/STAG2/ESCO1/TUBG2/HNRNPU/PTTG3P/CHMP4C/KNTC1/RAD51C/ZW10/SFPQ/ZNF207/VPS4B/TRIP13/ANAPC4/EML4/SMC3/ANAPC7/STAG3L1/CTNNB1/BUB1/HECW2/POGZ/RAD21/CENPK/KPNB1/ATRX/IK/DSN1/STAG3L2/APC/CHMP5/RRS1/HORMAD1/STAG3L3/CDC27/SEH1L/STAG3L4/TPR/NCAPG2/ZWINT/NSMCE2/TUBG1/DSCC1/DDX11/CDC23/BOD1/RIOK2/CCNB1/TOP2A/MAD2L1BP/CDC6/AXIN2
GOBP_IRE1_MEDIATED_UNFOLDED_PROTEIN_RESPONSE	GOBP_IRE1_MEDIATED_UNFOLDED_PROTEIN_RESPONSE	60	-0.501286	-1.54438	0.013948	0.0899817	0.0721664	2816	tags=37%, list=15%, signal=31%	SRPRB/HYOU1/EXTL3/HSPA5/SYVN1/KLHDC3/DDRGK1/SSR1/SEC31A/PDIA6/PREB/GOSR2/DNAJB11/GFPT1/TMEM33/DDX11/EXTL2/DNAJB9/WIPI1/COPS5/KDELR3/AGR2
GOBP_NEGATIVE_REGULATION_OF_CALCIUM_MEDIATED_SIGNALING	GOBP_NEGATIVE_REGULATION_OF_CALCIUM_MEDIATED_SIGNALING	18	0.706996	1.69329	0.0139946	0.0901934	0.0723362	1865	tags=44%, list=10%, signal=40%	PLEK/CD22/ITPR1/ATP2B4/SLA2/DYRK2/PRNP/TBC1D10C
GOBP_REGULATION_OF_CELL_CELL_ADHESION_MEDIATED_BY_INTEGRIN	GOBP_REGULATION_OF_CELL_CELL_ADHESION_MEDIATED_BY_INTEGRIN	10	0.791793	1.66056	0.0140517	0.0904725	0.0725601	836	tags=50%, list=4%, signal=48%	CCL5/SKAP1/CD3E/FERMT3/CXCL13
GOBP_NEGATIVE_REGULATION_OF_EXTRINSIC_APOPTOTIC_SIGNALING_PATHWAY_VIA_DEATH_DOMAIN_RECEPTORS	GOBP_NEGATIVE_REGULATION_OF_EXTRINSIC_APOPTOTIC_SIGNALING_PATHWAY_VIA_DEATH_DOMAIN_RECEPTORS	39	0.545901	1.54735	0.014093	0.0906494	0.0727019	3944	tags=59%, list=21%, signal=47%	FAS/TNFSF10/HGF/BMP5/ICAM1/TNFAIP3/HMOX1/FGA/CASP8/CFLAR/FGG/FGB/TRADD/GPX1/RAF1/ARHGEF2/BRCA1/TNFRSF10B/RIPK1/FASLG/HMGB2/TNFRSF10A/ITPRIP
GOBP_REGULATION_OF_MITOCHONDRIAL_FUSION	GOBP_REGULATION_OF_MITOCHONDRIAL_FUSION	12	-0.765147	-1.6762	0.0141543	0.0909544	0.0729466	3366	tags=58%, list=18%, signal=48%	BNIP3/VAT1/ZDHHC6/DNM1L/OPA1/TFRC/OMA1
GOMF_MISMATCH_REPAIR_COMPLEX_BINDING	GOMF_MISMATCH_REPAIR_COMPLEX_BINDING	11	-0.763377	-1.62953	0.0142157	0.0912592	0.073191	3796	tags=64%, list=20%, signal=51%	WRN/MLH1/ATR/MSH6/MCM8/PCNA/MSH2
GOBP_ACTIVATION_OF_GTPASE_ACTIVITY	GOBP_ACTIVATION_OF_GTPASE_ACTIVITY	101	0.437497	1.46788	0.0144238	0.0925047	0.0741899	2320	tags=25%, list=12%, signal=22%	GPR65/CCR7/ARHGAP25/RASGRP1/TIAM1/RASGRF1/PTK2B/ABR/RHOG/CXCL13/RAPGEF1/RABGAP1L/RAP1GAP2/TBC1D9/GMIP/AKT2/RAP1GAP/TBC1D10C/CCL21/ARHGAP24/RCC2/SIPA1/TBC1D2B/CRK/TBC1D10B
GOBP_POSITIVE_REGULATION_OF_MONOCYTE_DIFFERENTIATION	GOBP_POSITIVE_REGULATION_OF_MONOCYTE_DIFFERENTIATION	10	0.790341	1.65752	0.0145074	0.0929497	0.0745468	231	tags=30%, list=1%, signal=30%	CD74/CD4/HLA-DRB1
GOBP_GOLGI_TO_PLASMA_MEMBRANE_TRANSPORT	GOBP_GOLGI_TO_PLASMA_MEMBRANE_TRANSPORT	56	-0.525281	-1.59318	0.0145541	0.0931577	0.0747137	3261	tags=36%, list=17%, signal=30%	RAB10/GOLGA7/EXOC2/CLN3/CCDC93/BBS1/NSF/LYPLA1/BBS2/STXBP6/EXOC6/GOLPH3L/PREPL/ARFGEF2/GOLGA4/BLZF1/CNST/EXOC8/ACSL3/STEAP2
GOBP_ARTERY_DEVELOPMENT	GOBP_ARTERY_DEVELOPMENT	84	-0.468154	-1.51581	0.0145825	0.0932481	0.0747862	2546	tags=23%, list=13%, signal=20%	CHD7/JAG1/NF1/AP2B1/HECTD1/ADAMTS9/FOXH1/FOLR1/ACVR2B/COMP/BMPR1A/HOXA13/LOX/ROBO2/SOX4/FKBP10/ROBO1/HEY1/HOXA1
GOBP_GRANULOCYTE_DIFFERENTIATION	GOBP_GRANULOCYTE_DIFFERENTIATION	33	0.584391	1.5909	0.0146521	0.0936022	0.0750701	658	tags=18%, list=3%, signal=18%	EVI2B/LEF1/HCLS1/C1QC/INPP5D/SPI1
GOBP_POSITIVE_CHEMOTAXIS	GOBP_POSITIVE_CHEMOTAXIS	58	0.5111	1.5601	0.0146831	0.0937082	0.0751552	3360	tags=48%, list=18%, signal=40%	CORO1A/CCL5/CXCL10/CXCL12/COLEC10/HGF/CCR4/IL16/GPNMB/LGALS3/LRP1/CX3CL1/VEGFB/BMP4/VEGFC/S1PR1/KDR/CCL3/PTPRJ/MIF/AGER/TSC2/HMGB1/ALKBH1/NTF3/SMAD3/FPR2/PGF
GOBP_NK_T_CELL_ACTIVATION	GOBP_NK_T_CELL_ACTIVATION	11	0.78297	1.68215	0.0147789	0.0942279	0.075572	484	tags=27%, list=3%, signal=27%	IL23A/ELF4/CD300A
GOBP_ACTIVATION_OF_PROTEIN_KINASE_ACTIVITY	GOBP_ACTIVATION_OF_PROTEIN_KINASE_ACTIVITY	313	0.35745	1.33852	0.0148713	0.0947249	0.0759706	2290	tags=22%, list=12%, signal=19%	PTPRC/CCL5/IL23A/SAA1/CD74/CXCR4/SYK/CD86/HGF/MLKL/CD300A/GPRC5B/ADCY7/PTK2B/FPR1/C5AR1/AKT1/STK4/NCKAP1L/IL1B/MAP3K3/ANG/RAPGEF1/DUSP7/MAP4K1/MALT1/GADD45B/TLR4/PRKCD/ADRA2A/JAK2/RIPK2/ADCY3/LRRK2/GADD45G/PRKACB/LPAR1/AVPI1/MAP2K6/CD40LG/ARAF/BMP4/MDFIC/PRKAR2B/CD81/SLC11A1/S1PR2/GHR/NOD2/PTPN1/MAPKAPK3/KSR1/RPLP1/SRC/F2R/CCL19/ARRB1/DUSP5/TGFB3/DBNL/RIPK3/TAB2/OSBPL8/CRK/TNIK/MAP3K8/MAPKAPK2/AD…
GOMF_NADPH_BINDING	GOMF_NADPH_BINDING	13	-0.769898	-1.73647	0.0149041	0.0948416	0.0760642	2975	tags=54%, list=16%, signal=45%	MTRR/LBR/CBR4/TP53I3/CRYZ/DHFR/HMGCR
GOCC_MICROBODY	GOCC_MICROBODY	119	-0.427757	-1.44627	0.0149906	0.0952993	0.0764312	3354	tags=35%, list=18%, signal=29%	SYT7/CAT/ISOC1/IDI2/SCP2/ALDH3A2/PEX19/PEX5/HSD17B4/ATAD1/PXMP4/PMVK/PEX6/TYSND1/ACBD5/DNM1L/PEX3/IMPDH2/AMACR/PECR/PNPLA8/PEX2/IDE/GNPAT/TRIM37/PEX1/NUDT12/IDH1/TMEM135/ACSL6/ACSL4/NOS2/PEX12/TTC1/AGPS/FNDC5/IDI1/ACSL3/HMGCR/CRYM/PEX11B/PEX7
GOBP_REGULATION_OF_PHOSPHOPROTEIN_PHOSPHATASE_ACTIVITY	GOBP_REGULATION_OF_PHOSPHOPROTEIN_PHOSPHATASE_ACTIVITY	104	0.428047	1.43689	0.0150231	0.0953299	0.0764558	2858	tags=30%, list=15%, signal=25%	PTPRC/FCRL3/CD300A/PPP1R9B/NCKAP1L/RCAN3/GNAI2/PPP1R3B/IGFBP3/PTN/LGALS3/PPP1R15A/IGBP1/JAK2/PPP2R5C/PPP1R16B/RCAN2/PPP1R1A/FAM122A/PHACTR1/PPP1R10/PPP2R1B/CD33/CALM1/CALM3/RGN/PPP2R2D/PPP2R2B/PPP2R5E/TNF/SHOC2
GOCC_CHROMOSOME_TELOMERIC_REGION	GOCC_CHROMOSOME_TELOMERIC_REGION	117	-0.428295	-1.45184	0.0150485	0.0953299	0.0764558	3817	tags=38%, list=20%, signal=30%	XRCC6/WRN/TP53BP1/HNRNPA2B1/RPA4/GAR1/PPP1CC/WRNIP1/DHX36/EID3/TNKS2/DNA2/ATR/CBX5/TERF1/NAT10/PTGES3/PPP1CB/MCM7/DDB1/POT1/PURA/RIF1/ATRX/SMC6/HAT1/RAD51AP1/NHP2/CDK1/RAD17/PARP1/SSB/DPY30/CDC73/THOC7/NSMCE2/RAD50/THOC2/CBX3/CBX1/PCNA/PRKDC/MSH2/MCM4
GOBP_REGULATION_OF_CD8_POSITIVE_ALPHA_BETA_T_CELL_ACTIVATION	GOBP_REGULATION_OF_CD8_POSITIVE_ALPHA_BETA_T_CELL_ACTIVATION	18	0.703698	1.68539	0.0150536	0.0953299	0.0764558	2659	tags=50%, list=14%, signal=43%	PTPN22/RUNX3/IRF1/HLA-E/NCKAP1L/HLA-A/LILRB1/CRTAM/LILRB4
GOMF_PATTERN_RECOGNITION_RECEPTOR_ACTIVITY	GOMF_PATTERN_RECOGNITION_RECEPTOR_ACTIVITY	23	0.661314	1.67952	0.0150536	0.0953299	0.0764558	2062	tags=52%, list=11%, signal=47%	FCN1/CLEC7A/MARCO/PTAFR/TLR8/CLEC4E/CD14/TLR2/TLR4/TLR7/NOD2/LY96
GOBP_NEGATIVE_REGULATION_OF_PROTEIN_SERINE_THREONINE_KINASE_ACTIVITY	GOBP_NEGATIVE_REGULATION_OF_PROTEIN_SERINE_THREONINE_KINASE_ACTIVITY	132	0.412893	1.41709	0.0150823	0.0954191	0.0765274	2555	tags=29%, list=13%, signal=25%	PTPN22/DUSP2/IRAK3/PTPN6/LYN/CD300A/AKT1/UCHL1/TNFAIP3/IL1B/CDKN2C/GSTP1/SLC8A1/DUSP7/PRKCD/RGS2/CIB1/DUSP10/CDKN2D/HIPK3/BMP4/PRKAR2B/APOE/NR2F2/HEG1/LAX1/DUSP1/SFRP1/PTPN1/PYCARD/DUSP5/RB1/CDKN2A/DUSP4/PDCD4/PTPRJ/PLK1/SH2B3
GOBP_POSITIVE_REGULATION_OF_SMOOTH_MUSCLE_CELL_PROLIFERATION	GOBP_POSITIVE_REGULATION_OF_SMOOTH_MUSCLE_CELL_PROLIFERATION	80	0.465109	1.49482	0.0151105	0.0955054	0.0765965	2856	tags=38%, list=15%, signal=32%	CCL5/MMP9/AIF1/PTAFR/TERT/HPGD/MYD88/STAT1/FGFR2/AKR1B1/AKT1/GNAI2/SERPINF2/HMOX1/JAK2/IRAK4/CX3CL1/BMP4/EREG/MMP2/DNMT1/IGFBP5/S1PR1/TGM2/JUN/MAP3K5/HDAC4/TNF/ERN1/CALCRL
GOBP_PROTEIN_PHOSPHOPANTETHEINYLATION	GOBP_PROTEIN_PHOSPHOPANTETHEINYLATION	276	-0.351828	-1.31539	0.0151274	0.0955199	0.0766082	4866	tags=36%, list=26%, signal=27%	USP2/HEATR4/OTUD4/GALNT3/B3GALT6/BRCC3/UBE2E1/USP48/OTUD3/RBX1/MOCS3/TPST1/ZDHHC14/TGM3/GLUL/USP1/TTLL4/TMX3/USP5/CRELD1/YKT6/KAT2A/GALNT10/BAP1/YOD1/SAE1/USP42/CRELD2/ZDHHC17/USP21/UBE2E2/ESCO1/ALG13/GCNT3/ZDHHC4/USP30/PTAR1/LYPLA2/ATG7/USP22/LIPT1/USP54/USP32/GOLGA7/CHM/PGGT1B/GALNT11/PPT2/USP38/USP8/PLOD3/TTLL2/EIF3H/FN3K/USP36/NAE1/PDIA6/USP14/C1GALT1C1/GCNT4/USP45/VCPIP1/ZDHHC6/OTUD7B/USP33/…
GOBP_REGULATION_OF_FATTY_ACID_TRANSPORT	GOBP_REGULATION_OF_FATTY_ACID_TRANSPORT	45	0.553248	1.61965	0.0151542	0.0955968	0.0766698	2132	tags=27%, list=11%, signal=24%	AVPR1A/SYK/CYP4A11/FABP3/AKT1/ARL6IP5/IL1B/MAP2K6/AKT2/ATP1A2/PPARA/PLA2G10
GOBP_T_HELPER_CELL_LINEAGE_COMMITMENT	GOBP_T_HELPER_CELL_LINEAGE_COMMITMENT	17	0.732654	1.72261	0.0152709	0.0962404	0.077186	1641	tags=47%, list=9%, signal=43%	IL23A/SLAMF6/IRF4/SPN/LY9/IL12RB1/TNFSF18/STAT3
GOBP_NEGATIVE_REGULATION_OF_PHOSPHORUS_METABOLIC_PROCESS	GOBP_NEGATIVE_REGULATION_OF_PHOSPHORUS_METABOLIC_PROCESS	454	0.318701	1.23263	0.0153157	0.0964301	0.0773382	2801	tags=26%, list=15%, signal=23%	PTPRC/PTPN22/PLEK/GMFG/RASSF2/RHOH/SAMSN1/DUSP2/IRAK3/FBP1/PTPN6/PIP4K2A/HGF/LYN/PIK3IP1/FABP4/CD300A/SEMA4D/AKT1/UCHL1/TNFAIP3/PPP1R9B/NCKAP1L/GNAI2/IL1B/CDKN2C/GSTP1/SLC8A1/IGFBP3/PTN/DUSP7/LGALS3/PRKCD/NLRP12/RGS2/MVP/ARRB2/DYNLL1/PPP1R15A/DNAJC15/CIB1/MICAL1/LRRK2/DUSP10/CDKN2D/TP53/IFNG/PPP1R16B/CBL/FARP1/STAP1/SIRT2/HIPK3/ZC3H12A/ENG/BMP4/TTC36/PPP1R1A/APOC1/PBLD/PTPN2/FAM122A/PRKAR2B/APOE/…
GOBP_NEGATIVE_REGULATION_OF_MULTI_ORGANISM_PROCESS	GOBP_NEGATIVE_REGULATION_OF_MULTI_ORGANISM_PROCESS	18	0.702481	1.68247	0.0153562	0.0965414	0.0774274	1055	tags=28%, list=6%, signal=26%	CARD16/TNFAIP3/LILRA2/CARD8/BST2
GOBP_LOCOMOTORY_EXPLORATION_BEHAVIOR	GOBP_LOCOMOTORY_EXPLORATION_BEHAVIOR	11	-0.760117	-1.62257	0.0153629	0.0965414	0.0774274	236	tags=27%, list=1%, signal=27%	GAD1/DPP4/PENK
GOCC_NEURON_PROJECTION_CYTOPLASM	GOCC_NEURON_PROJECTION_CYTOPLASM	81	-0.465583	-1.48742	0.0153789	0.0965497	0.0774341	2005	tags=21%, list=11%, signal=19%	PURA/KIF3B/FMR1/OPA1/AP3S1/SPAST/WLS/KIF1B/KIF5B/AP3B1/UHMK1/FBXW11/RAB27B/WASF1/SYBU/MAP2/KIF3A
GOCC_DESMOSOME	GOCC_DESMOSOME	24	-0.659816	-1.68395	0.0154009	0.0965949	0.0774703	3212	tags=38%, list=17%, signal=31%	POF1B/PPL/PNN/JUP/PERP/PKP4/DSP/DSC2/DSG2
GOBP_PROTEIN_TRANSMEMBRANE_IMPORT_INTO_INTRACELLULAR_ORGANELLE	GOBP_PROTEIN_TRANSMEMBRANE_IMPORT_INTO_INTRACELLULAR_ORGANELLE	31	-0.603029	-1.6246	0.0154519	0.0967788	0.0776179	3206	tags=48%, list=17%, signal=40%	PEX13/AIFM1/PEX5L/CHCHD4/PEX5/PEX6/HSPD1/PEX2/PEX1/TIMM17A/TOMM40L/PEX12/TOMM20/GRPEL2/PEX7
GOCC_CELL_SUBSTRATE_JUNCTION	GOCC_CELL_SUBSTRATE_JUNCTION	404	0.333479	1.27684	0.0154598	0.0967788	0.0776179	3225	tags=31%, list=17%, signal=26%	RAC2/PTPRC/ITGB2/LCP1/ITGA4/FERMT3/ITGBL1/HCK/CD44/TNFSF13B/ANXA1/LPXN/APBB1IP/ITGB7/SLA/ACTN2/PARVG/VIM/GSN/EVL/IQGAP1/PTK2B/ICAM1/FLNA/RPS15/ATP6V0C/CNN2/IL16/MSN/TEK/RPS9/RHOG/ARPC2/VASP/PFN1/RPS19/RPS29/CALR/SH3KBP1/LAP3/RRAS/RPL18/CORO1B/JAK2/RPS11/SLC9A3R2/EZR/PLAUR/KLF11/SYNPO2/LRP1/NFASC/CBL/SNTB2/ZYX/TNS1/SORBS3/ANXA5/TLN1/CD99/ENG/RPS5/RPL13A/DLC1/RPL7A/CD81/CAP1/RPS4X/NEXN/PXN/RPLP2/RP…
GOBP_AORTA_MORPHOGENESIS	GOBP_AORTA_MORPHOGENESIS	29	-0.608867	-1.62034	0.0155419	0.0971998	0.0779554	2546	tags=28%, list=13%, signal=24%	CHD7/JAG1/ADAMTS9/FOXH1/BMPR1A/SOX4/FKBP10/HEY1
GOBP_STARTLE_RESPONSE	GOBP_STARTLE_RESPONSE	21	-0.654423	-1.61215	0.0155842	0.0973718	0.0780934	302	tags=10%, list=2%, signal=9%	GLRB/PENK
GOBP_AXO_DENDRITIC_TRANSPORT	GOBP_AXO_DENDRITIC_TRANSPORT	64	-0.50213	-1.567	0.01565	0.0976896	0.0783483	4923	tags=38%, list=26%, signal=28%	ARL8B/SNAPIN/KLC3/APBA1/AP3M2/BLOC1S2/SPG11/HNRNPU/SFPQ/RAB21/PURA/KIF3B/OPA1/AP3S1/SPAST/KIF1B/KIF5B/AP3B1/FBXW11/RAB27B/WASF1/SYBU/MAP2/KIF3A
GOBP_RETROGRADE_VESICLE_MEDIATED_TRANSPORT_GOLGI_TO_ENDOPLASMIC_RETICULUM	GOBP_RETROGRADE_VESICLE_MEDIATED_TRANSPORT_GOLGI_TO_ENDOPLASMIC_RETICULUM	82	-0.468623	-1.50436	0.015756	0.0981661	0.0787304	4250	tags=38%, list=22%, signal=29%	KIF18A/KDELR2/ARCN1/TMED2/BNIP1/LMAN2/PITPNB/BET1L/ZW10/SEC22B/ERGIC1/ERGIC3/TMED9/ARFGAP3/COPA/TMED3/RAB1A/TMED7/KIF3B/ARF4/KIFAP3/NSF/ATP9A/SCFD1/COPB1/GOLPH3L/COPG2/KDELR3/KIF3A/RINT1/NBAS
GOBP_POSITIVE_REGULATION_OF_DEPHOSPHORYLATION	GOBP_POSITIVE_REGULATION_OF_DEPHOSPHORYLATION	55	0.507338	1.5487	0.0157563	0.0981661	0.0787304	2489	tags=33%, list=13%, signal=29%	PTPRC/PLEK/FCRL3/LILRB2/CD300A/MEF2C/PRKCD/PPP1R15A/JAK2/IFNG/PPP1R16B/DLC1/CD33/SRC/CALM1/RIPK3/CALM3/RGN
GOBP_GLYCEROLIPID_CATABOLIC_PROCESS	GOBP_GLYCEROLIPID_CATABOLIC_PROCESS	71	0.489554	1.54383	0.0158356	0.0985661	0.0790512	2132	tags=25%, list=11%, signal=23%	FABP1/FABP4/APOA1/FABP3/PLA2G7/CPS1/LIPC/MGLL/APOA5/ABHD12B/APOC1/ABHD6/PIK3CG/PLIN5/APOC2/APOC3/FABP5/PLA2G10
GOBP_NEGATIVE_REGULATION_OF_NEURON_DEATH	GOBP_NEGATIVE_REGULATION_OF_NEURON_DEATH	177	0.391596	1.38942	0.0158676	0.0986714	0.0791357	2249	tags=22%, list=12%, signal=20%	CORO1A/CX3CR1/FYN/BTG2/CCL2/TERT/TNFRSF1B/HLA-F/BCL2/PTK2B/C5AR1/PPT1/AKT1/GPNMB/NTRK2/NR4A2/MEF2C/CHMP4A/HMOX1/SOD2/ARRB2/LGMN/JAK2/LRRK2/LRP1/CX3CL1/CBL/REL/BOK/CD200/APOE/GRN/MDK/F2R/ARRB1/PPARA/TGFB3/AXL/KDM2B
GOBP_REGULATION_OF_SUPRAMOLECULAR_FIBER_ORGANIZATION	GOBP_REGULATION_OF_SUPRAMOLECULAR_FIBER_ORGANIZATION	326	0.344242	1.29259	0.0158828	0.0986725	0.0791366	2845	tags=26%, list=15%, signal=23%	CORO1A/GPR65/PLEK/CCR7/GMFG/PTGER4/HCK/CXCL12/CAPG/HCLS1/CDC42EP3/ACTN2/COTL1/TMSB10/GSN/APOA1/EVL/PTK2B/ICAM1/FLNA/NCKAP1L/PREX1/FCHSD2/STMN2/ELN/ARPC2/VASP/SERPINF2/SSH2/WDR1/NAV3/PFN1/ARAP1/PRKCD/NIN/AEBP1/WASF2/PFDN5/CTNNA2/CORO1B/CIB1/SYNPO2/SH3BP1/CX3CL1/LPAR1/SORBS3/SYNPO/CAPZB/DLC1/APOE/S100A10/SFRP1/C9orf72/PXN/GPX1/PYCARD/TWF2/ARPC4/TMSB4X/CCL21/S1PR1/CLU/RB1/BMP10/TGFB3/DBNL/FERMT2/ACT…
GOBP_CELLULAR_AMINO_ACID_BIOSYNTHETIC_PROCESS	GOBP_CELLULAR_AMINO_ACID_BIOSYNTHETIC_PROCESS	68	-0.49026	-1.53701	0.0159563	0.098991	0.0793921	3251	tags=43%, list=17%, signal=35%	MTR/SRR/PSAT1/MTRR/GLUD2/BCAT2/GPT2/CLN3/PLOD3/AASDHPPT/ASNSD1/PYCR2/SERINC3/ALDH18A1/SERINC5/CTH/AASS/UPB1/BHMT2/PSPH/PLOD2/BHMT/APIP/ENOPH1/DHFR/OAT/NAGS/GAD1/ASNS
GOBP_MYELOID_DENDRITIC_CELL_ACTIVATION	GOBP_MYELOID_DENDRITIC_CELL_ACTIVATION	27	0.620245	1.63703	0.0159643	0.098991	0.0793921	1801	tags=33%, list=9%, signal=30%	CD2/DOCK2/IRF4/SPI1/NOTCH2/HAVCR2/SLAMF1/CLEC4D/PYCARD
GOBP_LONG_TERM_MEMORY	GOBP_LONG_TERM_MEMORY	32	-0.594363	-1.60958	0.0160295	0.0991498	0.0795194	756	tags=9%, list=4%, signal=9%	ADCY1/RPS6KB1/TAC1
GOBP_REGULATION_OF_IRE1_MEDIATED_UNFOLDED_PROTEIN_RESPONSE	GOBP_REGULATION_OF_IRE1_MEDIATED_UNFOLDED_PROTEIN_RESPONSE	13	-0.762934	-1.72077	0.0160396	0.0991498	0.0795194	981	tags=31%, list=5%, signal=29%	TMEM33/DNAJB9/COPS5/AGR2
GOBP_ACTIVATED_T_CELL_PROLIFERATION	GOBP_ACTIVATED_T_CELL_PROLIFERATION	43	0.545124	1.58042	0.0160409	0.0991498	0.0795194	3118	tags=42%, list=16%, signal=35%	IL23A/FYN/BTN3A1/LGALS9/IL12RB1/IGFBP2/LRRC32/PDCD1LG2/IL2RA/PRNP/PYCARD/RIPK3/CRTAM/ARG1/LILRB4/AGER/RPS3/HMGB1
GOBP_VESICLE_MEDIATED_TRANSPORT_TO_THE_PLASMA_MEMBRANE	GOBP_VESICLE_MEDIATED_TRANSPORT_TO_THE_PLASMA_MEMBRANE	82	-0.468275	-1.50324	0.0160505	0.0991498	0.0795194	3261	tags=33%, list=17%, signal=27%	RAB10/ANKRD50/GOLGA7/VPS35/EXOC2/CLN3/SNAP25/STX3/CCDC93/BBS1/NSF/LYPLA1/BBS2/VPS26A/STXBP6/SNX27/ANKRD27/EXOC6/GOLPH3L/PREPL/ARFGEF2/GOLGA4/BLZF1/CNST/EXOC8/ACSL3/STEAP2
GOBP_POSITIVE_REGULATION_OF_EXTRINSIC_APOPTOTIC_SIGNALING_PATHWAY	GOBP_POSITIVE_REGULATION_OF_EXTRINSIC_APOPTOTIC_SIGNALING_PATHWAY	46	0.526179	1.54909	0.0161189	0.0994786	0.0797831	2896	tags=39%, list=15%, signal=33%	PTPRC/SRPX/TNFSF10/STK4/TIMP3/PMAIP1/TNFSF12/SFRP1/PYCARD/PPP2R1B/INHBA/CYLD/RBCK1/FAF1/TNF/PPP1CA/DEDD2/BCL10
GOMF_CATALYTIC_ACTIVITY_ACTING_ON_A_RRNA	GOMF_CATALYTIC_ACTIVITY_ACTING_ON_A_RRNA	15	-0.712257	-1.6313	0.0161542	0.0996025	0.0798825	4312	tags=67%, list=23%, signal=52%	TRMT112/TFB1M/FTSJ3/NSUN5/NSUN4/NOP2/EMG1/TRMT61B/METTL5/TFB2M
GOBP_INTRACILIARY_TRANSPORT_INVOLVED_IN_CILIUM_ASSEMBLY	GOBP_INTRACILIARY_TRANSPORT_INVOLVED_IN_CILIUM_ASSEMBLY	35	-0.574351	-1.607	0.0162311	0.0999823	0.0801871	2772	tags=51%, list=15%, signal=44%	IFT46/IFT88/TTC21B/IFT172/TRAF3IP1/TRIP11/IFT20/IFT80/KIF3B/IFT27/KIFAP3/IFT81/SSX2IP/DYNC2H1/WDR35/DYNC2LI1/TNPO1/KIF3A
GOCC_ORGANELLAR_RIBOSOME	GOCC_ORGANELLAR_RIBOSOME	81	-0.464682	-1.48454	0.0162748	0.100157	0.0803274	5330	tags=53%, list=28%, signal=38%	MRPL36/MRPL47/MRPL48/NDUFAB1/MRPS28/MRPS18B/MRPL22/MRPS17/MRPS5/MRPL11/MRPL14/MRPS24/MRPS18C/MRPL35/MRPL16/MRPS7/MRPL18/MRPS22/NSUN4/MRPL32/MRPL27/MRPL21/MRPS33/MRPL39/MRPL51/MRPL42/MRPS16/MRPL2/MRPS36/MRPL45/MRPS21/MRPL3/MRPS27/MRPS30/MRPS35/MRPL15/DAP3/MRPL24/MRPL10/MRPL30/MRPL19/MRPL13/MRPS10
GOBP_ORGANELLE_TRANSPORT_ALONG_MICROTUBULE	GOBP_ORGANELLE_TRANSPORT_ALONG_MICROTUBULE	72	-0.473036	-1.48014	0.016345	0.100495	0.0805983	2607	tags=26%, list=14%, signal=23%	CLN3/VAMP7/RAB1A/KIF3B/OPA1/AP3S1/SPAST/KIFAP3/KIF1B/KIF5B/AP3B1/FBXW11/RHOT1/LRPPRC/WASF1/SYBU/MAP2/COPG2/KIF3A
GOBP_ZYMOGEN_ACTIVATION	GOBP_ZYMOGEN_ACTIVATION	52	0.524899	1.57701	0.0164664	0.101146	0.0811205	2065	tags=38%, list=11%, signal=34%	CD5L/IFI16/CTSZ/F9/SERPINF2/CIDEB/FGA/CASP8/C1R/PLAT/HP/LGMN/RIPK2/FGG/KLKB1/FGB/HPR/C1RL/PYCARD/CTSH
GOCC_PEPTIDASE_COMPLEX	GOCC_PEPTIDASE_COMPLEX	85	-0.451742	-1.46473	0.0165418	0.101419	0.0813396	4185	tags=44%, list=22%, signal=34%	F3/UBQLN1/PSME4/PSMC4/PSMD10/PSMB3/PSMB5/TAF6/PSMC3/USP22/SEC11A/PSMB4/UBQLN4/ENY2/USP14/SEC11C/PSME3/PSMC5/PIGS/PSMD4/GPAA1/PSMD6/PSMC2/PSMA1/SPCS1/PIGU/PSMC6/IDE/UBE3C/PSMD11/TXNL1/TAF9/PSMD14/UCHL5/PAAF1/PSMD12/TADA1
GOCC_PRERIBOSOME_LARGE_SUBUNIT_PRECURSOR	GOCC_PRERIBOSOME_LARGE_SUBUNIT_PRECURSOR	22	-0.667282	-1.66384	0.0165418	0.101419	0.0813396	4769	tags=59%, list=25%, signal=44%	WDR37/NSA2/LAS1L/RPF1/FTSJ3/MDN1/EIF6/ZNF622/RRP1B/RRS1/MAK16/RRP15/WDR12
GOBP_RESPONSE_TO_HYDROGEN_PEROXIDE	GOBP_RESPONSE_TO_HYDROGEN_PEROXIDE	121	0.426929	1.4523	0.0166732	0.102129	0.0819091	2988	tags=36%, list=16%, signal=31%	FYN/ANXA1/ETS1/NQO1/FABP1/HGF/KLF2/HBB/BCL2/PTK2B/KLF4/TXNIP/TNFAIP3/SLC8A1/HMOX1/AQP1/PRKCD/SOD2/HP/RELA/LRRK2/GPR37/FXN/GNAO1/FOXO1/MB/DUSP1/GPX1/SRC/KDM6B/RIPK3/SIRPA/AXL/CRK/IL18RAP/JUN/MAP3K5/ADA/EEF2/ARG1/SETX/ERN1/HSF1/RPS3
GOBP_CELLULAR_AMINO_ACID_METABOLIC_PROCESS	GOBP_CELLULAR_AMINO_ACID_METABOLIC_PROCESS	286	-0.341928	-1.28068	0.0167617	0.102575	0.0822665	3294	tags=29%, list=17%, signal=25%	PSMC3/AARSD1/MTR/SDS/SRR/PSAT1/DIO1/MTRR/PFAS/GLUD2/YARS2/BCAT2/MARS2/AHCY/GPT2/PSMB4/AUH/CLN3/PLOD3/ACADSB/AASDHPPT/FN3K/CDO1/ASNSD1/PYCR2/PSME3/PSMC5/PSMD4/SERINC3/ALDH18A1/DARS2/PTS/DDC/PSMD6/SERINC5/PSMC2/ASRGL1/PSMA1/IYD/HARS2/SIRT4/AFMID/CTH/AASS/PSMC6/UPB1/AIMP1/ALDH7A1/MCCC2/AIMP2/CTPS2/PPAT/BHMT2/PSMD11/FARSB/GCLC/GFPT1/ODC1/PSPH/PLOD2/AZIN1/ALDH5A1/BHMT/NOS2/PSMD14/APIP/BLMH/CAD/IARS2/E…
GOBP_PROTEIN_HYDROXYLATION	GOBP_PROTEIN_HYDROXYLATION	20	-0.69582	-1.71277	0.0168346	0.102925	0.0825474	2554	tags=35%, list=13%, signal=30%	OGFOD1/PLOD3/EGLN1/PLOD2/ASPH/P4HA2/FKBP10
GOBP_REGULATION_OF_CELL_FATE_COMMITMENT	GOBP_REGULATION_OF_CELL_FATE_COMMITMENT	27	-0.626257	-1.63795	0.0168676	0.103031	0.0826321	709	tags=19%, list=4%, signal=18%	BMPR1A/FGF2/SFRP2/ESRP1/DKK1
GOBP_MICROTUBULE_CYTOSKELETON_ORGANIZATION	GOBP_MICROTUBULE_CYTOSKELETON_ORGANIZATION	495	-0.320389	-1.24672	0.0170779	0.104218	0.0835843	4398	tags=28%, list=23%, signal=22%	CENPH/TTLL4/BBS4/NCKAP5/MAD2L1/CEP152/MARK3/NSFL1C/SLK/SS18/RAC1/CUL9/KIF18A/SKA1/SENP6/KAT2A/IFT172/CAMSAP1/EML1/CHEK1/MAPRE1/TUBA1C/BCCIP/CHMP2B/DYNC1LI1/GBA2/GAS2/TMEM67/TBCD/STAG2/LSM14A/SPRY1/MLH1/TUBG2/HNRNPU/TRAF3IP1/CHMP4C/CDK5R1/CHORDC1/RAE1/ZW10/SPAG1/RGS14/HSPA1B/ZNF207/PARD6G/KATNA1/VPS4B/SKA2/CLIP1/CEP72/EML4/TUBA1B/SMC3/NAT10/CLASP2/RANBP9/TUBGCP4/CKAP5/CTNNB1/DRG1/PARD3/GCC2/FER/TT…
GOBP_EPIDERMIS_DEVELOPMENT	GOBP_EPIDERMIS_DEVELOPMENT	430	-0.320468	-1.23949	0.0170942	0.10422	0.0835859	1550	tags=9%, list=8%, signal=9%	KRT8/NSDHL/CRABP2/PIP5K1A/PDGFA/SOX9/AP3B1/ROCK2/ATP2A2/HDAC2/LDB2/SOS1/NSUN2/ZMPSTE24/HRNR/PKP4/CD109/PTHLH/DSP/FZD6/YAP1/ERRFI1/LAMC2/NOM1/DSC2/LGR5/PLS1/ETV4/FERMT1/ADAM9/MYO6/PI3/KRT7/KRT23/REG3A/ESRP1/DSG2/KRT19/FOXQ1/KRT20
GOBP_PROTEIN_KINASE_C_ACTIVATING_G_PROTEIN_COUPLED_RECEPTOR_SIGNALING_PATHWAY	GOBP_PROTEIN_KINASE_C_ACTIVATING_G_PROTEIN_COUPLED_RECEPTOR_SIGNALING_PATHWAY	26	0.631614	1.65184	0.0171201	0.104282	0.0836352	2159	tags=31%, list=11%, signal=27%	DGKA/HTR2B/DGKE/LRP1/F2R/CISH/DGKZ/BDKRB1
GOBP_T_CELL_CHEMOTAXIS	GOBP_T_CELL_CHEMOTAXIS	24	0.640195	1.6472	0.0171806	0.104553	0.0838527	836	tags=29%, list=4%, signal=28%	CCL5/CXCL10/CCR2/GPR183/PIK3CD/CXCL11/CXCL13
GOMF_UNFOLDED_PROTEIN_BINDING	GOMF_UNFOLDED_PROTEIN_BINDING	108	-0.420521	-1.4113	0.0172625	0.10493	0.0841554	3968	tags=40%, list=21%, signal=32%	HYOU1/SERPINH1/CCT6B/HSPA5/SYVN1/TMEM67/CCT8/CLPX/HSPA1B/UGGT1/HSP90B1/PFDN2/MDN1/DNAJA2/PTGES3/ST13/HSPE1/DNAJB4/UGGT2/CCT2/NDUFAF1/ERLEC1/HSPD1/SHQ1/CCT4/PFDN4/HSP90AB1/DNAJB6/MKKS/DNAJB11/NPM1/VBP1/CCT5/CCT3/CANX/HSPA9/TTC1/SCG5/TOMM20/NUDCD2/CCT6A/GRPEL2/CLGN
GOBP_TYPE_2_IMMUNE_RESPONSE	GOBP_TYPE_2_IMMUNE_RESPONSE	35	0.572097	1.57511	0.0172747	0.10493	0.0841554	1753	tags=29%, list=9%, signal=26%	IDO1/CD74/CCR2/ANXA1/CD86/IL33/IL4R/GATA3/CD81/NOD2
GOCC_POSTSYNAPTIC_SPECIALIZATION_INTRACELLULAR_COMPONENT	GOCC_POSTSYNAPTIC_SPECIALIZATION_INTRACELLULAR_COMPONENT	14	0.744258	1.67412	0.0173346	0.105196	0.0843688	3036	tags=57%, list=16%, signal=48%	FYN/SRGN/LYN/ACTN2/SRC/TNIK/BCR/DNM2
GOBP_SKIN_MORPHOGENESIS	GOBP_SKIN_MORPHOGENESIS	11	-0.753998	-1.60951	0.0173729	0.105331	0.0844771	457	tags=55%, list=2%, signal=53%	COL1A1/GBA/COL1A2/ERRFI1/ITGA6/ITGA2
GOMF_QUATERNARY_AMMONIUM_GROUP_BINDING	GOMF_QUATERNARY_AMMONIUM_GROUP_BINDING	28	0.589036	1.56219	0.0174139	0.105436	0.0845609	2870	tags=32%, list=15%, signal=27%	IGHM/RASGRP1/APOA1/APOA5/CETP/APOC1/PLTP/PITPNM2/APOA4
GOBP_CELLULAR_RESPONSE_TO_CHEMICAL_STRESS	GOBP_CELLULAR_RESPONSE_TO_CHEMICAL_STRESS	315	0.345783	1.2956	0.0174224	0.105436	0.0845609	2732	tags=26%, list=14%, signal=22%	FYN/CYBB/FBLN5/MMP9/CYBA/ANXA1/ETS1/FAS/PDGFRA/AIF1/RCSD1/NQO1/FABP1/HGF/KLF2/TSPO/NCF2/BCL2/KLF4/AKR1B1/AKT1/TNFAIP3/FOS/ARL6IP5/BTK/ALOX5/NR4A2/ATM/GSTP1/LRRC8C/CAPN3/HMOX1/AQP1/MSRA/TLR4/PRKCD/SOD2/CFLAR/RELA/JAK2/GPX2/DAPK1/LRRK2/FUT8/TP53/SIRT2/GPR37/ZC3H12A/GCH1/EPAS1/FXN/FOXO1/STX4/SLC12A6/MMP2/PXN/GPX1/SERPINB6/SRC/KDM6B/RIPK3/SIRPA/AXL/CRK/NCF4/SLC1A1/IL18RAP/SLC25A24/GATA4/JUN/MAP3K5/AR…
GOBP_CELLULAR_OXIDANT_DETOXIFICATION	GOBP_CELLULAR_OXIDANT_DETOXIFICATION	90	0.452977	1.48572	0.0175745	0.106258	0.0852204	3482	tags=32%, list=18%, signal=26%	FBLN5/NQO1/FABP1/IPCEF1/HBB/ALOX5AP/GSTP1/CLIC2/SOD2/GSTT1/HP/GSTZ1/GPX2/GCH1/PTGS1/APOE/ALB/GPX1/APOM/S100A9/DUOX2/DUOX1/APOA4/HBM/PTGES/GPX4/GPX7/HBE1/CYGB
GOCC_NUCLEAR_CHROMOSOME	GOCC_NUCLEAR_CHROMOSOME	192	-0.384509	-1.37752	0.0176095	0.106372	0.0853116	4142	tags=31%, list=22%, signal=25%	MCM6/ACTR5/CPSF6/SMARCA5/CHEK1/BRMS1L/RBBP4/MSH5/RPA4/TIMELESS/MLH1/HNRNPU/PMF1/MCM10/TOP1/EXOSC9/ING3/RAD1/ANP32E/MORF4L1/SMC3/MCM7/BUB1/SAP130/RAD21/CENPK/ATRX/IK/INO80C/DSN1/SMARCAD1/PLRG1/CSNK2A1/PELI1/HUS1/BCAS2/RRS1/HORMAD1/KIFAP3/NFRKB/ACTR6/ACTL6A/ETAA1/GINS1/TOPBP1/RAD50/HDAC2/TUBG1/UCHL5/BRD8/LRPPRC/CCNB1/TOP2A/CDC5L/PCNA/SYCP3/PRIM1/TRIM24/MCM4/HMGA2
GOCC_9PLUS2_MOTILE_CILIUM	GOCC_9PLUS2_MOTILE_CILIUM	88	-0.452768	-1.47109	0.0177129	0.106898	0.0857334	2306	tags=17%, list=12%, signal=15%	SPAG16/ATP1A1/IQCG/RPGR/PRKAR1A/IFT27/SQSTM1/SCNN1A/PACRG/ATP1B1/VPS13A/SLC26A6/CABYR/DNAH11/MNS1
GOBP_PROTEIN_LOCALIZATION_TO_NUCLEAR_BODY	GOBP_PROTEIN_LOCALIZATION_TO_NUCLEAR_BODY	12	-0.75508	-1.65415	0.0177624	0.107097	0.0858935	4534	tags=83%, list=24%, signal=64%	MEPCE/TCP1/LARP7/CCT8/DKC1/CCT2/CCT4/CCT5/CCT3/CCT6A
GOBP_RAS_PROTEIN_SIGNAL_TRANSDUCTION	GOBP_RAS_PROTEIN_SIGNAL_TRANSDUCTION	314	0.352522	1.31941	0.0178182	0.107335	0.0860842	3036	tags=26%, list=16%, signal=22%	RAC2/ARHGDIB/GPR65/GPR174/RHOH/FBP1/P2RY8/AIF1/CDC42EP3/LPAR6/LYN/RASGRP1/TIAM1/APOA1/RASGRF1/ITPKB/RASGRP2/GPR18/RASA3/P2RY10/CDC42SE1/RHOG/STK19/RAPGEF1/NGFR/ARHGEF3/CDC42SE2/ADRA2A/NOTCH2/RAP2B/PSD4/WASF2/TIMP2/ARHGEF1/RRAS/JAK2/SH3BP1/TP53/CBL/RASGRP4/LPAR1/ARHGAP4/CYTH4/DLC1/APOE/PIK3CG/HEG1/ADRA1A/VAV1/DNMT1/KSR1/APOC3/F2R/ARRB1/RASSF1/ARHGAP24/RB1/DBNL/CRK/CDKN2A/RAP1B/GNB1/DOK2/RANGRF/RAS…
GOMF_MOTOR_ACTIVITY	GOMF_MOTOR_ACTIVITY	124	-0.416478	-1.41601	0.0178526	0.107374	0.086115	2563	tags=22%, list=13%, signal=19%	DYNLT3/SMC3/MYH14/MYO1E/MYO1B/KIFC2/DNAH14/KIF3B/MYO5C/DYNC1I2/KIF20A/KIF26B/KIF1B/KIF5B/MYO19/CGN/DYNC2H1/MYO5B/DNAH12/KIF16B/DYNC2LI1/MYO1D/KIF21A/KIF3A/MYH4/MYO6/DNAH11
GOCC_LATERAL_PLASMA_MEMBRANE	GOCC_LATERAL_PLASMA_MEMBRANE	59	-0.515499	-1.58934	0.0178573	0.107374	0.086115	3682	tags=37%, list=19%, signal=30%	TBCD/RAB13/SLC6A9/CLDN15/JUP/CTNNB1/CEACAM1/TACSTD2/DLG1/APC/ATP1A1/GPSM2/ERBB3/OCLN/CLDN7/ATP1B1/SLC16A1/CLDN4/KCNB1/EPCAM/SLC12A2/DSG2
GOMF_SIALIC_ACID_BINDING	GOMF_SIALIC_ACID_BINDING	20	0.672028	1.66491	0.0181297	0.108911	0.0873483	3018	tags=45%, list=16%, signal=38%	FCN1/ST8SIA4/CD22/SELP/CD33/SIGLEC14/SIGLEC5/SIGLEC16/SIGLEC9
GOMF_CYSTEINE_TYPE_ENDOPEPTIDASE_ACTIVITY_INVOLVED_IN_APOPTOTIC_SIGNALING_PATHWAY	GOMF_CYSTEINE_TYPE_ENDOPEPTIDASE_ACTIVITY_INVOLVED_IN_APOPTOTIC_SIGNALING_PATHWAY	10	0.781791	1.63959	0.018472	0.110866	0.088916	1472	tags=60%, list=8%, signal=55%	CASP1/CASP8/CFLAR/CASP4/CASP10/CASP12
GOBP_DETECTION_OF_BIOTIC_STIMULUS	GOBP_DETECTION_OF_BIOTIC_STIMULUS	35	0.56998	1.56928	0.0185426	0.111187	0.0891737	2743	tags=51%, list=14%, signal=44%	SRPX/HLA-DRB1/CLEC7A/CDHR2/TSPO/HLA-B/LBP/TLR2/TLR4/HLA-A/NOD2/TLR1/LY96/TREM2/PTPRJ/CRTAM/SSC5D/NLRC4
GOBP_SINGLE_FERTILIZATION	GOBP_SINGLE_FERTILIZATION	139	-0.398743	-1.3807	0.018701	0.112035	0.0898534	4188	tags=24%, list=22%, signal=19%	PLCD4/TCP1/HOXD9/CACNA1H/GNPDA1/CCT8/UBAP2L/SPAG1/CATSPER2/MFGE8/ZP3/FETUB/KCNU1/TRPC7/CD9/HEXB/ADAM21/CCT2/UBXN8/POMZP3/CCT4/IGSF8/CDK1/CD46/FOLR1/AP3B1/CCT5/CCT3/KDM5B/GLRB/CLGN/TEX101/SPINK1/PLCB1
GOBP_MODULATION_OF_PROCESS_OF_OTHER_ORGANISM	GOBP_MODULATION_OF_PROCESS_OF_OTHER_ORGANISM	115	0.425008	1.44412	0.0187379	0.112153	0.0899483	2695	tags=28%, list=14%, signal=24%	CCL5/PRF1/MPEG1/CD4/CRP/CLEC7A/LEF1/SYK/CSF1R/SERPINB9/AQP1/PTX3/CASP8/APCS/IFI27/CLEC4M/IFNG/P2RX7/CCL8/ZC3H12A/APOE/STOM/SP1/PPIB/S100A9/PC/CCL3/JUN/ZBED1/REST/ARG1/CTDP1
GOMF_MICROTUBULE_MOTOR_ACTIVITY	GOMF_MICROTUBULE_MOTOR_ACTIVITY	66	-0.485288	-1.51781	0.0187738	0.112177	0.0899674	3529	tags=27%, list=19%, signal=22%	APPBP2/KIF9/KIF27/SMC3/KIFC2/DNAH14/KIF3B/DYNC1I2/KIF20A/KIF26B/KIF1B/KIF5B/DYNC2H1/DNAH12/KIF16B/KIF21A/KIF3A/DNAH11
GOBP_TEMPERATURE_HOMEOSTASIS	GOBP_TEMPERATURE_HOMEOSTASIS	168	0.389663	1.37382	0.0187761	0.112177	0.0899674	3245	tags=29%, list=17%, signal=24%	LCN2/UCP2/PLAC8/CCR2/CXCR4/SYK/IRF4/ESRRG/FABP4/PLCL2/IL1B/TLR4/TRPV2/JAK2/IL4R/GADD45G/PEMT/MAP2K6/EPAS1/ABHD6/CPT2/STAT3/FOXO1/GNAS/CNR1/GPX1/KDM6B/TLE3/NR1H3/FABP5/RB1/IL15/LNPEP/IL18R1/PRKAB1/PER2/TNF/HSF1/CMKLR1/PRLR/TFE3/DYNC1H1/OGT/GPR3/ACADVL/PTGES/PHOX2B/EGR1/PPARGC1A
GOBP_NEGATIVE_REGULATION_OF_OSSIFICATION	GOBP_NEGATIVE_REGULATION_OF_OSSIFICATION	34	-0.570975	-1.57652	0.0188087	0.11222	0.0900022	540	tags=9%, list=3%, signal=9%	GREM1/CALCA/DKK1
GOBP_REGULATION_OF_TOLL_LIKE_RECEPTOR_9_SIGNALING_PATHWAY	GOBP_REGULATION_OF_TOLL_LIKE_RECEPTOR_9_SIGNALING_PATHWAY	11	0.774063	1.66302	0.0188177	0.11222	0.0900022	183	tags=18%, list=1%, signal=18%	PTPN22/FCRL3
GOCC_U2_TYPE_SPLICEOSOMAL_COMPLEX	GOCC_U2_TYPE_SPLICEOSOMAL_COMPLEX	87	-0.434536	-1.40932	0.019033	0.113401	0.0909491	4634	tags=39%, list=24%, signal=30%	BUD31/CWC15/DHX15/TXNL4A/SNRPG/BUD13/SYF2/LUC7L2/SNRPD1/SNW1/SNRPB2/LSM3/MAGOHB/EFTUD2/EIF4A3/SNRPC/PRPF40A/SNRPE/PRPF6/LSM5/MFAP1/IK/PLRG1/BCAS2/PRPF3/PPIL1/LUC7L3/PRPF18/CRNKL1/CWC27/CASC3/HTATSF1/CDC5L/SNRPN
GOBP_EAR_DEVELOPMENT	GOBP_EAR_DEVELOPMENT	192	-0.383004	-1.37212	0.0190648	0.113488	0.0910186	3446	tags=21%, list=18%, signal=17%	SEC24B/PRKRA/EDN1/WNT5A/SPARC/LIN7A/HESX1/CEP290/SOBP/SIX4/PTPN11/TRIP11/IFT20/CHD7/JAG1/CCNA2/GJB6/NEUROD1/TSKU/OPA1/SLC25A27/IFT27/SOX9/ADAM10/INSIG1/LRIG3/DDR1/ATP8B1/BMP2/FZD6/HOXA13/CTHRC1/LGR5/PLS1/COL11A1/MYO6/ESRP1/DLX6/FREM2/HOXA1
GOBP_DENDRITIC_SPINE_DEVELOPMENT	GOBP_DENDRITIC_SPINE_DEVELOPMENT	92	-0.441578	-1.44727	0.0191083	0.113643	0.0911435	2192	tags=24%, list=12%, signal=21%	PLK2/MTOR/SRCIN1/FMR1/DNM1L/CAPRIN2/OPA1/ARF4/EIF4G2/ADAM10/CAPRIN1/HDAC2/PAK3/WASL/LLPH/ACSL4/SHANK2/PPP1R9A/DBN1/DLG5/CTNND2/RELN
GOBP_TRANSLATIONAL_ELONGATION	GOBP_TRANSLATIONAL_ELONGATION	120	-0.42564	-1.44098	0.0191843	0.113992	0.0914228	5457	tags=53%, list=29%, signal=38%	MRPL33/DPH2/DPH3/MRPL36/DPH5/MRPL47/MRPL48/SEPSECS/EEF2K/MRPS28/MRPS18B/EEF1B2/MRPL22/MRPS17/MRPS5/MRPL11/EEF1A2/MRPL14/SECISBP2/MRPS24/MRPS18C/MRPL35/ERAL1/MRPL16/GRM5/MRPS7/MRPL18/MRPS22/TSFM/MRPL32/MRPL27/MRPL1/MRPL21/MRPS33/EIF4A3/MRPL39/MRPS25/MRPL51/MRPL42/GTPBP2/MRPS16/MRPL2/MRPS36/SRP9/MRPL45/MRPS21/MRPL3/MRPS27/GFM1/MRPS30/MRPS35/MRPS23/MRPL15/DAP3/DNAJC24/MRPL24/HBS1L/MRPL10/DIO2/MRPL30…
GOMF_MANNOSYLTRANSFERASE_ACTIVITY	GOMF_MANNOSYLTRANSFERASE_ACTIVITY	24	-0.652125	-1.66432	0.0192143	0.114067	0.0914829	5008	tags=62%, list=26%, signal=46%	POMT2/ALG12/DPY19L3/TMTC4/TMTC1/ALG1/PIGV/PIGB/TMTC3/DPY19L1/ALG9/DPY19L4/DPM1/ALG8/PIGM
GOBP_REGULATION_OF_DNA_DEPENDENT_DNA_REPLICATION	GOBP_REGULATION_OF_DNA_DEPENDENT_DNA_REPLICATION	43	-0.523431	-1.53297	0.0192997	0.11447	0.091806	3998	tags=40%, list=21%, signal=31%	RFC3/DBF4/TIMELESS/WRNIP1/ATG7/SENP2/RFC2/LIG3/ATRX/MSH3/POLG2/DSCC1/DONSON/ZMPSTE24/PCNA/GMNN/DACH1
[truncated: 455 more rows]
