# Supplementary material for: Study of TRAF3IP3 for prognosis and immune infiltration in hepatocellular carcinoma
Source: PeerJ. 2024 Dec 12;12:e18538. doi: 10.7717/peerj.18538 (PMC11646420; doi:10.7717/peerj.18538)
Supplement: Supplemental Information 14 [file peerj-12-18538-s014.xlsx]

## Sheet: Sheet2
Admission number	Tumor	Normal
1	0.212	0.335
2	1.5	2.474
3	0.107	0.267
4	0.105	0.223
5	0.148	0.242
6	0.157	0.264
7	1.237	2.475
8	0.089	0.173
9	0.103	0.223
10	1.15	2.449
11	0.19	0.335
12	0.066	0.235
13	0.107	0.26
14	0.11	0.282
15	0.103	0.211
16	0.182	0.32
17	0.178	0.336
18	0.157	0.294
19	1.343	2.429
20	1.462	2.407
